# Supplementary material
Source: PubMed Central journal article supplement (PMC5590373)
Supplement: NIHMS898870-supplement-supporting_information.pdf [file NIHMS898870-supplement-supporting_information.pdf]

# **Iodonium Metathesis Reactions**

Takahito Kasahara,<sup>1</sup> Young Jin Jang,<sup>1</sup> Léanne Racicot,<sup>1</sup> Dimitrios Panagopoulos,<sup>1</sup> Steven H. Liang,<sup>2</sup> and  
Marco A. Ciufolini<sup>1\*</sup>

<sup>1</sup>Department of Chemistry, University of British Columbia, 2036 Main Mall, Vancouver, BC V6T 1Z1,  
Canada

<sup>2</sup>Department of Radiology, Harvard Medical School and Division of Nuclear Medicine and Molecular  
Imaging, Massachusetts General Hospital, 55 Fruit Street, Boston, MA 02114, USA

## **Supporting Information**

## Table of Contents

|                                                                                                                 |           |
|-----------------------------------------------------------------------------------------------------------------|-----------|
| <b>1. Experimental Protocols</b>                                                                                | <b>S4</b> |
| <b>2. Preparation of Iodonium Triflates</b>                                                                     | <b>S5</b> |
| a. Mesityl-4-nitrophenyliodonium triflate                                                                       | S5        |
| b. 4-Carbomethoxyphenyl-2-thienyliodonium triflate                                                              | S5        |
| <b>3. General Procedures for Melt Metathesis Reaction</b>                                                       | <b>S7</b> |
| a. Melt metathesis between Ph <sub>2</sub> IOTf and 4-iodotoluene                                               | S7        |
| b. Melt metathesis between Ph <sub>2</sub> IOTf and 4-iodoanisole                                               | S7        |
| <b>4. General Procedure for Solution Metathesis Reactions</b>                                                   | <b>S9</b> |
| a. Solution metathesis between Ph <sub>2</sub> IOTf and 4-iodotoluene (Entry 1a)                                | S9        |
| b. Solution metathesis between Ph <sub>2</sub> IOTf and 4-iodoanisole (Entry 1b)                                | S9        |
| c. Solution metathesis between Ph <sub>2</sub> IOTf and 1-iodonaphthalene (Entry 1c)                            | S10       |
| d. Solution metathesis between 4-carbomethoxyphenyl-phenyliodonium triflate and iodobenzene (Entry 2a)          | S10       |
| e. Solution metathesis between 4-carbomethoxyphenyl-phenyliodonium triflate and 4-iodotoluene (Entry 2b)        | S10       |
| f. Solution metathesis between 4-carbomethoxyphenyl-phenyliodonium triflate and 4-iodoanisole (Entry 2c)        | S11       |
| g. Solution metathesis between 4-carbomethoxyphenyl-phenyliodonium triflate and 1-iodonaphthalene (Entry 2d)    | S11       |
| h. Solution metathesis between 4-nitrophenyl-phenyliodonium triflate and iodobenzene (Entry 3a)                 | S12       |
| i. Solution metathesis between 4-nitrophenyl-phenyliodonium triflate and 4-iodotoluene (Entry 3b)               | S12       |
| j. Solution metathesis between 4-nitrophenyl-phenyliodonium triflate and 4-iodoanisole (Entry 3c)               | S13       |
| k. Solution metathesis between 4-nitrophenyl-phenyliodonium triflate and 1-iodonaphthalene (Entry 3d)           | S13       |
| l. Solution metathesis between 4-anisyl-4-nitrophenyliodonium triflate and iodobenzene (Entry 3e)               | S13       |
| m. Solution metathesis between 4-anisyl-4-nitrophenyliodonium triflate and 4-iodotoluene (Entry 3f)             | S14       |
| n. Solution metathesis between 4-anisyl-4-nitrophenyliodonium triflate and 4-iodoanisole (Entry 3g)             | S14       |
| o. Solution metathesis between 4-anisyl-4-nitrophenyliodonium triflate and 1-iodonaphthalene (Entry 3h)         | S15       |
| p. Solution metathesis between mesityl-4-nitrophenyliodonium triflate and 4-iodotoluene (Entry 3i)              | S15       |
| q. Solution metathesis between mesityl-4-nitrophenyliodonium triflate and 4-iodoanisole (Entry 3j)              | S16       |
| r. Solution metathesis between mesityl-4-nitrophenyliodonium triflate and 1-iodonaphthalene (Entry 3k)          | S16       |
| s. Solution metathesis between 4-carbomethoxyphenyl-2-thienyliodonium triflate and iodobenzene (Entry 4a)       | S17       |
| t. Solution metathesis between 4-carbomethoxyphenyl-2-thienyliodonium triflate and 4-iodotoluene (Entry 4b)     | S17       |
| u. Solution metathesis between 4-carbomethoxyphenyl-2-thienyliodonium triflate and 4-iodoanisole (Entry 4c)     | S18       |
| v. Solution metathesis between 4-carbomethoxyphenyl-2-thienyliodonium triflate and 1-iodonaphthalene (Entry 4d) | S18       |

---

**5. Table of calculated charges on the I-atom of selected diaryliodonium triflates** **S19**

---

**6. Proton and <sup>13</sup>C NMR Spectra** **S20**

---

|                                                                                             |      |
|---------------------------------------------------------------------------------------------|------|
| <sup>1</sup> H NMR spectrum of mesityl-4-nitrophenyliodonium triflate                       | S20  |
| <sup>13</sup> C NMR spectrum of mesityl-4-nitrophenyliodonium triflate                      | S21  |
| <sup>1</sup> H NMR spectrum of 4-carbomethoxyphenyl-2-thienyliodonium triflate              | S23  |
| <sup>13</sup> C NMR spectrum of 4-carbomethoxyphenyl-2-thienyliodonium triflate             | S24  |
| <sup>1</sup> H NMR spectrum from melt metathesis of Ph <sub>2</sub> IOTf and 4-iodotoluene  | S26  |
| <sup>13</sup> C NMR spectrum from melt metathesis of Ph <sub>2</sub> IOTf and 4-iodotoluene | S28  |
| <sup>1</sup> H NMR spectrum from melt metathesis of Ph <sub>2</sub> IOTf and 4-iodoanisole  | S30  |
| <sup>13</sup> C NMR spectrum from melt metathesis of Ph <sub>2</sub> IOTf and 4-iodoanisole | S32  |
| <sup>1</sup> H NMR spectrum of the product mixture obtained in entry a of Table 1           | S34  |
| <sup>13</sup> C NMR spectrum of the product mixture obtained in entry a of Table 1          | S36  |
| <sup>1</sup> H NMR spectrum of the product mixture obtained in entry b of Table 1           | S38  |
| <sup>13</sup> C NMR spectrum of the product mixture obtained in entry b of Table 1          | S40  |
| <sup>1</sup> H NMR spectrum of the product mixture obtained in entry c of Table 1           | S42  |
| <sup>13</sup> C NMR spectrum of the product mixture obtained in entry c of Table 1          | S44  |
| <sup>1</sup> H NMR spectrum of the product mixture obtained in entry a of Table 2           | S46  |
| <sup>13</sup> C NMR spectrum of the product mixture obtained in entry a of Table 2          | S48  |
| <sup>1</sup> H NMR spectrum of the product mixture obtained in entry b of Table 2           | S50  |
| <sup>13</sup> C NMR spectrum of the product mixture obtained in entry b of Table 2          | S52  |
| <sup>1</sup> H NMR spectrum of the product mixture obtained in entry c of Table 2           | S54  |
| <sup>13</sup> C NMR spectrum of the product mixture obtained in entry c of Table 2          | S56  |
| <sup>1</sup> H NMR spectrum of the product mixture obtained in entry d of Table 2           | S58  |
| <sup>13</sup> C NMR spectrum of the product mixture obtained in entry d of Table 2          | S60  |
| <sup>1</sup> H NMR spectrum of the product mixture obtained in entry a of Table 3           | S62  |
| <sup>13</sup> C NMR spectrum of the product mixture obtained in entry a of Table 3          | S64  |
| <sup>1</sup> H NMR spectrum of the product mixture obtained in entry b of Table 3           | S66  |
| <sup>13</sup> C NMR spectrum of the product mixture obtained in entry b of Table 3          | S68  |
| <sup>1</sup> H NMR spectrum of the product mixture obtained in entry c of Table 3           | S70  |
| <sup>13</sup> C NMR spectrum of the product mixture obtained in entry c of Table 3          | S73  |
| <sup>1</sup> H NMR spectrum of the product mixture obtained in entry d of Table 3           | S75  |
| <sup>13</sup> C NMR spectrum of the product mixture obtained in entry d of Table 3          | S77  |
| <sup>1</sup> H NMR spectrum of the product mixture obtained in entry e of Table 3           | S79  |
| <sup>13</sup> C NMR spectrum of the product mixture obtained in entry e of Table 3          | S82  |
| <sup>1</sup> H NMR spectrum of the product mixture obtained in entry f of Table 3           | S84  |
| <sup>13</sup> C NMR spectrum of the product mixture obtained in entry f of Table 3          | S86  |
| <sup>1</sup> H NMR spectrum of the product mixture obtained in entry g of Table 3           | S88  |
| <sup>13</sup> C NMR spectrum of the product mixture obtained in entry g of Table 3          | S90  |
| <sup>1</sup> H NMR spectrum of the product mixture obtained in entry h of Table 3           | S92  |
| <sup>13</sup> C NMR spectrum of the product mixture obtained in entry h of Table 3          | S95  |
| <sup>1</sup> H NMR spectrum of the product mixture obtained in entry i of Table 3           | S97  |
| <sup>13</sup> C NMR spectrum of the product mixture obtained in entry i of Table 3          | S99  |
| <sup>1</sup> H NMR spectrum of the product mixture obtained in entry j of Table 3           | S101 |
| <sup>13</sup> C NMR spectrum of the product mixture obtained in entry j of Table 3          | S103 |
| <sup>1</sup> H NMR spectrum of the product mixture obtained in entry k of Table 3           | S105 |
| <sup>13</sup> C NMR spectrum of the product mixture obtained in entry k of Table 3          | S107 |
| <sup>1</sup> H NMR spectrum of the product mixture obtained in entry a of Table 4           | S109 |
| <sup>13</sup> C NMR spectrum of the product mixture obtained in entry a of Table 4          | S111 |
| <sup>1</sup> H NMR spectrum of the product mixture obtained in entry b of Table 4           | S113 |
| <sup>13</sup> C NMR spectrum of the product mixture obtained in entry b of Table 4          | S115 |
| <sup>1</sup> H NMR spectrum of the product mixture obtained in entry c of Table 4           | S117 |
| <sup>13</sup> C NMR spectrum of the product mixture obtained in entry c of Table 4          | S119 |
| <sup>1</sup> H NMR spectrum of the product mixture obtained in entry d of Table 4           | S121 |
| <sup>13</sup> C NMR spectrum of the product mixture obtained in entry d of Table 4          | S123 |

## 1. Experimental Protocols

Unless otherwise stated,  $^1\text{H}$  and  $^{13}\text{C}$  NMR spectra were recorded on Bruker model AVANCE II+ 300 (300 MHz for  $^1\text{H}$  and 75.5 MHz for  $^{13}\text{C}$ ) spectrometer using deuterioacetone ( $\text{C}_3\text{D}_6\text{O}$ ) as the solvent. Chemical shifts are reported in parts per million (ppm) on the  $\tau$  scale and coupling constants,  $J$ , are in hertz (Hz). Multiplicities are reported as “s” (singlet), “d” (doublet), “t” (triplet), “q” (quartet), “dd” (doublet of doublets), “ddd” (doublet of doublets of doublets), “m” (multiplet), “app” (apparent) and “br” (broad). Low-resolution mass spectra ( $m/z$ ) were obtained in the electrospray (ESI) mode on a Waters Micromass ZQ mass spectrometer. High-resolution mass spectra ( $m/z$ ) were recorded in the electrospray (ESI) mode on a Micromass LCT mass spectrometer by the UBC Mass Spectrometry laboratory. Low- and high-resolution mass spectra obtained in electron impact (EI) mode were recorded on MASPEC II System mass spectrometer by the UBC Mass Spectrometry laboratory. Melting points (uncorrected) were measured on a Mel-Temp apparatus. All reagents and solvents were commercial products and used without further purification except *m*CPBA, which was dried *in vacuo* (5g of *m*CPBA was dried for 1h under high-vacuum) and active content was determined by iodometric titration. Flash chromatography was performed on Silicycle 230-400 mesh silica gel. Analytic TLC was carried out with Merck silica gel 60 plates with fluorescent indicator. Spots were visualized with UV light. All reactions were performed under dry argon in flame- or oven-dried flasks equipped with Teflon<sup>TM</sup> stirbars. All flasks were fitted with rubber septa for the introduction of substrates, reagents and solvents via syringe. Solvents, pure liquid reagents or reagents in solution, and solids were added in one portion, unless otherwise stated.

## 2. Preparation of Iodonium Triflates

The following compounds were prepared as described in the literature and purified by dissolving in the minimal volume of hot MeCN, followed by addition of excess cold Et<sub>2</sub>O to induce crystallization: diphenyliodonium triflate,<sup>1</sup> 4-carbomethoxyphenyl-phenyliodonium triflate,<sup>1</sup> 4-nitrophenyl-phenyliodonium triflate,<sup>1</sup> 4-anisyl-4-nitrophenyliodonium triflate,<sup>1</sup> bis(4-anisyl)iodonium triflate.<sup>2</sup> Substantially the same procedures afforded the following previously unreported diaryliodonium triflates:

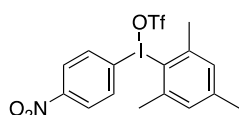

**a. Mesityl-4-nitrophenyliodonium triflate.** Solid *m*CPBA (90 % active oxidant, 242 mg, 1.25 mmol, 1.25 equiv) was added in one portion at RT to a CH<sub>2</sub>Cl<sub>2</sub> (2 mL) solution of 4-iodonitrobenzene (249 mg, 1.0 mmol), followed by dropwise addition of triflic acid (0.2 mL, 2.0 mmol, 2.0 equiv). The mixture was stirred for 10 min, then it was cooled to 0 °C. A CH<sub>2</sub>Cl<sub>2</sub> (1 mL) solution of mesitylene (0.15 mL, 1.1 mmol, 1.1 equiv) was added dropwise over 5 min and the mixture was stirred for 30 min while warming to RT. The solution was then concentrated under reduced pressure and the residue was taken up in Et<sub>2</sub>O and stirred for 30 min to allow full precipitation of the product, which was recovered by vacuum filtration (510 mg, 97%). This crude material was recrystallized by dissolving in the minimal volume of hot MeCN, followed by addition of excess cold Et<sub>2</sub>O. Mesityl-4-nitrophenyliodonium triflate was thus obtained as a white solid (450 mg, 87%), mp: 199-201 °C (dec.).

<sup>1</sup>H: 8.34 (ABq, 4 H, Δ<sub>ν</sub><sub>AB</sub> = 0.02, J<sub>AB</sub> = 9.2 Hz), 7.34 (s, 2 H), 2.73 (s, 6 H), 2.39 (s, 3 H). <sup>13</sup>C: 150.11, 144.94, 142.82, 135.36, 130.47, 126.52, 121.14, 118.20, 26.23, 20.14. **HRMS** (ESI): calcd for C<sub>15</sub>H<sub>15</sub>NO<sub>2</sub>I<sup>+</sup> ([M – TfO<sup>-</sup>]<sup>+</sup>): 368.0148; found 368.0143.

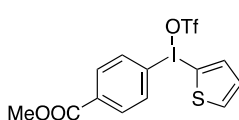

**b. 4-Carbomethoxyphenyl-2-thienyliodonium triflate.** Solid *m*-CPBA (70% active oxidant, 670 mg, 2.71 mmol, 1.0 equiv) was added in one portion at RT to a CH<sub>2</sub>Cl<sub>2</sub> (15 mL) solution of methyl-4-iodobenzoate (755 mg, 2.82 mmol, 1 equiv) followed by dropwise addition of trifluoromethanesulfonic acid (0.5 mL, 5.65 mmol, 2.0 equiv.). The mixture was stirred for at RT for 5 min and cooled to 0 °C. A solution of thiophene (0.25 mL, 3.12 mmol, 1.1 equiv.) in CH<sub>2</sub>Cl<sub>2</sub> (2 mL) was added dropwise over 5 min resulting in a dark green/blue mixture. The reaction was stirred at 0 °C for 5 min, then at r.t. for 3 h, and concentrated under reduced pressure to give a dark colored solid residue. This material was suspended in 10% acetone/Et<sub>2</sub>O (20 mL). The suspended solid was recovered by vacuum filtration and rinsed with Et<sub>2</sub>O to obtain crude 4-carbomethoxyphenyl-2-

<sup>1</sup> Bielawski, M.; Zhu, M.; Olofsson, B. *Adv. Synth. Catal.* **2007**, *349*, 2610 – 2618.

<sup>2</sup> Zhu, M.; Jalalian, N.; Olofsson, B. *Synlett*, **2008**, *4*, 592-596.

thienyliodonium triflate as a brown solid. The compound was dissolved in acetone (15 mL), suspended particles were removed by gravity filtration, and the filtrate was concentrated under reduced pressure. The solid residue of was recrystallized by dissolving in the minimal volume of hot MeCN, followed by addition of excess cold Et<sub>2</sub>O, to afford the title compound (576 mg, 41%) as a light brown, shiny solid, mp: 134-135°C (dec.).

**<sup>1</sup>H**: 8.45 (app d, *J* = 8.7 Hz, 2 H), 8.27 (dd, *J* = 3.9, 1.3 Hz, 1 H), 8.12 (app d, *J* = 8.7 Hz, 2 H), 8.06 (dd, *J* = 5.5, 1.3 Hz, 1 H), 7.29 (dd, *J* = 5.4, 3.9 Hz, 1 H), 3.92 (s, 3H). **<sup>13</sup>C**: 165.8, 143.1, 139.5, 135.8, 134.7, 133.3, 131.0, 122.6, 97.1, 53.0. **HRMS** (ESI): calcd for C<sub>15</sub>H<sub>15</sub>NO<sub>2</sub>I<sup>+</sup> ([M – TfO<sup>-</sup>]<sup>+</sup>): 344.9446; found 344.9449.

### 3. General Procedure for Melt Metathesis Reactions.

The aryl iodide (0.5 mmol, 5 equiv.) was combined with diphenyliodonium triflate (0.1 mmol) in a 0.2 mL microwave vial, which was then sealed with a crimped cap. The mixture was heated at 120 °C (oil bath temperature) for 24h, then it was cooled to r.t. The crude material was purified by flash chromatography (gradient 10 → 40% acetone/ CH<sub>2</sub>Cl<sub>2</sub>).

#### Results of melt metathesis reactions of Ph<sub>2</sub>IOTf

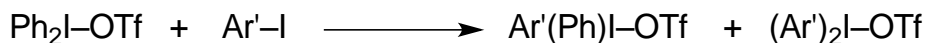**A****B****C**

a. Ar'-I = 4-Me-C<sub>6</sub>H<sub>4</sub>: ratio **B** : **C** : **A** = 1.0:2.3:1.5 (60% yield)

b. Ar'-I = 4-MeO-C<sub>6</sub>H<sub>4</sub>: ratio **B** : **C** : **A** = 3.5:1.3:1.0 (82% yield)

#### a. Melt metathesis between Ph<sub>2</sub>IOTf and 4-iodotoluene

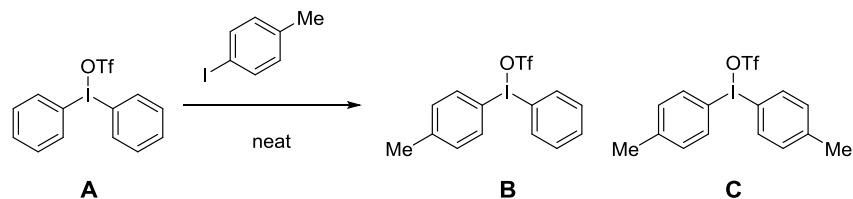

4-iodotoluene (109 mg, 0.5 mmol) and Ph<sub>2</sub>IOTf (43 mg, 0.1 mmol) combined to afford 60% (27 mg) of a mixture of **A**, **B**, and **C**.

<sup>1</sup>H: diphenyliodonium triflate (**A**): 8.34 (app dd, *J* = 8.6, 1.0 Hz, 4 H), 7.74 (app tt, *J* = 7.5, 1.7 Hz, 2 H), 7.59 (app t, *J* = 7.9 Hz, 4 H).

4-tolyl-phenyliodonium triflate (**B**): 8.34-8.28 (m, 2 H), 8.24-8.19 (m, 2 H), 7.76-7.70 (m, 1 H), 7.64-7.60 (m, 2 H), 7.43-7.37 (m, 2 H), 2.40 (s, 3 H).

bis-(4-tolyl)iodonium triflate (**C**): 8.18 (app d, *J* = 8.5 Hz, 4 H), 7.39 (app d, *J* = 8.0 Hz, 4 H), 2.40 (s, 6 H).

<sup>13</sup>C: 144.6, 144.5, 136.51, 136.48, 136.32, 136.29, 133.7, 133.6, 133.5, 133.4, 133.00, 132.95, 124.2, 120.0, 115.3, 111.8, 21.3.

#### b. Melt metathesis between Ph<sub>2</sub>IOTf and 4-iodoanisole (Entry 1b)

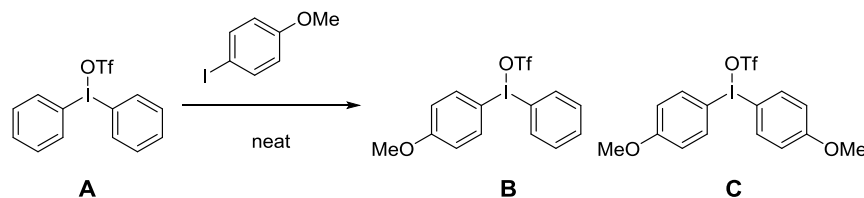

4-iodoanisole (117 mg, 0.5 mmol) and Ph<sub>2</sub>IOTf (43 mg, 0.1 mmol) combined to afford 82% (38 mg) of a mixture of **A**, **B**, and **C**.

<sup>1</sup>H: diphenyliodonium triflate (**A**): 8.34 (m, 4 H), 7.77-7.70 (m, 2 H), 7.63-7.53 (m, 4 H).

4-anisyl-phenyliodonium triflate (**B**): 8.31-8.24 (m, 4 H), 7.72 (app tt, app  $J = 7.3, 1.5$  Hz, 1 H), 7.61-7.53 (m, 2 H), 7.11 (app d,  $J = 9.3$  Hz, 2 H), 3.87 (s, 3 H).

bis-(4-anisyl)iodonium triflate (**C**): 8.22 (app d,  $J = 9.2$  Hz, 4 H), 7.10 (app d,  $J = 9.2$  Hz, 4 H), 3.86 (s, 6 H).

$^{13}\text{C}$ : 164.0, 163.8, 138.7, 138.2, 136.5, 136.0, 133.5, 133.3, 133.0, 132.9, 124.2, 120.0, 118.7, 118.6, 115.3, 115.2, 104.3, 103.5, 56.3.



#### 4. General Procedure for Solution Metathesis Reactions

A 15 mL heavy walled pressure tube equipped with a screw-cap seal was charged with the aryl iodide (5 equiv), the iodonium triflate in 0.5 mL 1,2-dichloroethane (0.2M in iodonium triflate). The tube was sealed with a screw cap and immersed in an oil bath maintained at 125 °C. Heating was continued for the specified time, then the mixture was cooled to RT and concentrated under reduced pressure. The crude product was purified by silica gel flash chromatography (gradient 10 → 40% acetone/ CH<sub>2</sub>Cl<sub>2</sub>).

**Note:** in the procedures that follow, compounds are numbered as Entry 1a, 2c, 3f, etc., to indicate that, in the main body of the paper, the substance in question is found in Table 1, entry a; or Table 2, entry c; or Table 3, entry f; etc.

##### a. Solution metathesis between Ph<sub>2</sub>IOTf and 4-iodotoluene (Entry 1a)

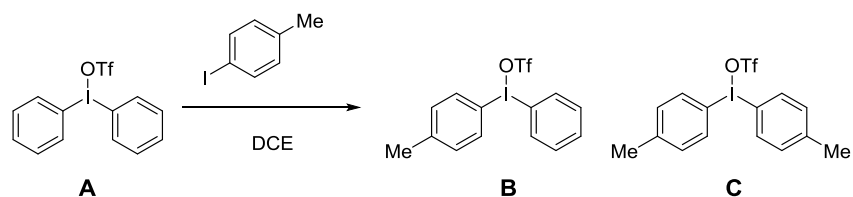

4-iodotoluene (109 mg, 0.5 mmol) and Ph<sub>2</sub>IOTf (43 mg, 0.1 mmol) combined and stirred for 24h to afford 48% (22 mg) of a mixture of products.

<sup>1</sup>H: phenyl-4-tolyliodonium triflate (B): 8.31 (app d, *J* = 7.8 Hz, 2 H), 8.24-8.19 (m, 2 H), 7.74 (app t, *J* = 7.5 Hz, 1 H), 7.59 (app t, *J* = 7.9 Hz, 2 H), 7.44-7.40 (m, 2 H), 2.41 (s, 3 H).

bis-(4-tolyl)iodonium triflate (C): 8.18 (app d, *J* = 8.4 Hz, 4 H), 7.40 (app d, *J* = 8.3 Hz, 4 H), 2.41 (s, 6 H).

<sup>13</sup>C: 144.51, 144.47, 136.5, 136.31, 136.28, 133.7, 133.6, 133.4, 133.0, 111.88, 111.85, 21.3.

##### b. Solution metathesis between Ph<sub>2</sub>IOTf and 4-iodoanisole (Entry 1b)

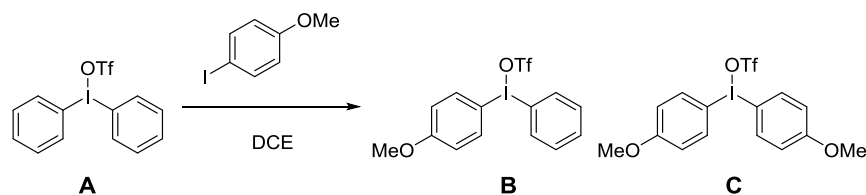

4-iodoanisole (117 mg, 0.5 mmol) and Ph<sub>2</sub>IOTf (43 mg, 0.1 mmol) combined and stirred for 25h to afford 80% (37 mg) of a mixture of products.

<sup>1</sup>H: 4-anisyl-phenyliodonium triflate (B): 8.32-8.24 (m, 4 H), 7.74 (app t, *J* = 7.5 Hz, 1 H), 7.59 (app t, *J* = 7.9 Hz, 2 H), 7.16-7.11 (m, 2 H), 3.88 (s, 3 H).

bis-(4-anisyl)iodonium triflate (C): 8.23 (app d, *J* = 9.2 Hz, 4 H), 7.11 (app d, *J* = 9.2 Hz, 4 H), 3.88 (s, 6 H).

$^{13}\text{C}$ : 163.9, 163.8, 138.7, 138.2, 136.5, 136.0, 133.5, 133.2, 133.0, 132.9, 124.2, 119.9, 118.7, 118.5, 115.9, 104.4, 103.6, 56.2.

### c. Solution metathesis between $\text{Ph}_2\text{IOTf}$ and 1-iodonaphthalene (Entry 1c)

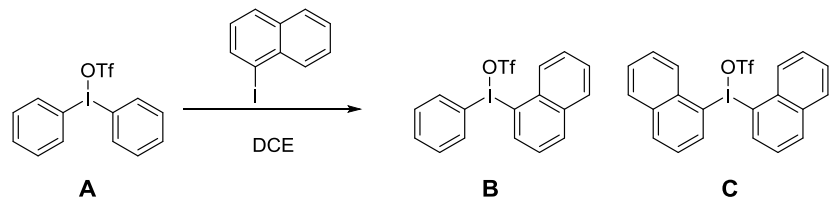

1-iodonaphthalene (73  $\mu\text{L}$ , 0.5 mmol) and  $\text{Ph}_2\text{IOTf}$  (43 mg, 0.1 mmol) combined and stirred for 26h to afford 14% (7 mg) of a mixture of products.

$^1\text{H}$ : 1-naphthyl-phenyliodonium triflate (**B**): 8.88 (d,  $J = 7.5$  Hz, 1 H), 8.41-8.31 (m, 4 H), 8.10 (d,  $J = 8.1$  Hz, 1 H), 7.85 (app t,  $J = 8.2$  Hz, 1 H), 7.80-7.57 (m, 3 H), 7.53 (app t,  $J = 7.6$  Hz, 2 H).

bis-(1-naphthyl)iodonium triflate (**C**): 8.93 (d,  $J = 7.5$  Hz, 2 H), 8.53 (d,  $J = 8.5$  Hz, 2 H), 8.28 (d,  $J = 8.2$  Hz, 2 H), 8.04 (d,  $J = 8.3$  Hz, 2 H), 7.85 (app t,  $J = 8.2$  Hz, 2 H), 7.75-7.58 (m, 4 H).

$^{13}\text{C}$ : 139.3, 139.0, 138.0, 136.5, 136.0, 135.9, 135.3, 135.0, 133.5, 133.3, 133.1, 133.0, 132.5, 131.0, 130.9, 130.61, 130.55, 129.7, 129.6, 129.15, 129.07, 128.6, 128.5, 124.2, 118.2, 115.2.

### d. Solution metathesis between 4-carbomethoxyphenyl-phenyliodonium triflate and iodobenzene (Entry 2a)

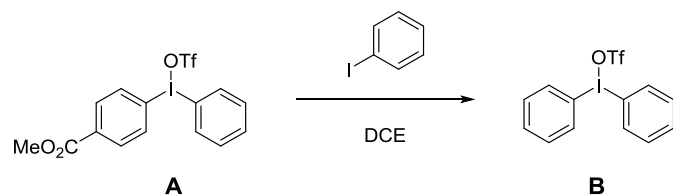

Iodobenzene (56  $\mu\text{L}$ , 0.5 mmol) and 4-carbomethoxyphenyl-phenyliodonium triflate (49 mg, 0.1 mmol) combined and stirred for 15h to afford 51% (22 mg) of a mixture of products.

$^1\text{H}$ : 4-carbomethoxyphenyl -phenyliodonium triflate (**A**): 8.46 (app d,  $J = 8.7$  Hz, 2 H), 8.11 (app d,  $J = 8.7$  Hz, 2 H), 3.91 (s, 3 H).

diphenyliodonium triflate (**B**): 8.38-8.31 (m, 4 H), 7.75 (tt,  $J = 7.5, 1.1$  Hz, 2 H), 7.60 (app t,  $J = 7.9$  Hz, 4 H).  $^{13}\text{C}$ : 136.5, 133.5, 133.0, 115.3.

### e. Solution metathesis between 4-carbomethoxyphenyl-phenyliodonium triflate and 4-iodotoluene (Entry 2b)

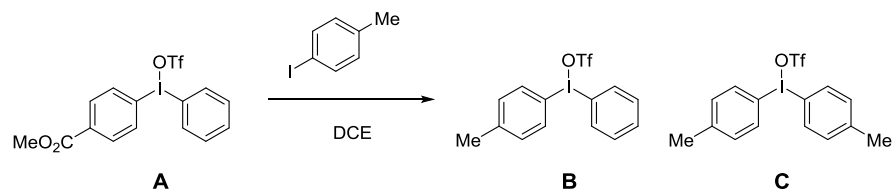

4-iodotoluene (109 mg, 0.5 mmol) and 4-carbomethoxyphenyl-phenyliodonium triflate (49 mg, 0.1 mmol) combined and stirred

for 15h to afford 59% (27 mg) of a mixture of products.

<sup>1</sup>H: phenyl-4-tolyliodonium triflate (**B**): 8.31 (app dd,  $J = 8.4, 1.0$  Hz, 2 H), 8.24-8.18 (m, 2 H), 7.74 (app tt,  $J = 7.4, 1.1$  Hz, 1 H), 7.59 (app t,  $J = 7.9$  Hz, 2 H), 7.43-7.38 (m, 2 H), 2.40 (s, 3 H).

bis-(4-tolyl)iodonium triflate (**C**): 8.18 (app d,  $J = 8.5$  Hz, 4 H), 7.39 (app d,  $J = 8.5$  Hz, 4 H), 2.40 (s, 6 H).

<sup>13</sup>C: 144.6, 144.5, 136.5, 136.3, 133.71, 133.65, 133.4, 133.0, 128.5, 124.2, 120.0, 115.4, 111.7, 111.6, 21.3.

### f. Solution metathesis between 4-carbomethoxyphenyl-phenyliodonium triflate and 4-iodoanisole (Entry 2c)

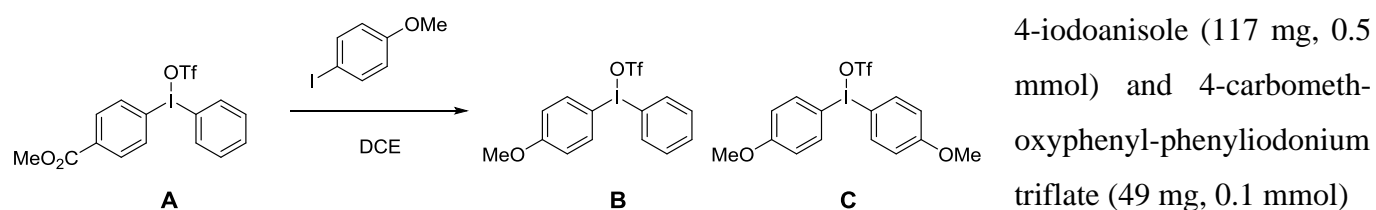

combined and stirred for 15h to afford 80% (38 mg) of a mixture of products.

<sup>1</sup>H: 4-carbomethoxyphenyl-phenyliodonium triflate (**A**): 8.40 (app d,  $J = 8.7$  Hz, 2 H), 8.33-8.26 (m, 2H), 7.76-7.71 (m, 1 H), 7.63-7.58 (m, 2 H), 8.09 (app d,  $J = 8.7$  Hz, 2 H), 3.91 (s, 3 H).

4-anisyl-phenyliodonium triflate (**B**): 8.34-8.22 (m, 4 H), 7.72 (tt,  $J = 7.4, 1.1$  Hz, 1 H), 7.58 (app t,  $J = 7.9$  Hz, 2 H), 7.16-7.10 (m, 2 H), 3.88 (s, 3 H).

bis-(4-anisyl)iodonium triflate (**C**): 8.22 (app d,  $J = 9.2$  Hz, 4 H), 7.10 (app d,  $J = 9.3$  Hz, 4 H), 3.87 (s, 6 H).

<sup>13</sup>C: 165.9, 164.0, 163.8, 134.0, 138.7, 138.2, 136.1, 136.0, 133.3, 133.1, 132.9, 124.2, 120.3, 119.9, 118.8, 118.7, 118.6, 115.8, 104.3, 103.5, 56.3, 53.0.

### g. Solution metathesis between 4-carbomethoxyphenyl-phenyliodonium triflate and 1-iodonaphthalene (Entry 2d)

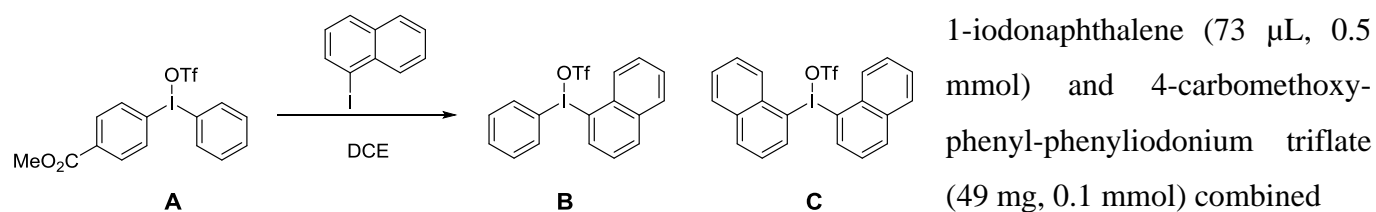

and stirred for 24h to afford 35% (38 mg) of a mixture of products.

<sup>1</sup>H: 4-carbomethoxyphenyl-phenyliodonium triflate (**A**): 8.44 (app d,  $J = 8.7$  Hz, 2 H), 8.41-8.35 (m, 2 H), 8.05-7.99 (m, 2 H), 7.74-7.67 (m, 1 H), 7.51 (app t,  $J = 7.9$  Hz, 2 H).

1-naphthyl-phenyliodonium triflate (**B**): 8.88 (dd,  $J = 7.6, 0.8$  Hz, 1 H), 8.41-8.30 (m, 4 H), 8.09 (d,  $J = 8.1$  Hz, 1 H), 7.85 (ddd,  $J = 8.2, 7.2, 1.1$  Hz, 1 H), 7.78-7.57 (m, 3 H), 7.51 (app t,  $J = 7.9$  Hz, 2 H).

bis-(1-naphthyl)iodonium triflate (**C**): 8.93 (dd,  $J = 7.5, 0.8$  Hz, 2 H), 8.53 (d,  $J = 8.5$  Hz, 2 H), 8.26 (d,  $J = 8.2$  Hz, 2 H), 8.02 (app d,  $J = 7.8$  Hz, 2 H), 7.85 (ddd,  $J = 8.2, 7.2, 1.1$  Hz, 2 H), 7.75-7.58 (m, 4 H).

$^{13}\text{C}$ : 165.8, 139.3, 139.0, 136.0, 135.9, 135.3, 135.0, 133.3, 133.0, 132.4, 131.0, 130.9, 130.6, 130.5, 129.58, 129.56, 129.1, 129.0, 128.6, 128.5, 124.3, 120.0, 118.0, 115.0.

#### h. Solution metathesis between 4-nitrophenyl-phenyliodonium triflate and iodobenzene (Entry 3a)

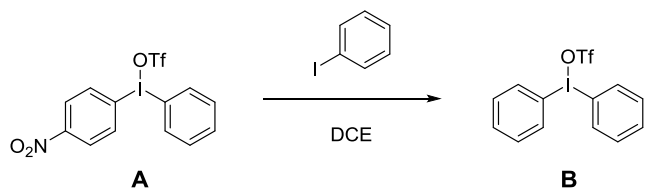

Iodobenzene (56  $\mu\text{L}$ , 0.5 mmol) and 4-nitrophenyl-phenyliodonium triflate (48 mg, 0.1 mmol) combined and stirred for 12h to afford 65% (28 mg) of a mixture of products.

$^1\text{H}$ : 4-nitrophenyl-phenyliodonium triflate (**A**): 8.61 (app d,  $J = 9.1$  Hz, 2 H), 8.38-8.33 (m, 4 H), 7.82-7.72 (m, 1 H), 7.67-7.57 (m, 2 H).

diphenyliodonium triflate (**B**): 8.34 (app dd,  $J = 8.3, 1.1$  Hz, 4 H), 7.75 (tt,  $J = 7.4, 1.0$  Hz, 2 H), 7.59 (app t,  $J = 7.9$  Hz, 4 H).

$^{13}\text{C}$ : 137.8, 136.9, 136.1, 133.8, 133.3, 133.2, 128.5, 127.2, 124.2, 119.9, 115.9, 115.3.

#### i. Solution metathesis between 4-nitrophenyl-phenyliodonium triflate and 4-iodotoluene (Entry 3b)

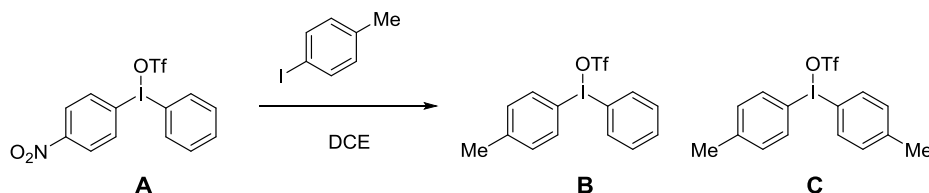

4-iodotoluene (109 mg, 0.5 mmol) and 4-nitrophenyl-phenyliodonium triflate (48 mg, 0.1 mmol) combined and

stirred for 12h to afford 73% (33 mg) of a mixture of products.

$^1\text{H}$ : phenyl-4-tolylidonium triflate (**B**): 8.34-8.27 (m, 2 H), 8.24-8.18 (m, 2 H), 7.73 (tt,  $J = 7.5, 1.0$  Hz, 1 H), 7.58 (app t,  $J = 7.9$  Hz, 2 H), 7.43-7.37 (m, 2 H), 2.40 (s, 3 H).

bis-(4-tolyl)iodonium triflate (**C**): 8.18 (app d,  $J = 8.5$  Hz, 4 H), 7.39 (app d,  $J = 8.3$  Hz, 4 H), 2.40 (s, 6 H).

$^{13}\text{C}$ : 144.6, 144.5, 136.5, 136.32, 136.29, 133.7, 133.6, 133.4, 133.0, 124.2, 112.0, 115.4, 111.7, 111.5, 21.6.

**j. Solution metathesis between 4-nitrophenyl-phenyliodonium triflate and 4-iodoanisole (Entry 3c)**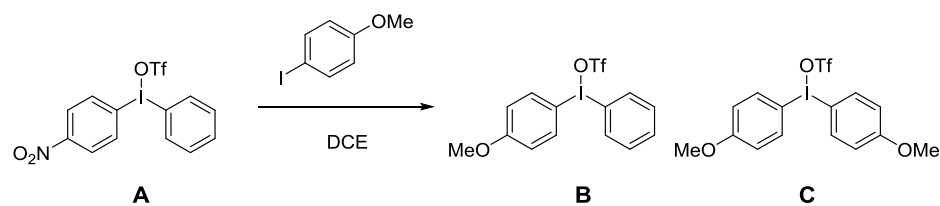

4-iodoanisole (117 mg) and 4-nitrophenyl-phenyliodonium triflate (48 mg, 0.1 mmol) combined and stirred for 12h

to afford 76% (36 mg) of a mixture of products.

<sup>1</sup>H: 4-anisyl-phenyliodonium triflate (B): 8.31-8.23 (m, 4 H), 7.72 (tt,  $J = 7.4, 1.1$  Hz, 1 H), 7.76 (app t,  $J = 7.9$  Hz, 2 H), 7.12 (app d,  $J = 9.2$  Hz, 2 H), 3.88 (s, 3 H).

bis-(4-anisyl)iodonium triflate (C): 8.22 (app d,  $J = 9.2$  Hz, 4 H), 7.09 (app d,  $J = 9.2$  Hz, 4 H), 3.87 (s, 6 H).

<sup>13</sup>C: 164.0, 163.8, 138.7, 138.2, 136.0, 133.3, 132.9, 124.2, 112.0, 118.7, 118.6, 115.8, 104.3, 103.5, 56.3.

**k. Solution metathesis between 4-nitrophenyl-phenyliodonium triflate and 1-iodonaphthalene (Entry 3d)**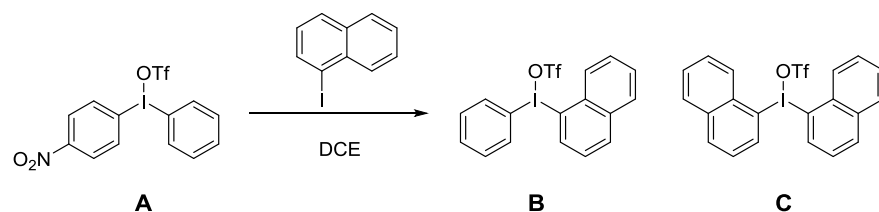

1-iodonaphthalene (73  $\mu$ L, 0.5 mmol) and 4-nitrophenyl-phenyliodonium triflate (48 mg, 0.1 mmol) combined and stirred for

12h to afford 59% (29 mg) of a mixture of products

<sup>1</sup>H: 1-naphthyl-phenyliodonium triflate (B): 8.88 (dd,  $J = 7.5, 1.0$  Hz, 1 H), 8.40-8.30 (m, 4 H), 8.08 (app dd,  $J = 8.2, 1.1$  Hz, 1 H), 7.84 (ddd,  $J = 8.3, 7.0, 1.3$  Hz, 1 H), 7.78-7.57 (m, 3 H), 7.51 (app t,  $J = 7.8$  Hz, 2 H).

bis-(1-naphthyl)iodonium triflate (C): 8.94 (dd,  $J = 7.6, 1.0$  Hz, 2 H), 8.52 (app dd,  $J = 8.5, 0.6$  Hz, 2 H), 8.25 (d,  $J = 8.2, 2$  H), 8.01 (d,  $J = 8.2$  Hz, 2 H), 7.84 (ddd,  $J = 8.3, 7.0, 1.3$  Hz, 2 H), 7.75-7.58 (m, 4 H).

<sup>13</sup>C: 139.3, 139.0, 137.2, 136.5, 136.0, 135.9, 135.3, 135.0, 133.5, 133.3, 133.0, 132.9, 132.4, 131.0, 130.9, 130.6, 130.5, 129.6, 129.5, 129.1, 129.0, 128.6, 128.5, 124.3, 120.0, 118.0, 115.04, 115.00.

**l. Solution metathesis between 4-anisyl-4-nitrophenyliodonium triflate and iodobenzene (Entry 3e)**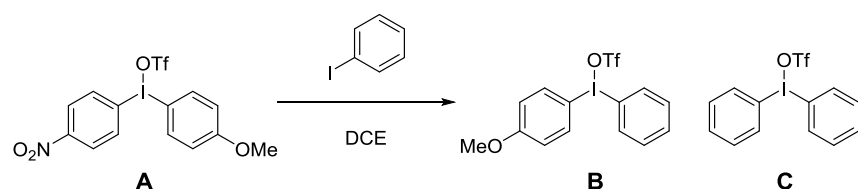

Iodobenzene (56  $\mu$ L, 0.5 mmol) and 4-anisyl-4-nitrophenyliodonium triflate (50 mg, 0.1 mmol) combined and stirred for 12h to afford 60% (27

mg) of a mixture of products.

<sup>1</sup>H: 4-anisyl-phenyliodonium triflate (**A**): 8.29 (app dd,  $J = 8.4, 1.0$  Hz, 2 H), 8.27 (app d,  $J = 9.2$  Hz, 2 H), 7.72 (tt,  $J = 7.1, 1.2$  Hz, 1 H), 7.58 (app t,  $J = 7.4$  Hz, 2 H), 7.12 (app d,  $J = 9.3$  Hz, 2 H), 3.88 (s, 3 H).

diphenyliodonium triflate (**C**): 8.34 (app dd,  $J = 8.5, 1.0$  Hz, 4 H), 7.75 (tt,  $J = 7.3, 1.1$  Hz, 2 H), 7.60 (app t,  $J = 7.8$  Hz, 4 H).

<sup>13</sup>C: 164.0, 139.2, 138.7, 138.2, 137.2, 136.5, 136.0, 133.5, 133.3, 133.0, 132.9, 128.5, 127.1, 124.2, 120.0, 118.9, 118.7, 118.6, 115.9, 115.3, 104.3, 103.5, 56.3.

### m. Solution metathesis between 4-anisyl-4-nitrophenyliodonium triflate and 4-iodotoluene (Entry 3f)

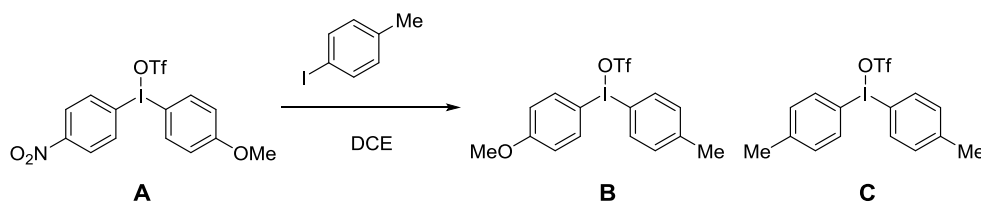

4-iodotoluene (109 mg, 0.5 mmol) and 4-anisyl-4-nitrophenyliodonium triflate (50 mg, 0.1 mmol)

combined and stirred for 12h to afford 79% (37 mg) of a mixture of products.

<sup>1</sup>H: 4-anisyl-4-tolylphenyliodonium triflate (**B**): 8.24 (app d,  $J = 9.2$  Hz, 2 H), 8.16 (app d,  $J = 8.5$  Hz, 2 H), 7.38 (app d,  $J = 8.7$  Hz, 2 H), 7.11 (app d,  $J = 9.2$  Hz, 2 H), 3.87 (s, 3 H).

bis-(4-tolyl)iodonium triflate (**C**): 8.18 (app d,  $J = 8.4$  Hz, 4 H), 7.39 (app d,  $J = 8.6$  Hz, 4 H), 3.87 (s, 6 H).

<sup>13</sup>C: 163.9, 144.5, 144.4, 138.5, 138.2, 136.3, 136.0, 133.64, 133.57, 124.2, 120.0, 118.64, 118.56, 112.2, 111.8, 103.8, 56.3, 21.3.

### n. Solution metathesis between 4-anisyl-4-nitrophenyliodonium triflate and 4-iodoanisole (Entry 3g)

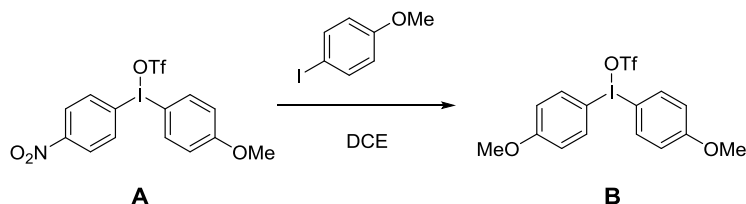

4-iodoanisole (117 mg, 0.5 mmol) and 4-anisyl-4-nitrophenyliodonium triflate (50 mg, 0.1 mmol) combined and stirred for 12h to afford 89% (44 mg) of a mixture of products.

<sup>1</sup>H: 4-anisyl-4-nitrophenyliodonium triflate (**A**): 8.55 (app d,  $J = 9.2$  Hz, 2 H), 8.33 (app dd,  $J = 9.2, 1.5$  Hz, 4 H), 7.17-7.08 (m, 2 H), 3.88 (s, 3 H).

bis-(4-anisyl)iodonium triflate (**B**): 8.22 (app d,  $J = 9.2$  Hz, 4 H), 7.09 (app d,  $J = 9.2$  Hz, 4 H), 3.86 (s, 6 H).

$^{13}\text{C}$ : 164.2, 163.8, 150.9, 139.1, 138.61, 138.58, 137.83, 137.79, 137.2, 130.3, 128.4, 127.1, 124.2, 121.8, 119.9, 119.0, 118.9, 118.13, 118.07, 115.7, 104.0, 56.3, 55.5.

**o. Solution metathesis between 4-anisyl-4-nitrophenyliodonium triflate and 1-iodonaphthalene (Entry 3h)**

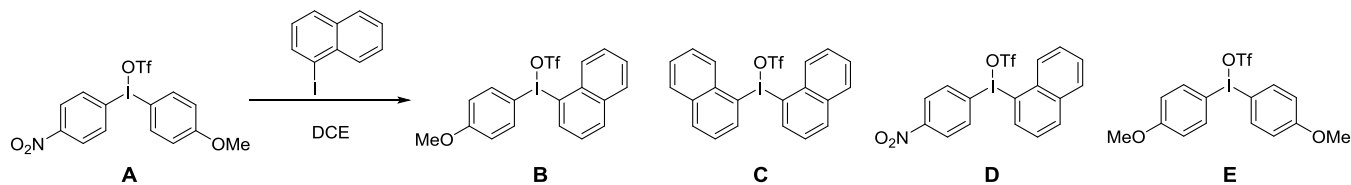

1-iodonaphthalene (73  $\mu\text{L}$ , 0.5 mmol) and 4-anisyl-4-nitrophenyliodonium triflate (50 mg, 0.1 mmol) combined and stirred for 12h to afford 64% (29 mg) of a mixture of products.

$^1\text{H}$ : 4-anisyl-4-nitrophenyliodonium triflate (**A**): 8.54 (app d,  $J = 9.1$  Hz, 2 H), 8.39-8.33 (m, 4 H), 7.14 (app d,  $J = 9.2$  Hz, 2 H), 3.88 (s, 3 H).

4-anisyl-1-naphthylidonium triflate (**B**): 8.84 (dd,  $J = 7.5, 0.9$  Hz, 1 H), 8.39 (app dd,  $J = 8.5, 0.7$  Hz, 1 H), 8.32 (app d,  $J = 8.0$  Hz, 1 H), 8.28 (app d,  $J = 9.2$  Hz, 2 H), 8.07 (d,  $J = 8.1$  Hz, 1 H), 7.85 (ddd,  $J = 8.3, 7.0, 1.3$  Hz, 1 H), 7.73 (ddd,  $J = 8.1, 7.0, 1.0$  Hz, 1 H), 7.66 (app t,  $J = 7.9$ , 1 H), 7.02 (app d,  $J = 9.2$  Hz, 2 H), 3.79 (s, 3 H).

bis-(1-naphthyl)iodonium triflate (**C**): 8.94 (dd,  $J = 7.6, 1.0$  Hz, 2 H), 8.52 (app d,  $J = 8.3$  Hz, 2 H), 8.31-8.26 (m, 2 H), 8.01 (d,  $J = 8.3$  Hz, 2 H), 7.85 (ddd,  $J = 8.3, 7.0, 1.3$  Hz, 2 H), 7.76-7.59 (m, 4 H).

bis-(4-anisyl)iodonium triflate (**D**): 8.22 (app d,  $J = 9.3$  Hz, 4 H), 7.09 (app d,  $J = 9.2$  Hz, 4 H), 3.86 (s, 6 H).

1-naphthyl-4-nitrophenyliodonium triflate (**E**): 8.94 (dd,  $J = 7.5, 1.0$  Hz, 1 H), 8.58 (app d,  $J = 9.2$  Hz, 2 H), 8.42-8.25 (m, 4 H), 8.12-8.07 (m, 1 H), 7.89-7.63 (m, 3 H).

$^{13}\text{C}$ : 164.2, 163.8, 150.9, 139.8, 139.1, 139.0, 138.8, 137.2, 136.0, 135.9, 135.8, 135.6, 135.04, 135.01, 132.4, 132.2, 131.2, 130.9, 130.6, 130.54, 130.50, 129.6, 129.5, 129.2, 129.0, 129.0, 128.7, 128.51, 128.47, 127.14, 127.12, 124.2, 121.8, 120.0, 118.9, 118.7, 118.0, 115.8, 104.3, 103.9, 103.4, 56.3, 56.2.

**p. Solution metathesis between mesityl-4-nitrophenyliodonium triflate and 4-iodotoluene (Entry 3i)**

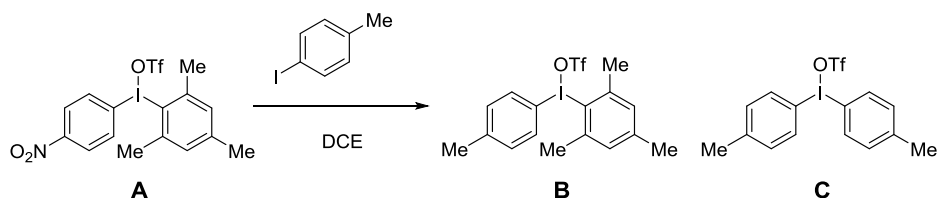

4-iodotoluene (109 mg, 0.5 mmol) and mesityl-4-nitrophenyliodonium triflate (52 mg, 0.1 mmol) combined

and stirred for 12h to afford 26% (12 mg) of a mixture of products.

<sup>1</sup>H: mesityl-4-tolyliodonium triflate (**B**): 7.96 (app d,  $J = 8.5$  Hz, 2 H), 7.43-7.36 (m, 2 H), 7.26 (s, 2 H), 2.71 (s, 6 H), 2.41 (s, 3 H), 2.35 (s, 3 H).

bis-(4-tolyl)iodonium triflate (**C**): 8.18 (app d,  $J = 8.5$  Hz, 4 H), 7.40 (app d,  $J = 8.4$  Hz, 4 H), 2.41 (s, 6 H).

<sup>13</sup>C: 144.6, 143.3, 136.3, 135.3, 133.8, 133.7, 131.1, 124.3, 120.0, 111.8, 27.1, 21.3.

### q. Solution metathesis between mesityl-4-nitrophenyliodonium triflate and 4-iodoanisole (Entry 3j)

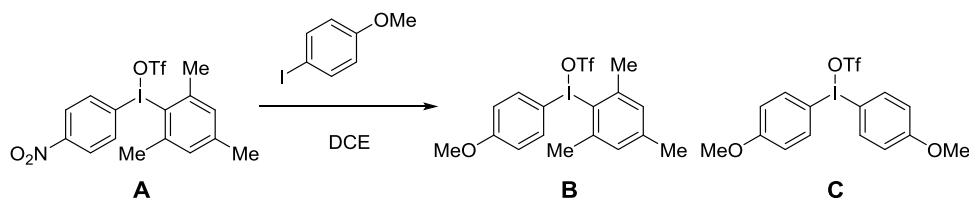

4-iodoanisole (117 mg, 0.5 mmol) and mesityl-4-nitrophenyliodonium triflate (52 mg, 0.1 mmol) combined

and stirred for 12h to afford 37% (18 mg) of a mixture of products.

<sup>1</sup>H: 4-anisyl-mesityl-iodonium triflate (**B**): 8.03 (app d,  $J = 9.2$  Hz, 2 H), 7.25 (s, 2 H), 7.16-7.08 (m, 2 H), 3.87 (s, 3 H), 2.72 (s, 6 H), 2.34 (s, 3 H).

bis-(4-anisyl)iodonium triflate: 8.22 (app d,  $J = 9.2$  Hz, 4 H), 7.10 (app d,  $J = 9.1$  Hz, 4 H), 3.87 (s, 6 H).

<sup>13</sup>C: 162.8, 142.1, 137.2, 136.6, 130.0, 123.2, 119.0, 117.7, 117.6, 103.4, 55.3, 26.0, 19.9.

### r. Solution metathesis between mesityl-4-nitrophenyliodonium triflate and 1-iodonaphthalene (Entry 3k)

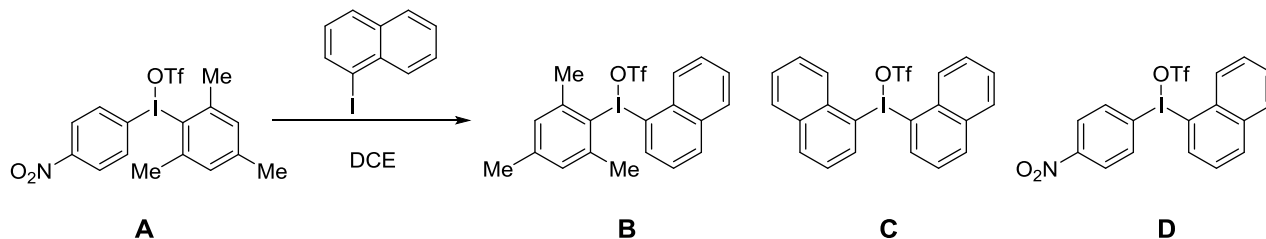

1-iodonaphthalene (73  $\mu$ L, 0.5 mmol) and mesityl-4-nitrophenyliodonium triflate (52 mg, 0.1 mmol) combined and stirred for 12h to afford 27% (14 mg) of a mixture of products.

<sup>1</sup>H: mesityl-4-nitrophenyliodonium triflate (**A**): 8.37-8.29 (m, 4 H), 7.32 (s, 2 H), 2.71 (s, 6 H), 2.38 (s, 3 H).

bis-(1-naphthyl)iodonium triflate (**C**): 8.93 (dd,  $J = 7.5, 0.8$  Hz, 2 H), 8.53 (d,  $J = 8.3$  Hz, 2 H), 8.31-8.26 (m, 2 H), 8.04 (d,  $J = 8.1$  Hz, 2 H), 7.85 (ddd,  $J = 8.3, 7.1, 1.2$  Hz, 2 H), 7.72 (app ddd,  $J = 8.0, 7.3, 0.7$  Hz, 2 H), 7.62 (t,  $J = 7.8, 2$  H).



mesityl-1-naphthylidonium triflate (**B**) and 4-nitrophenyl-1-naphthylidonium triflate (**D**) were only detected through LC-MS and peak assignments for  $^1\text{H}$  NMR was not possible.

$^{13}\text{C}$ : 145.6, 143.6, 143.5, 138.9, 136.16, 136.14, 135.9, 135.0, 132.5, 131.3, 130.9, 130.5, 129.6, 129.1, 128.5, 127.3, 124.2, 122.6, 119.9, 119.8, 118.1, 55.5, 27.1, 21.0.

**s. Solution metathesis between 4-carbomethoxyphenyl-2-thienyliodonium triflate and iodobenzene (Entry 4a)**

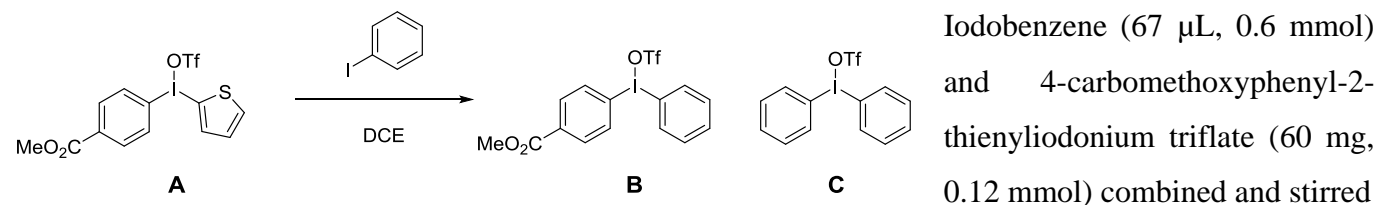

for 12h to afford 40% (21 mg) of a mixture of products.

$^1\text{H}$ : 4-carbomethoxyphenyl-phenyliodonium triflate (**B**): 8.46 (app d,  $J = 8.7$  Hz, 2 H), 8.40-8.34 (m, 2 H), 8.10 (app d,  $J = 8.6$  Hz, 2 H), 7.81-7.74 (m, 1 H), 7.64-7.58 (m, 2 H).

diphenyliodonium triflate (**C**): 8.34 (app dd,  $J = 8.6, 1.1$  Hz, 4 H), 7.75 (tt,  $J = 7.4, 1.1$  Hz, 2 H), 7.60 (app t,  $J = 7.9$  Hz, 4 H).

$^{13}\text{C}$ : 136.5, 133.5, 133.0, 124.3, 120.0, 115.3.

**t. Solution metathesis between 4-carbomethoxyphenyl-2-thienyliodonium triflate and 4-iodotoluene (Entry 4b)**

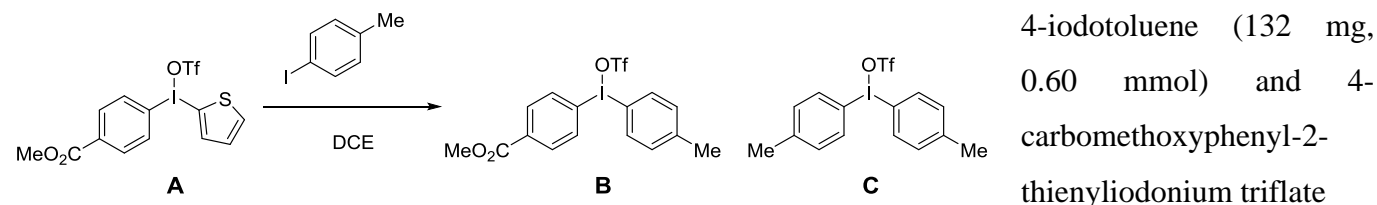

(60 mg, 0.12 mmol) combined and stirred for 12h to afford 66% (37 mg) of a mixture of products.

$^1\text{H}$ : 4-carbomethoxyphenyl-4-tolylidonium triflate (**B**): 8.42 (app d,  $J = 8.7$  Hz, 2 H), 8.23 (app d,  $J = 8.6$  Hz, 2 H), 8.08 (app d,  $J = 8.6$  Hz, 2 H), 7.43-7.37 (m, 2 H), 3.90 (s, 3 H).

bis-(4-tolyl)iodonium triflate (**C**): 8.18 (app d,  $J = 8.5$  Hz, 4 H), 7.38 (app d,  $J = 8.3$  Hz, 4 H), 2.39 (s, 6 H).

$^{13}\text{C}$ : 136.7, 136.4, 136.3, 133.8, 133.6, 133.1, 124.2, 119.9, 111.8, 53.0, 21.3.

**u. Solution metathesis between 4-carbomethoxyphenyl-2-thienyliodonium triflate and 4-iodoanisole (Entry 4c)**

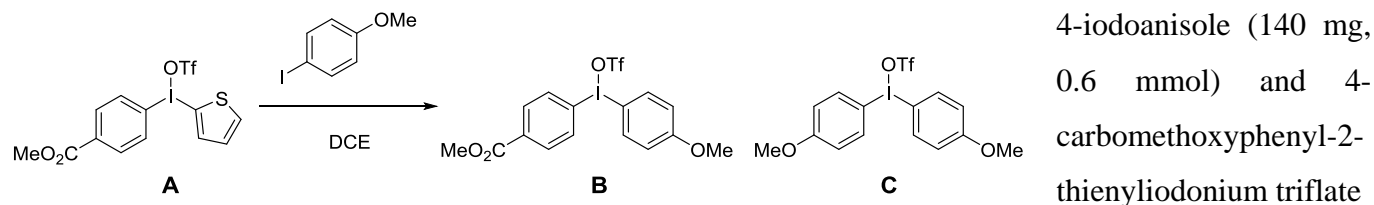

(60 mg, 0.12 mmol) combined and stirred for 12h to afford 91% (55 mg) of a mixture of products.

<sup>1</sup>H: 4-carbomethoxyphenyl-4-anisyl-2-thienyliodonium triflate (**B**): 8.39 (app d,  $J = 8.7$  Hz, 2 H), 8.29 (app d,  $J = 9.2$  Hz, 2 H), 8.07 (app d,  $J = 8.7$  Hz, 2 H), 7.12 (app d,  $J = 9.3$  Hz, 2 H), 3.90 (s, 3 H), 3.87 (s, 3 H).

bis-(4-anisyl)iodonium triflate (**C**): 8.21 (app d,  $J = 9.2$  Hz, 4 H), 7.09 (app d,  $J = 9.2$  Hz, 4 H), 3.86 (s, 6 H).

<sup>13</sup>C: 165.9, 164.0, 163.8, 142.8, 141.8, 139.1, 138.9, 138.4, 138.2, 138.0, 136.1, 135.8, 134.3, 133.1, 130.8, 130.6, 128.3, 124.1, 120.5, 119.8, 118.8, 118.53, 118.48, 115.6, 104.4, 103.7, 98.7, 56.3, 56.2, 53.0.

**v. Solution metathesis between 4-carbomethoxyphenyl-2-thienyliodonium triflate and 1-iodonaphthalene (Entry 4d)**

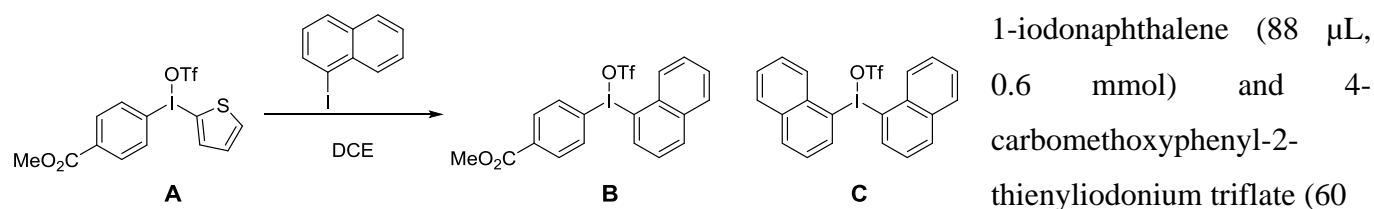

mg, 0.12 mmol) combined and stirred for 12h to afford 38% (24 mg) of a mixture of products.

<sup>1</sup>H: 4-carbomethoxyphenyl-1-naphthyl-2-thienyliodonium triflate (**B**): 8.94-8.90 (m, 1 H), 8.45 (app d,  $J = 8.7$  Hz, 2 H), 8.38 (d,  $J = 8.3$  Hz, 1 H), 8.37 (d,  $J = 8.4$  Hz, 1 H), 8.10 (d,  $J = 8.4$  Hz, 1 H), 8.03 (app d,  $J = 8.6$  Hz, 2 H), 7.85 (ddd,  $J = 8.3, 7.0, 1.2$  Hz, 1 H), 7.79-7.60 (m, 2 H), 3.86 (s, 3H).

bis-(1-naphthyl)iodonium triflate (**C**): 8.94 (dd,  $J = 7.6, 0.9$  Hz, 2 H), 8.53 (app d,  $J = 8.5$  Hz, 2 H), 8.27 (d,  $J = 8.2$  Hz, 2 H), 8.02 (app d,  $J = 8.3$  Hz, 2 H), 7.85 (ddd,  $J = 8.3, 7.0, 1.2$  Hz, 2 H), 7.71 (ddd,  $J = 8.1, 7.2, 0.8$  Hz, 2 H), 7.61 (t,  $J = 7.9$  Hz, 2 H).

<sup>13</sup>C: 139.6, 139.0, 136.1, 135.9, 135.5, 135.1, 133.2, 132.53, 132.45, 131.1, 130.9, 130.63, 130.55, 129.55, 129.2, 129.1, 128.7, 128.5, 127.8, 124.2, 120.0, 119.4, 117.9, 53.0.

### 5. Table of calculated charges on the I-atom of selected diaryliodonium triflates

Note: charge values are reported only for the more thermodynamically favorable stereoisomer of the diaryliodonium triflate, which in all cases, and in accord with ref. 11b in the manuscript, was predicted to be the one with the more electron-deficient aryl ligand at an axial position (cf.  $Ar_a$ ), and the more electron-rich one, at an equatorial position (cf.  $Ar_e$ ). As stated in the manuscript (ref. 17), semiempirical calculations tend to be imprecise for hypervalent halogen compounds (cf. J. J. P. Stewart, *J. Comput. Chem.* **1989**, *10*, 221). Accordingly, the data below should be interpreted only as reflecting a trend.

| structure                                                                         | charge on the I atom <sup>[a]</sup>   |                                                  |         |         |
|-----------------------------------------------------------------------------------|---------------------------------------|--------------------------------------------------|---------|---------|
|                                                                                   | $Ar_e$                                | $Ar_a$                                           | MNDO    | MNDO-d  |
| 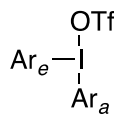 | 1-Naphthyl                            | Ph                                               | + 0.859 | + 1.366 |
|                                                                                   | Ph                                    | Ph                                               | + 0.875 | + 1.379 |
|                                                                                   | 4-Me-C <sub>6</sub> H <sub>4</sub>    | 4-Me-C <sub>6</sub> H <sub>4</sub>               | + 0.876 | + 1.381 |
|                                                                                   | Ph                                    | 4-MeOOC-C <sub>6</sub> H <sub>4</sub>            | + 0.882 | + 1.381 |
|                                                                                   | Ph                                    | 4-O <sub>2</sub> N-C <sub>6</sub> H <sub>4</sub> | + 0.896 | + 1.401 |
|                                                                                   | 4-MeOOC-C <sub>6</sub> H <sub>4</sub> | 2-Thienyl                                        | + 0.947 | + 1.453 |

[a] Values are in units of electron charge, e

## 5. Proton and $^{13}\text{C}$ NMR Spectra

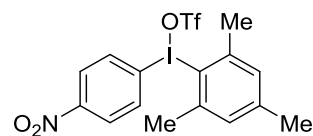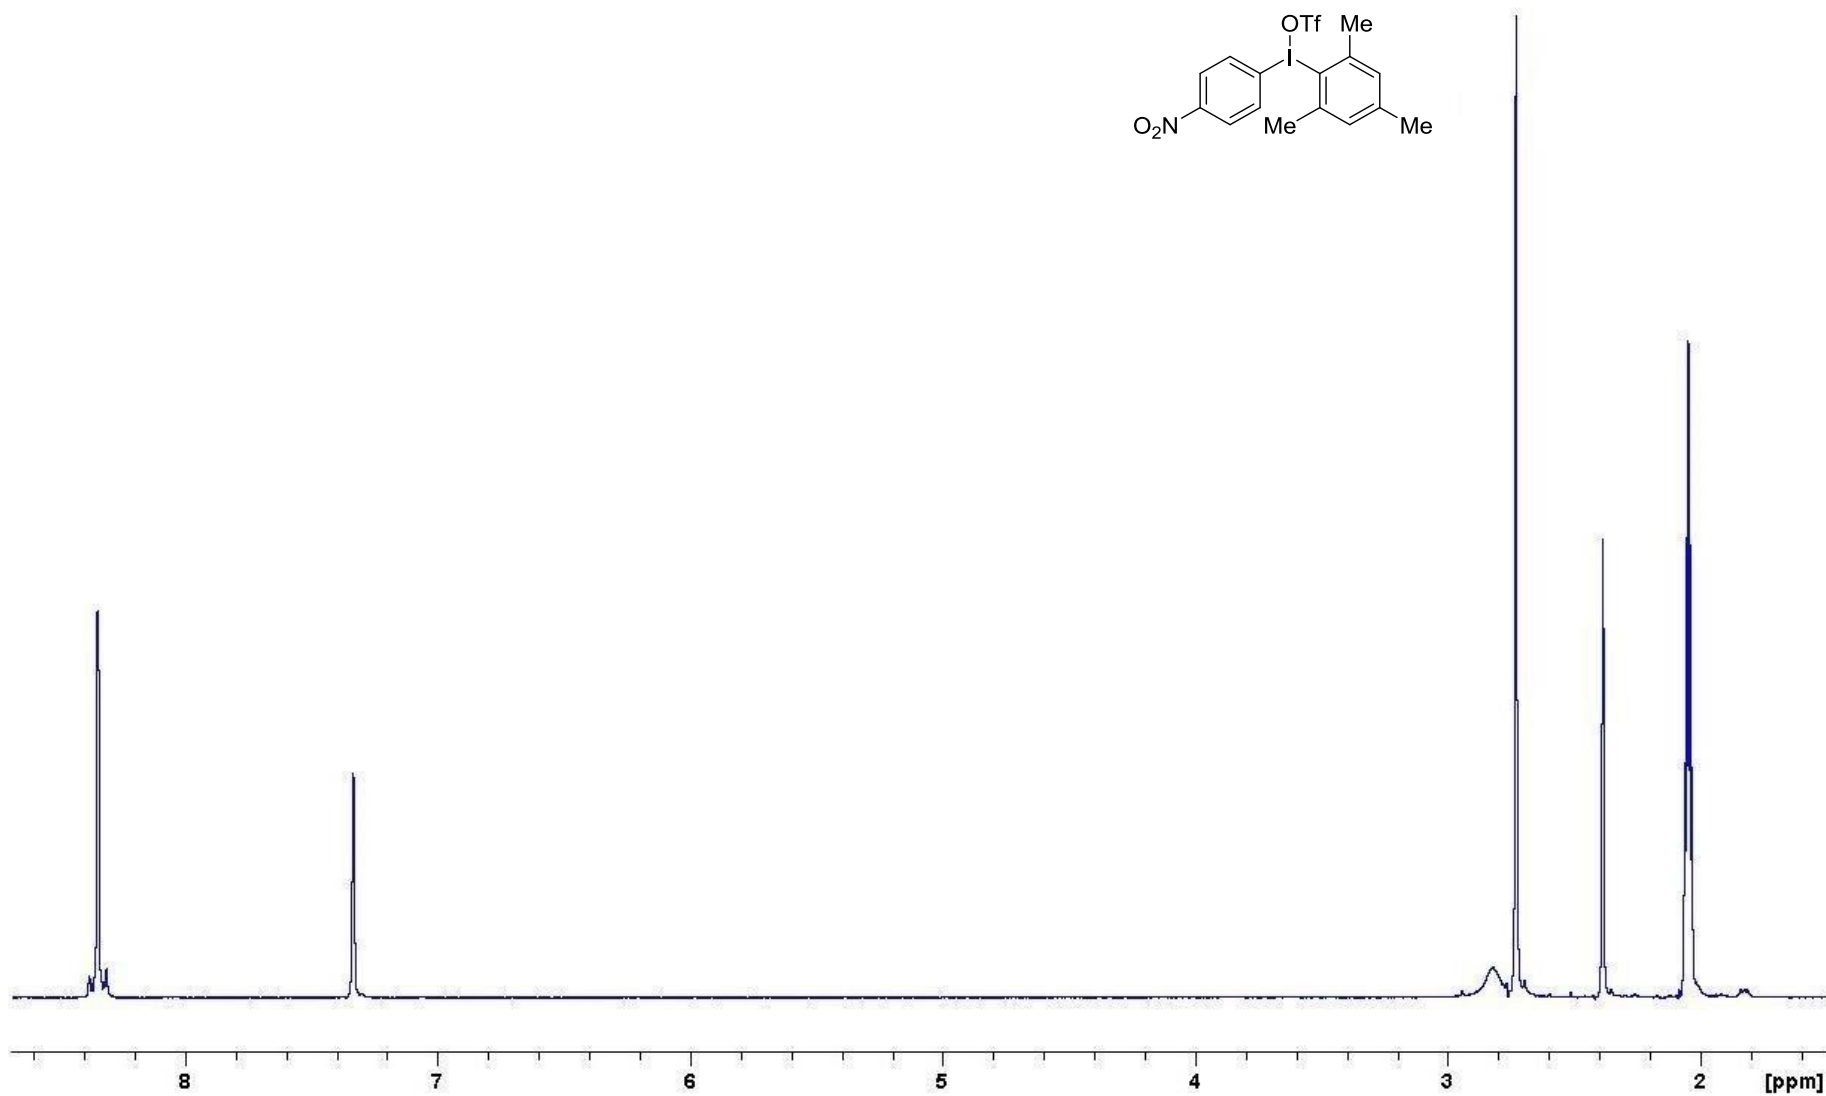

$^1\text{H}$  NMR spectrum of mesityl-4-nitrophenyliodonium triflate (acetone- $d_6$ )

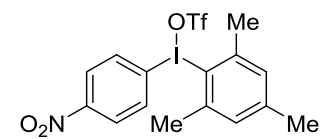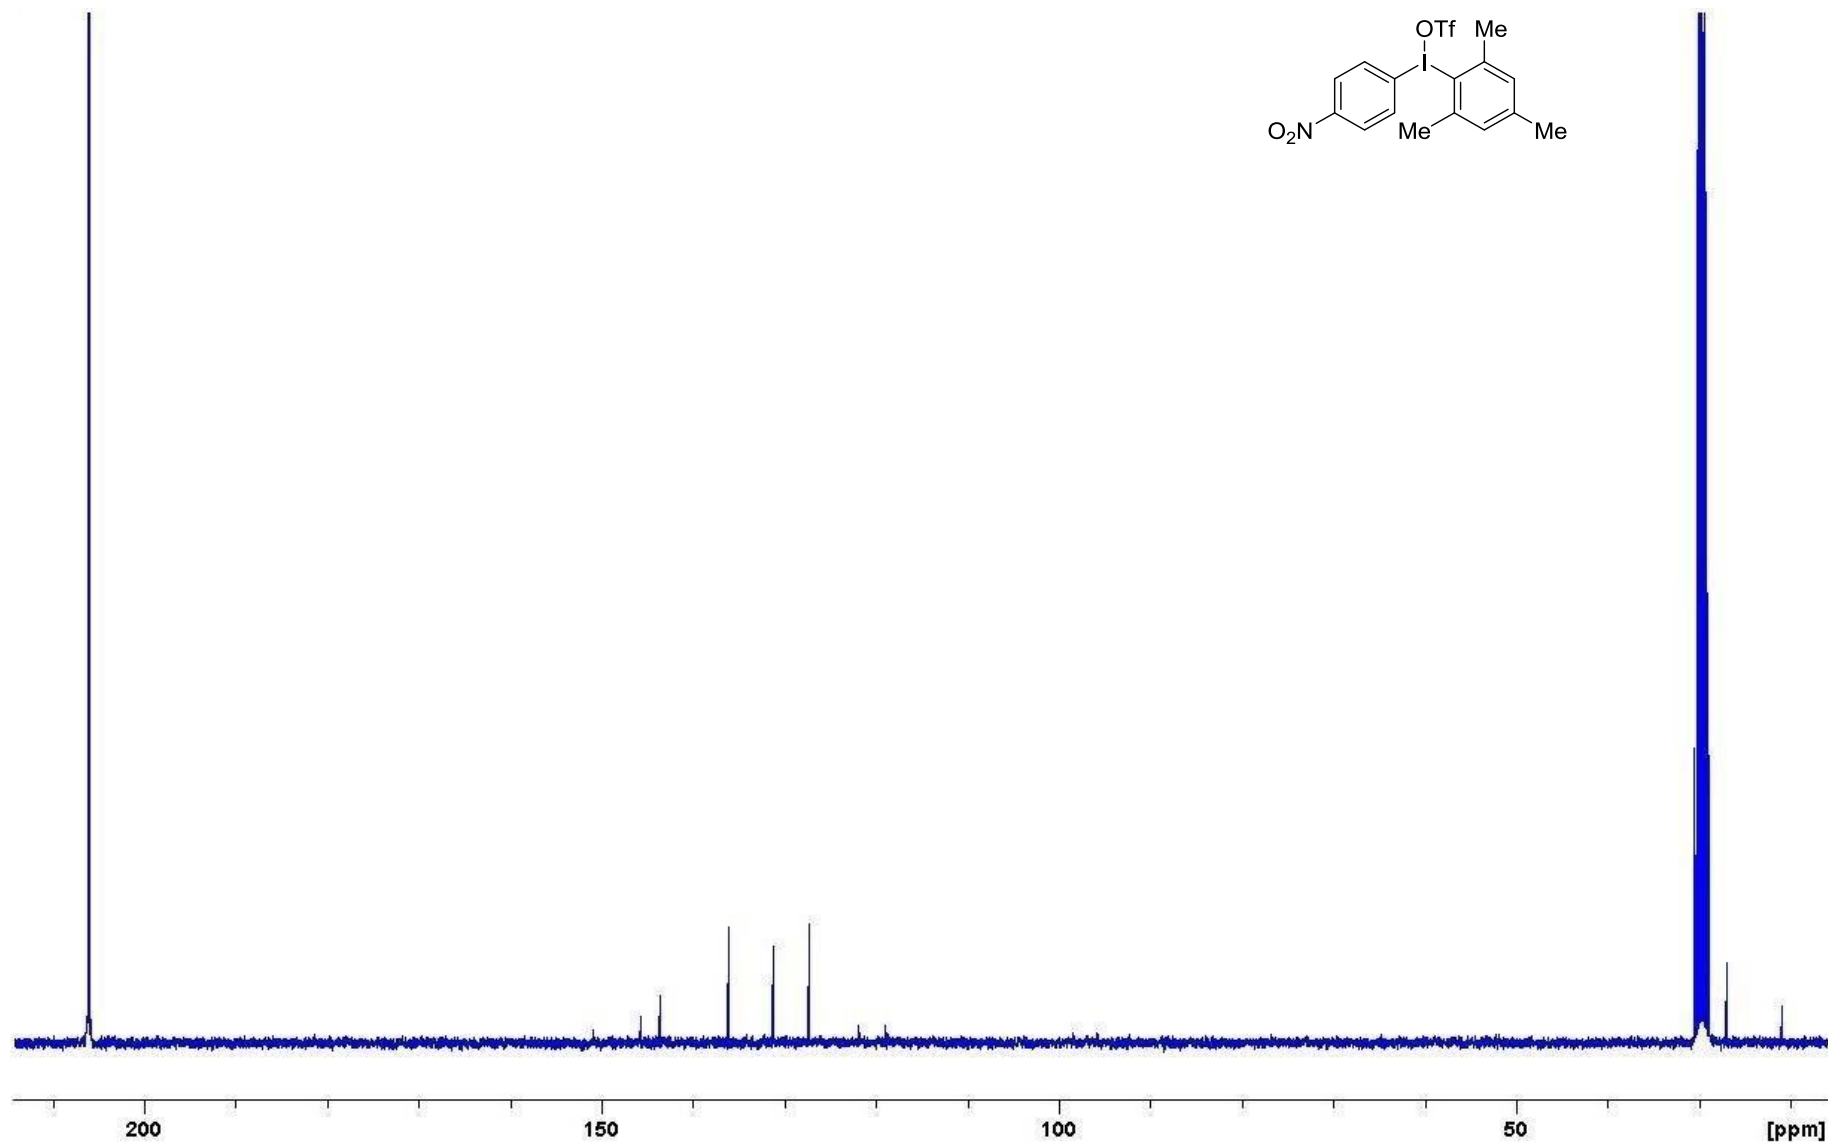

$^{13}\text{C}$  NMR spectrum of mesityl-4-nitrophenyliodonium triflate ( $\text{acetone-}d_6$ )

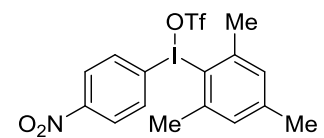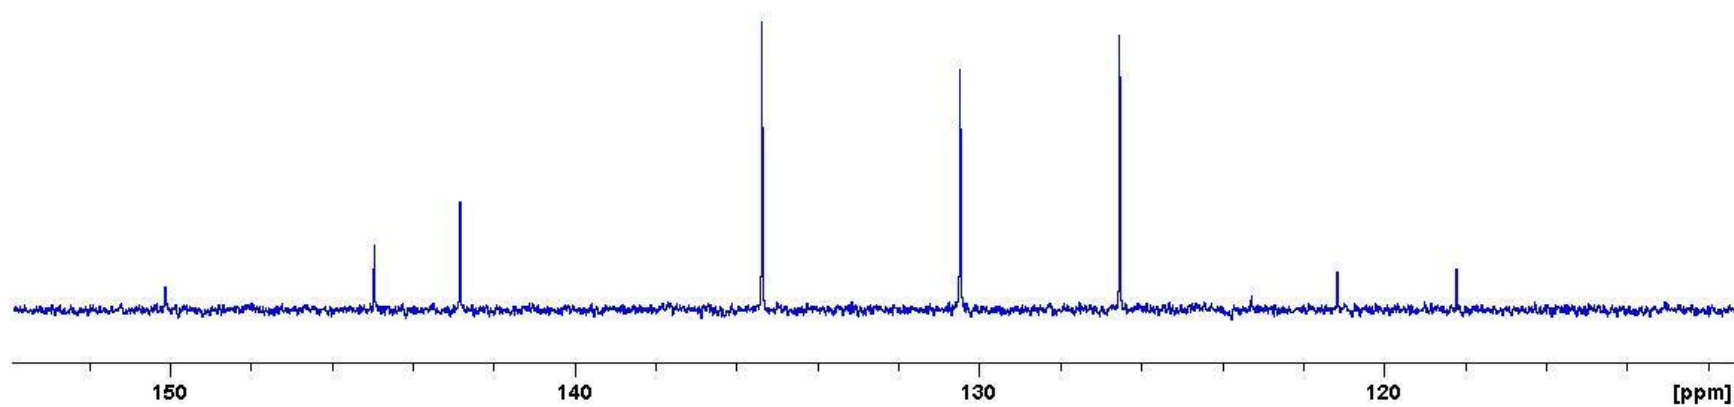

Expanded  $^{13}\text{C}$  NMR spectrum of mesityl-4-nitrophenyliodonium triflate ( $\text{acetone-}d_6$ )

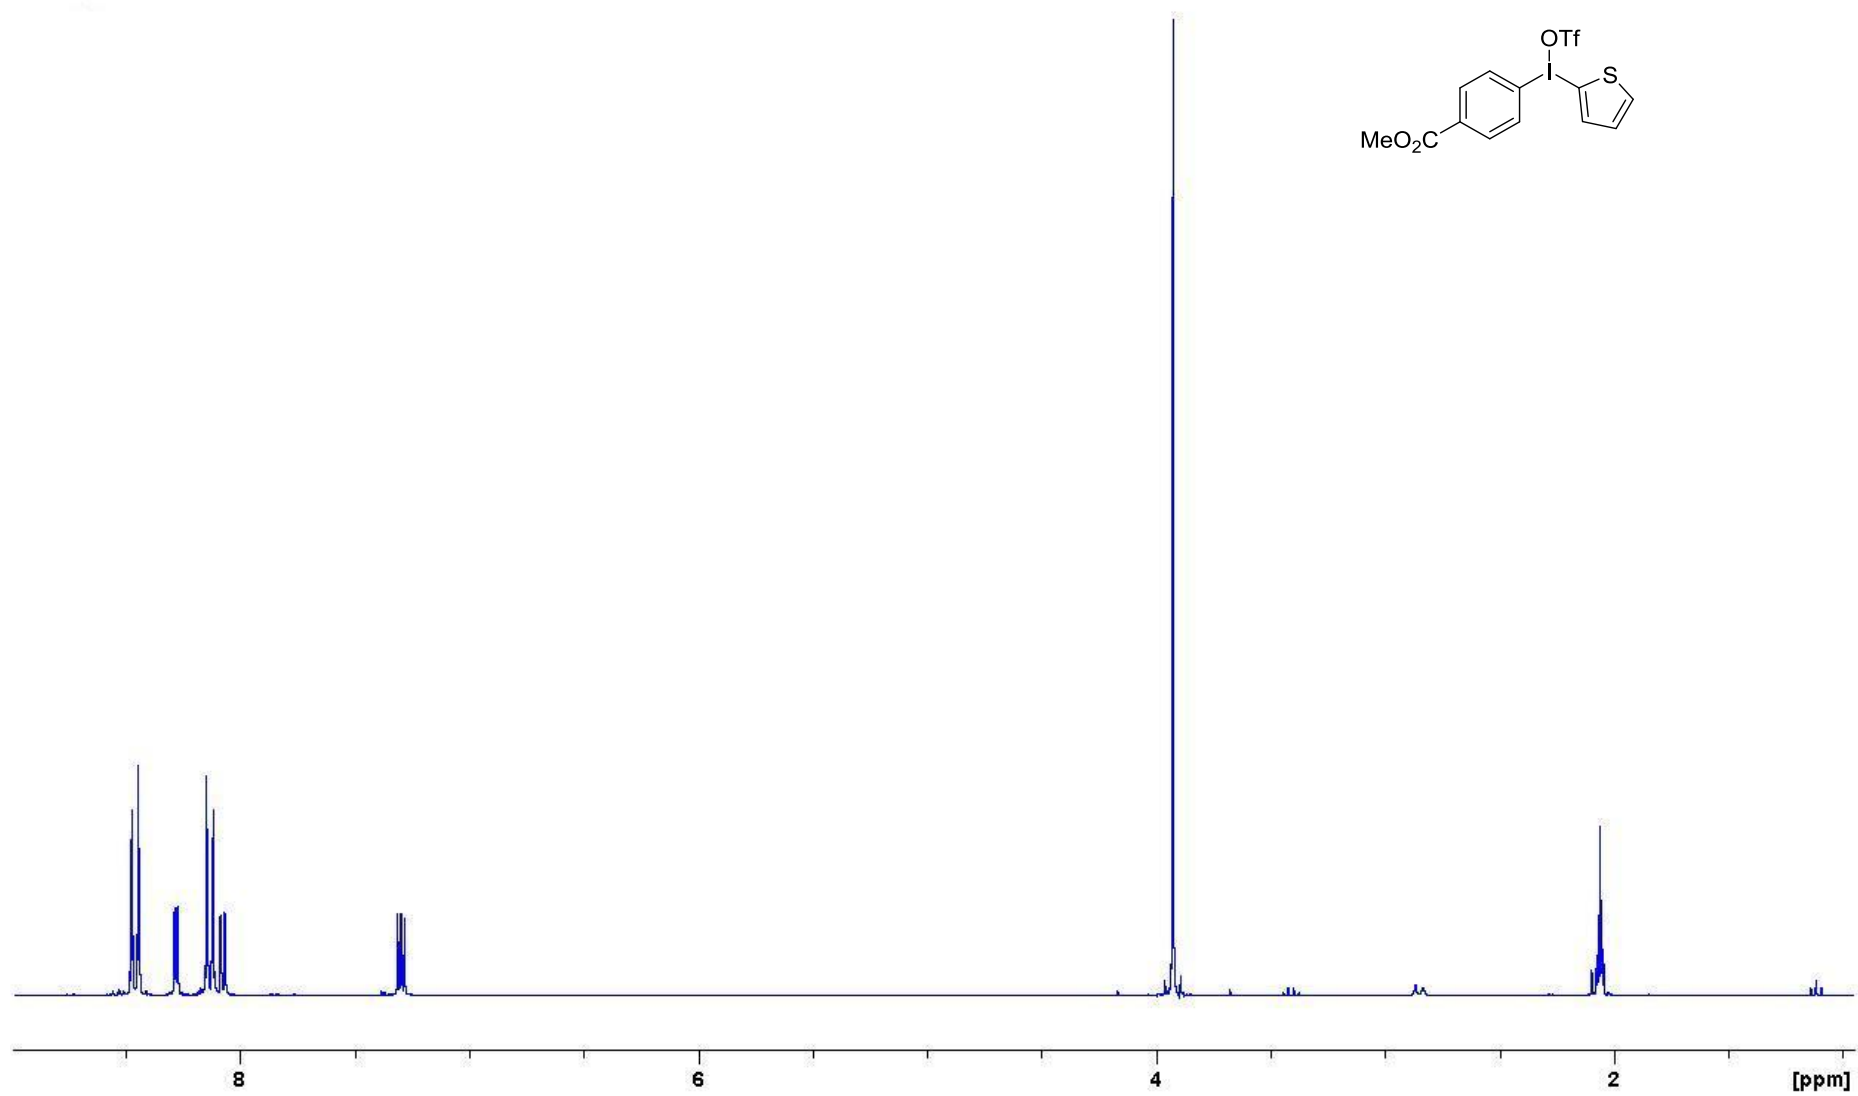

$^1\text{H}$  NMR spectrum of 4-carbomethoxyphenyl-2-thienyliodonium triflate ( $\text{acetone-}d_6$ )

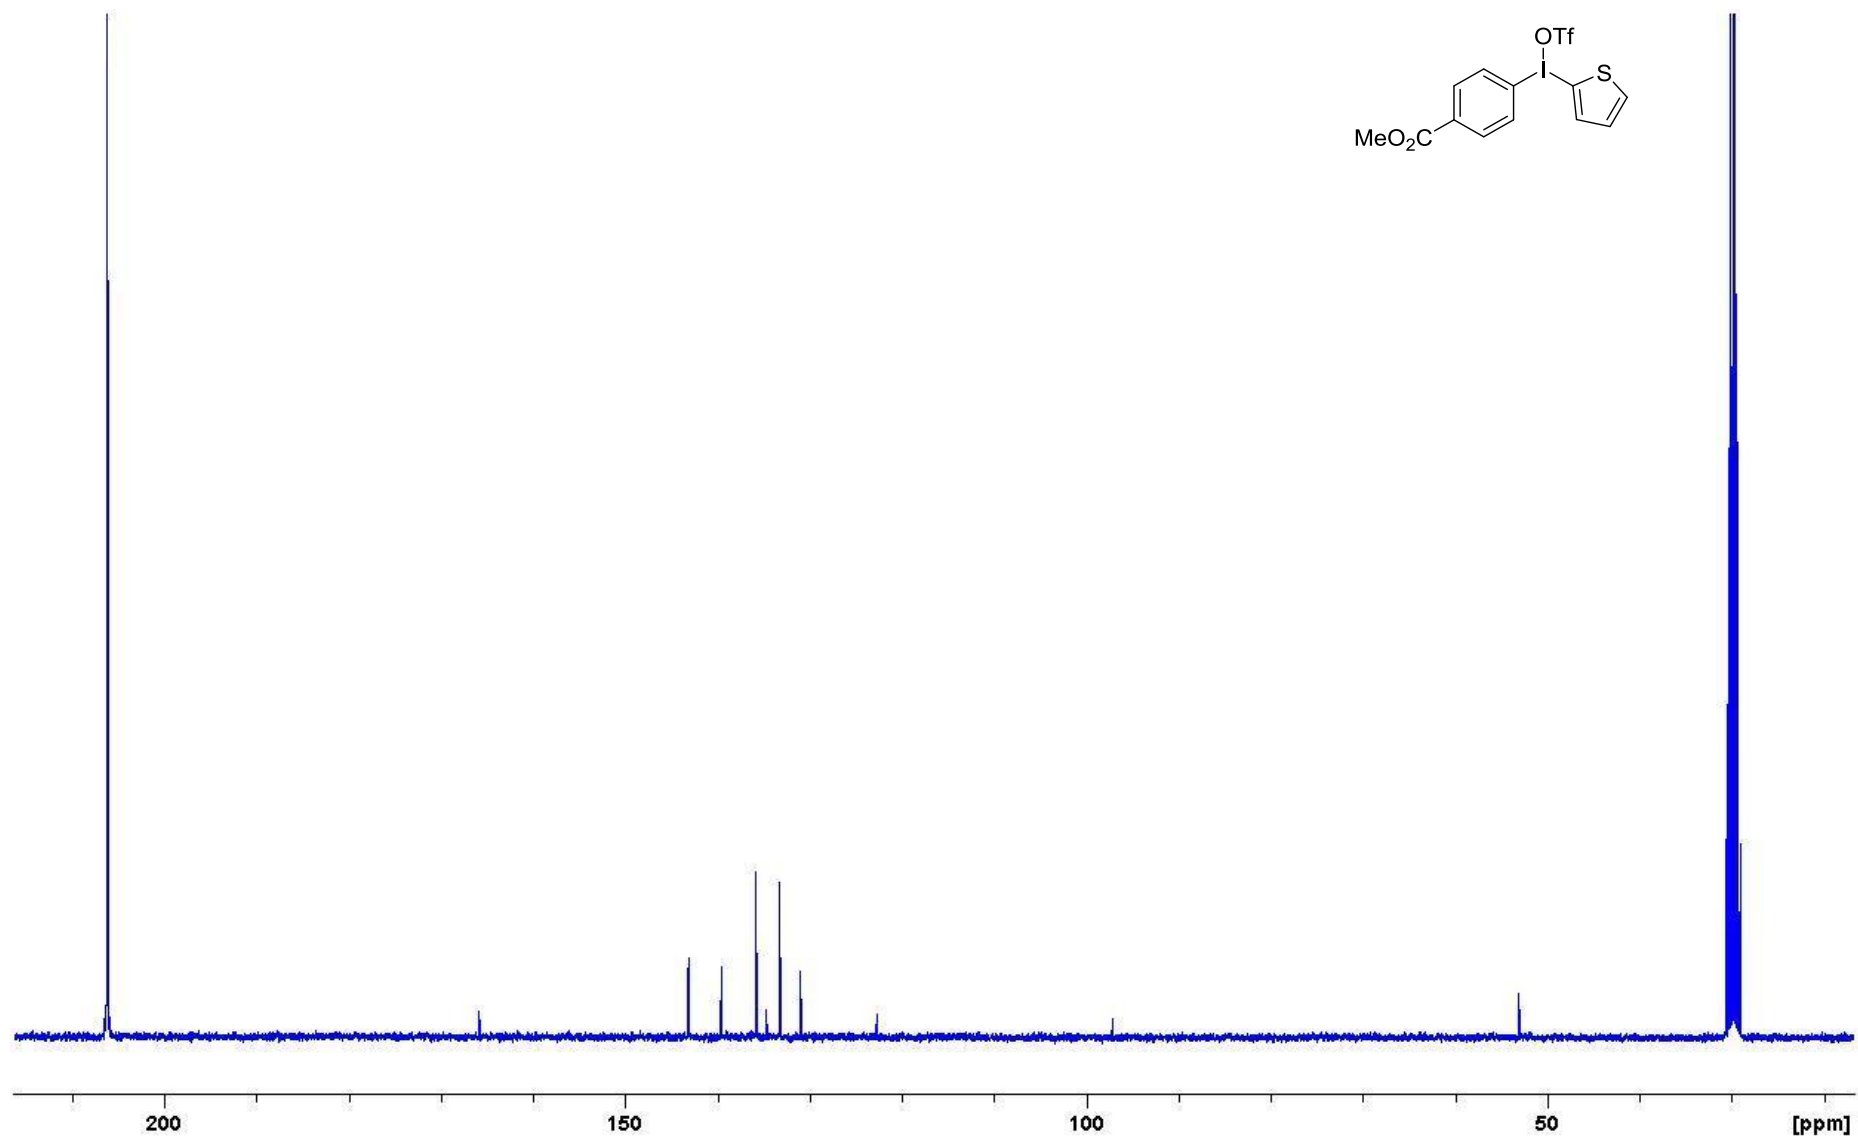

$^{13}\text{C}$  NMR spectrum of 4-carbomethoxyphenyl-2-thienyliodonium triflate (acetone- $d_6$ )



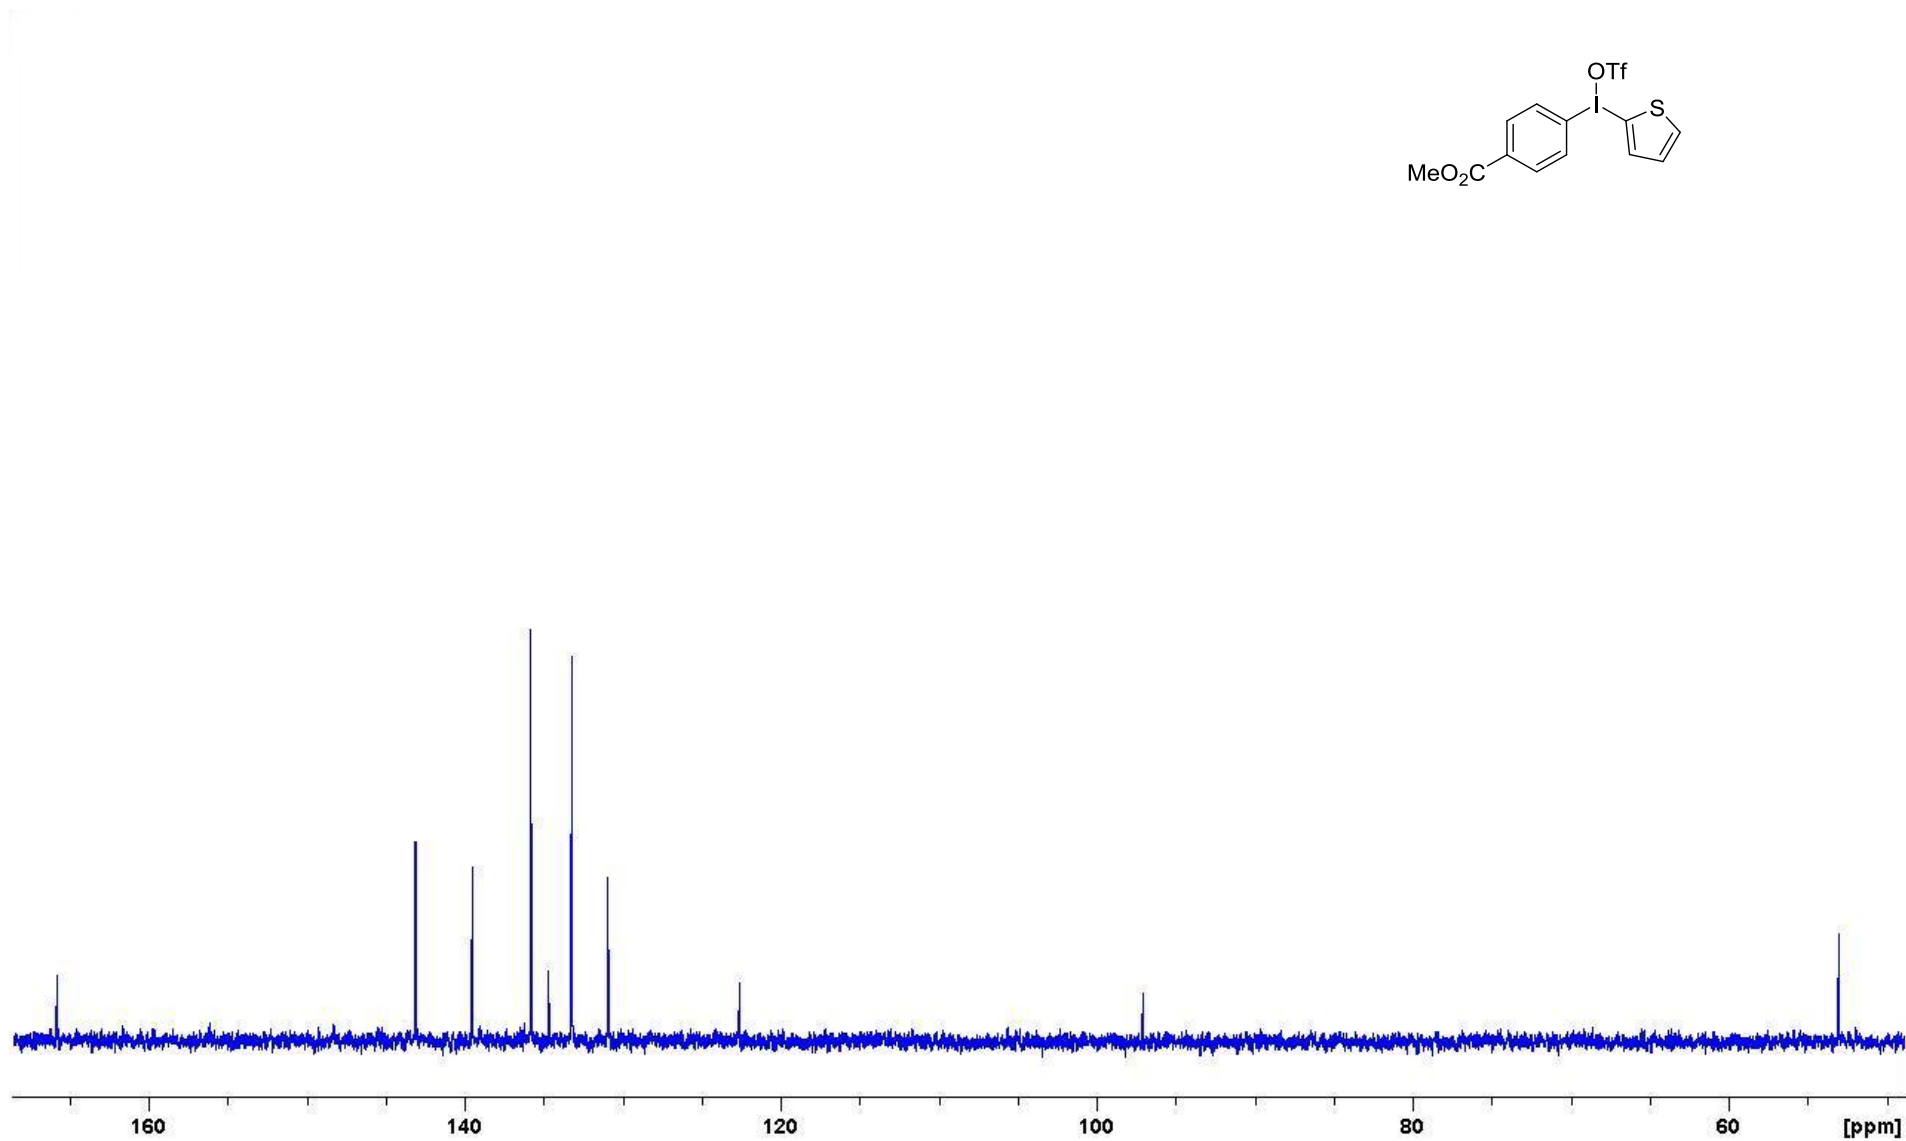

Expanded  $^{13}\text{C}$  NMR spectrum of 4-carbomethoxyphenyl-2-thienyliodonium triflate ( $\text{acetone-}d_6$ )

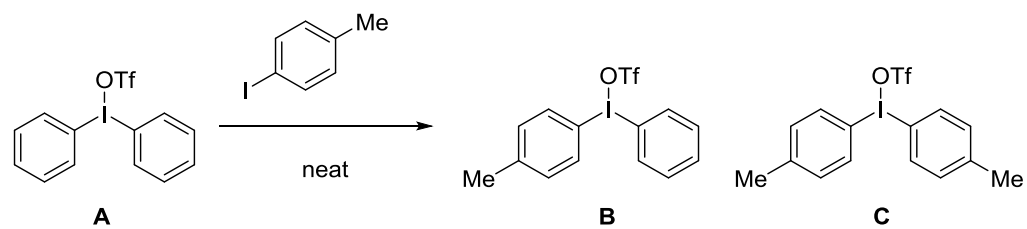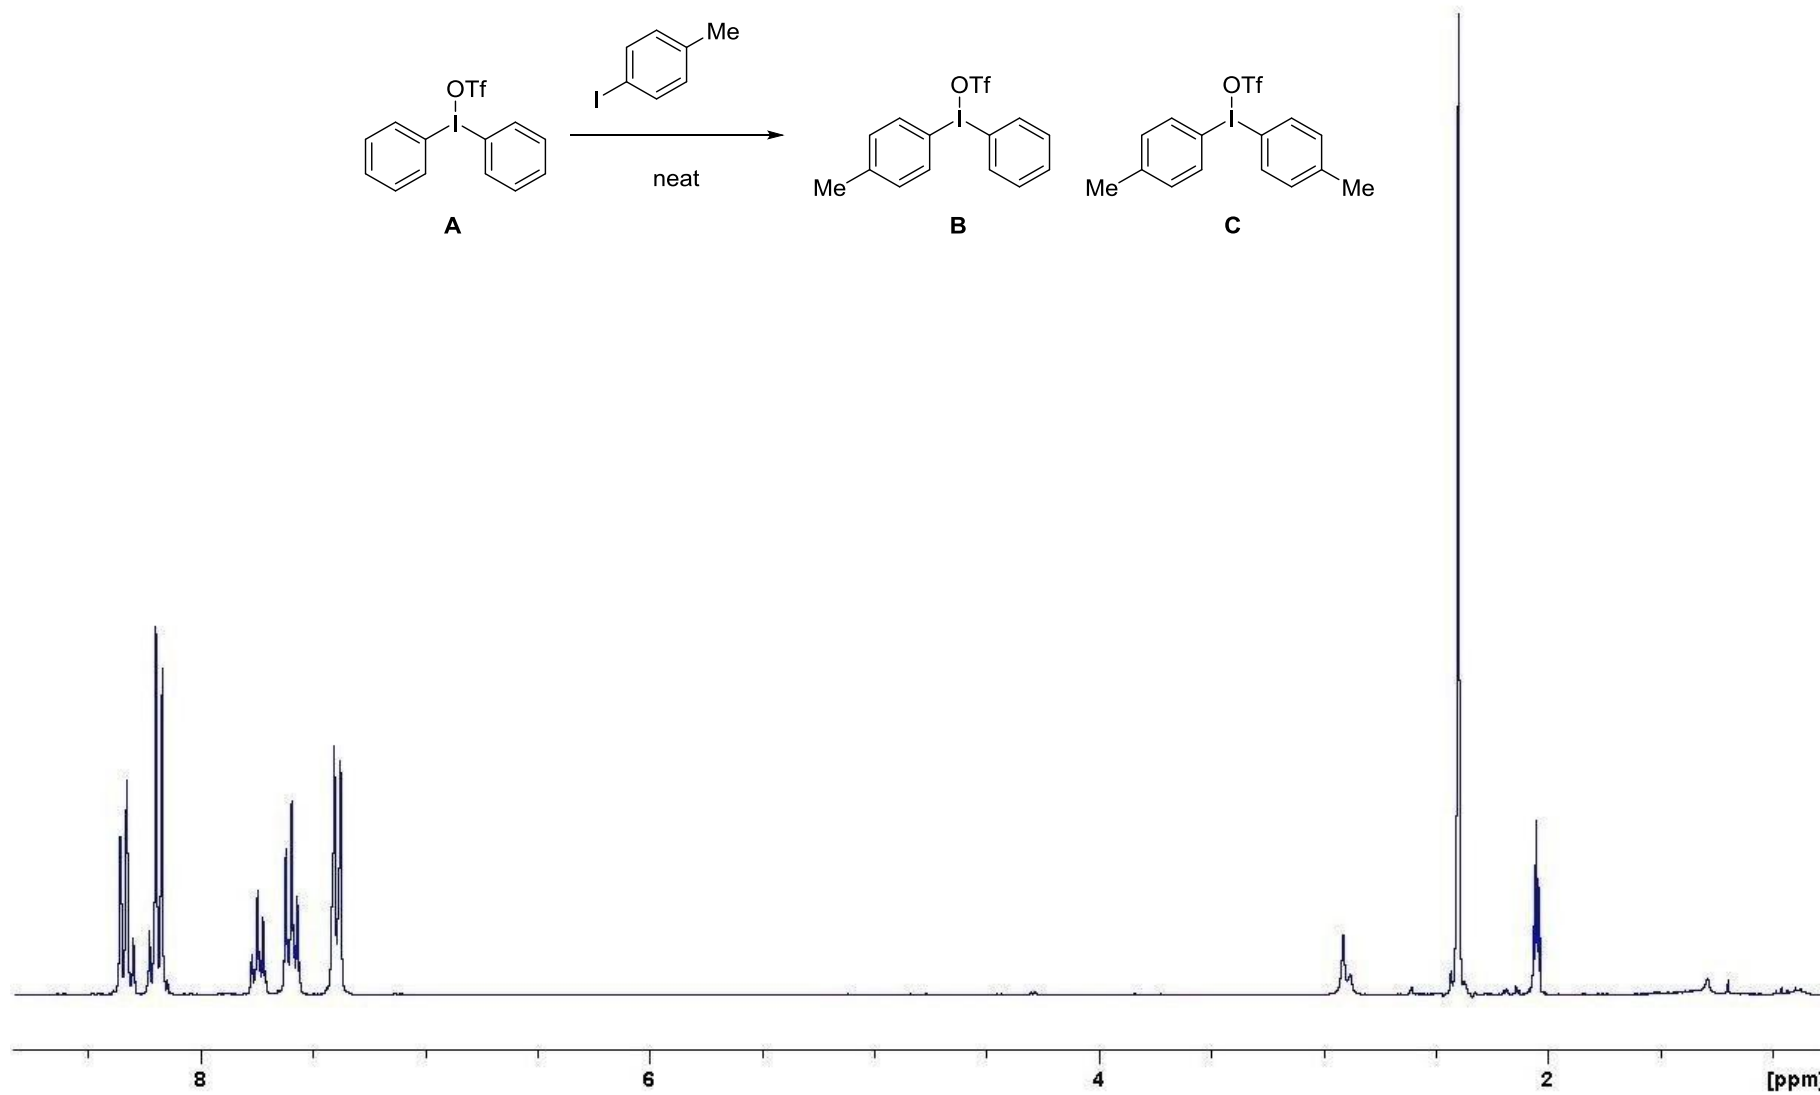

$^1\text{H}$  NMR spectrum of the product mixture obtained upon melt metathesis of  $\text{Ph}_2\text{IOTf}$  and 4-iodotoluene (acetone- $d_6$ )

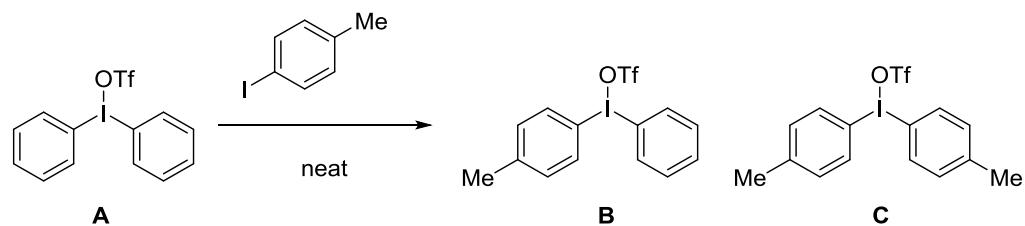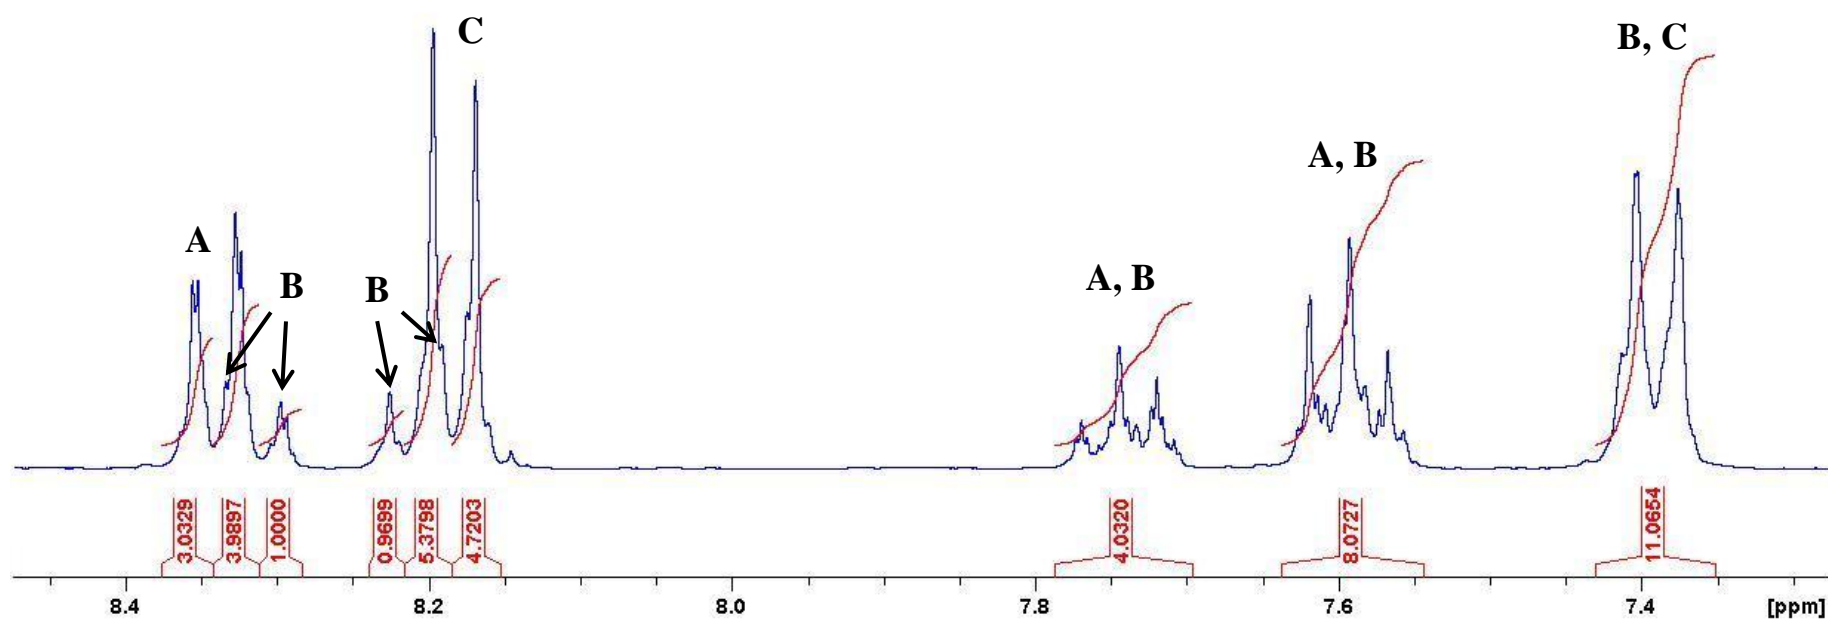

Expanded <sup>1</sup>H NMR spectrum of the product mixture obtained upon melt metathesis of Ph<sub>2</sub>IOTf and 4-iodotoluene (acetone-*d*<sub>6</sub>)

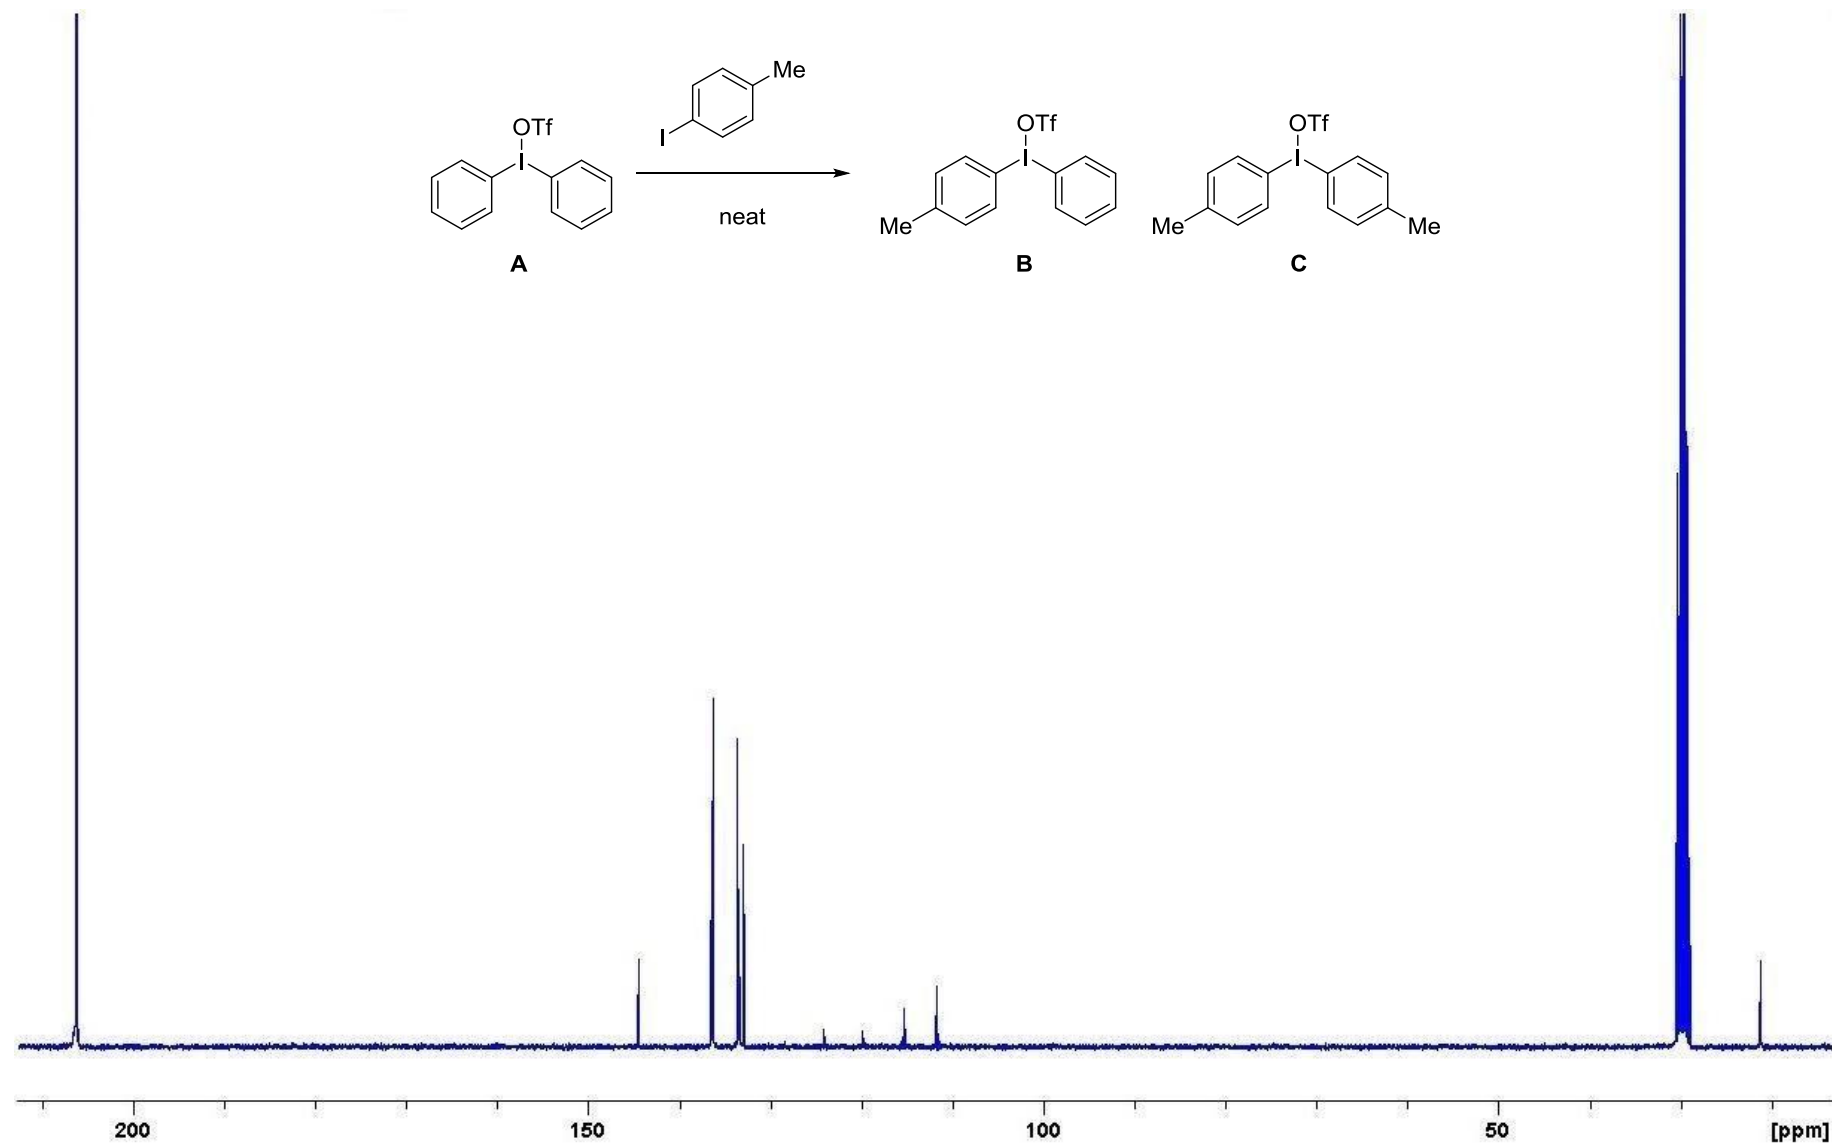

$^{13}\text{C}$  NMR spectrum of the product mixture obtained upon melt metathesis of  $\text{Ph}_2\text{IOTf}$  and 4-iodotoluene (acetone- $d_6$ )

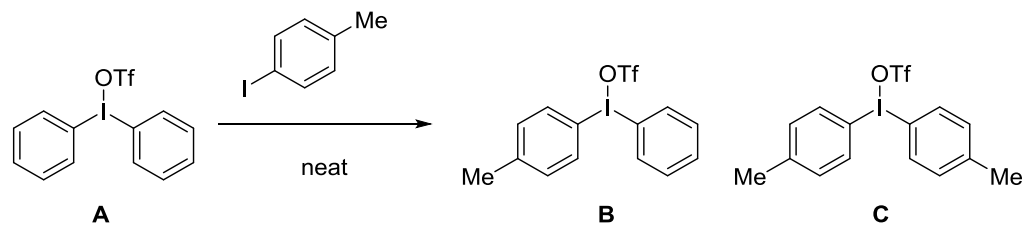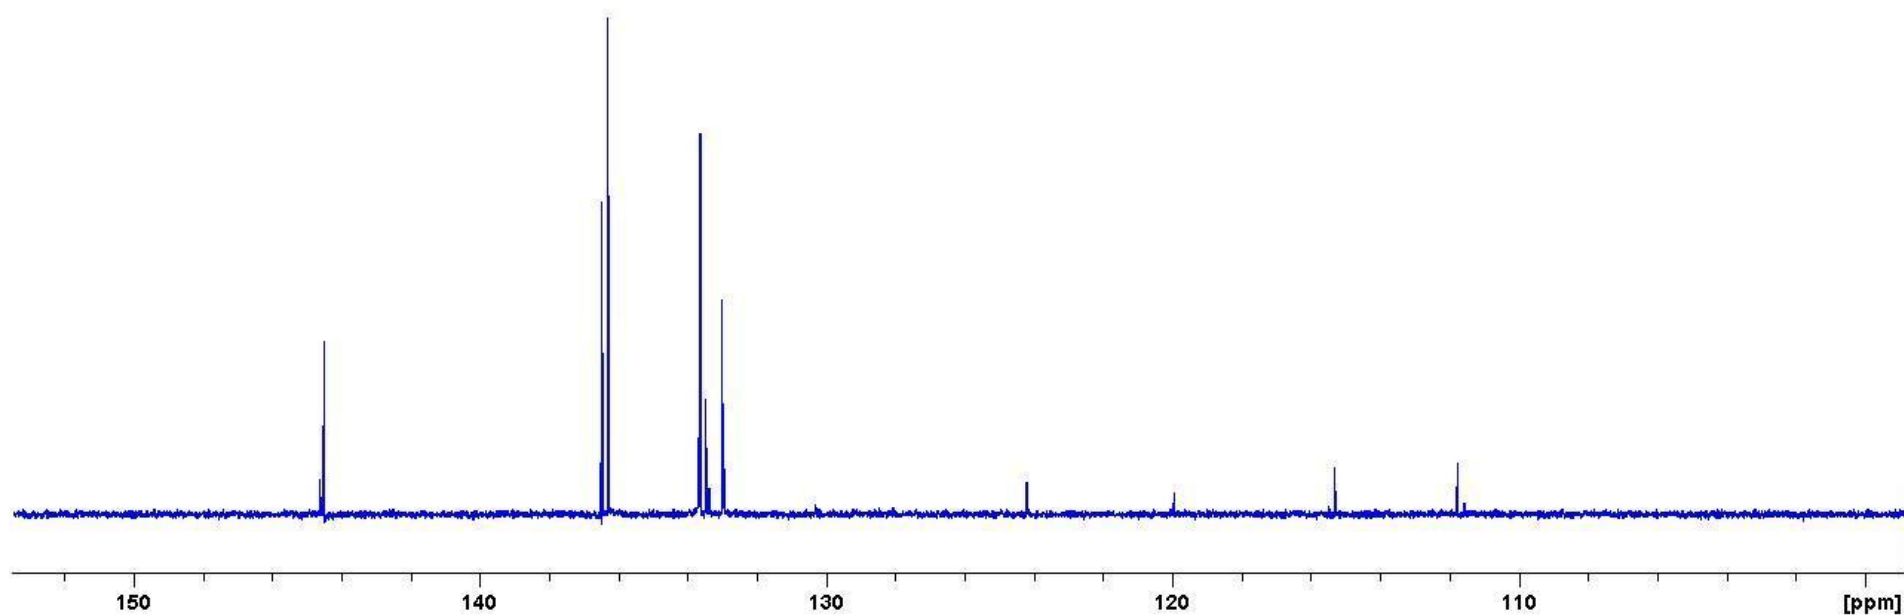

Expanded  $^{13}\text{C}$  NMR spectrum of the product mixture obtained upon melt metathesis of  $\text{Ph}_2\text{IOTf}$  and 4-iodotoluene ( $\text{acetone-}d_6$ )

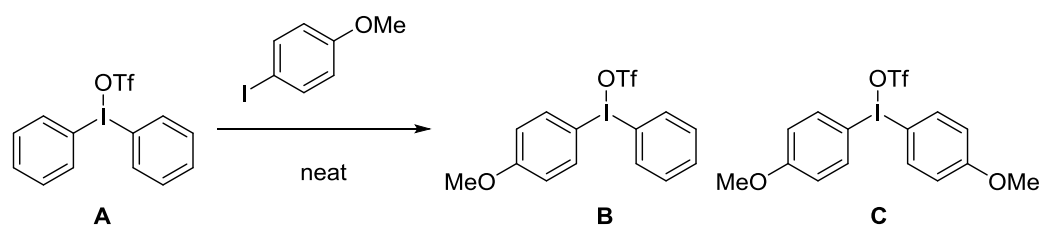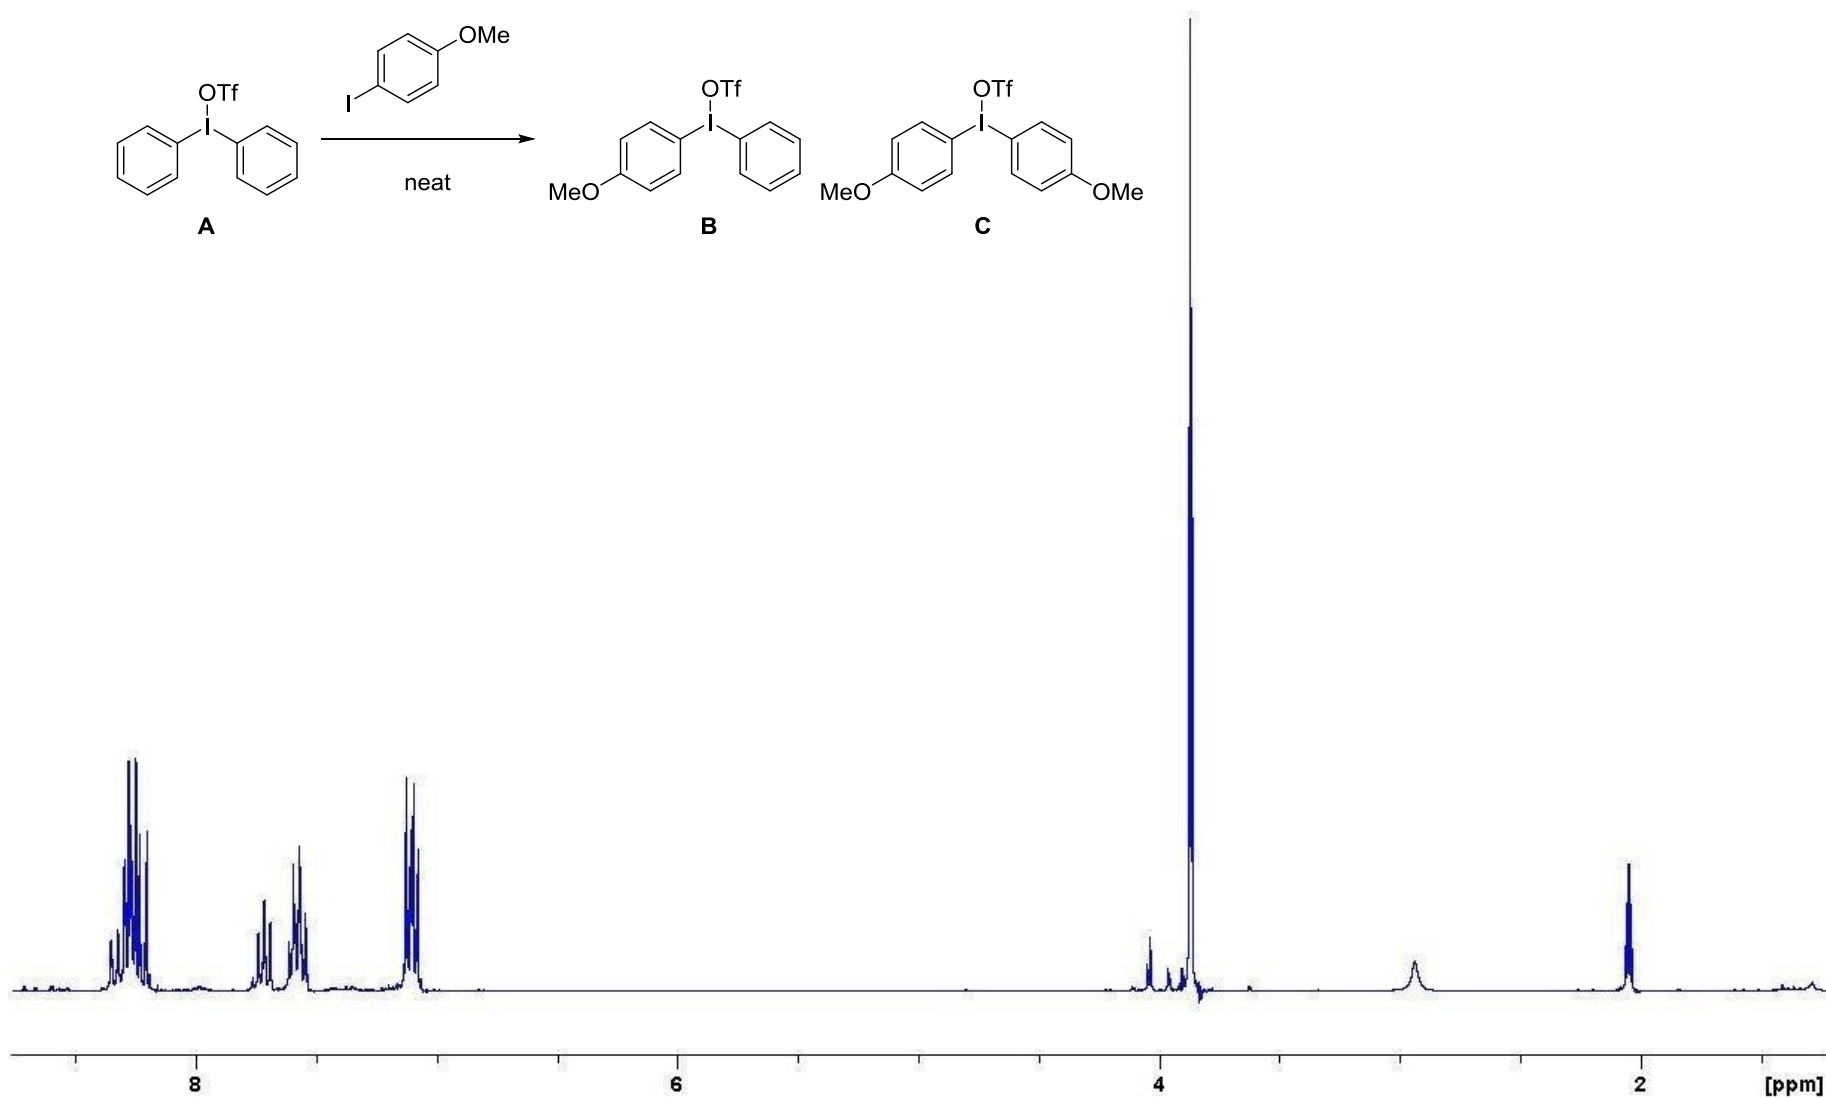

$^1\text{H}$  NMR spectrum of the product mixture obtained upon melt metathesis of  $\text{Ph}_2\text{IOTf}$  and 4-iodoanisole ( $\text{acetone-}d_6$ )

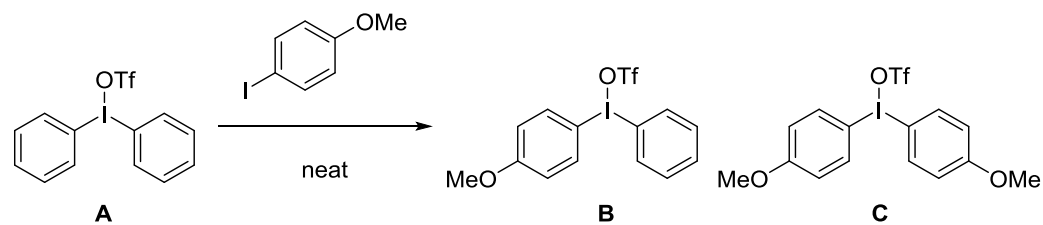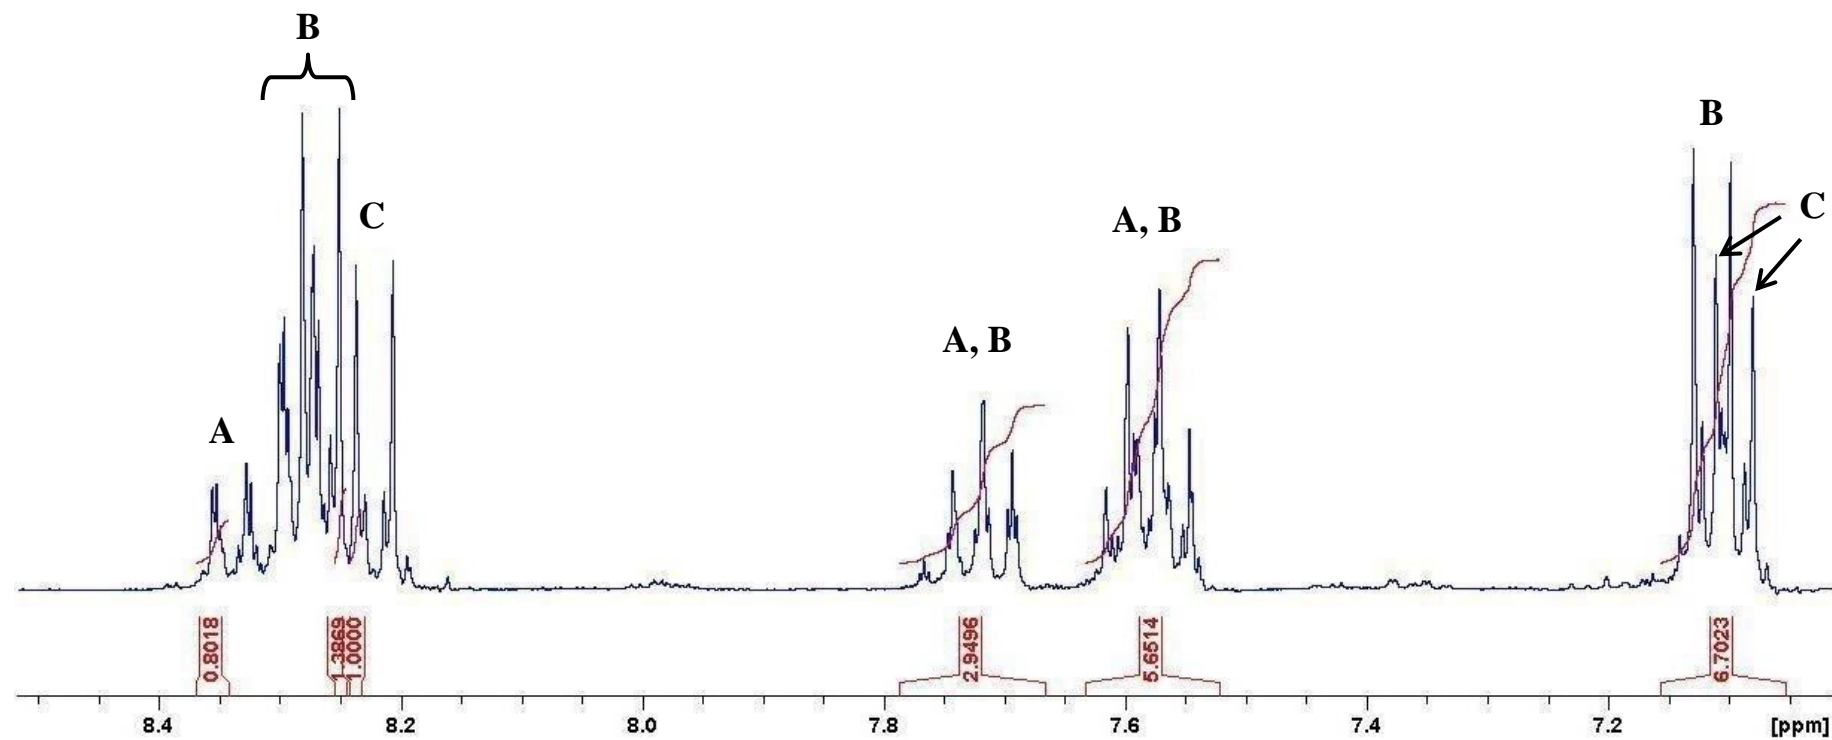

Expanded <sup>1</sup>H NMR spectrum of the product mixture obtained upon melt metathesis of Ph<sub>2</sub>IOTf and 4-iodoanisole (acetone-*d*<sub>6</sub>)

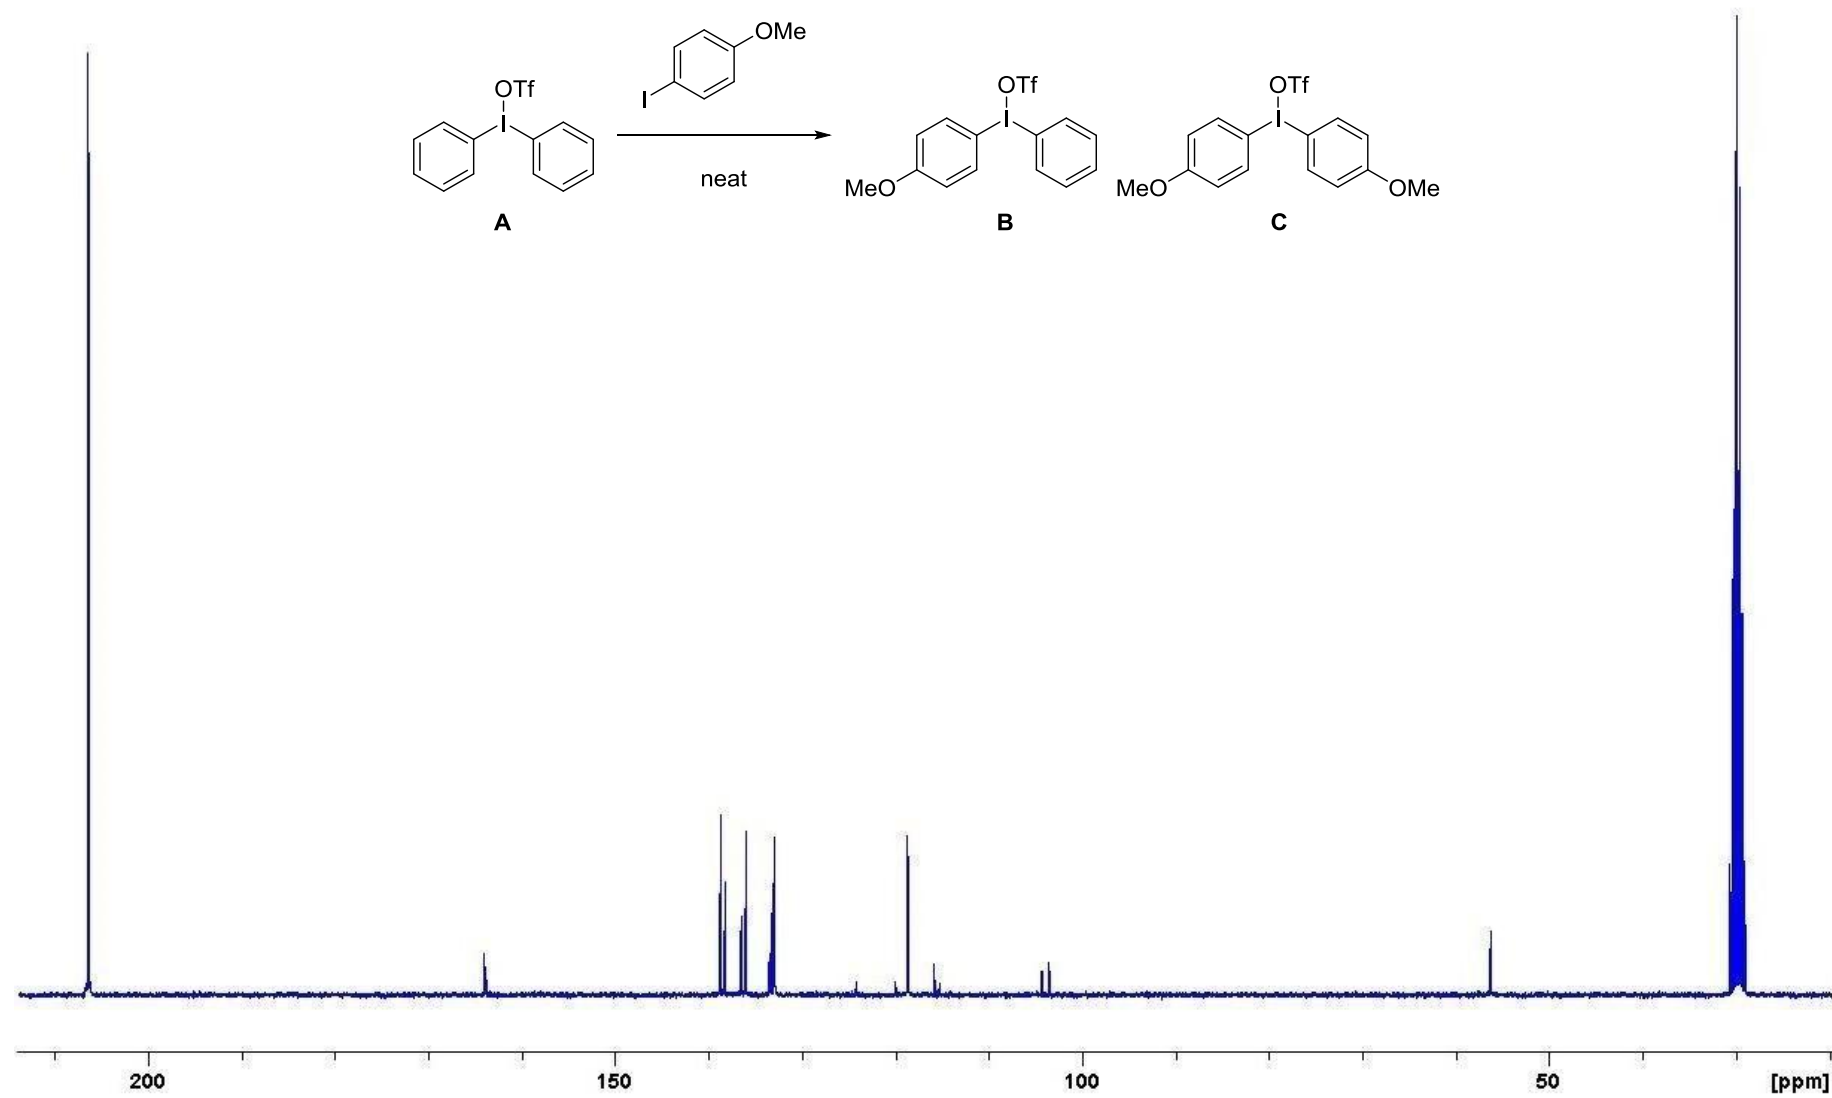

$^{13}\text{C}$  NMR spectrum of the product mixture obtained upon melt metathesis of  $\text{Ph}_2\text{IOTf}$  and 4-iodoanisole (acetone- $d_6$ )



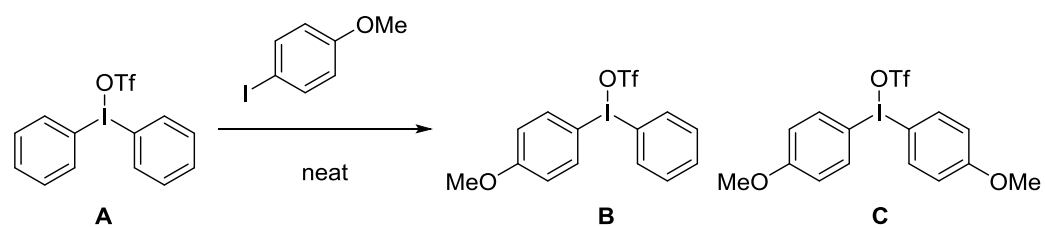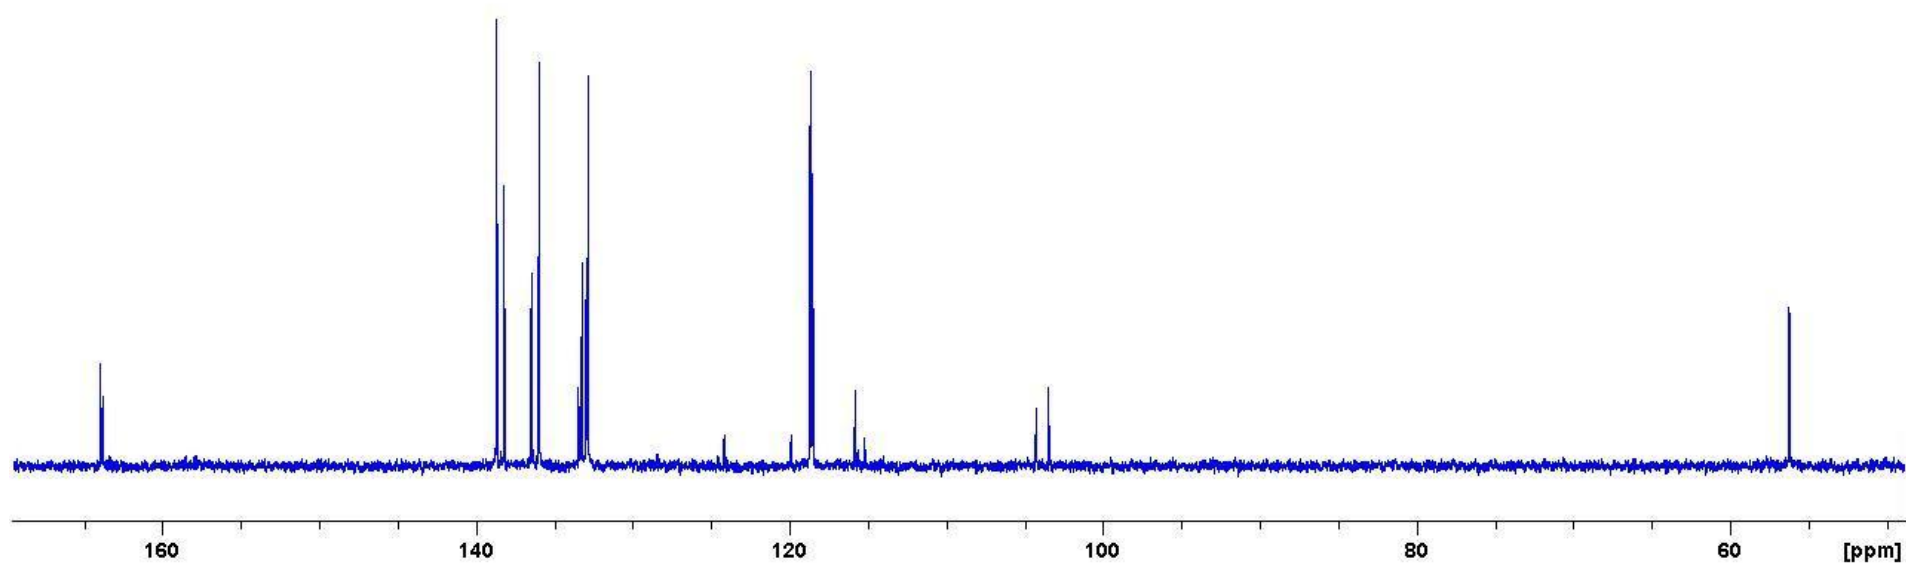

Expanded <sup>13</sup>C NMR spectrum of the product mixture obtained upon melt metathesis of Ph<sub>2</sub>IOTf and 4-iodoanisole (acetone-*d*<sub>6</sub>)

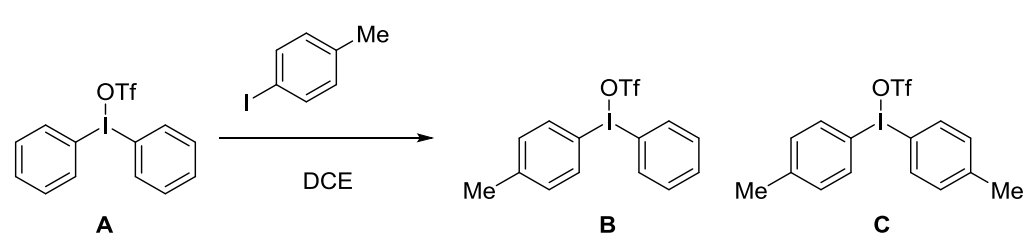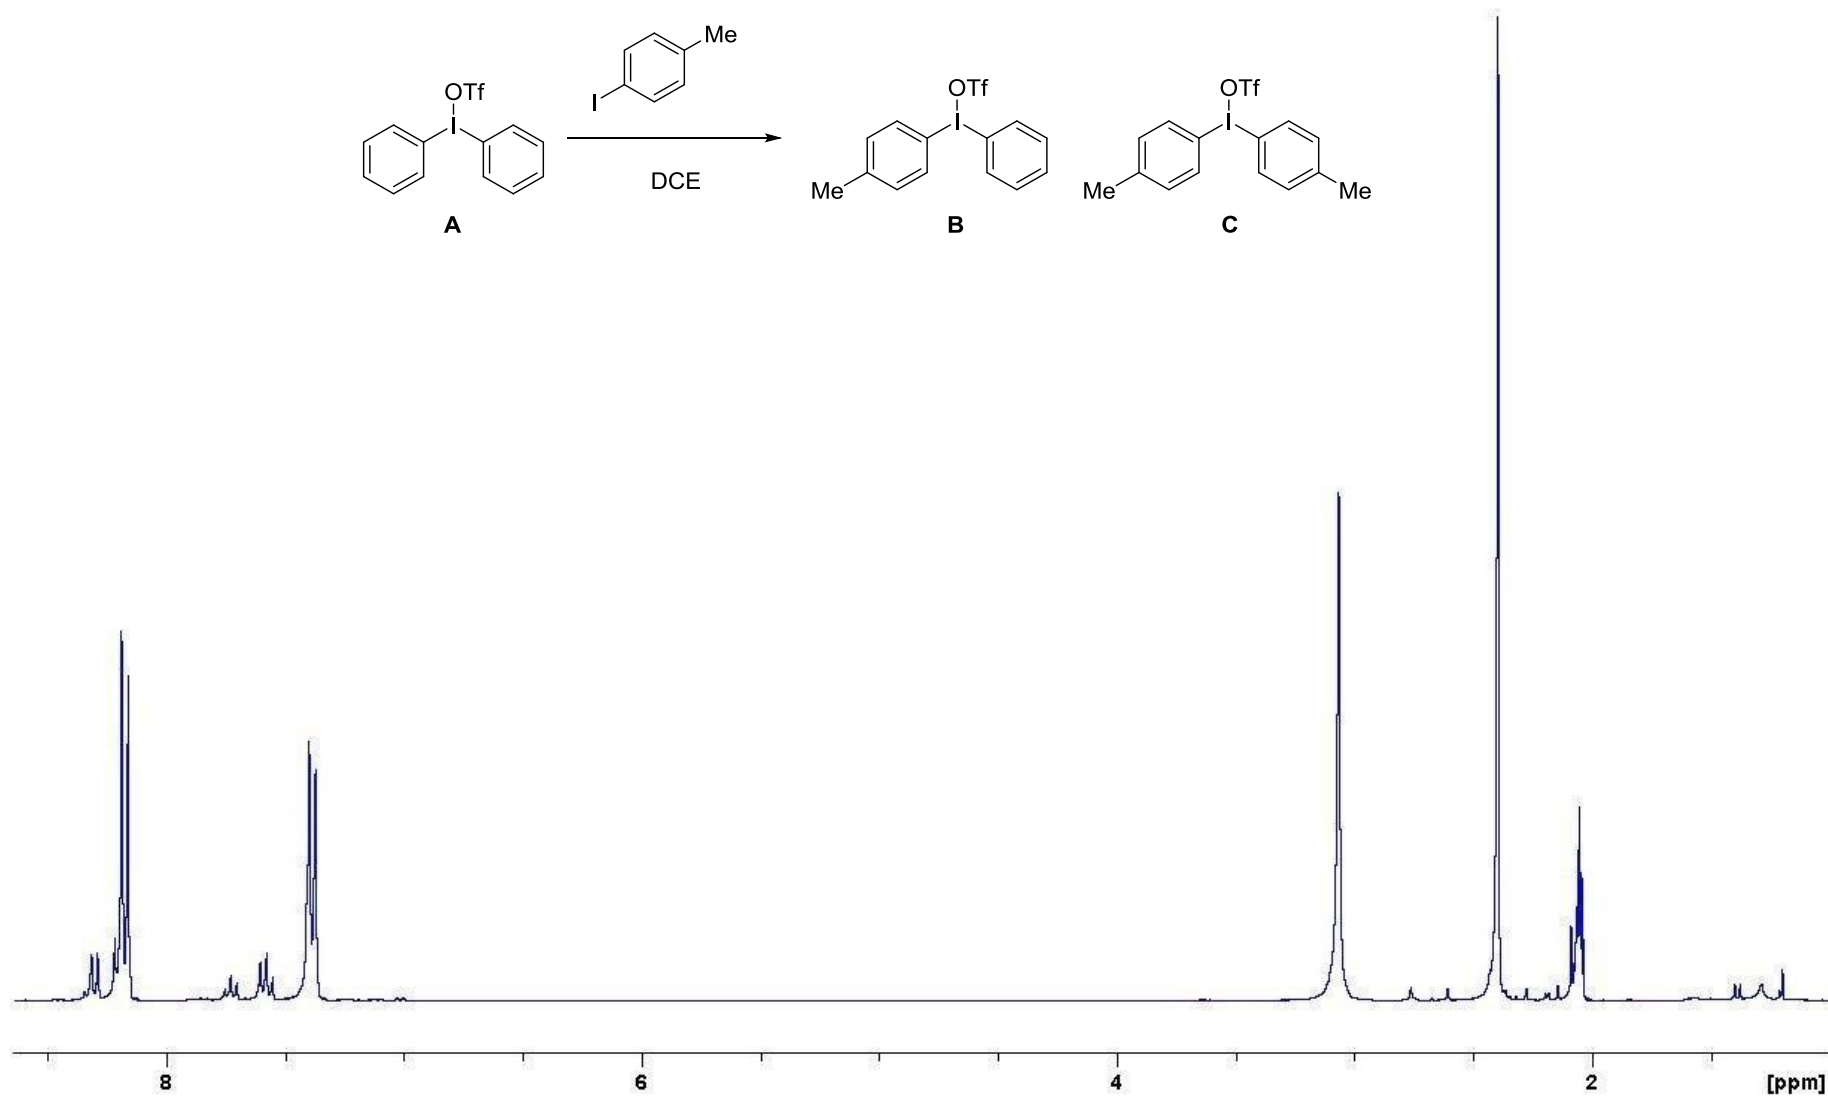

$^1\text{H}$  NMR spectrum of the product mixture obtained in entry a of Table 1 (acetone- $d_6$ )

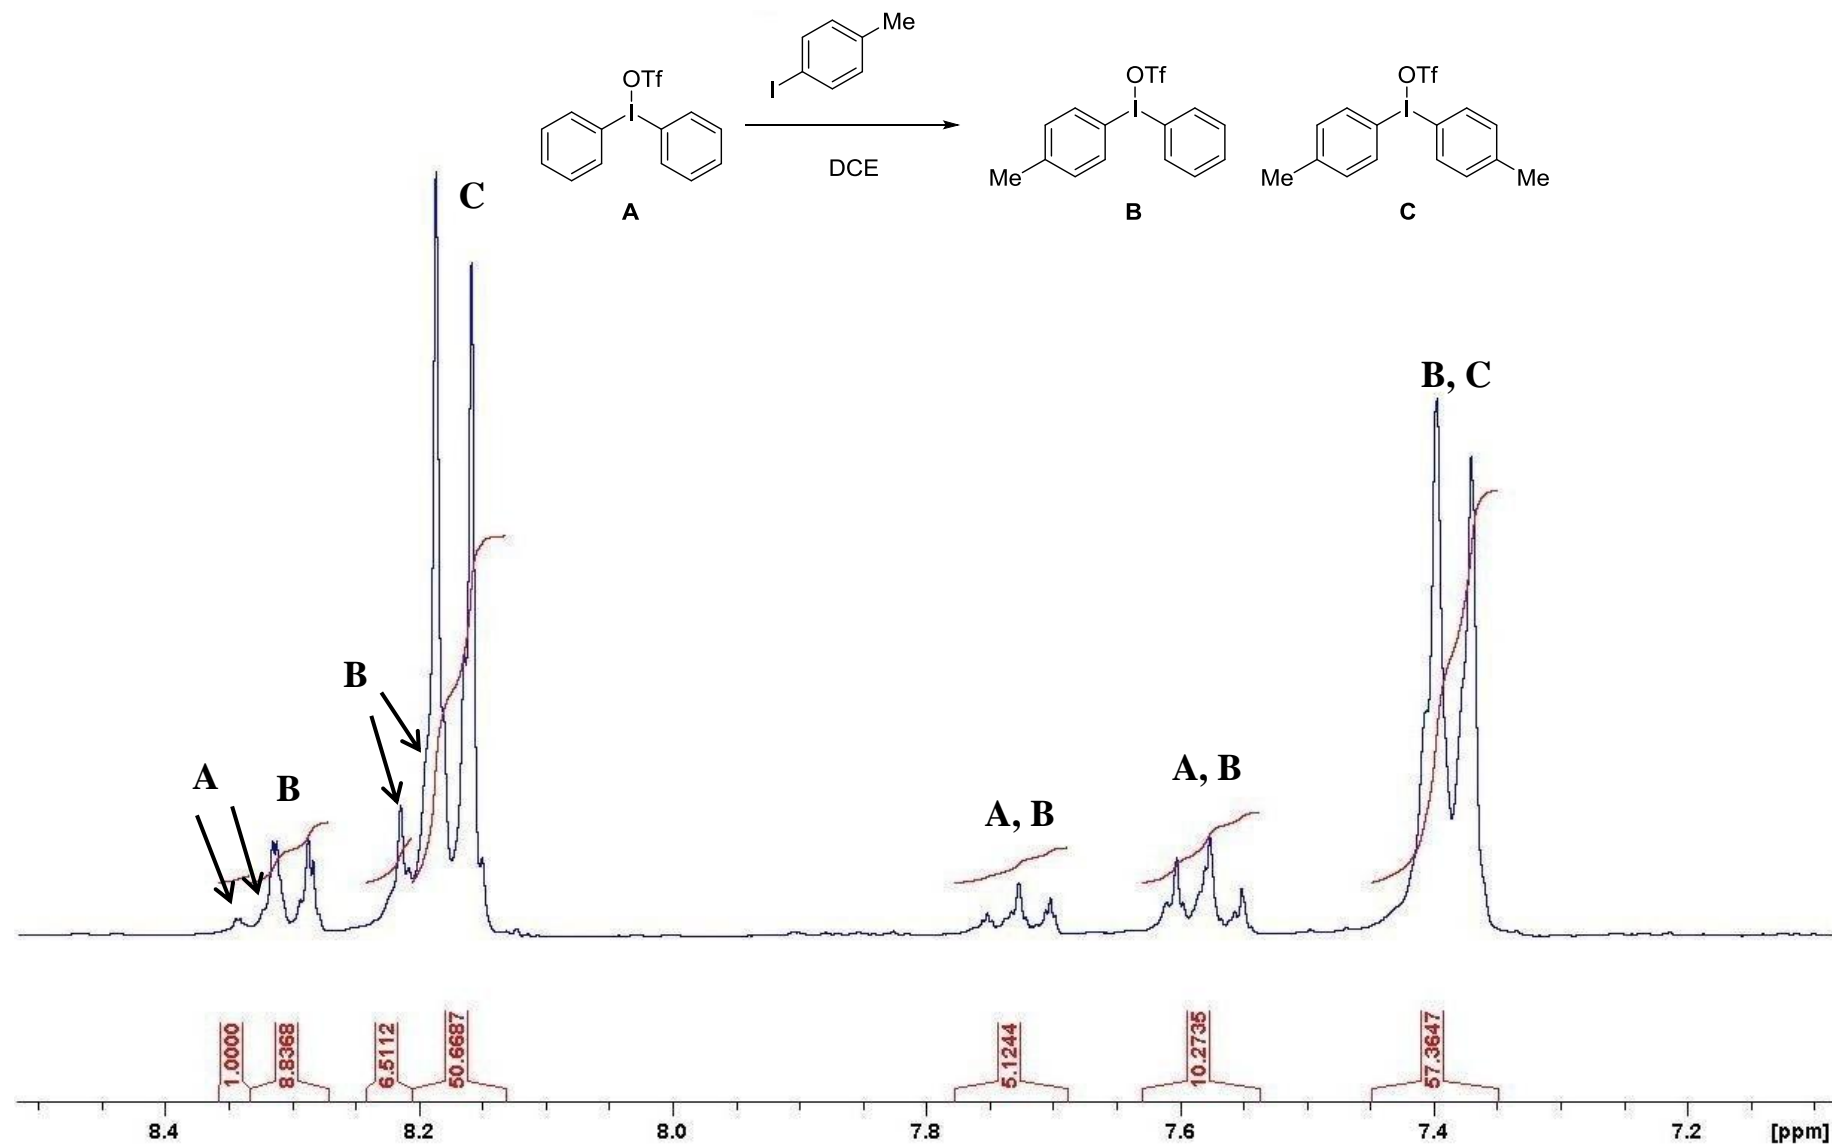Expanded  $^1\text{H}$  NMR spectrum of the product mixture obtained in entry a of Table 1 (acetone- $d_6$ )

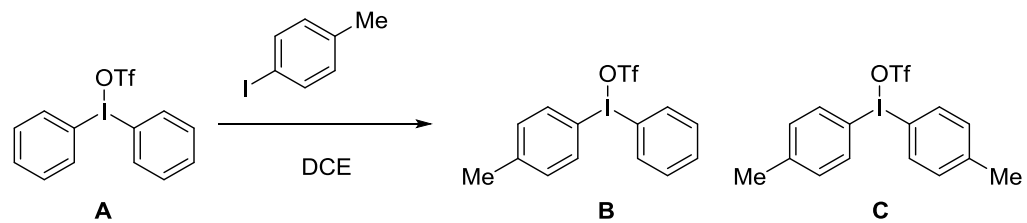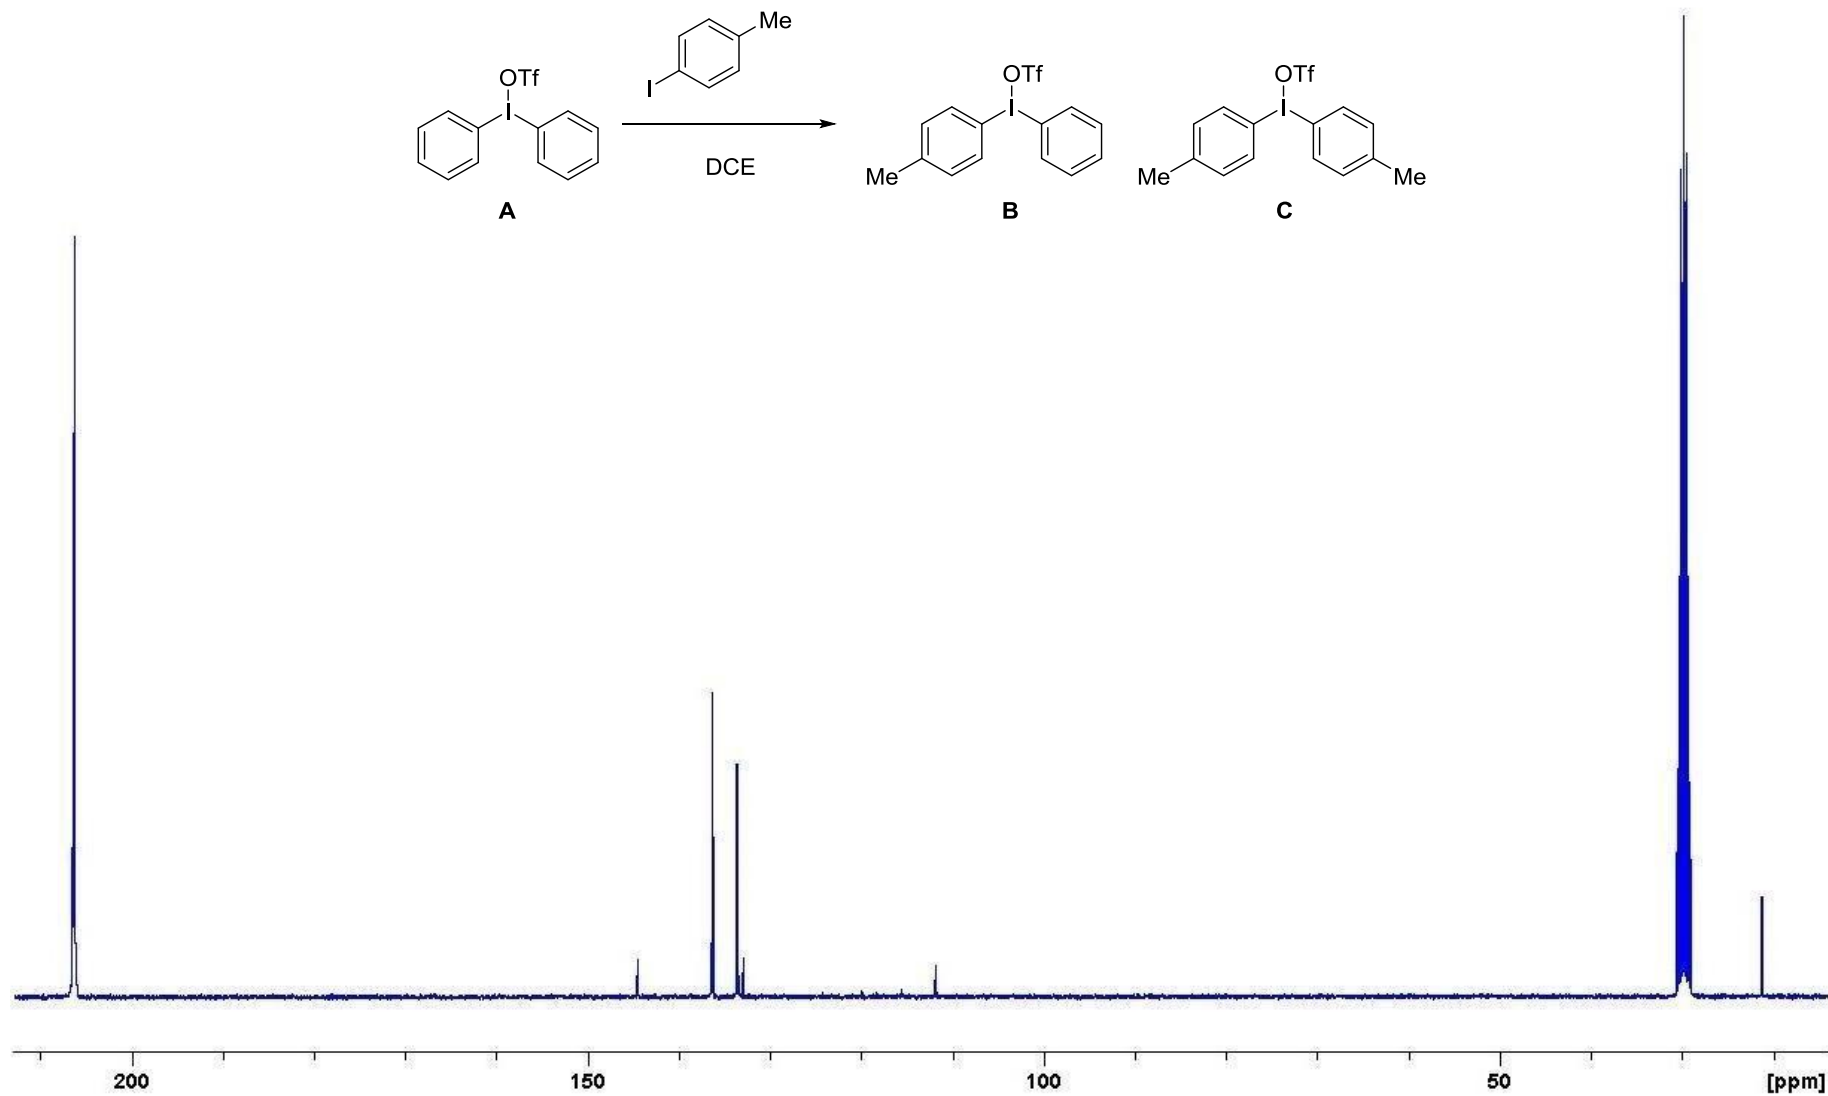

$^{13}\text{C}$  NMR spectrum of the product mixture obtained in entry a of Table 1 (acetone- $d_6$ )

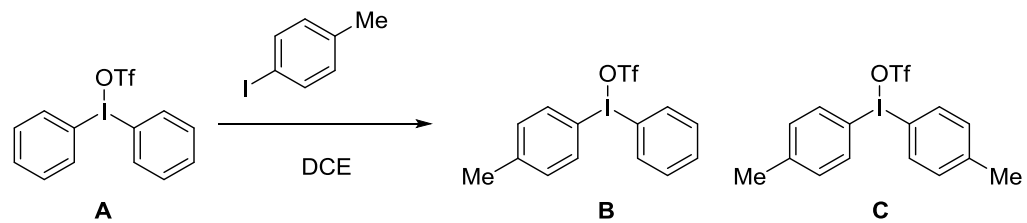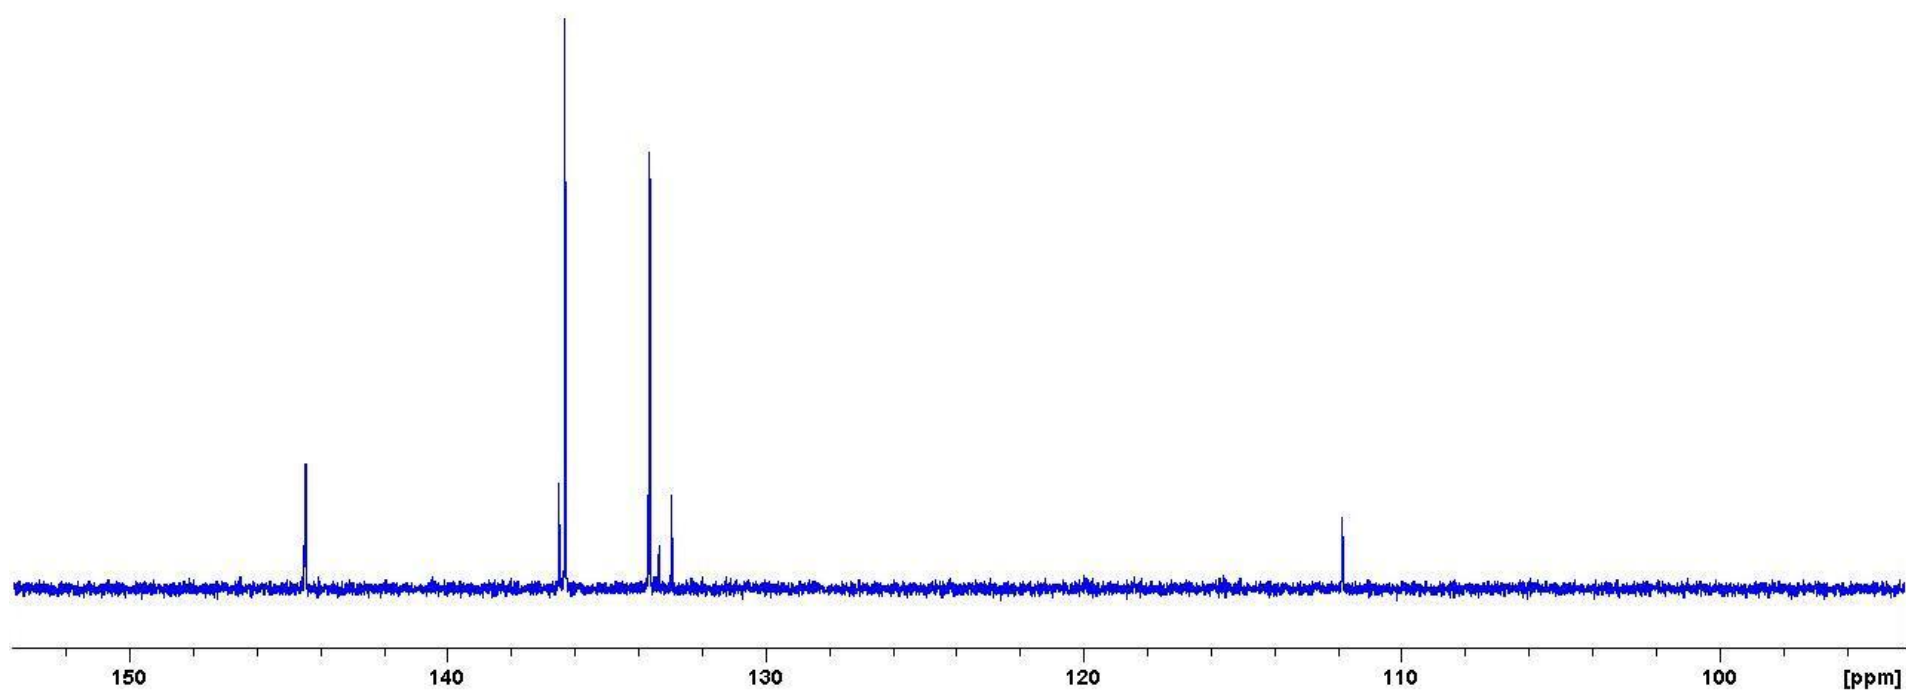

Expanded  $^{13}\text{C}$  NMR spectrum of the product mixture obtained in entry a of Table 1 (acetone- $d_6$ )

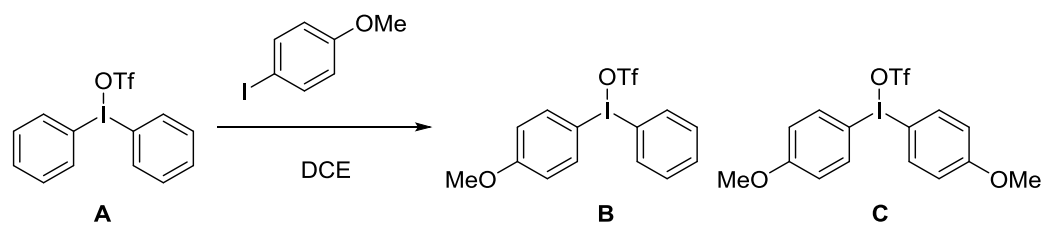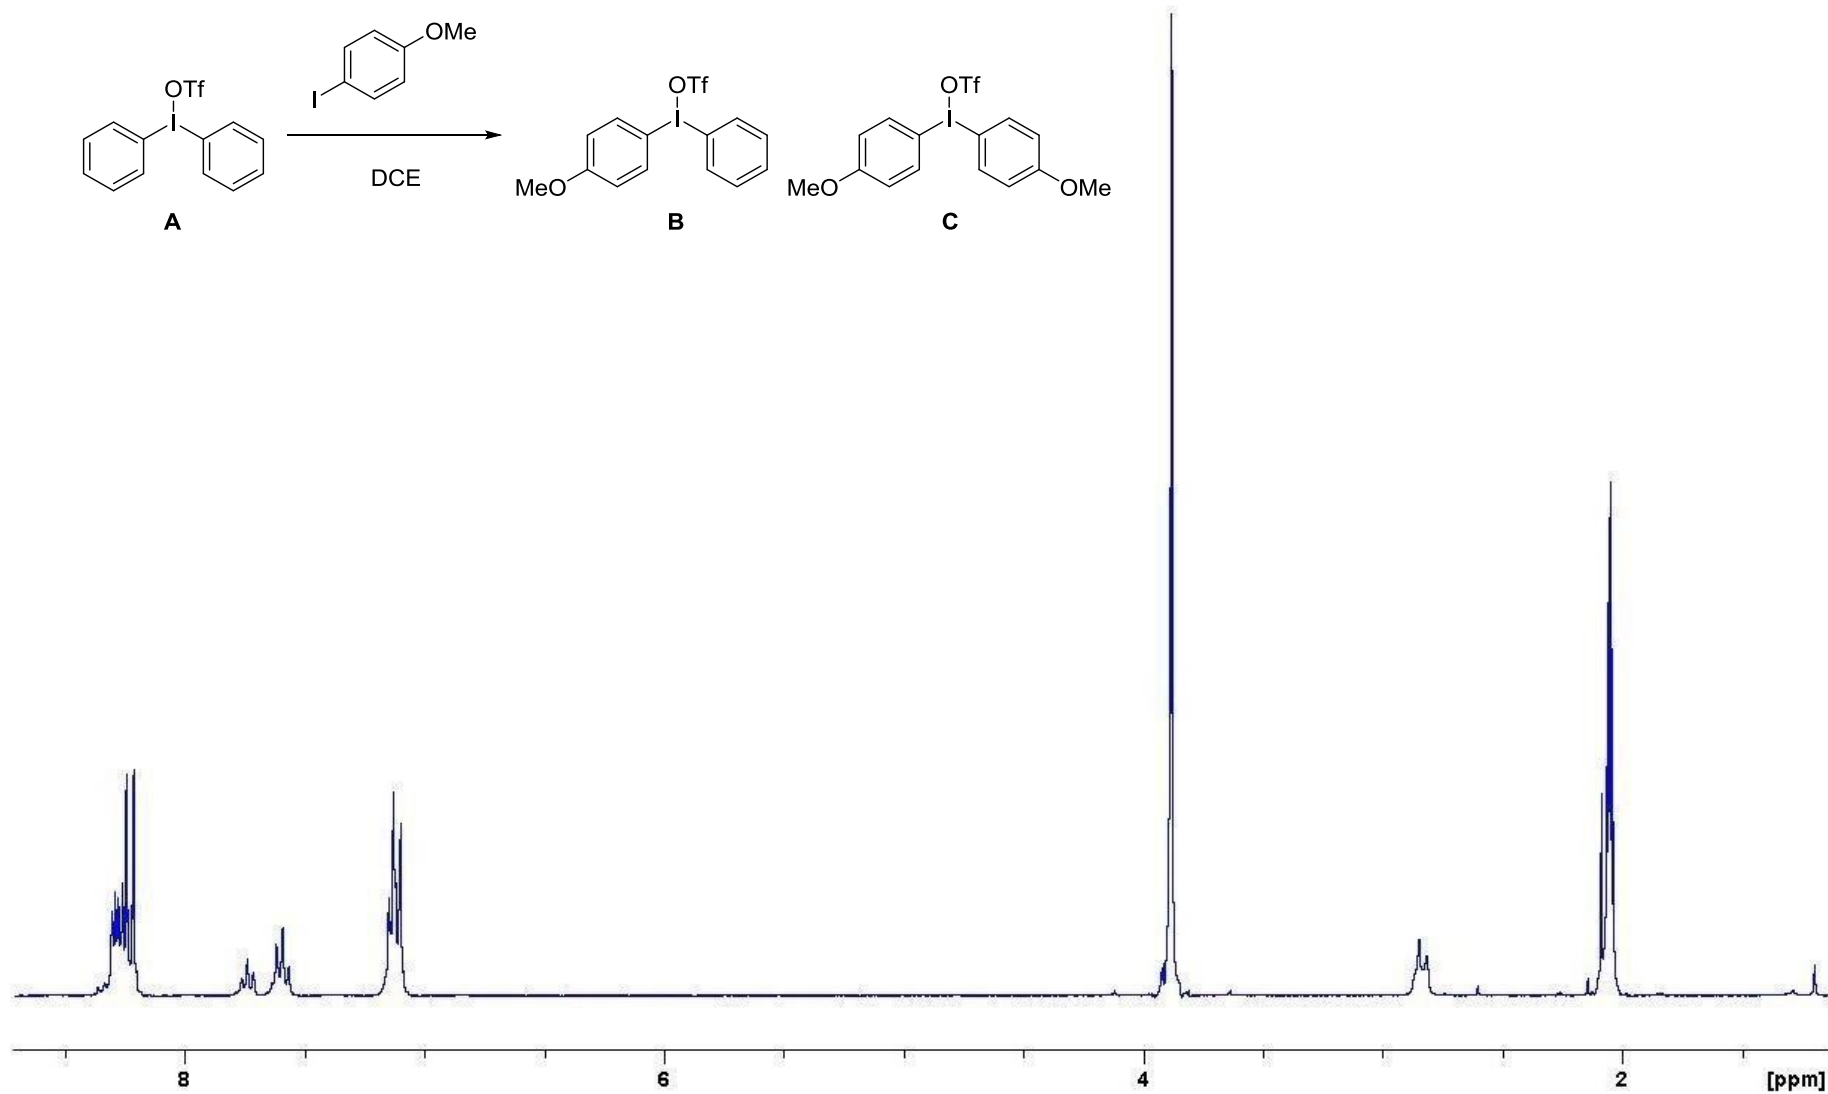

$^1\text{H}$  NMR spectrum of the product mixture obtained in entry b of Table 1 (acetone- $d_6$ )

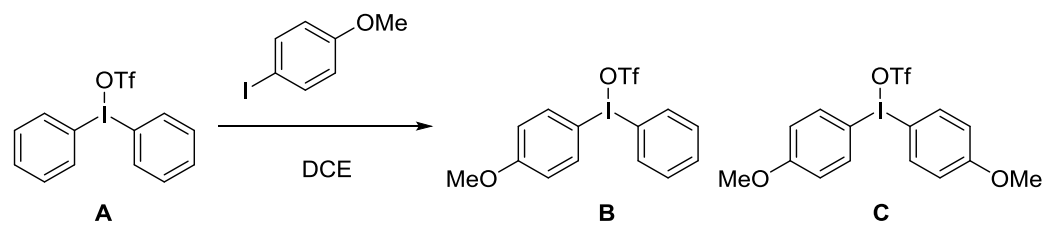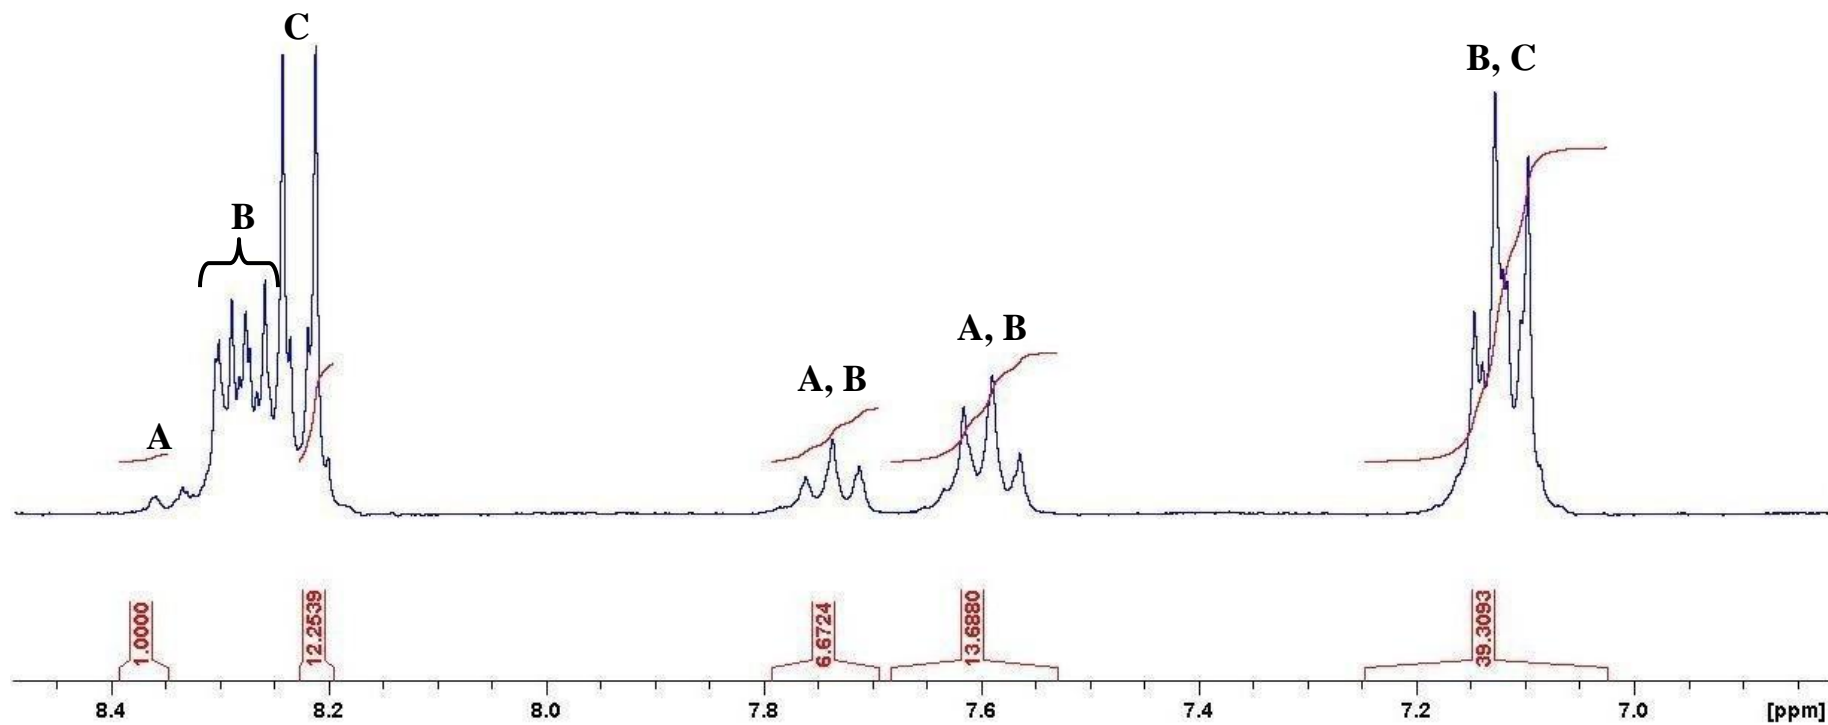

Expanded  $^1\text{H}$  NMR spectrum of the product mixture obtained in entry b of Table 1 (acetone- $d_6$ )

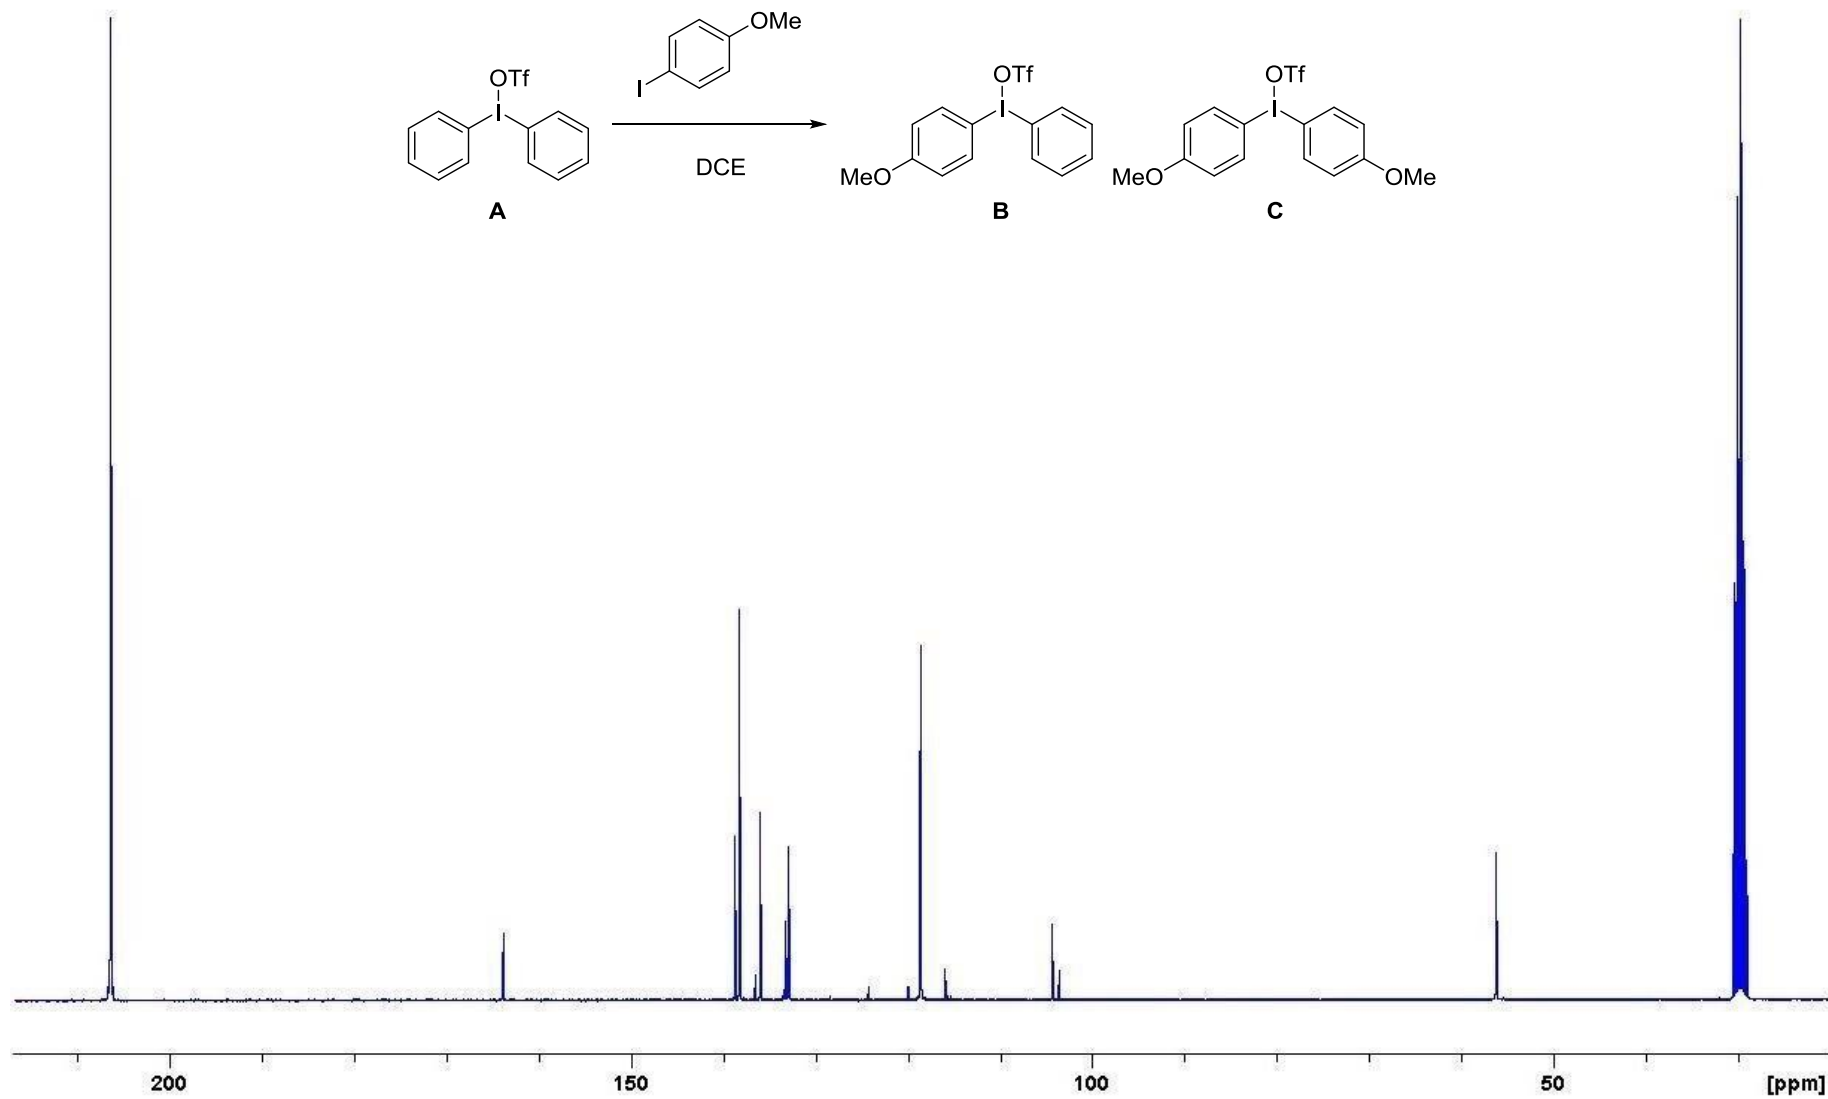

$^{13}\text{C}$  NMR spectrum of the product mixture obtained in entry b of Table 1 (acetone- $d_6$ )



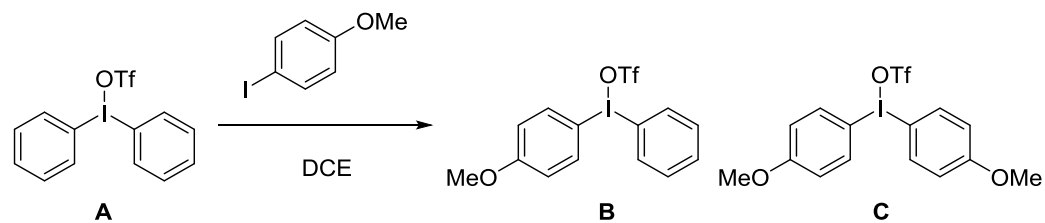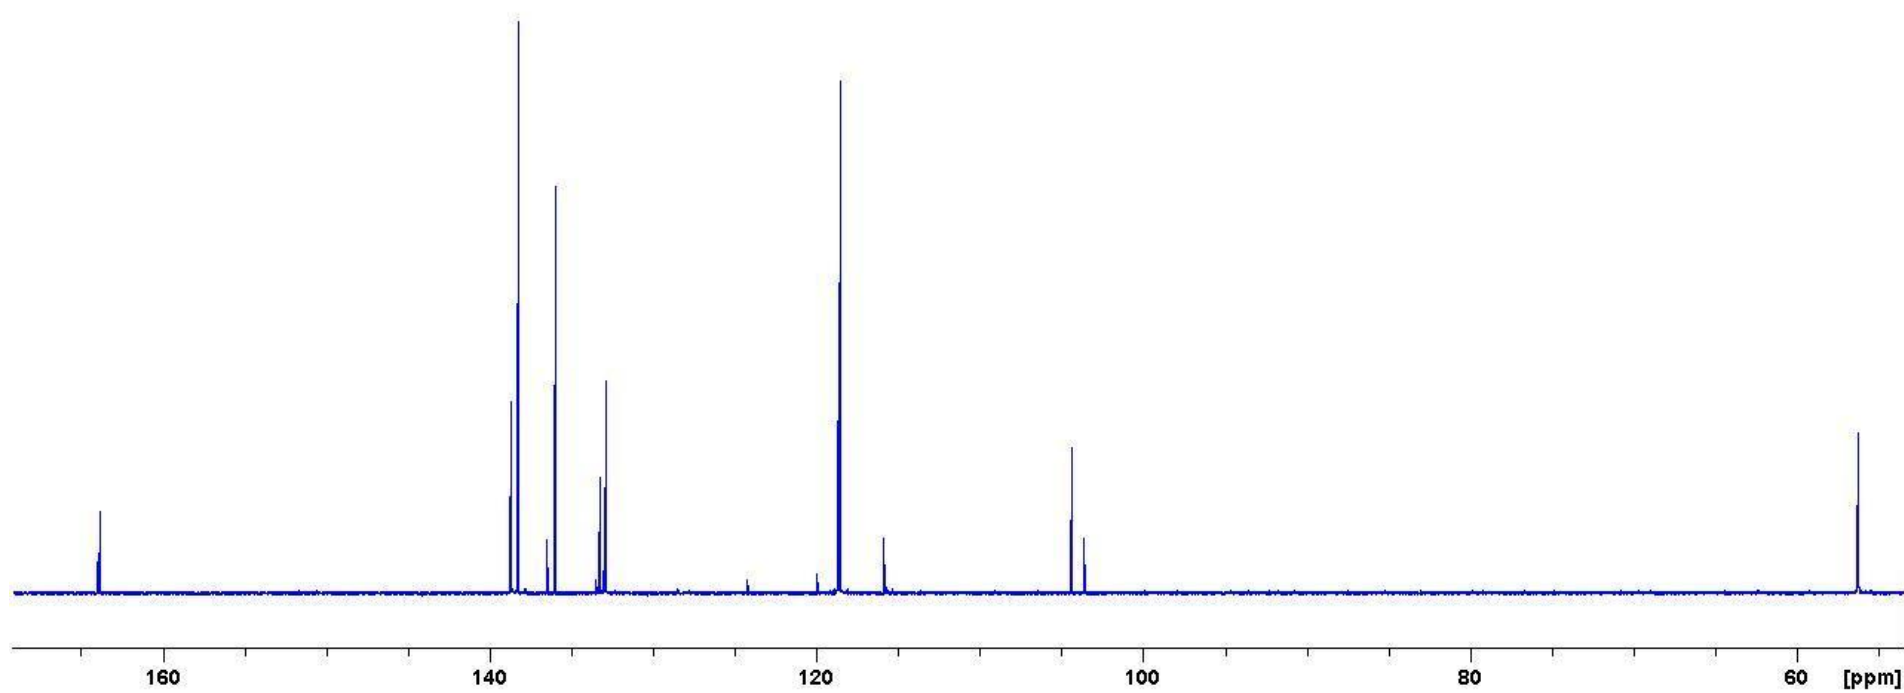

Expanded  $^{13}\text{C}$  NMR spectrum of the product mixture obtained in entry b of Table 1 (acetone- $d_6$ )

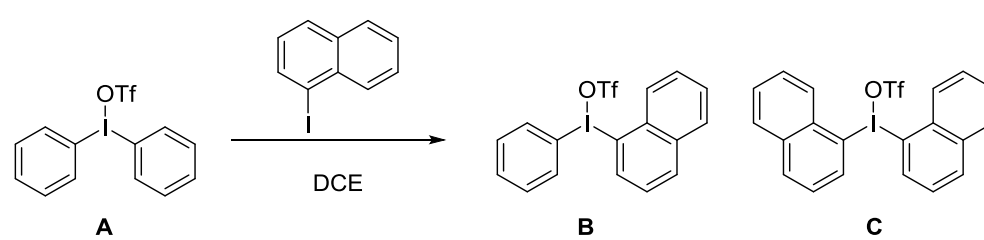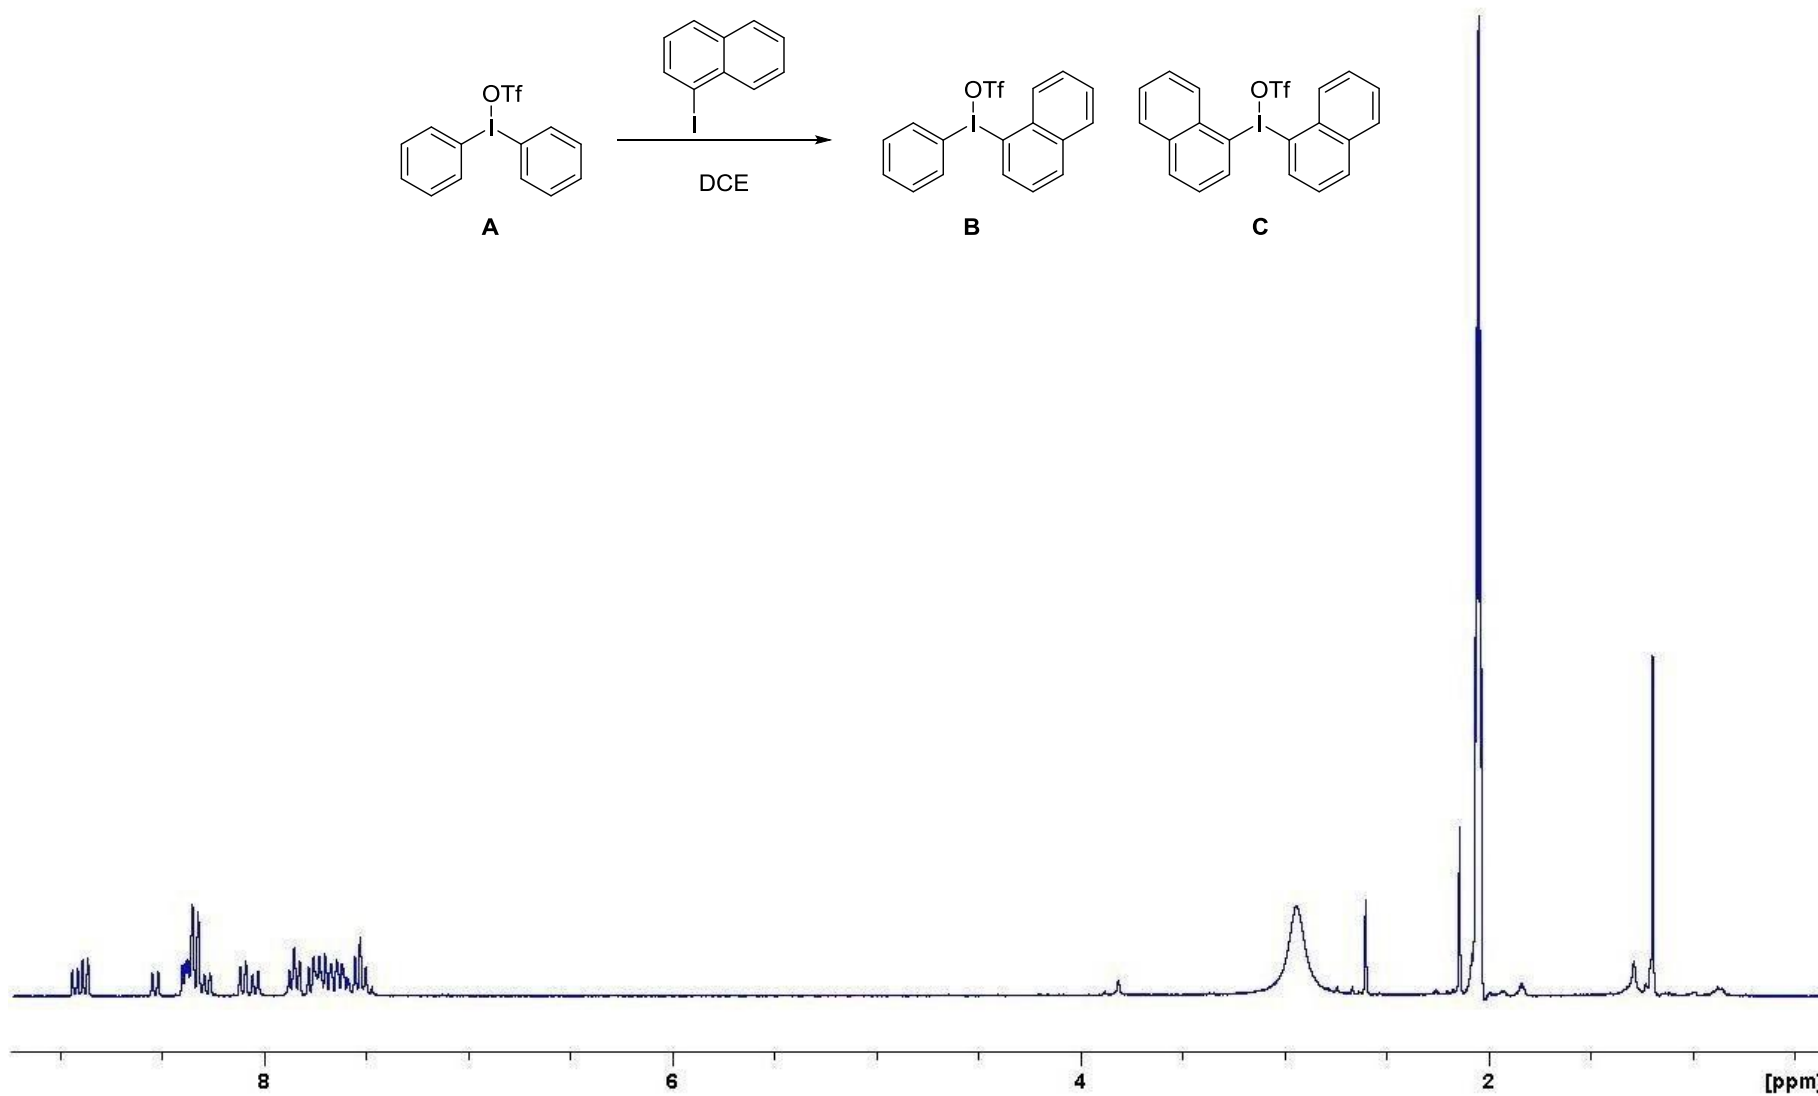

$^1\text{H}$  NMR spectrum of the product mixture obtained in entry c of Table 1 (acetone- $d_6$ )

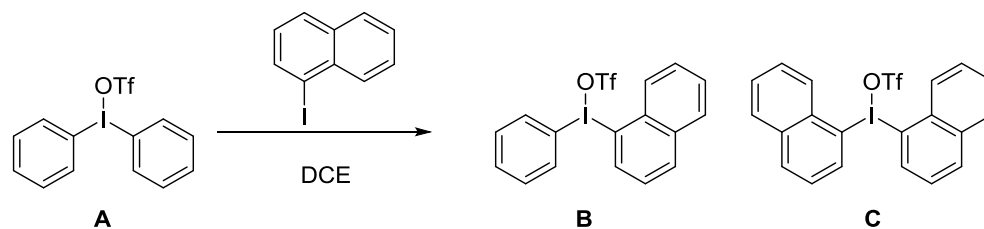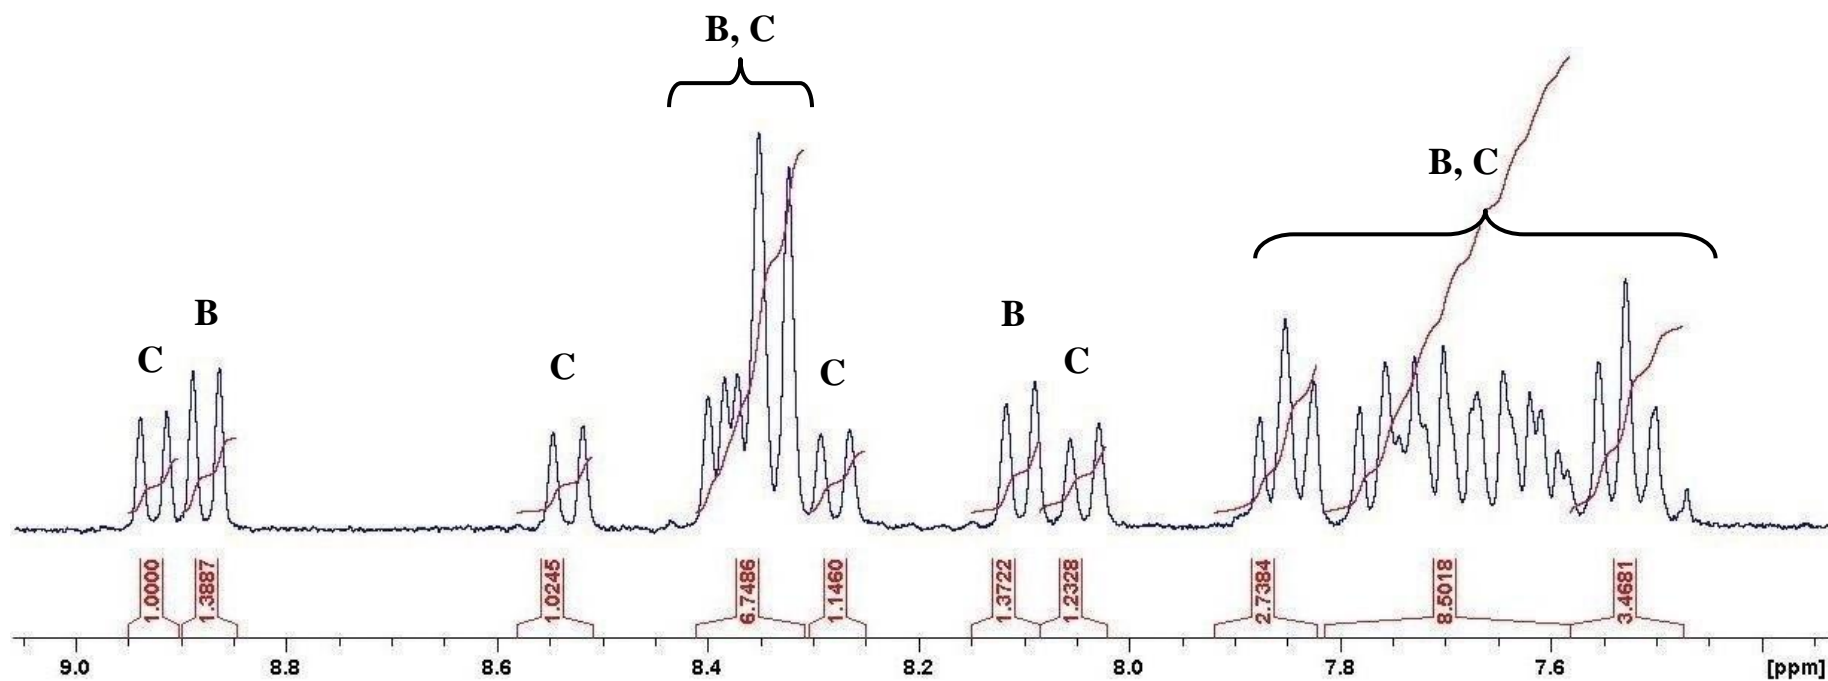

Expanded  $^1\text{H}$  NMR spectrum of the product mixture obtained in entry c of Table 1 (acetone- $d_6$ )

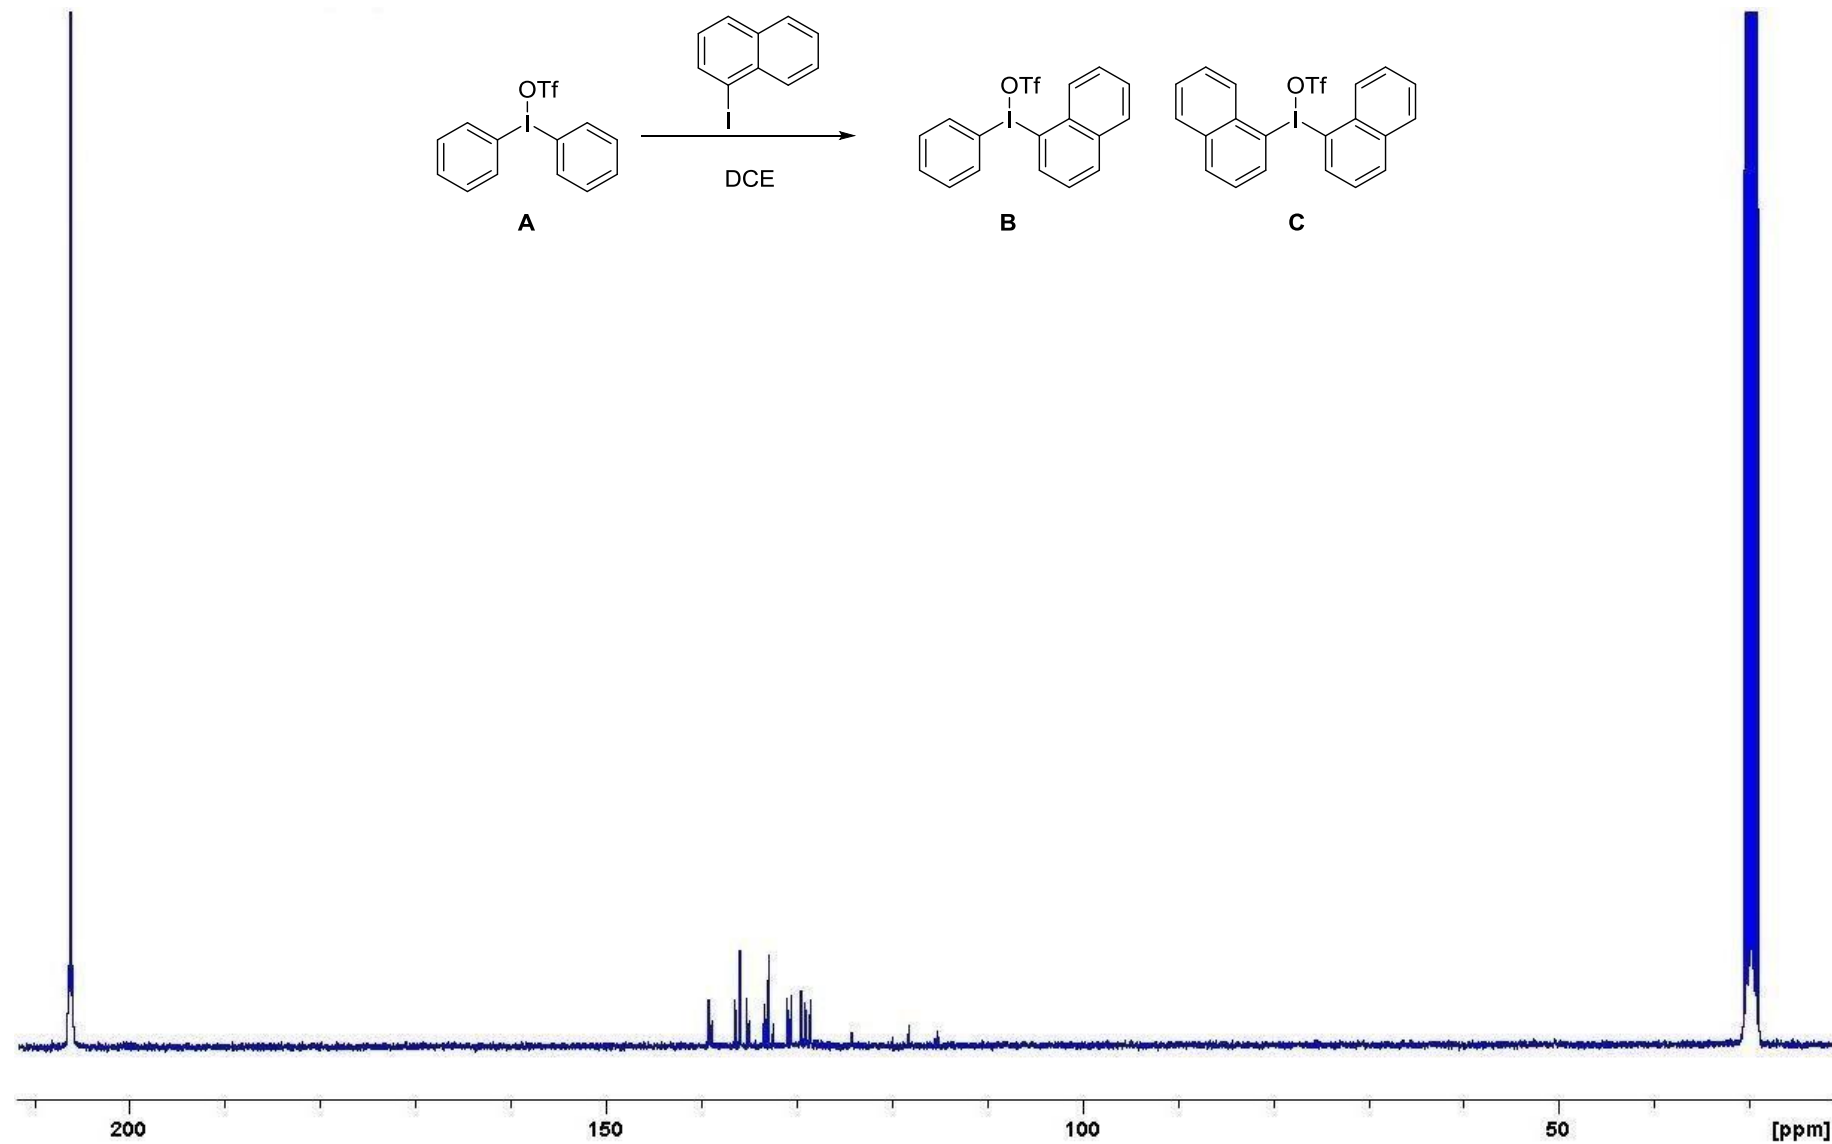

$^{13}\text{C}$  NMR spectrum of the product mixture obtained in entry c of Table 1 (acetone- $d_6$ )

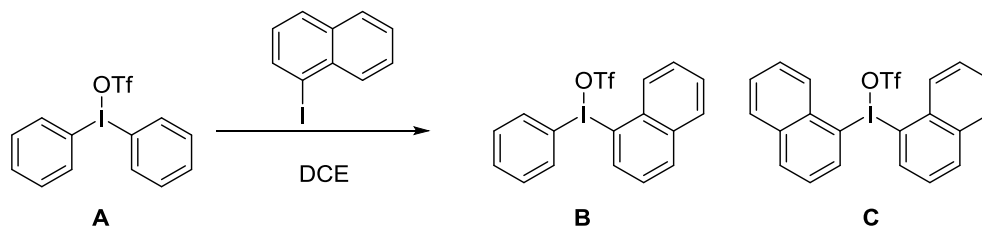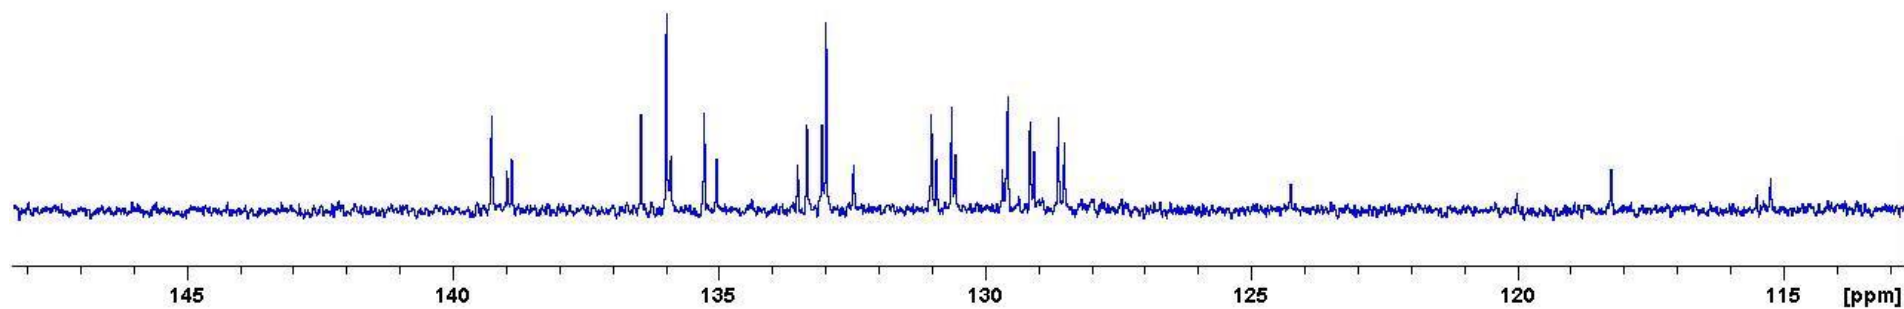

Expanded  $^{13}\text{C}$  NMR spectrum of the product mixture obtained in entry c of Table 1 (acetone- $d_6$ )

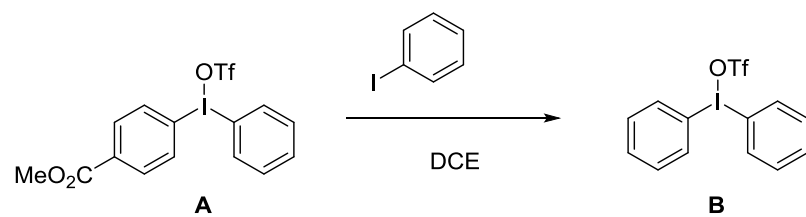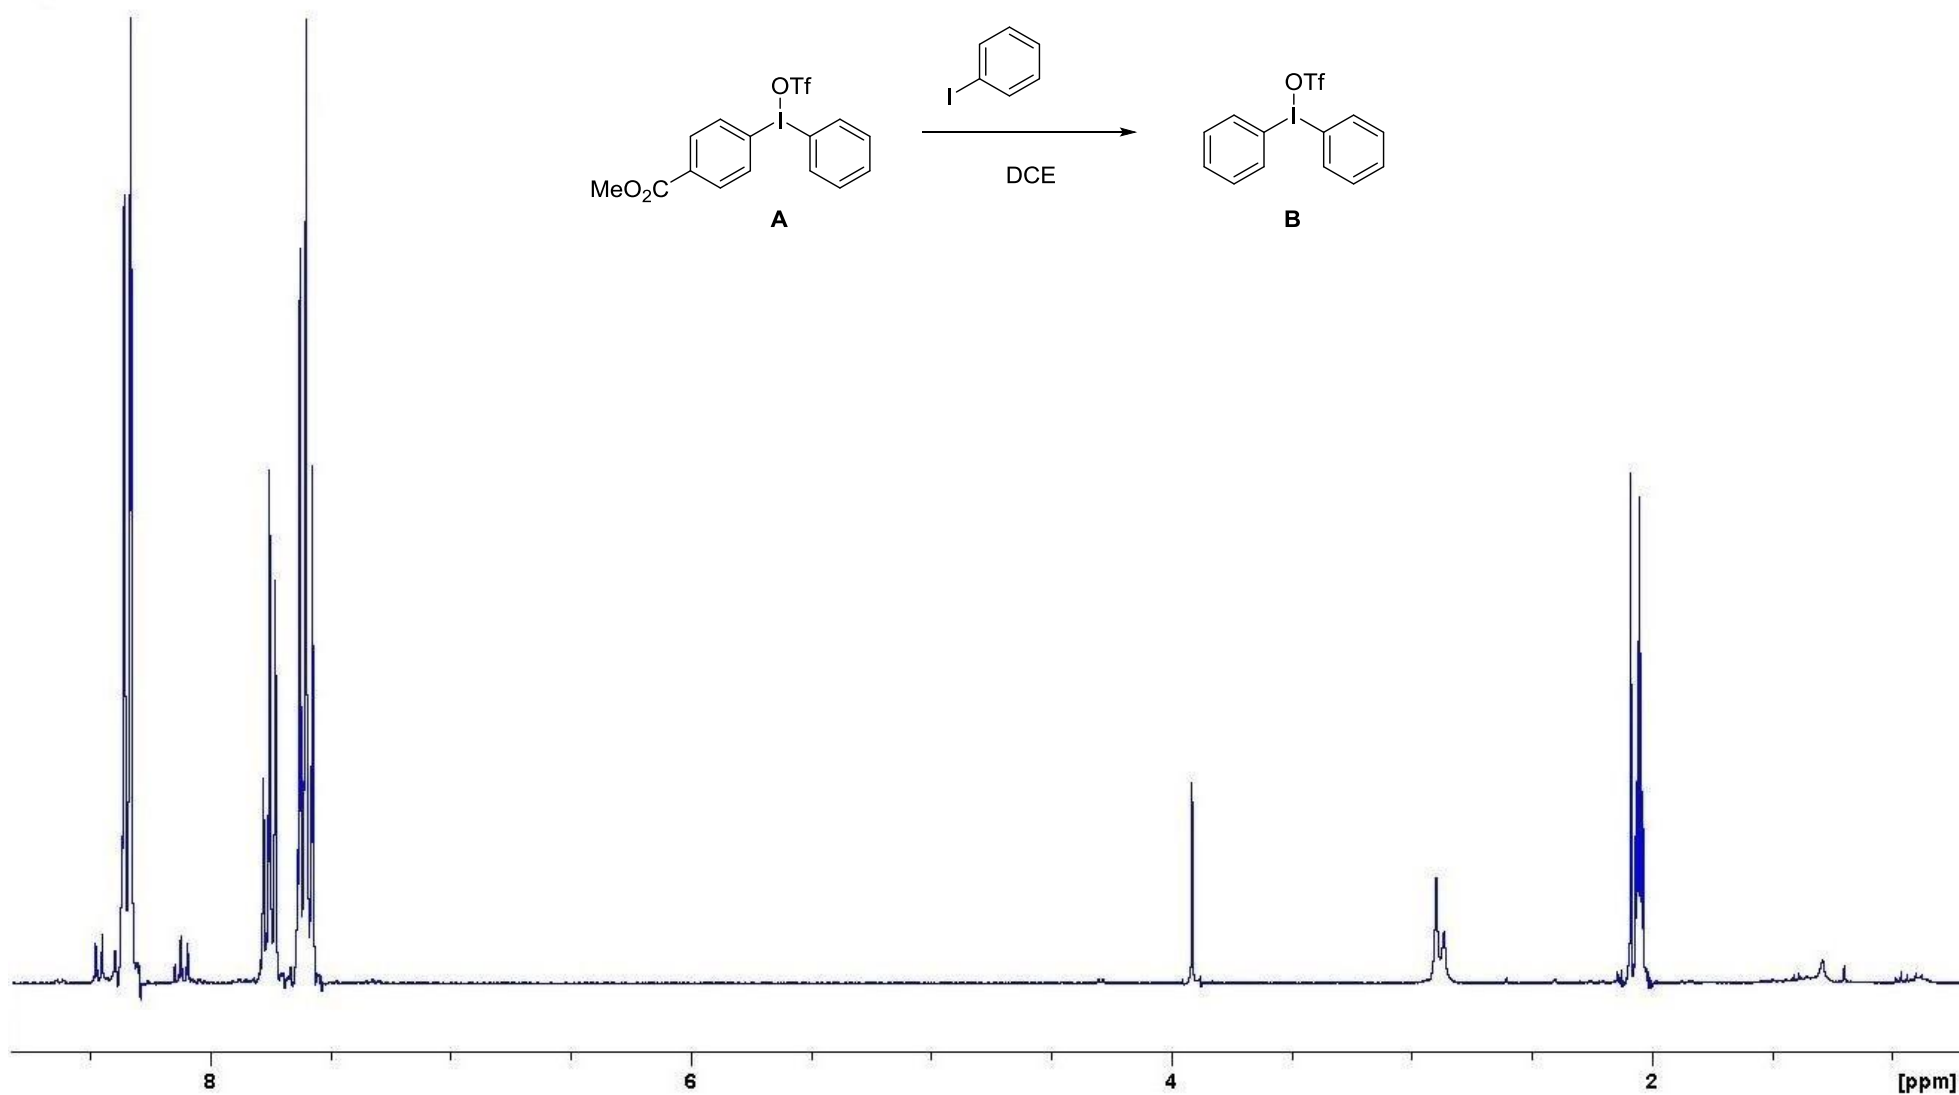

$^1\text{H}$  NMR spectrum of the product mixture obtained in entry a of Table 2 (acetone- $d_6$ )

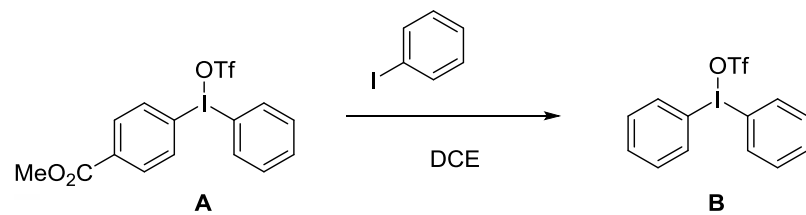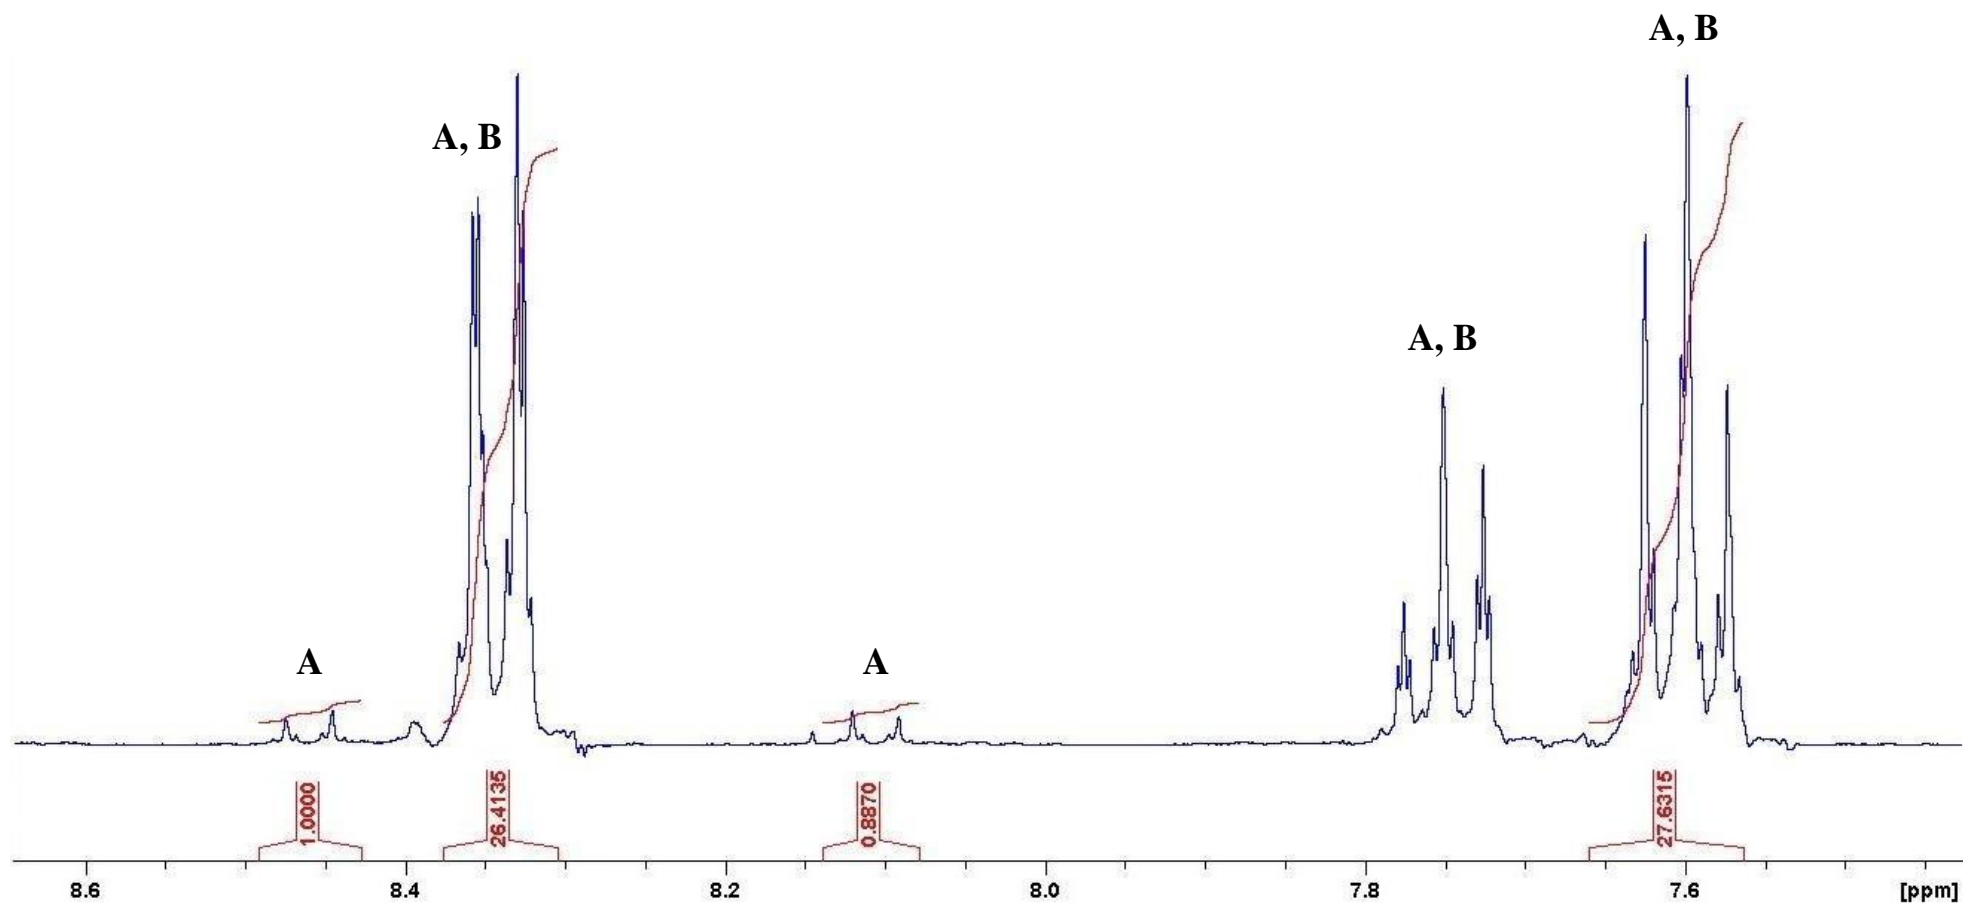

Expanded  $^1\text{H}$  NMR spectrum of the product mixture obtained in entry a of Table 2 (acetone- $d_6$ )

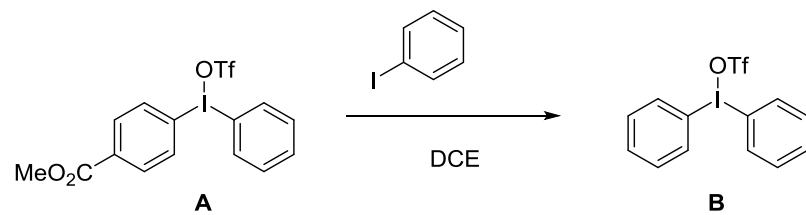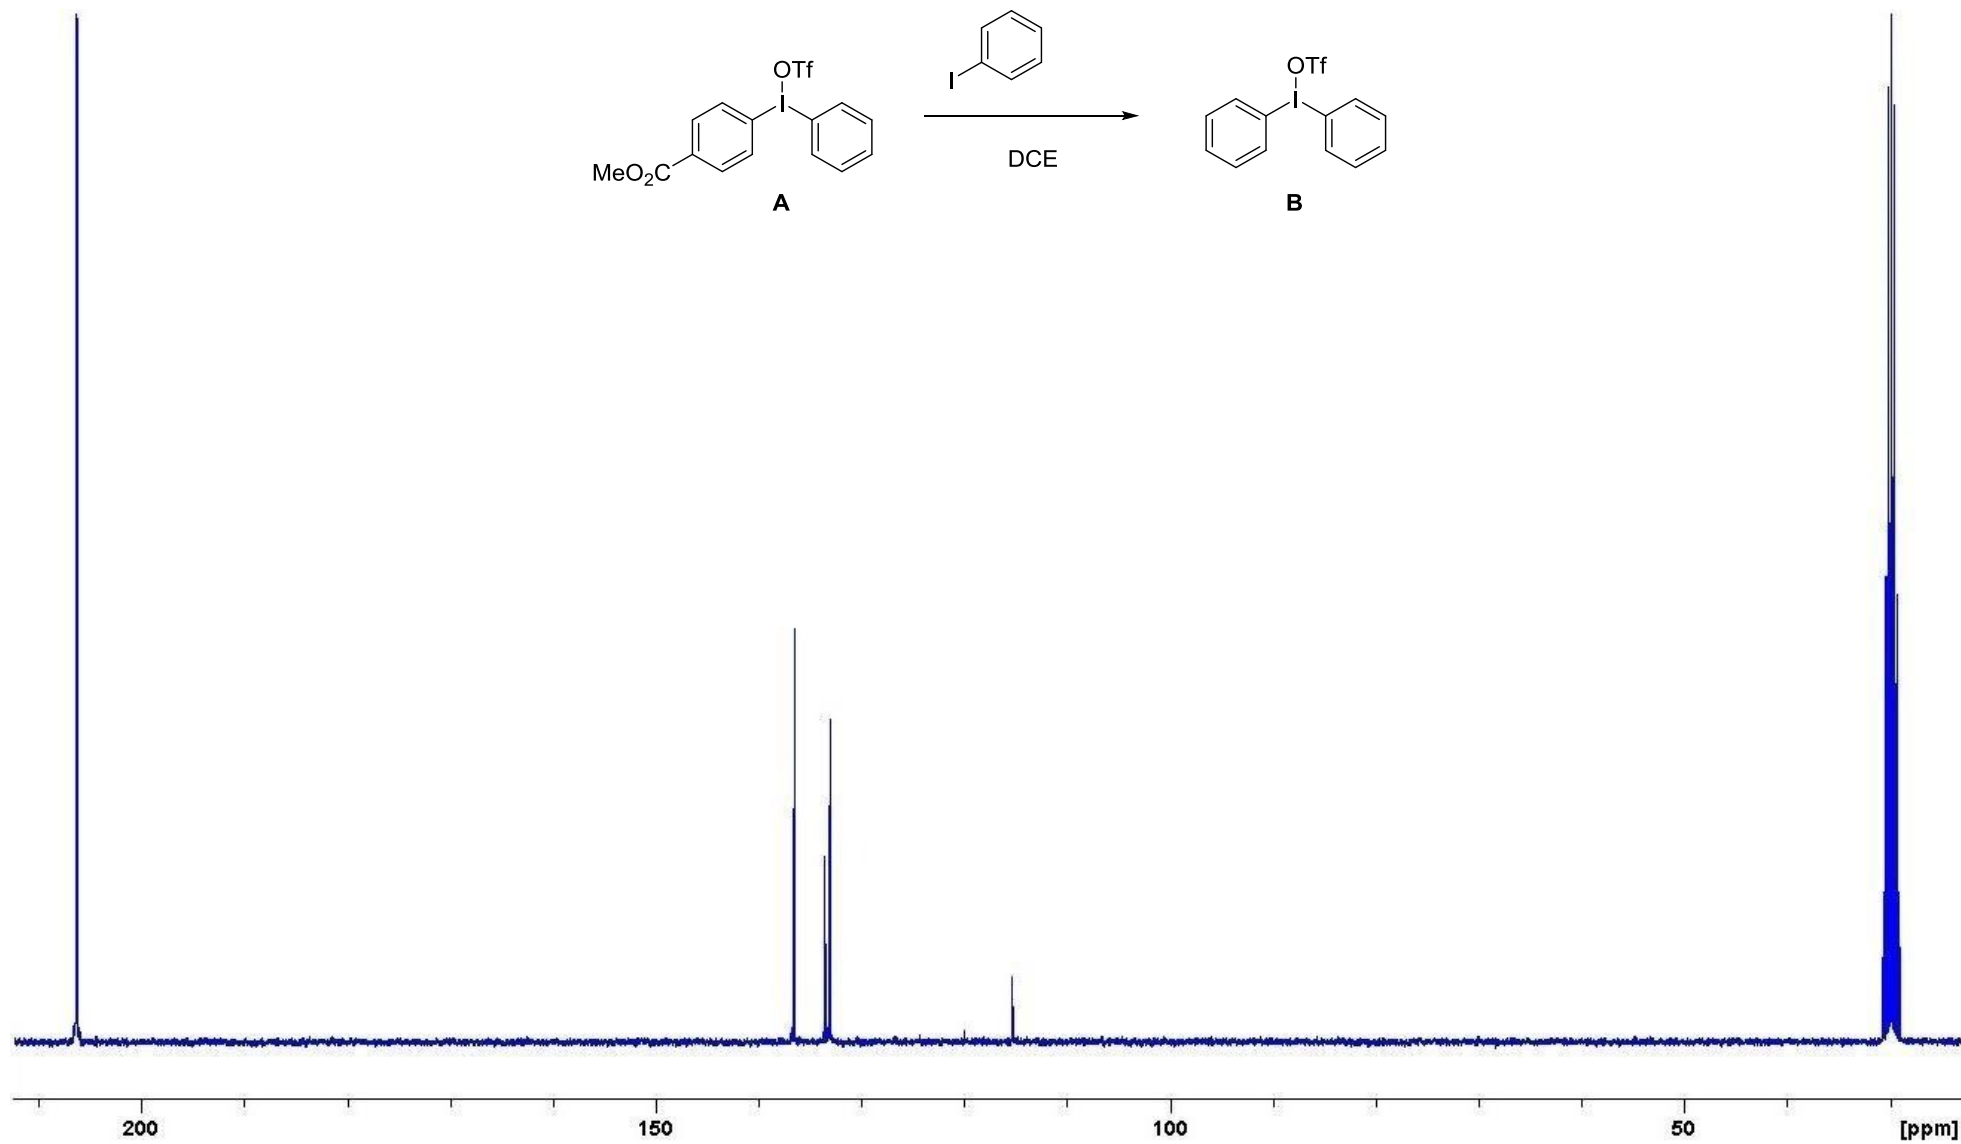

<sup>13</sup>C NMR spectrum of the product mixture obtained in entry a of Table 2 (acetone-*d*<sub>6</sub>)



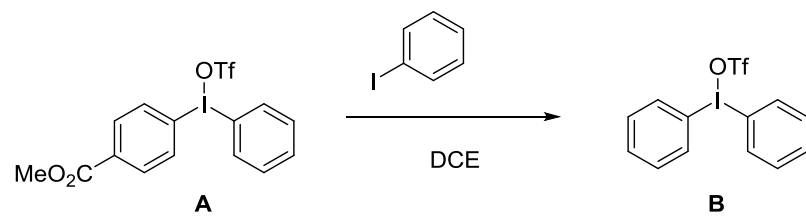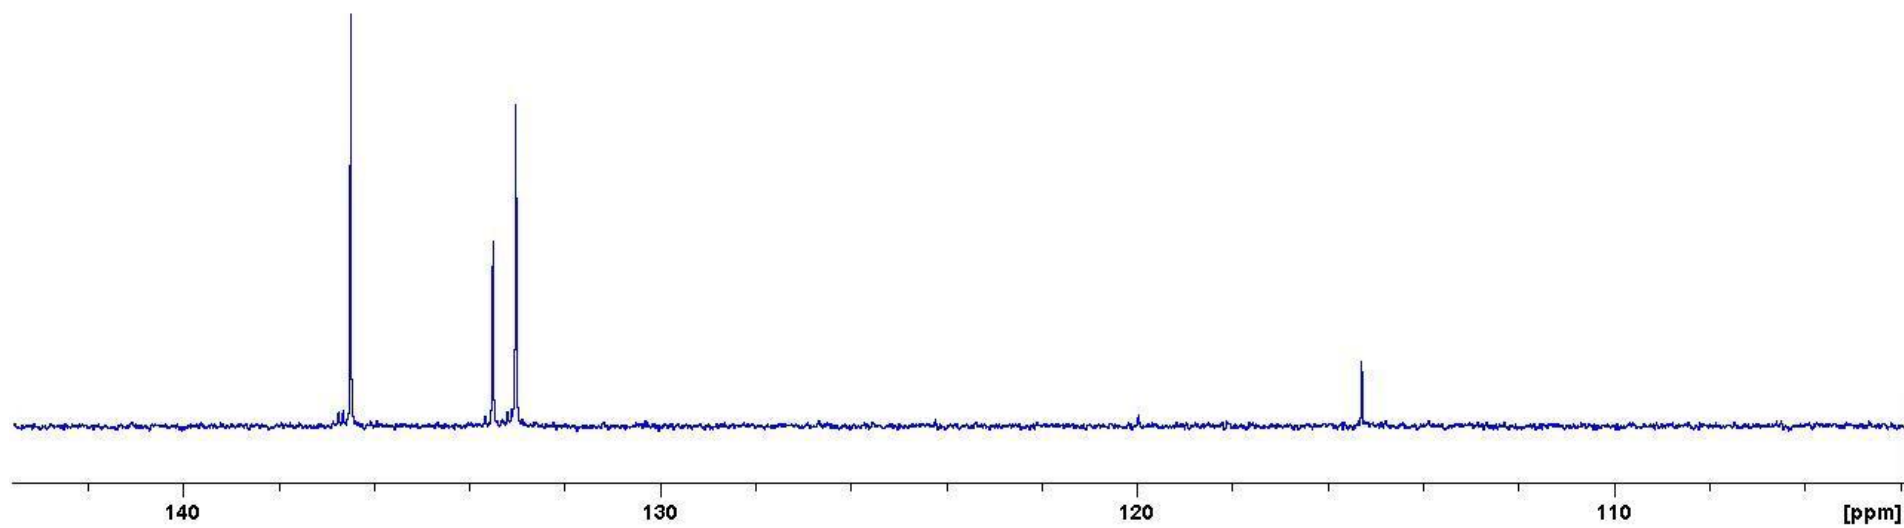

Expanded  $^{13}\text{C}$  NMR spectrum of the product mixture obtained in entry a of Table 2 (acetone- $d_6$ )

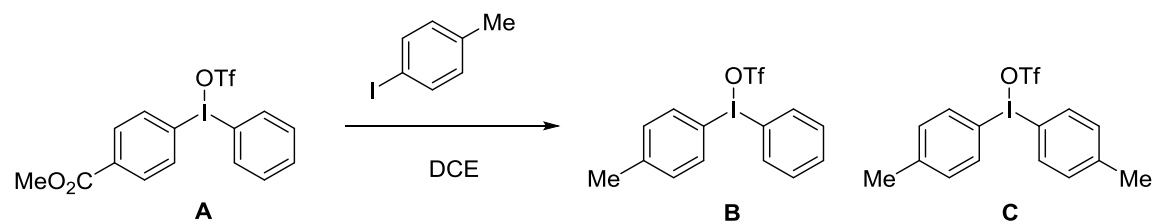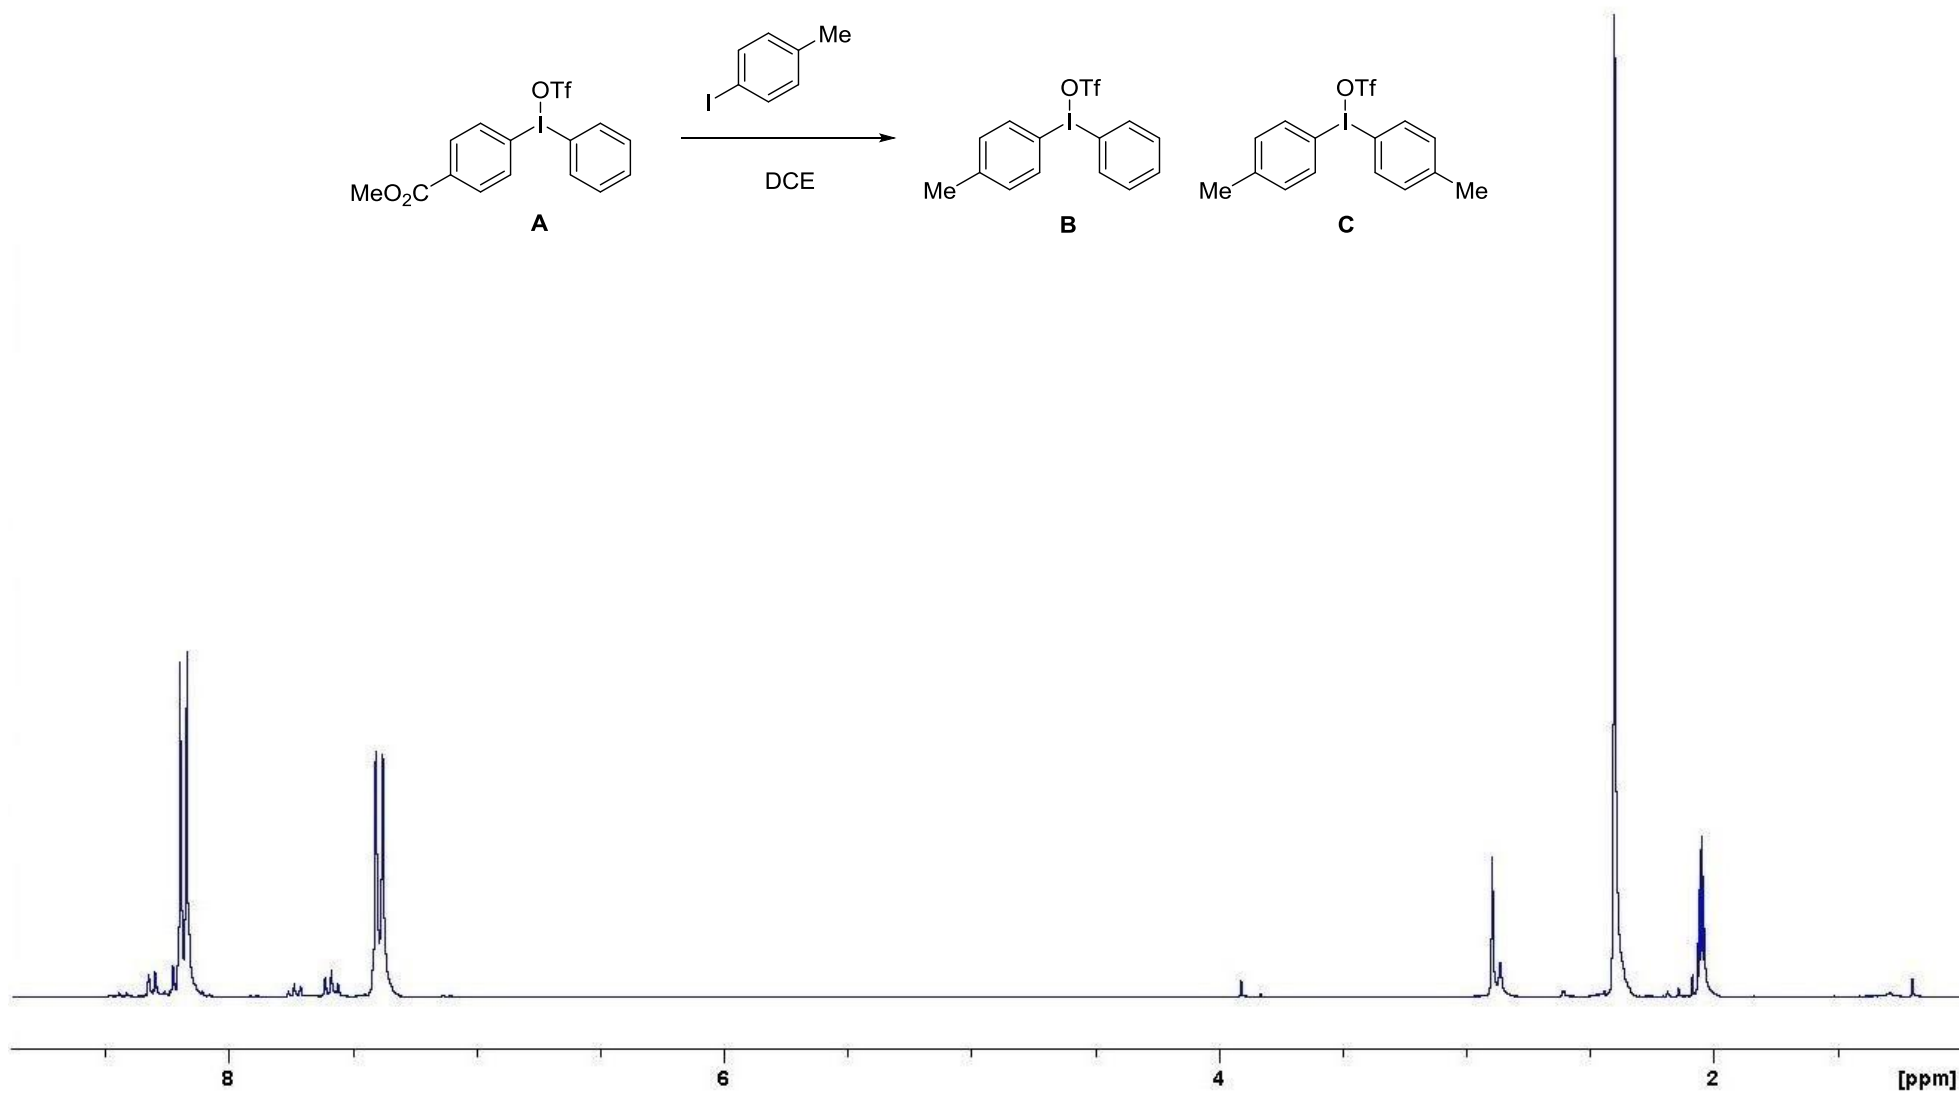

$^1\text{H}$  NMR spectrum of the product mixture obtained in entry b of Table 2 (acetone- $d_6$ )

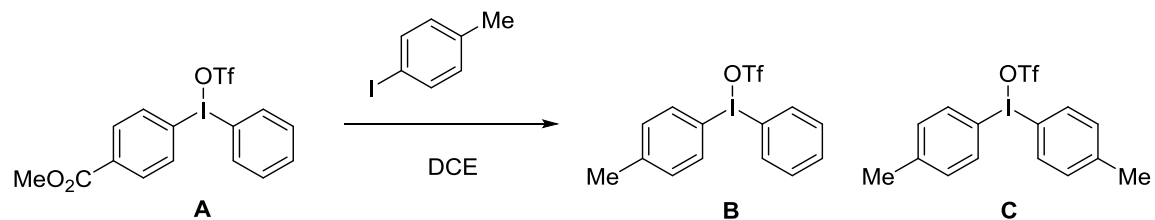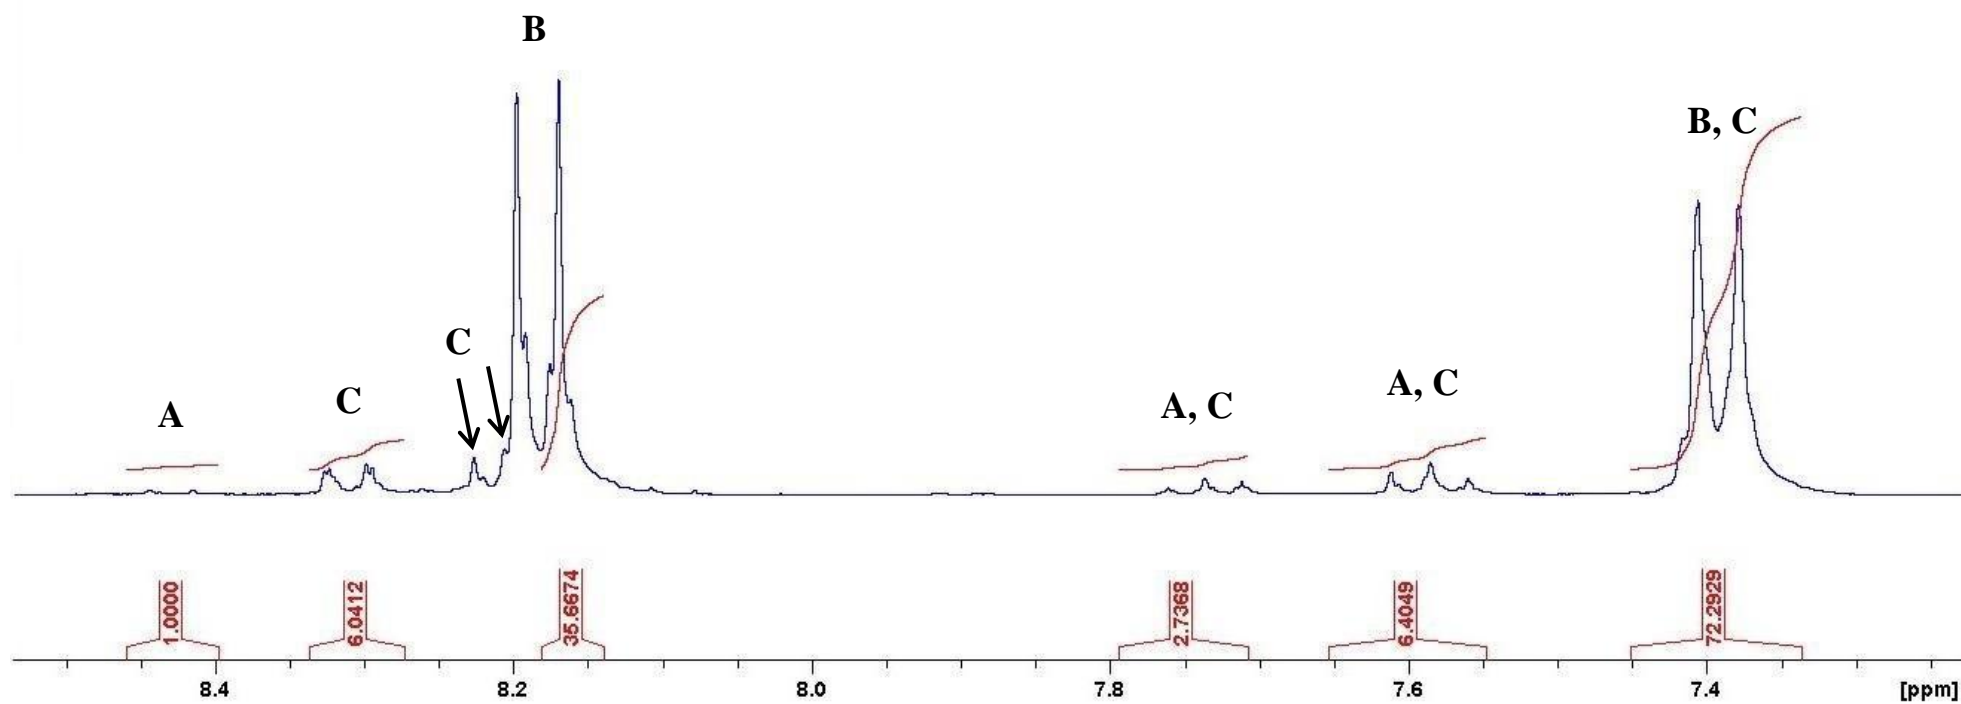

Expanded  $^1\text{H}$  NMR spectrum of the product mixture obtained in entry b of Table 2 (acetone- $d_6$ )

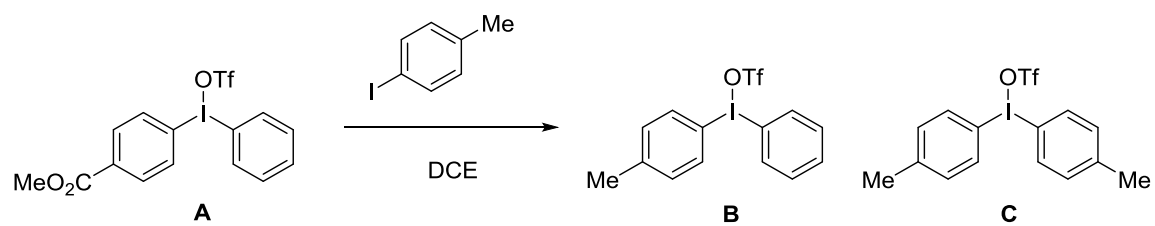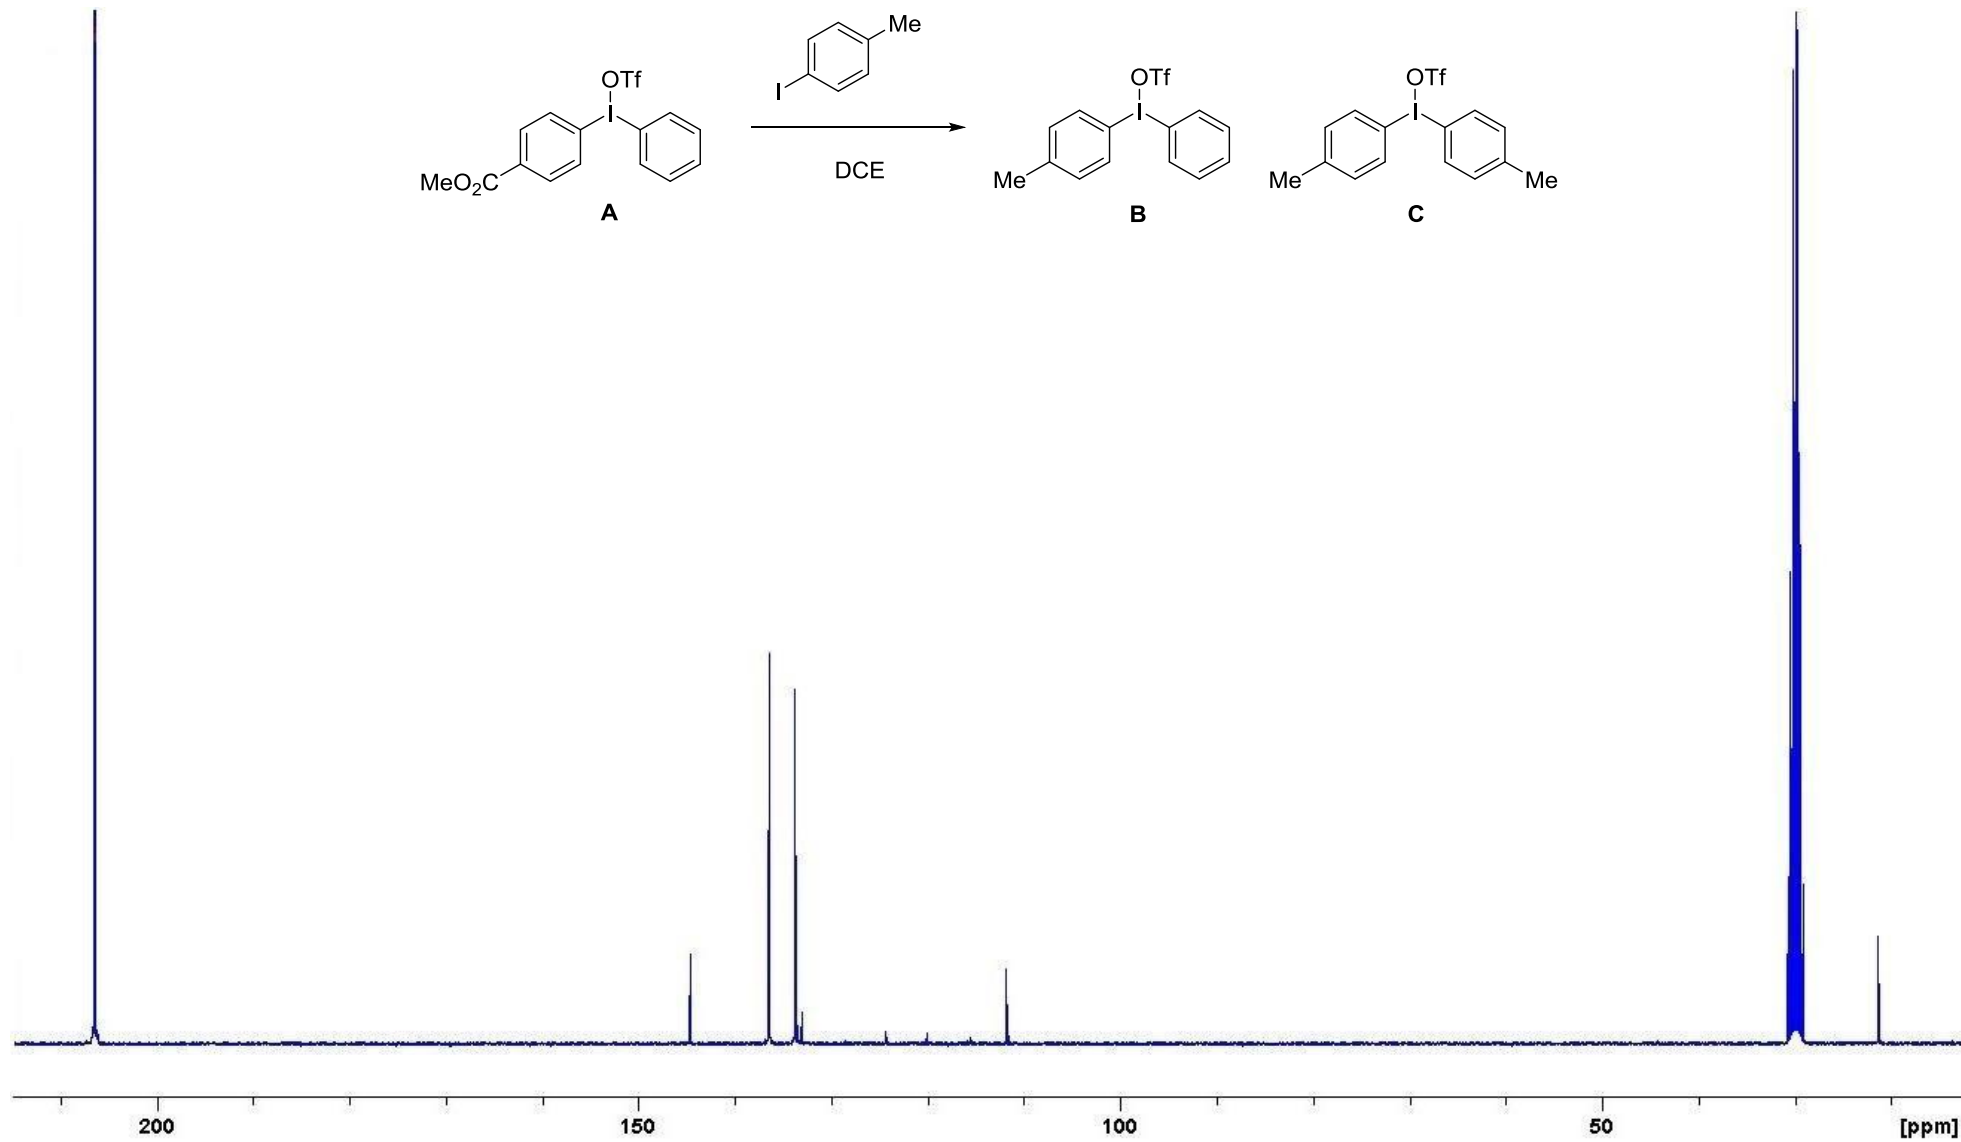

<sup>13</sup>C NMR spectrum of the product mixture obtained in entry b of Table 2 (acetone-*d*<sub>6</sub>)

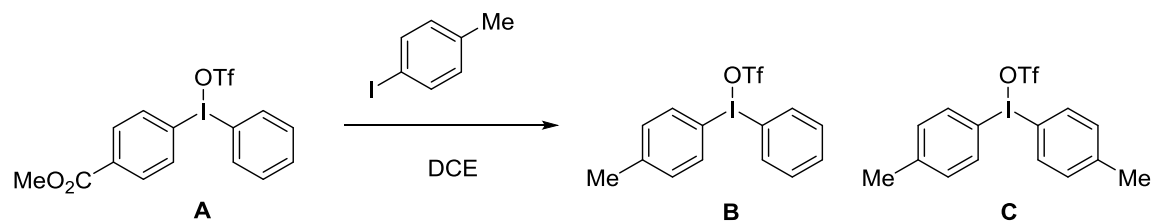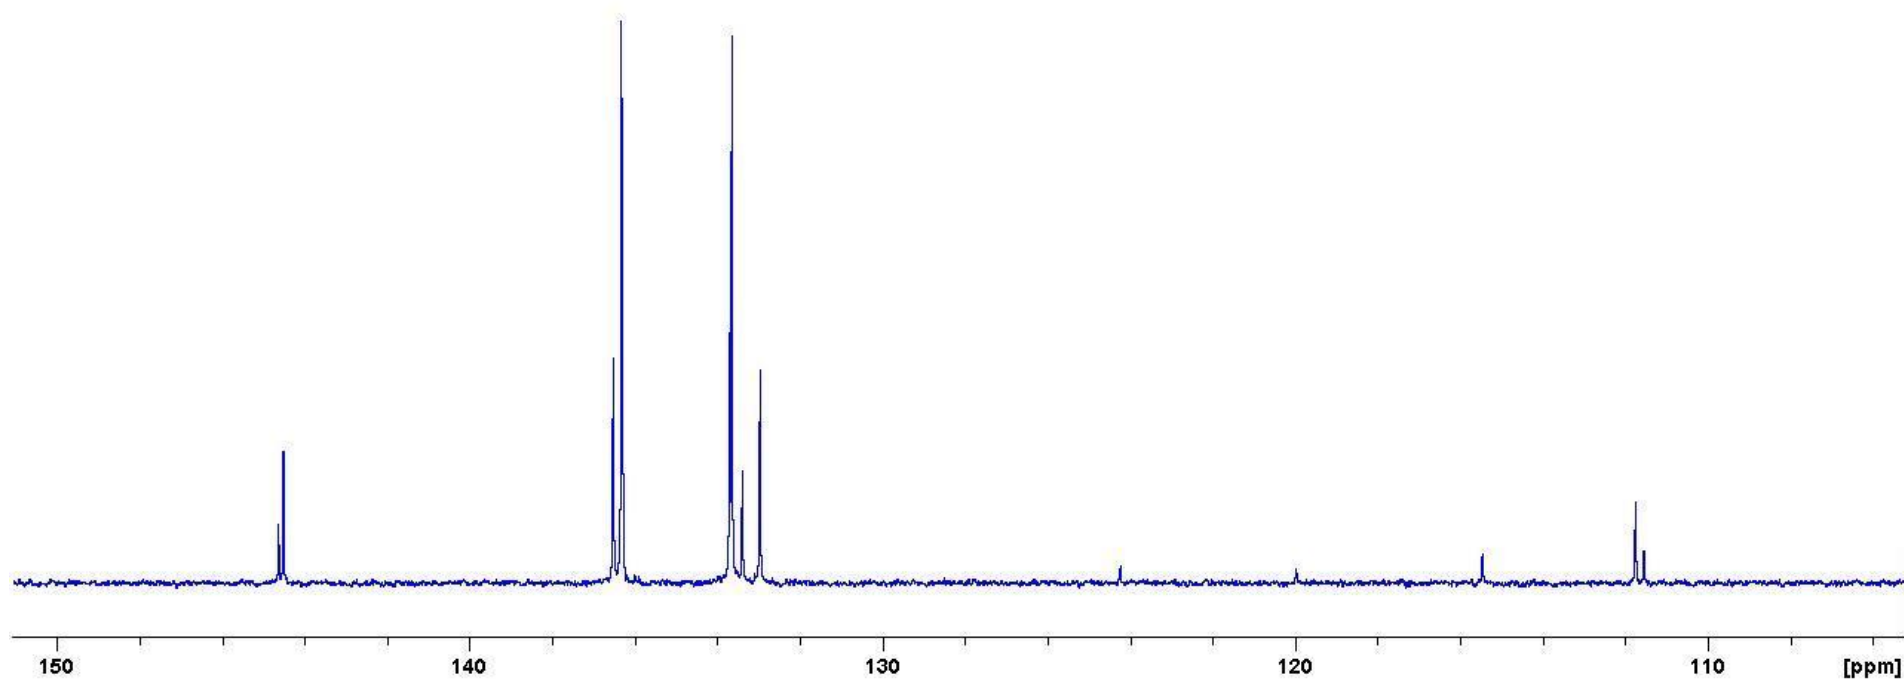

Expanded  $^{13}\text{C}$  NMR spectrum of the product mixture obtained in entry b of Table 2 (acetone- $d_6$ )

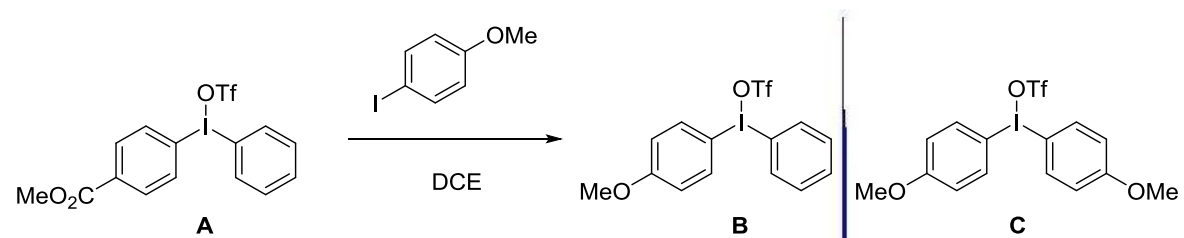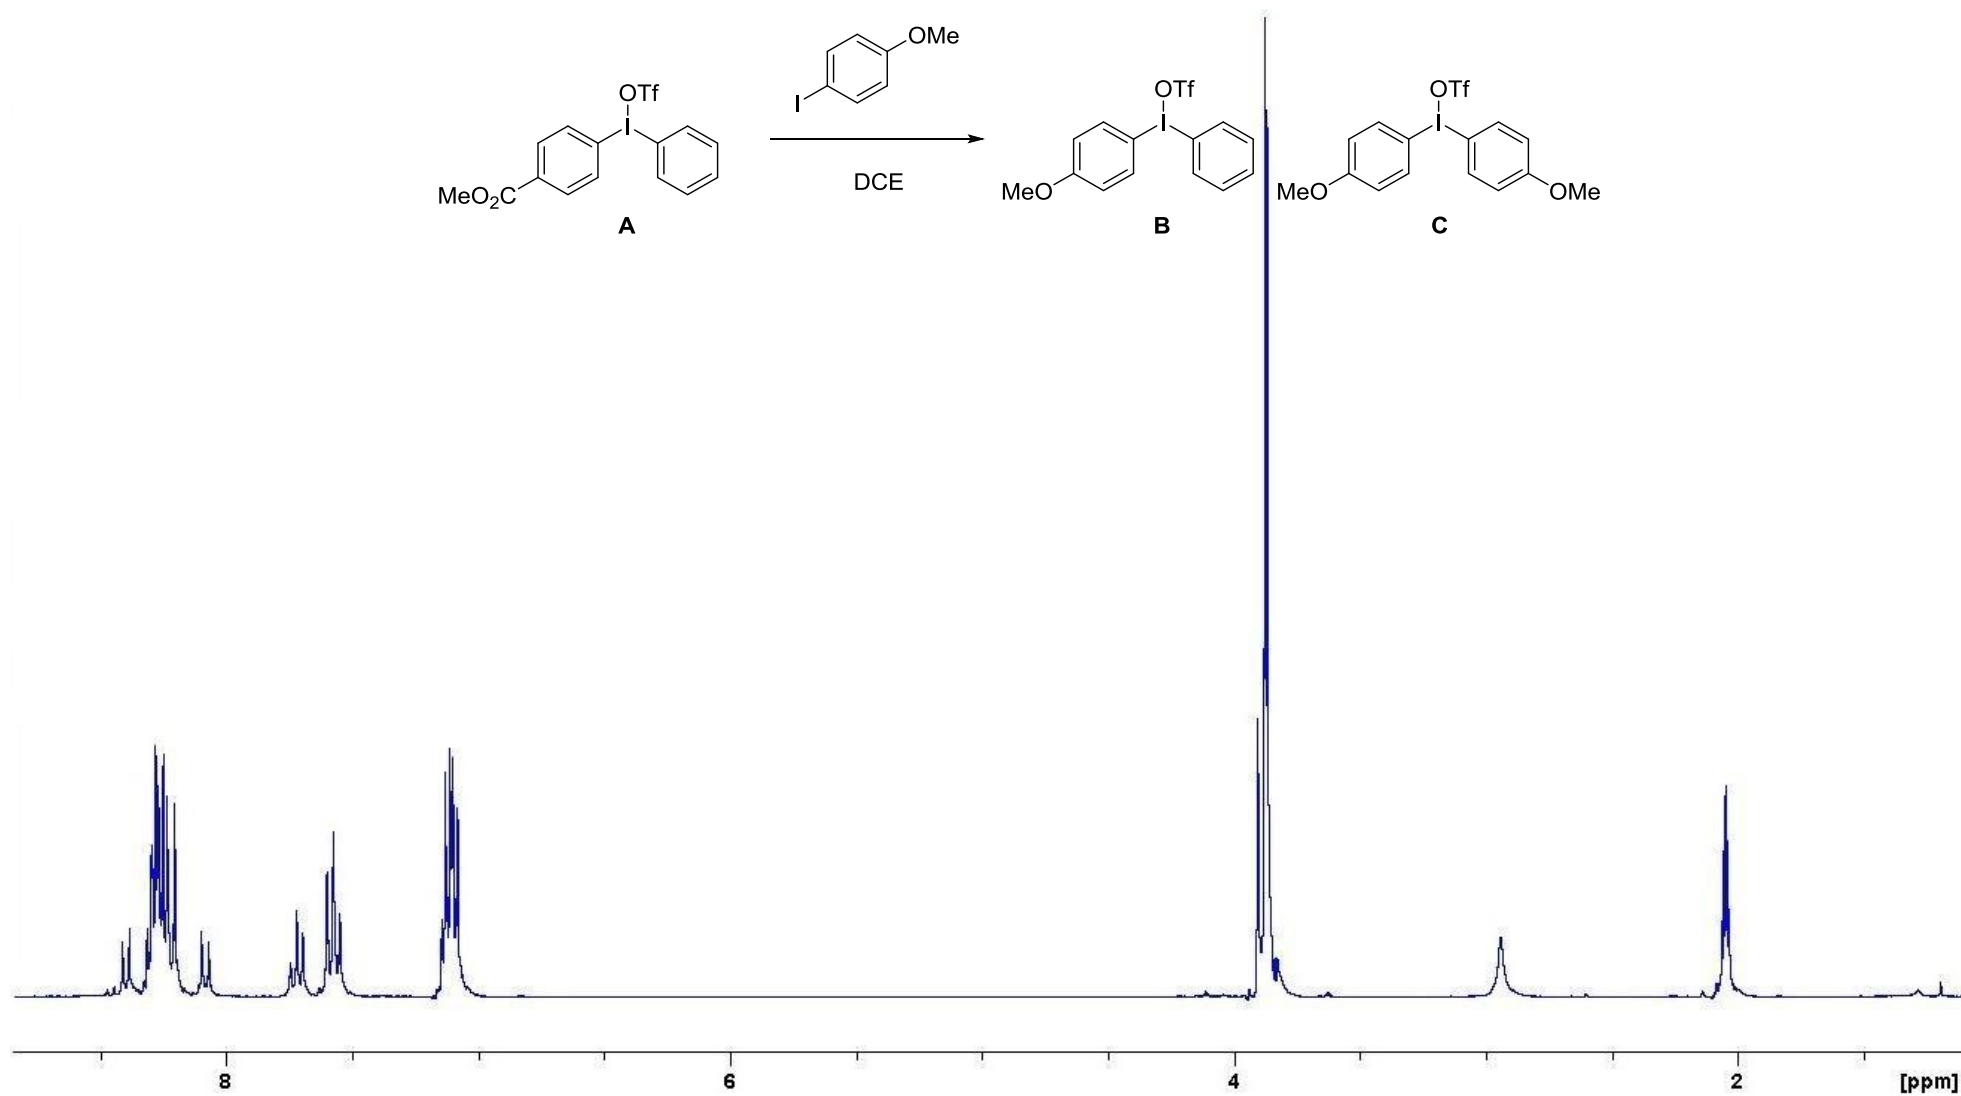

**<sup>1</sup>H NMR spectrum of the product mixture obtained in entry c of Table 2 (acetone-*d*<sub>6</sub>)**

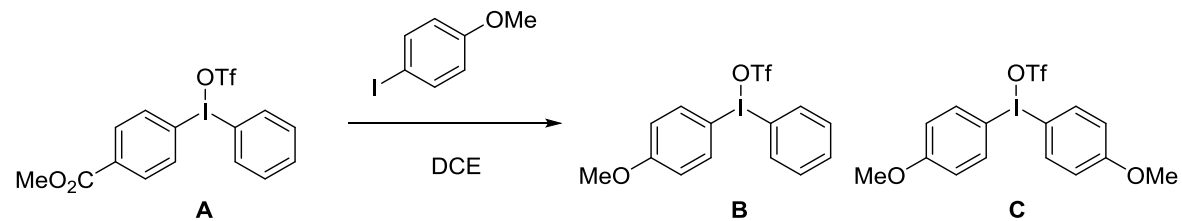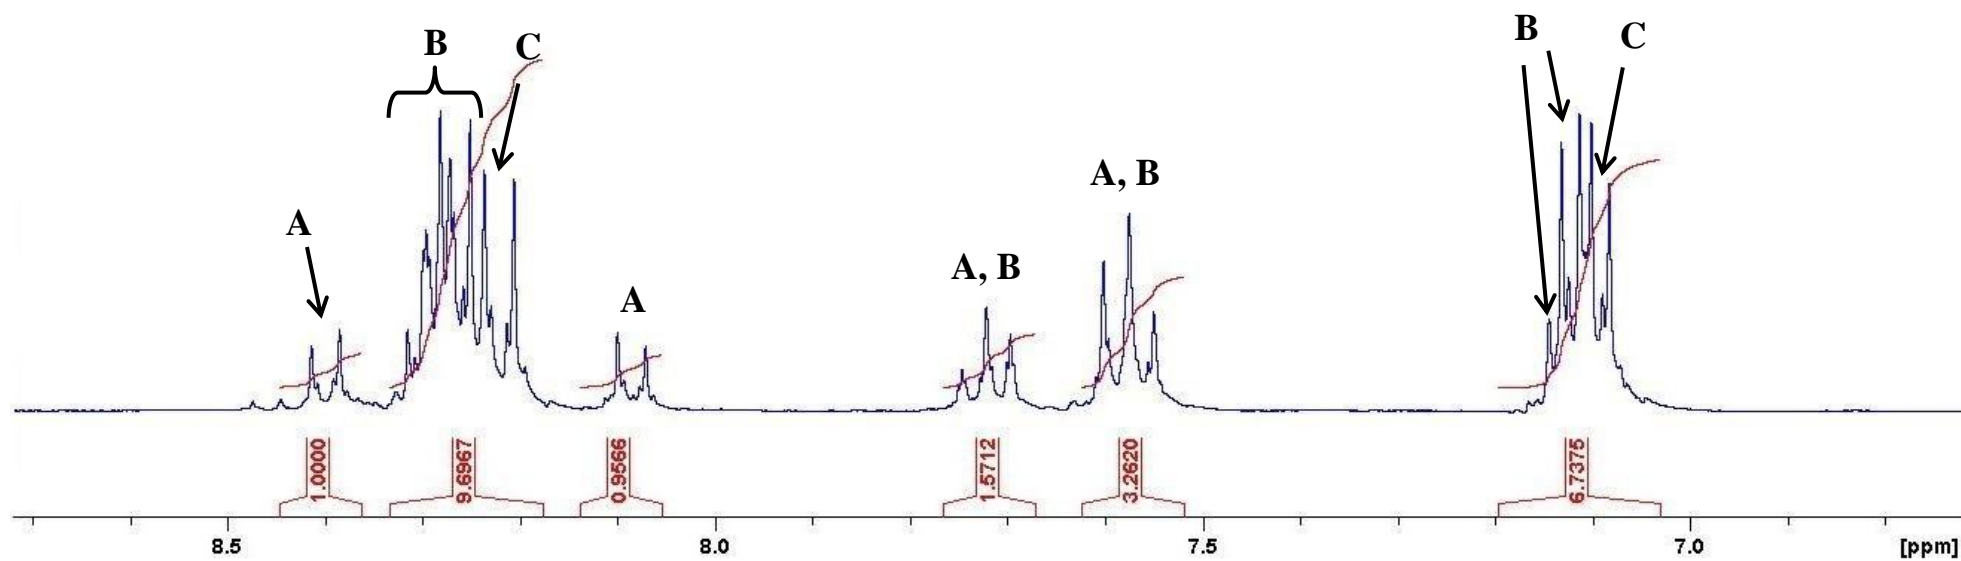

Expanded  $^1\text{H}$  NMR spectrum of the product mixture obtained in entry c of Table 2 (acetone- $d_6$ )

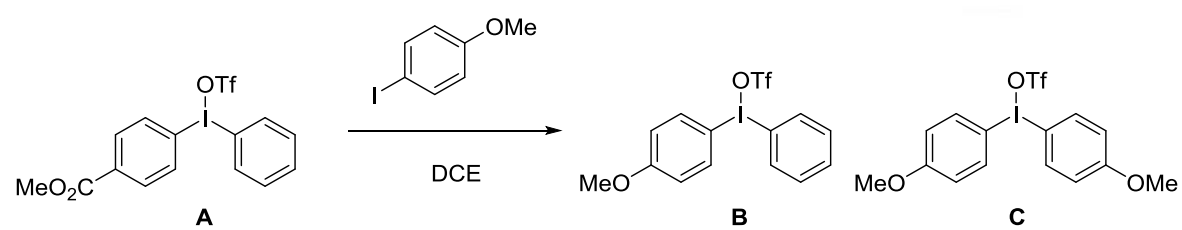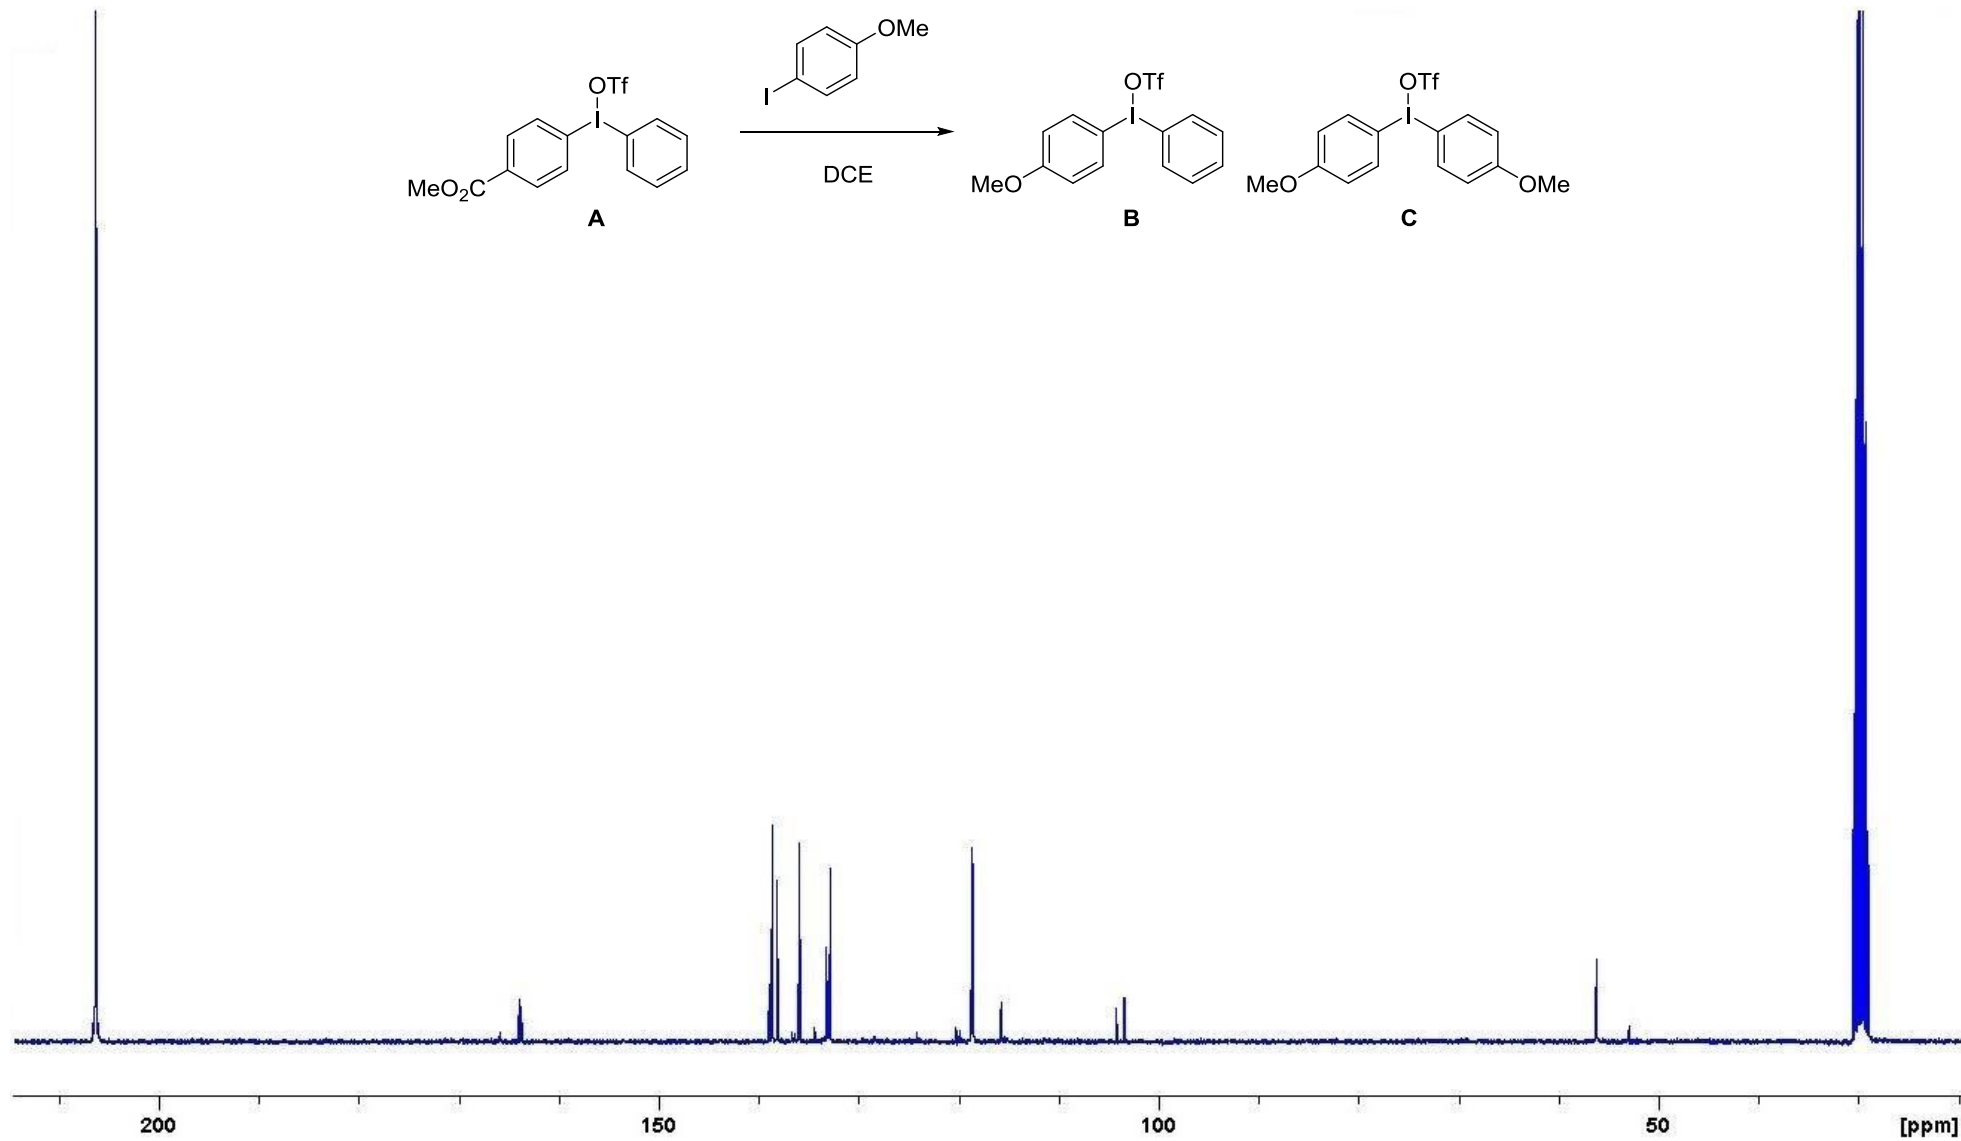

$^{13}\text{C}$  NMR spectrum of the product mixture obtained in entry c of Table 2 (acetone- $d_6$ )



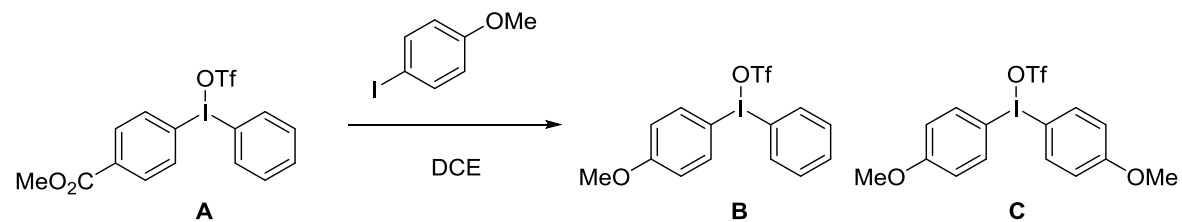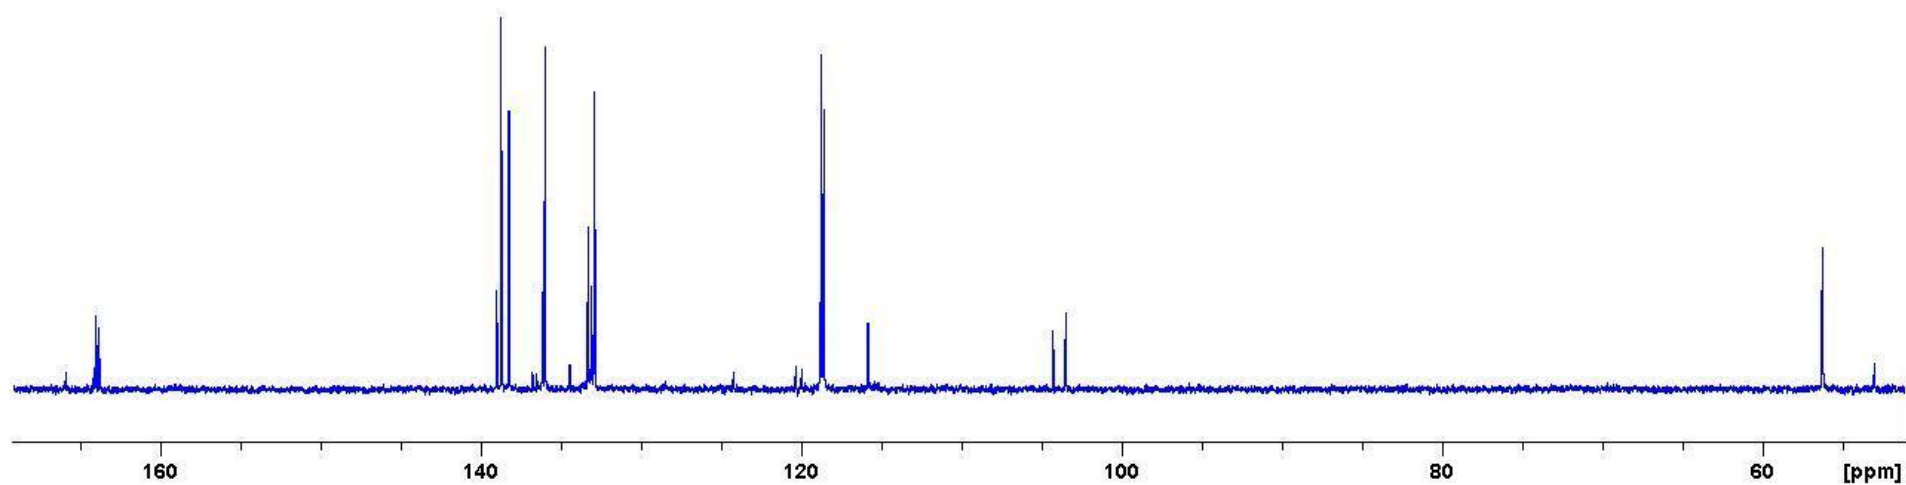

Expanded  $^{13}\text{C}$  NMR spectrum of the product mixture obtained in entry c of Table 2 (acetone- $d_6$ )

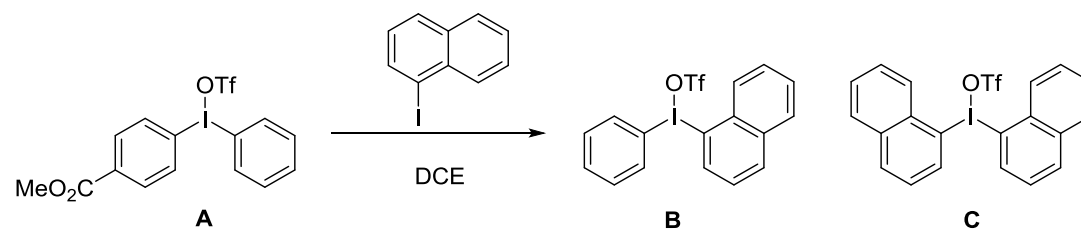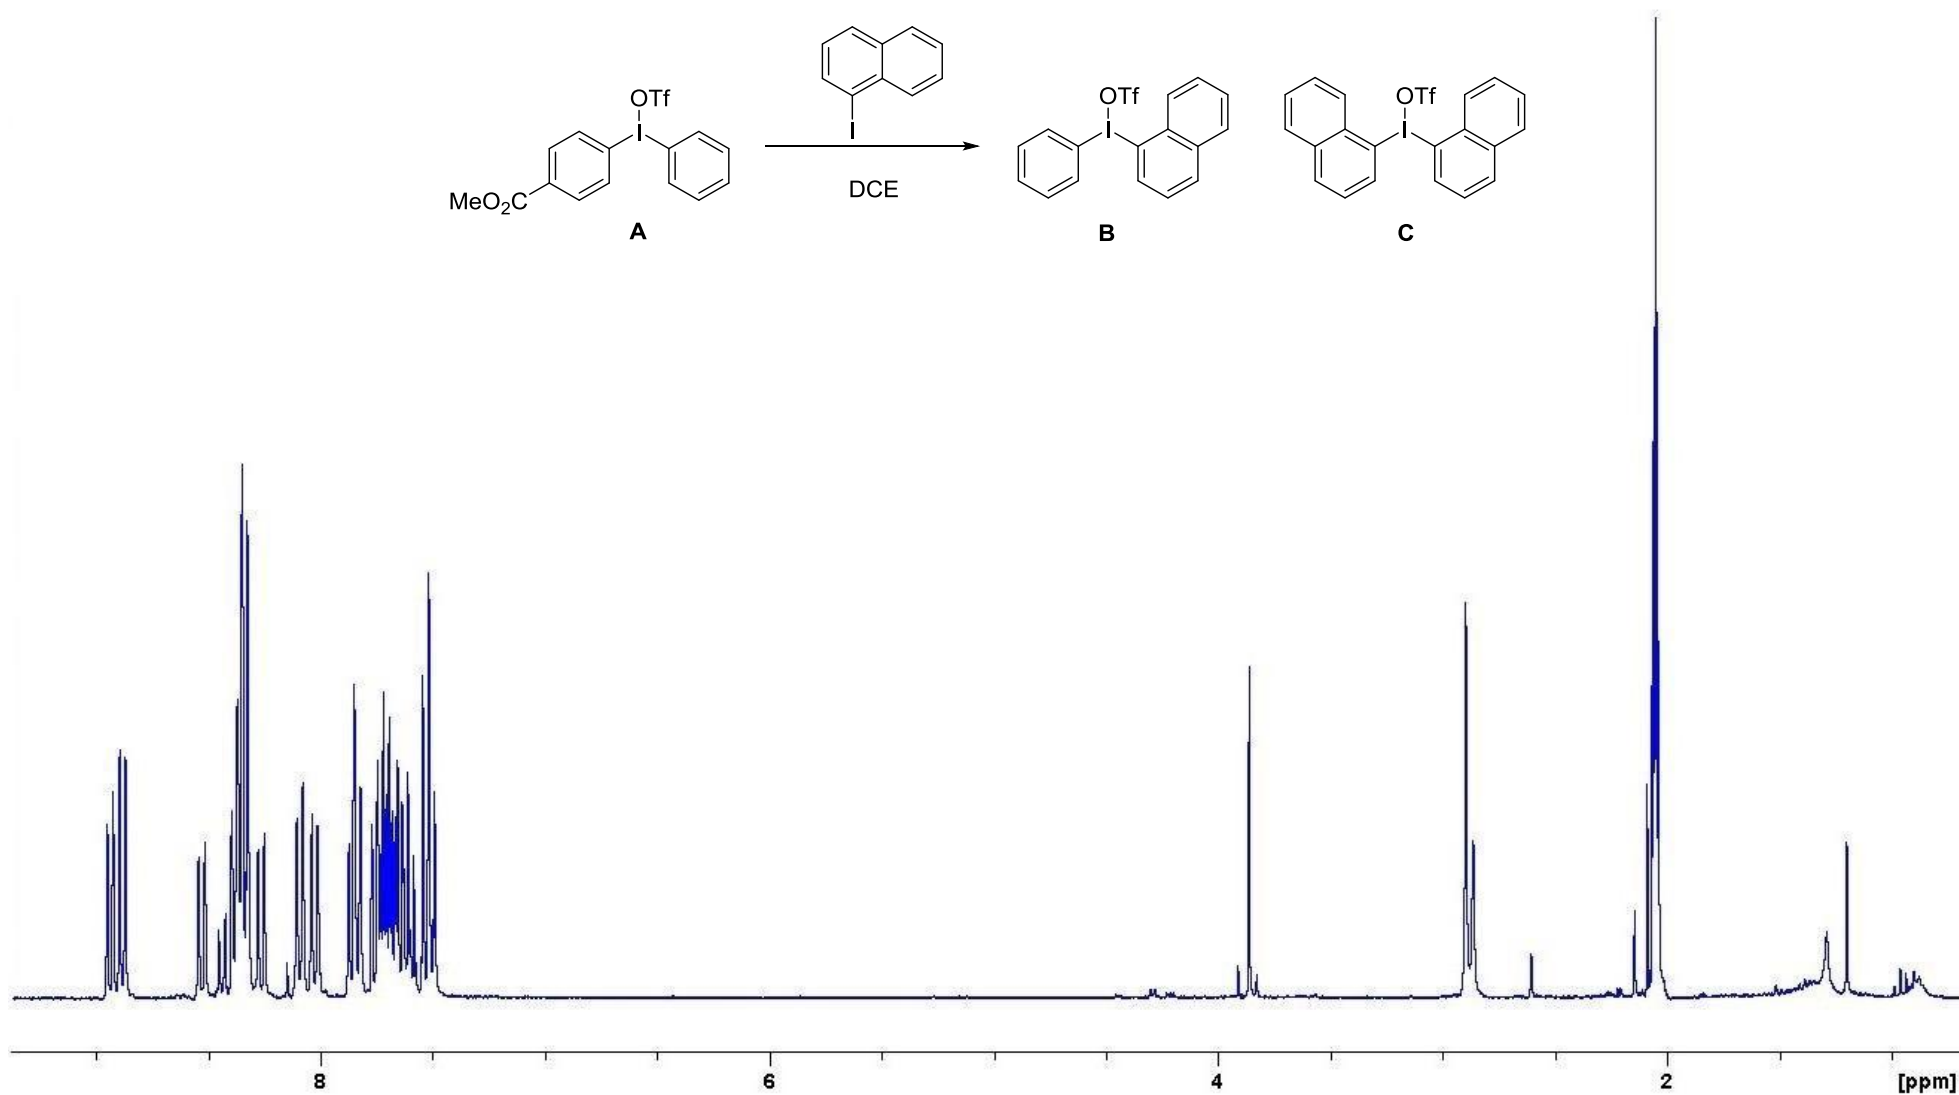

$^1\text{H}$  NMR spectrum of the product mixture obtained in entry d of Table 2 ( $\text{acetone-}d_6$ )

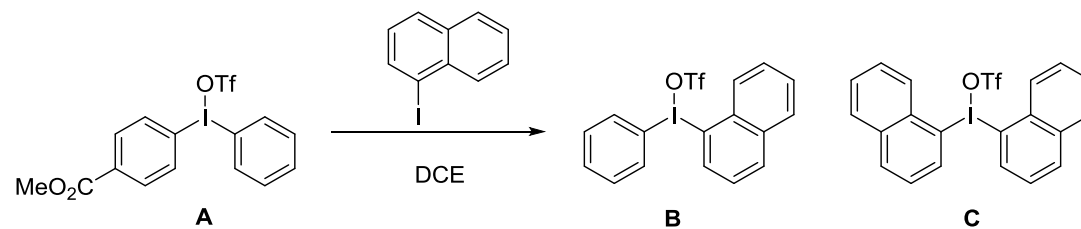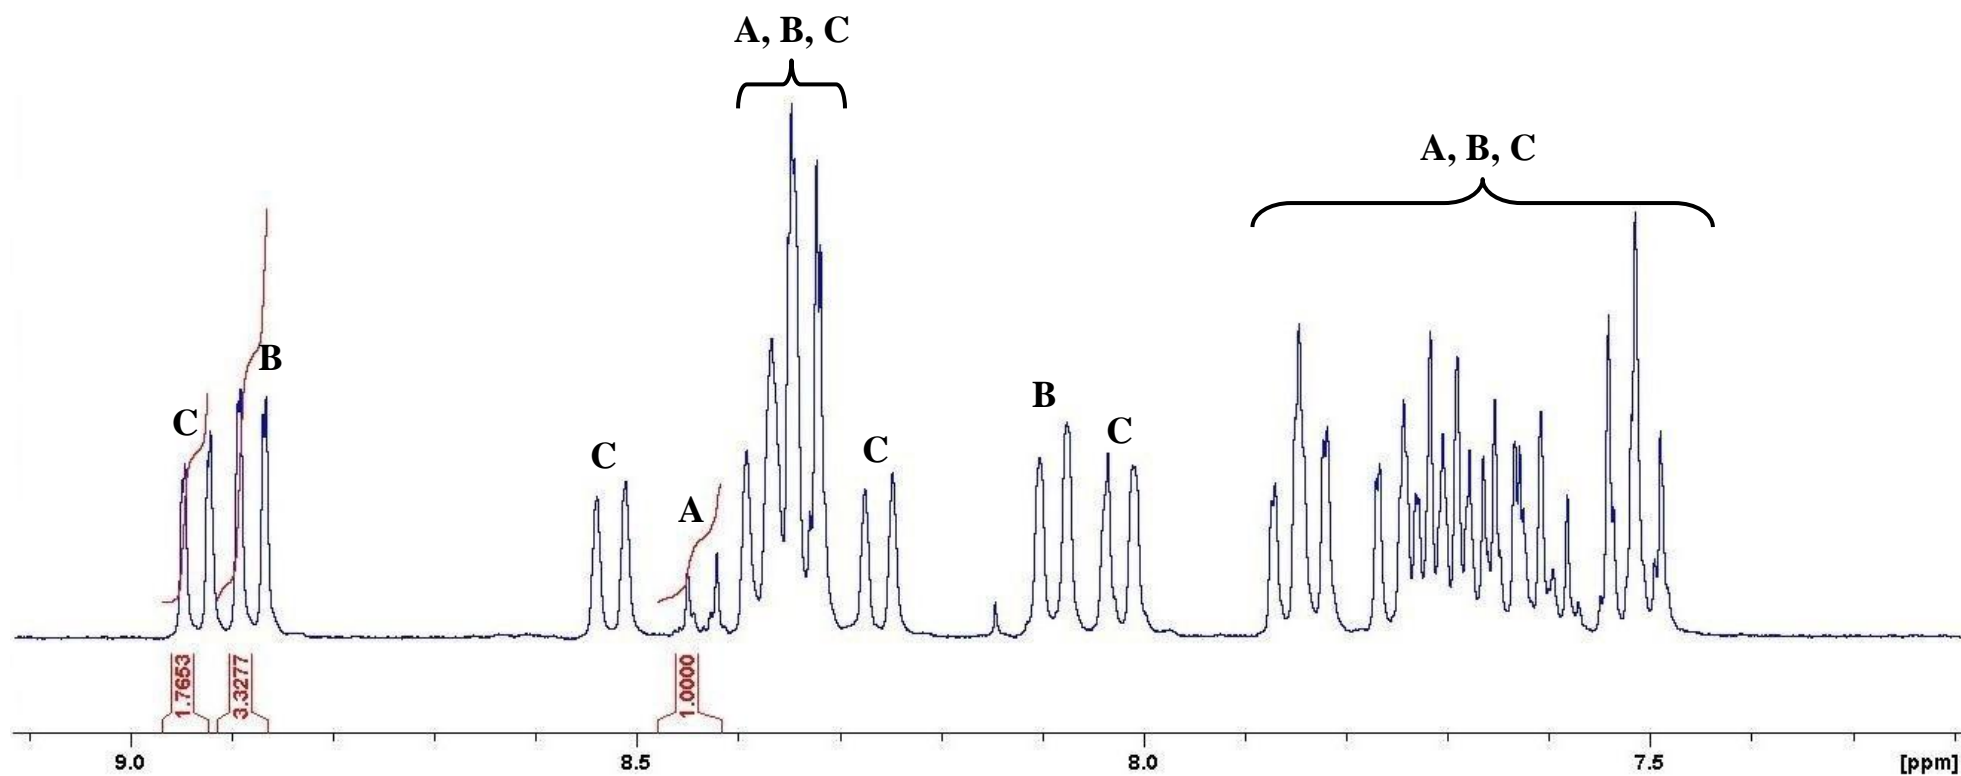

Expanded  $^1\text{H}$  NMR spectrum of the product mixture obtained in entry d of Table 2 (acetone- $d_6$ )

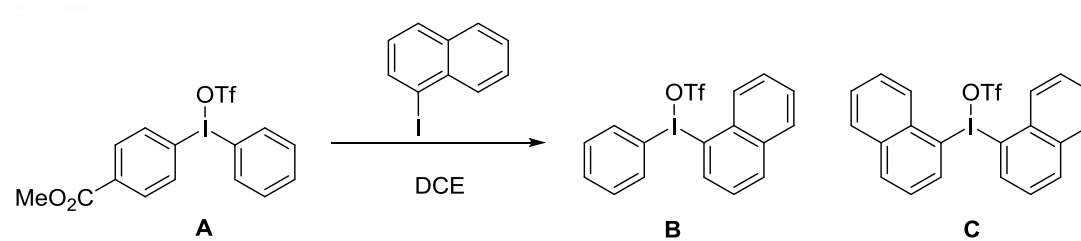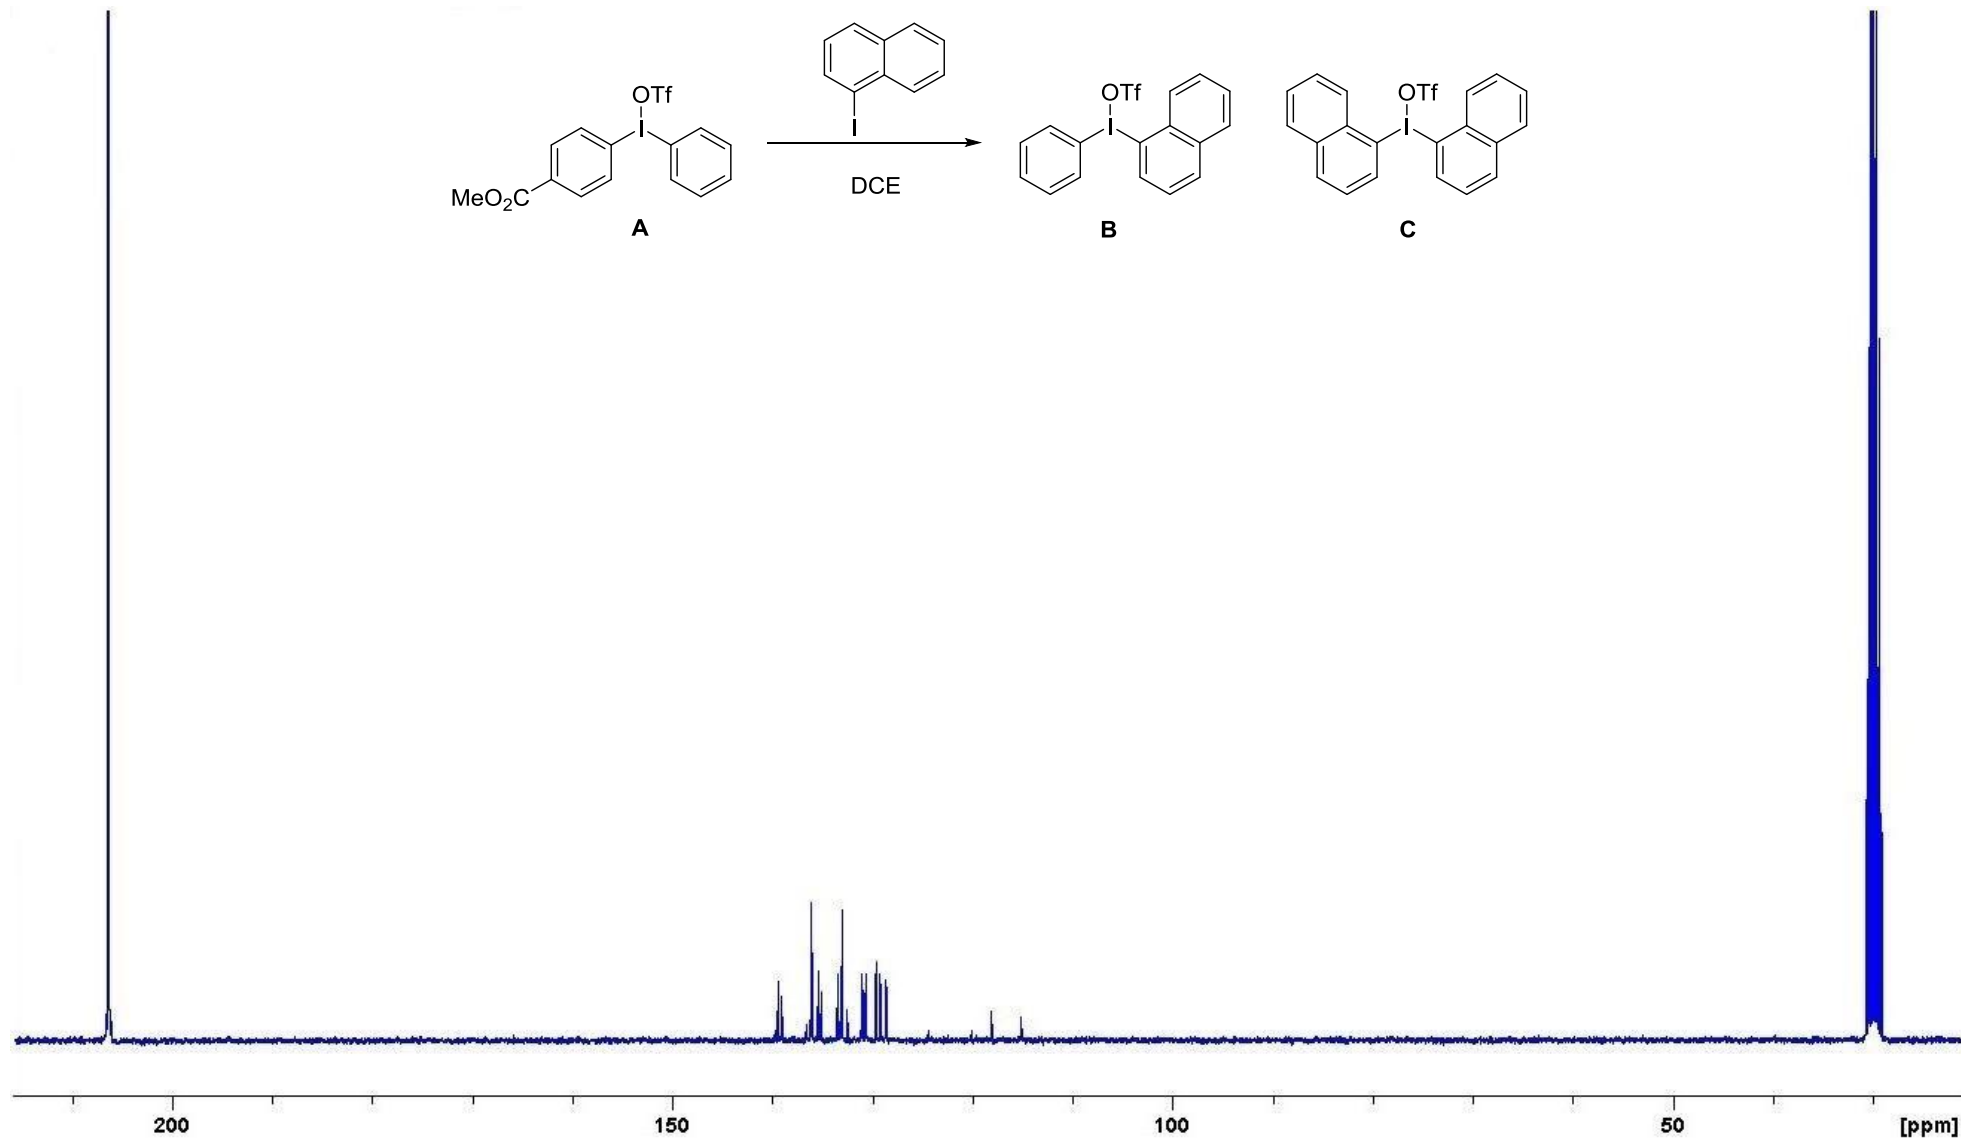

$^{13}\text{C}$  NMR spectrum of the product mixture obtained in entry d of Table 2 (acetone- $d_6$ )

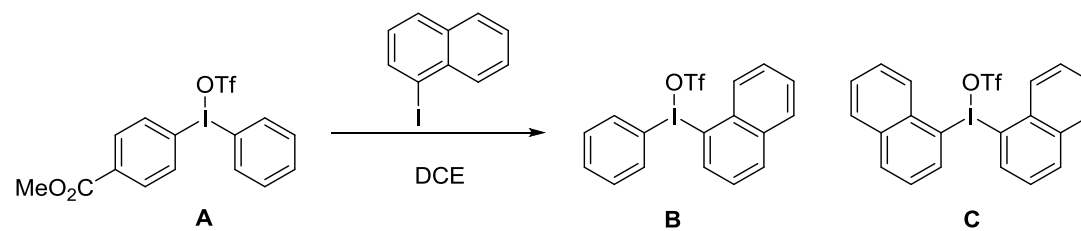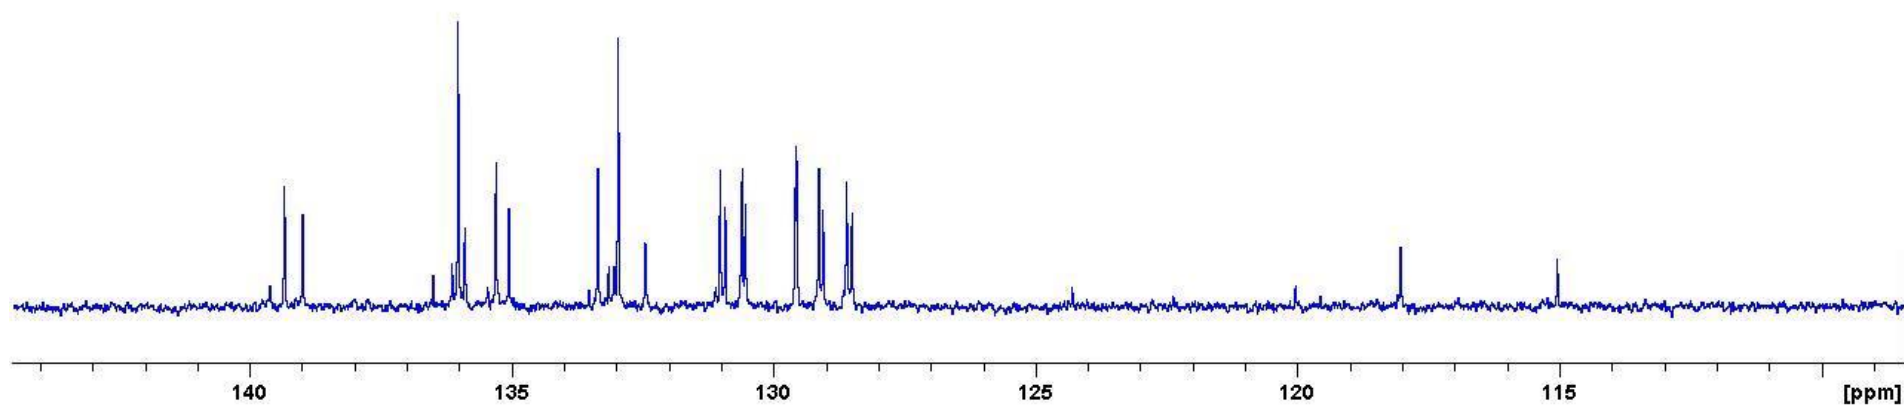

Expanded  $^{13}\text{C}$  NMR spectrum of the product mixture obtained in entry d of Table 2 (acetone- $d_6$ )

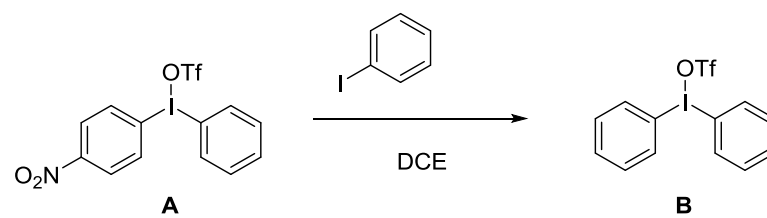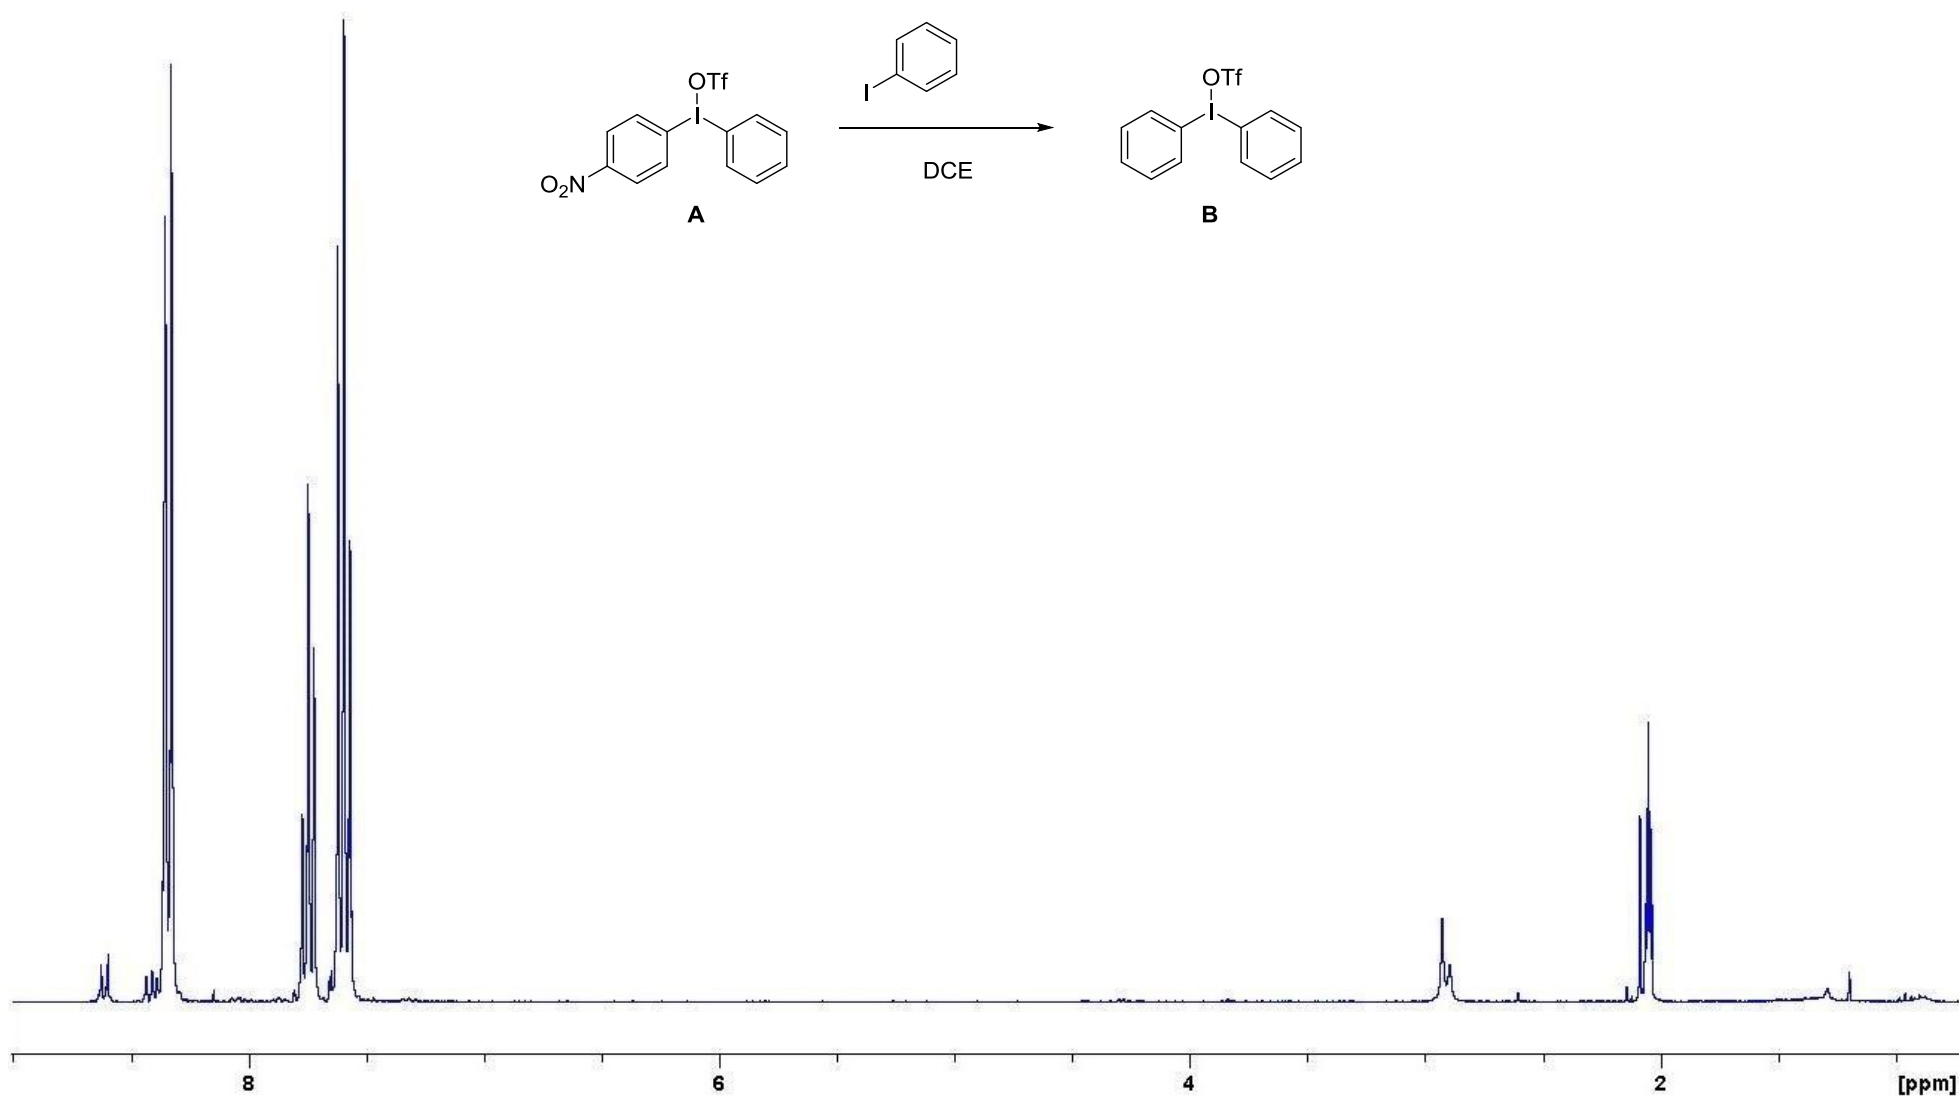

$^1\text{H}$  NMR spectrum of the product mixture obtained in entry a of Table 3 (acetone- $d_6$ )

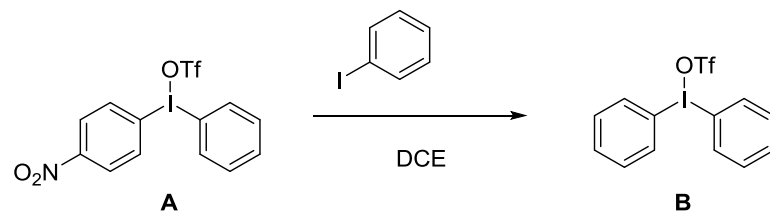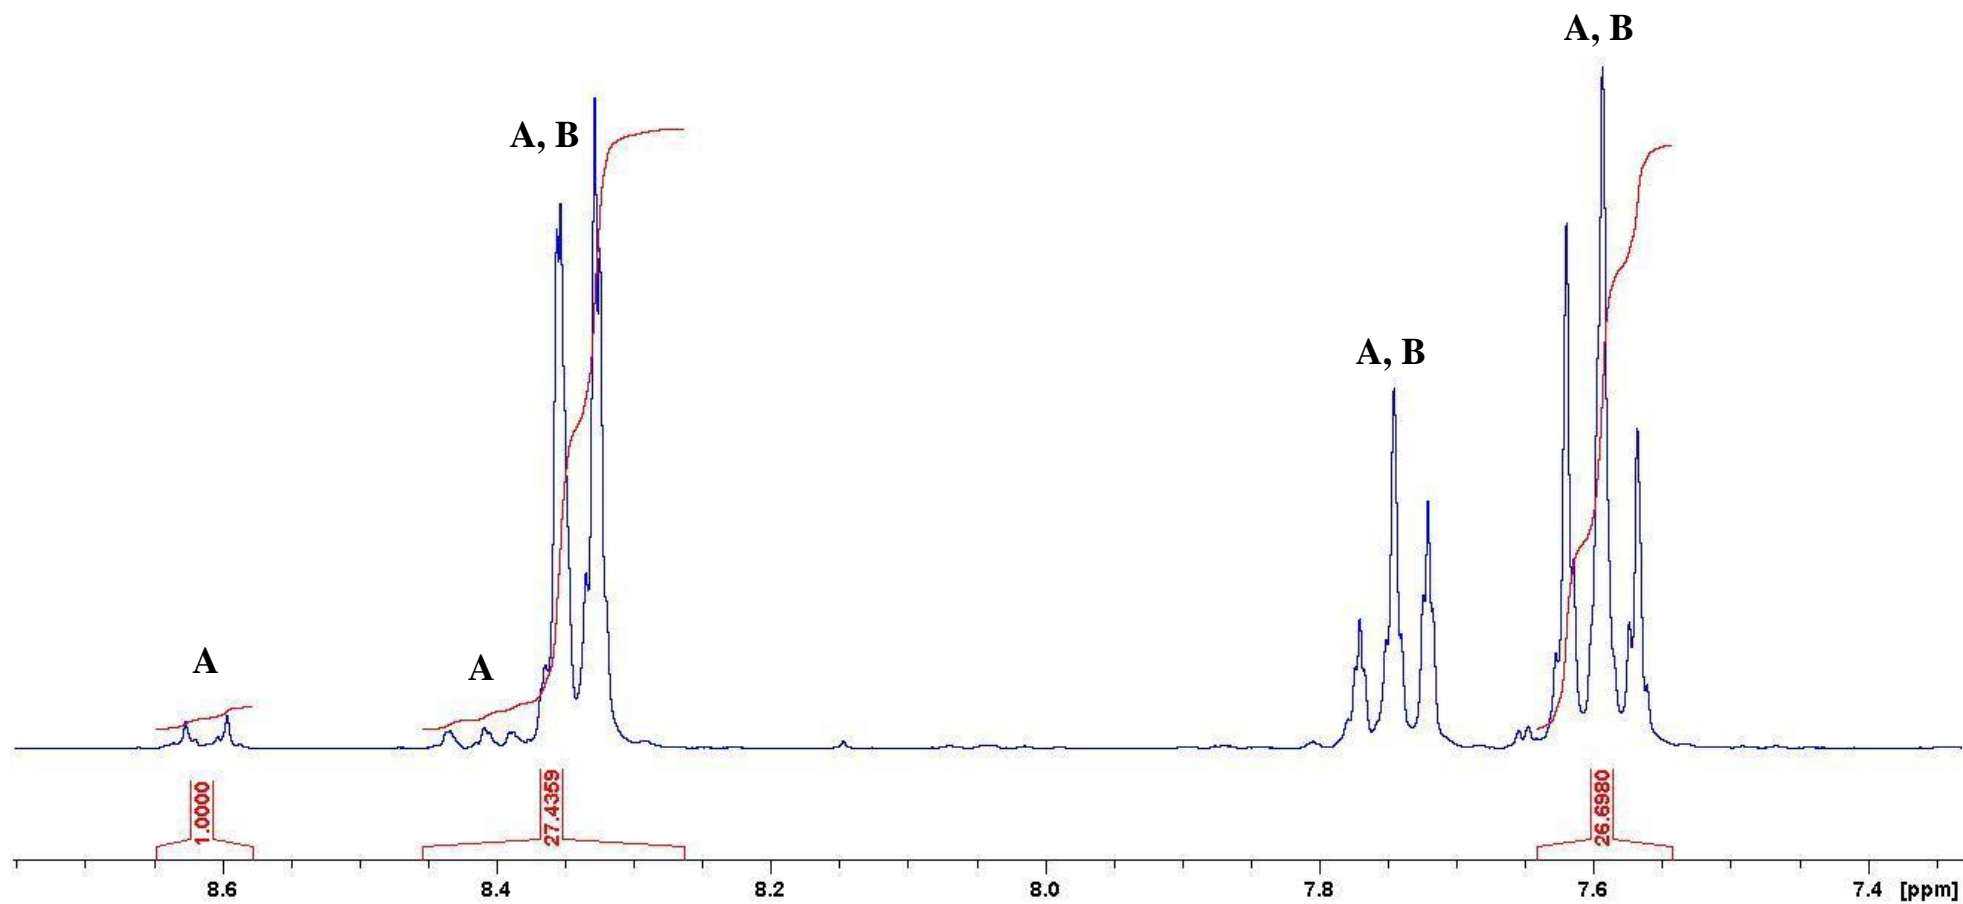

Expanded  $^1\text{H}$  NMR spectrum of the product mixture obtained in entry a of Table 3 (acetone- $d_6$ )

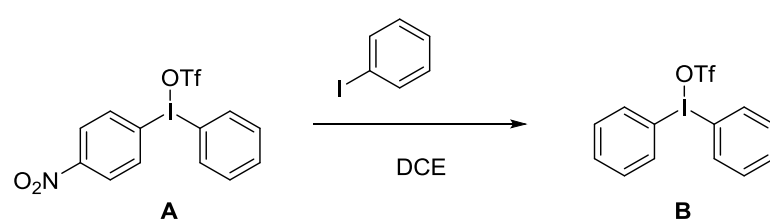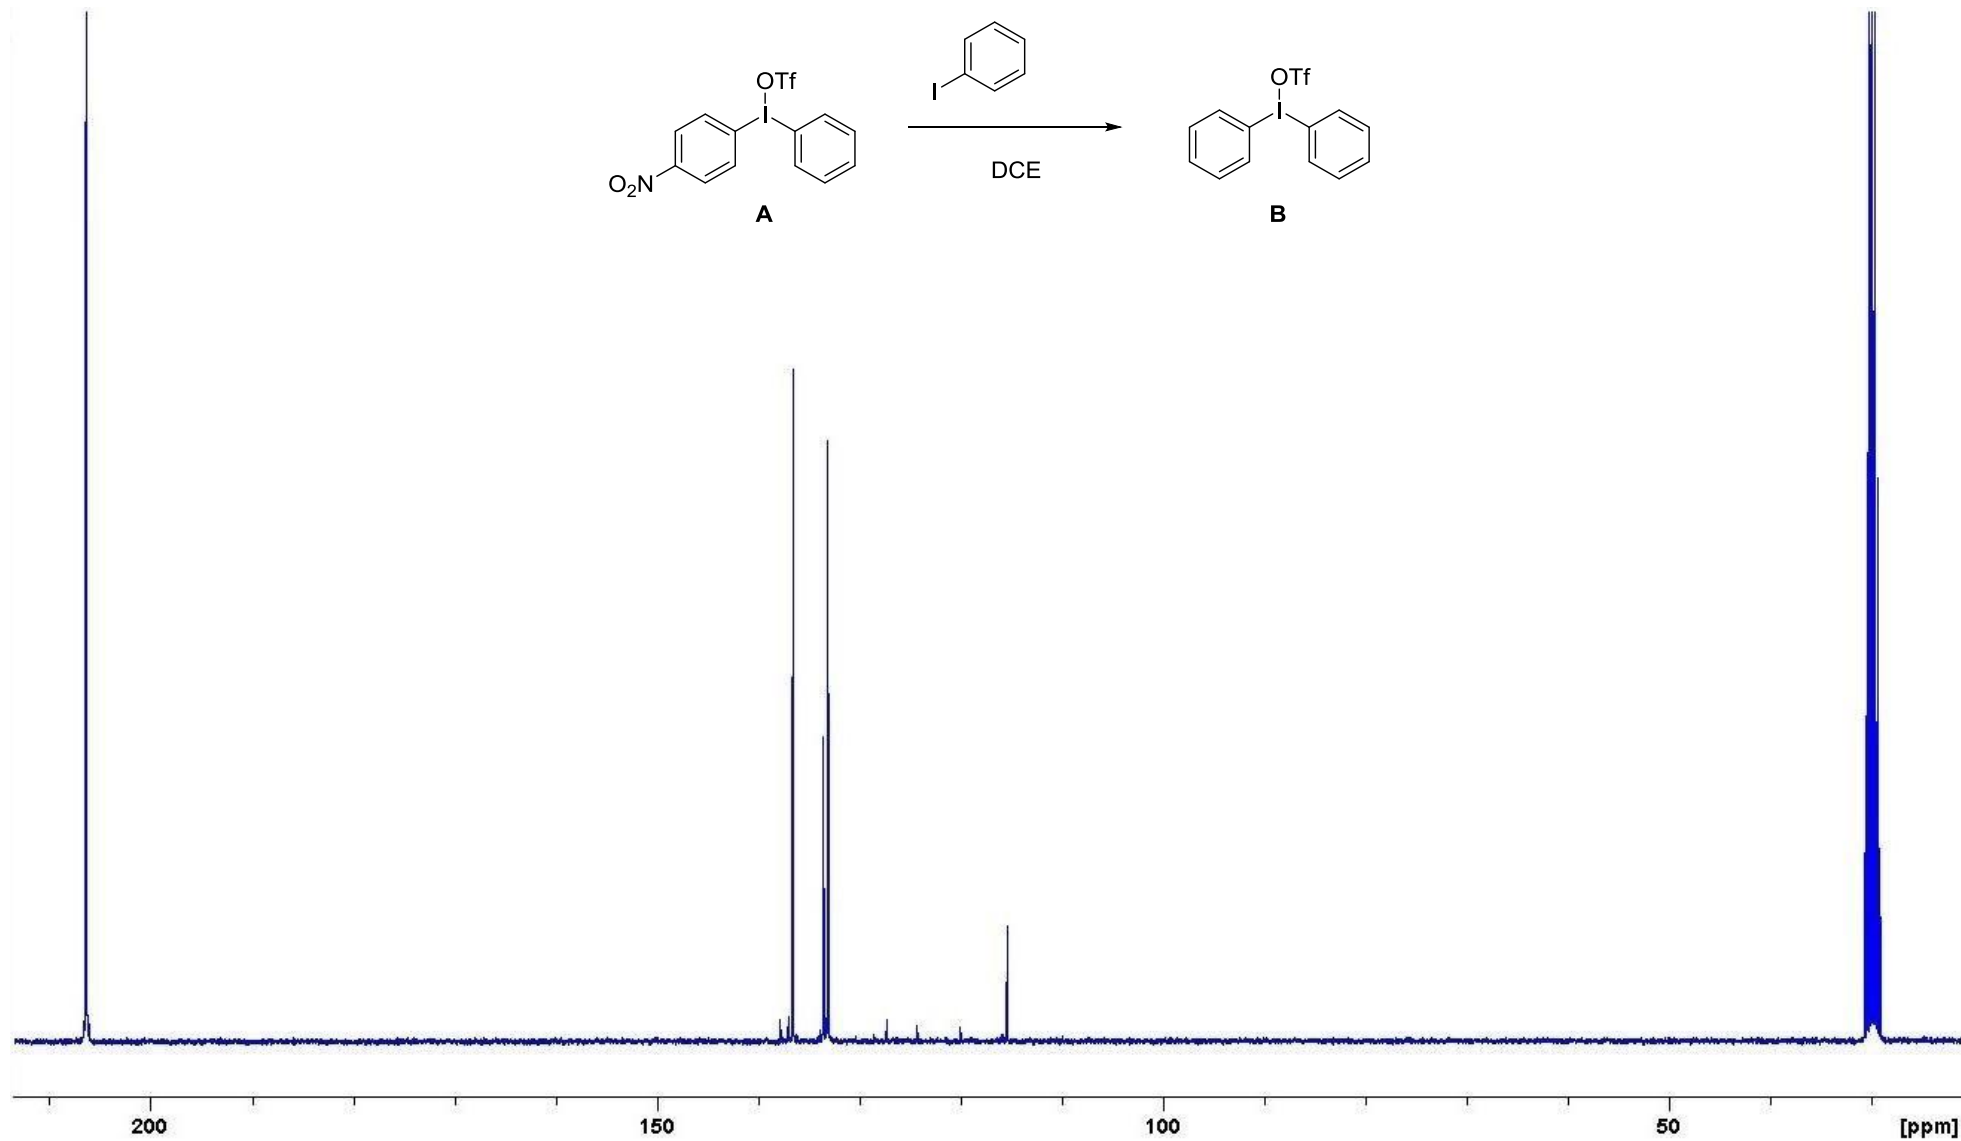

$^{13}\text{C}$  NMR spectrum of the product mixture obtained in entry a of Table 3 (acetone- $d_6$ )



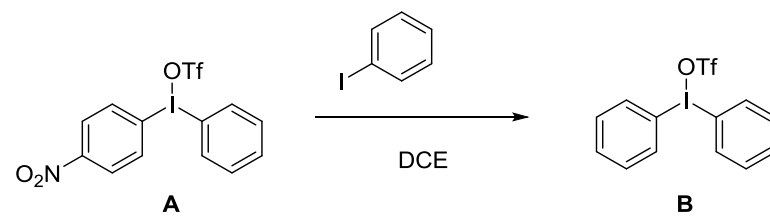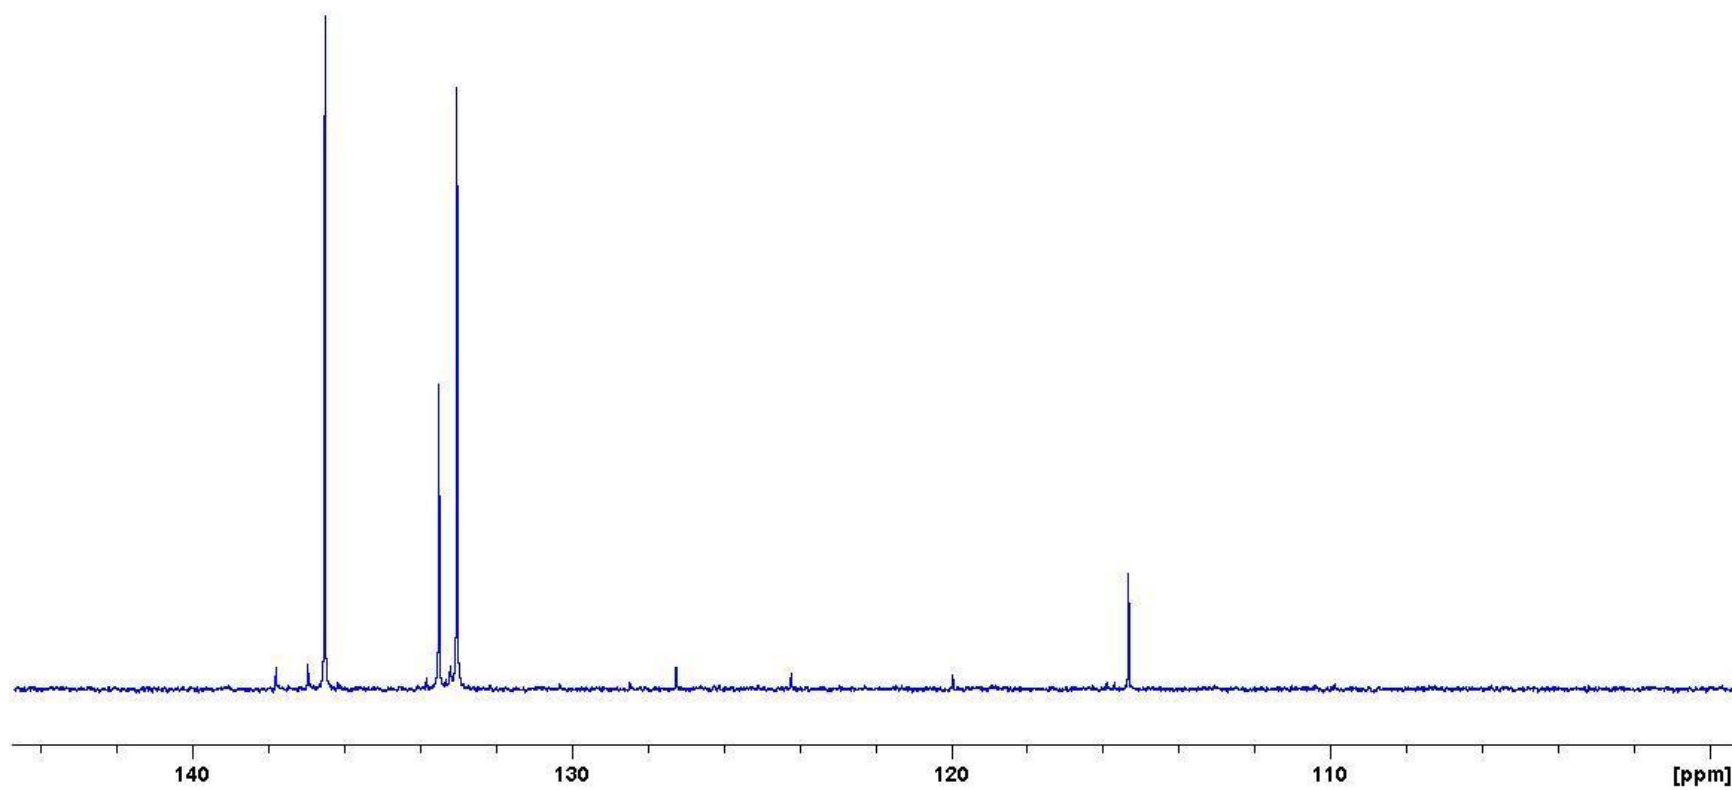

Expanded  $^{13}\text{C}$  NMR spectrum of the product mixture obtained in entry a of Table 3 (acetone- $d_6$ )

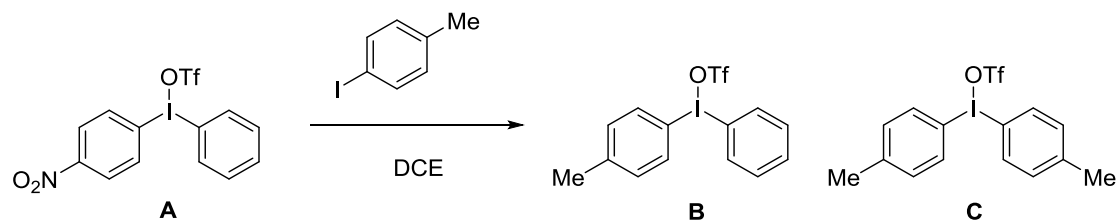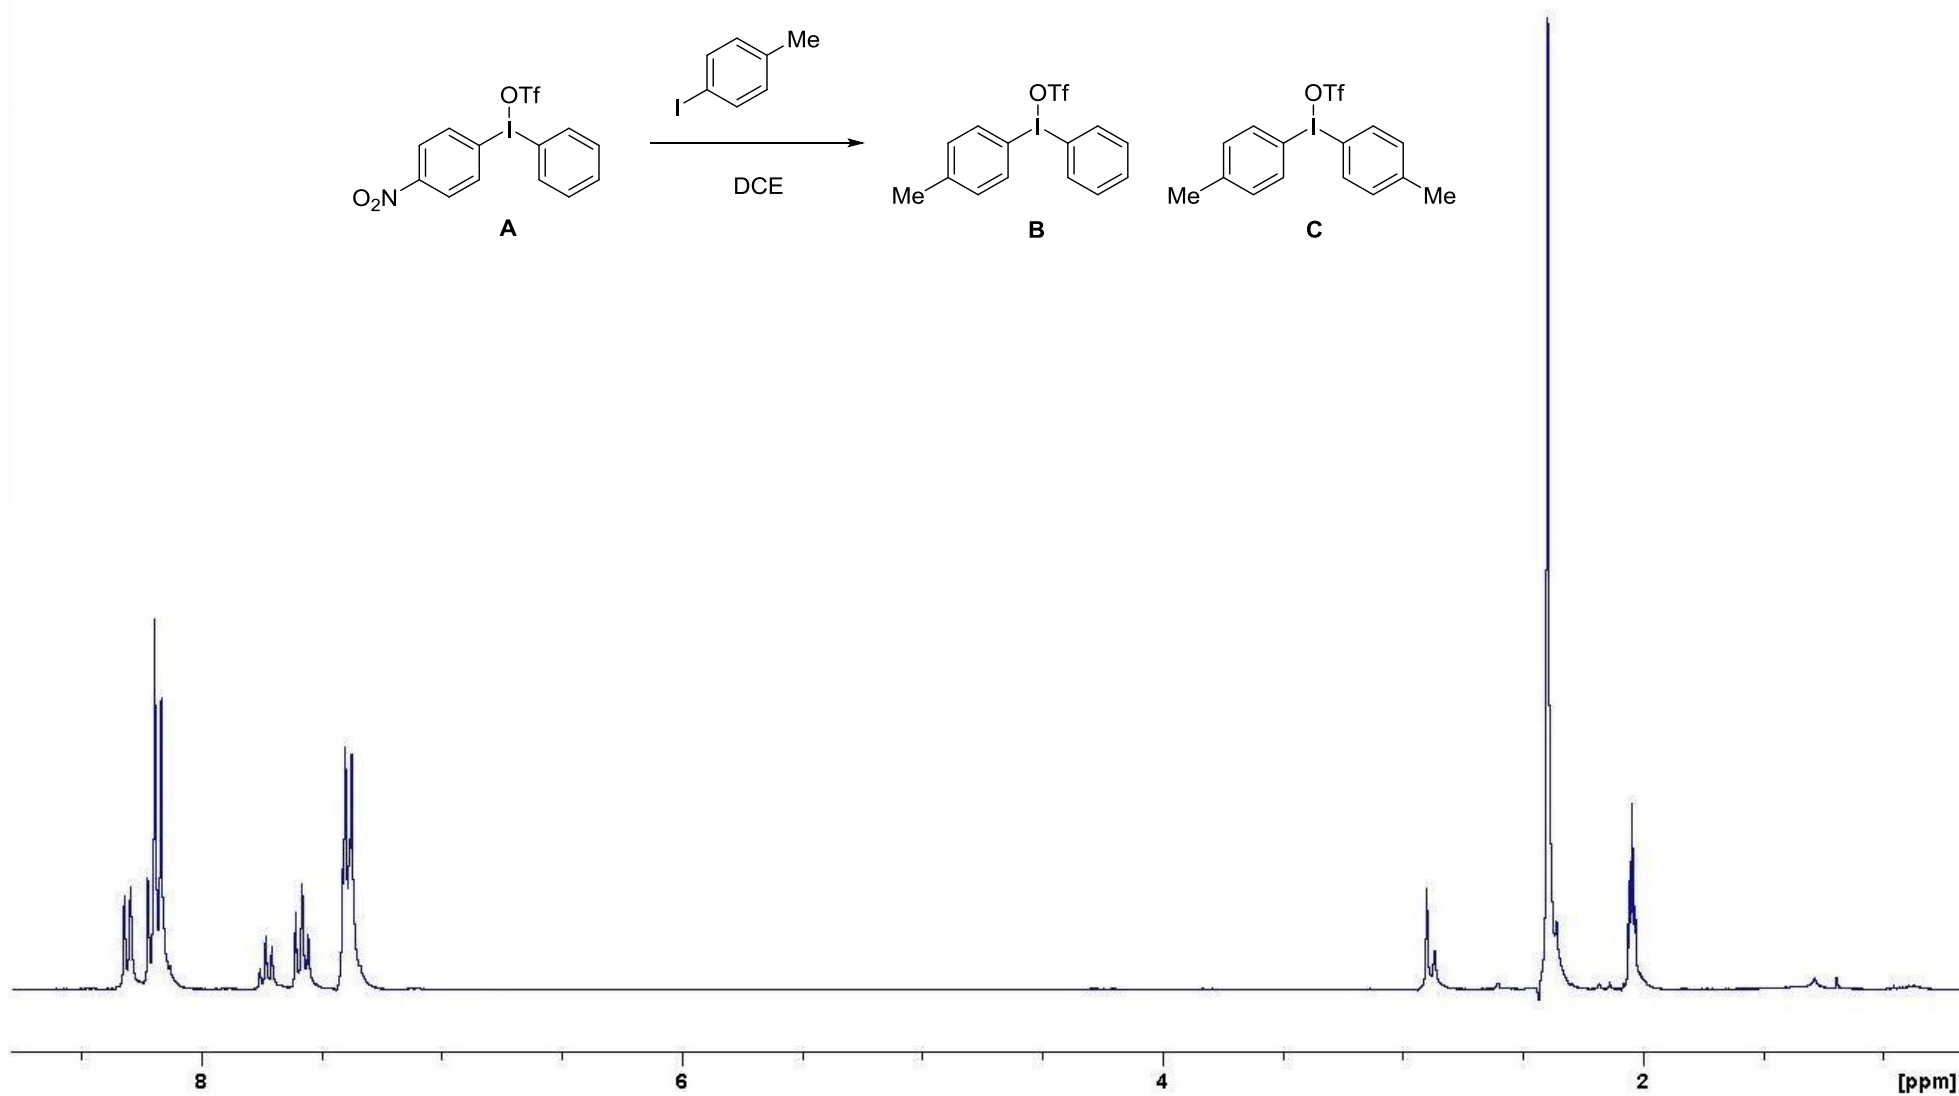

$^1\text{H}$  NMR spectrum of the product mixture obtained in entry b of Table 3 (acetone- $d_6$ )

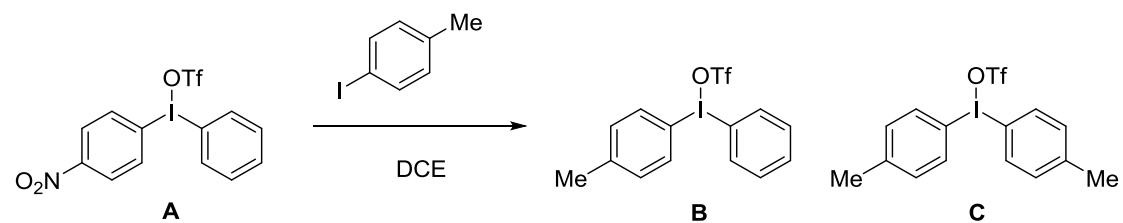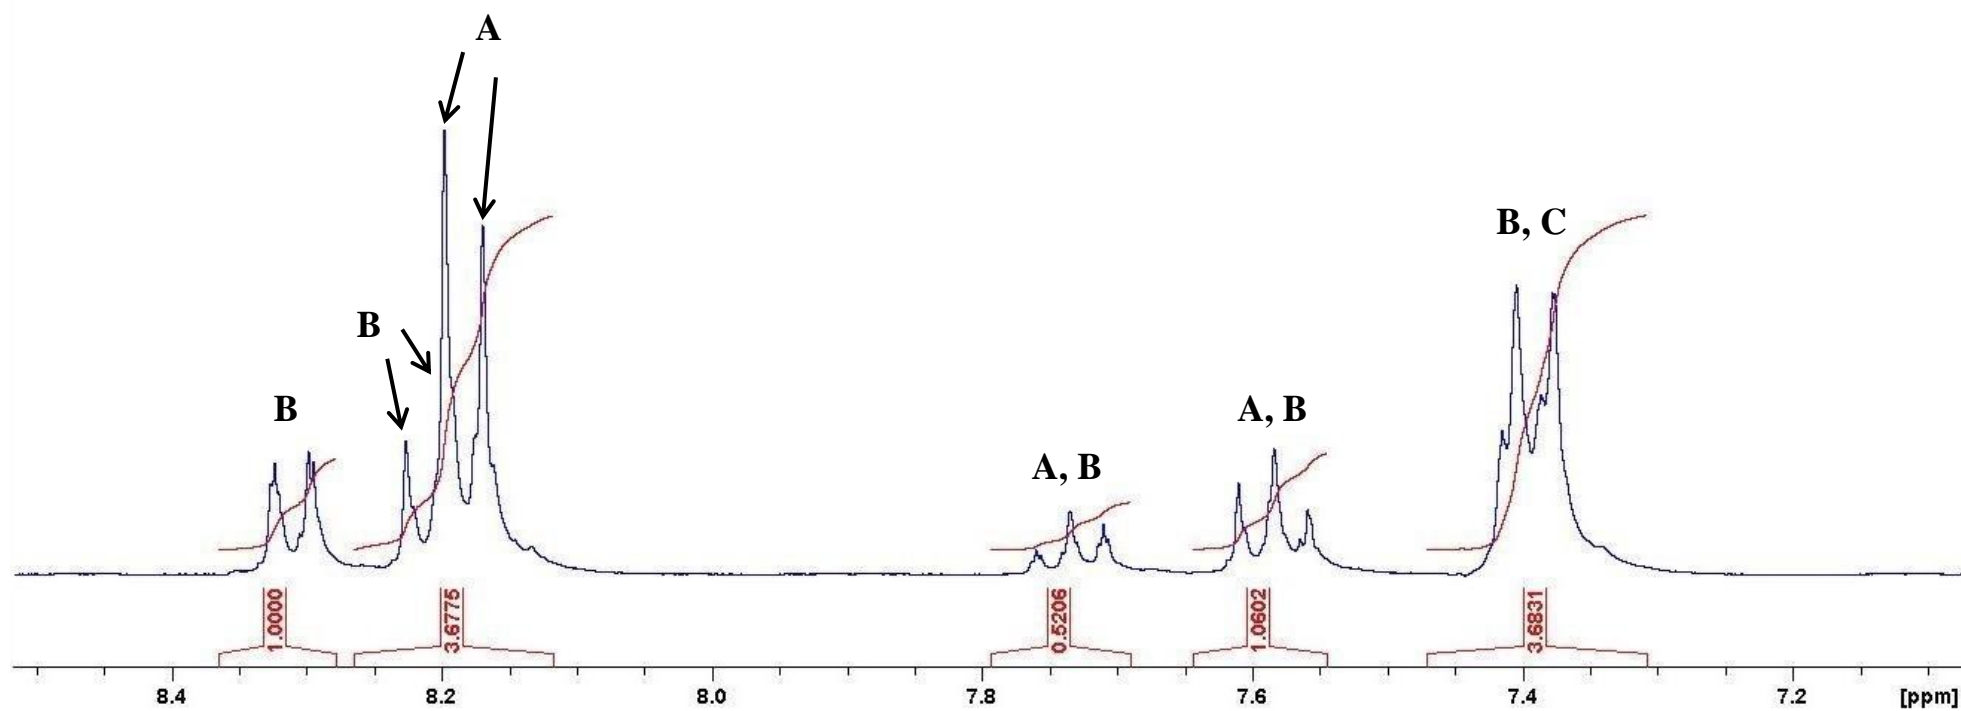

Expanded  $^1\text{H}$  NMR spectrum of the product mixture obtained in entry b of Table 3 ( $\text{acetone-}d_6$ )

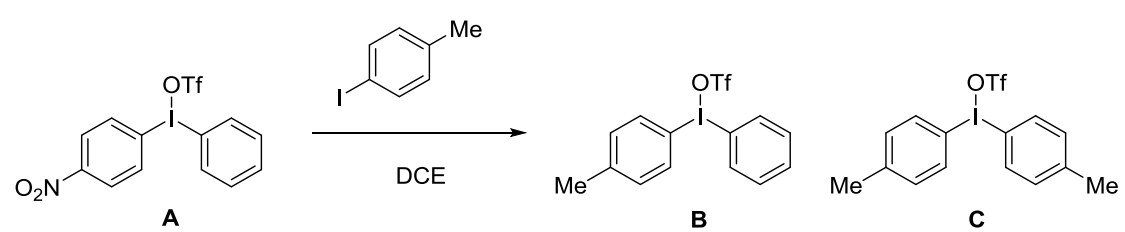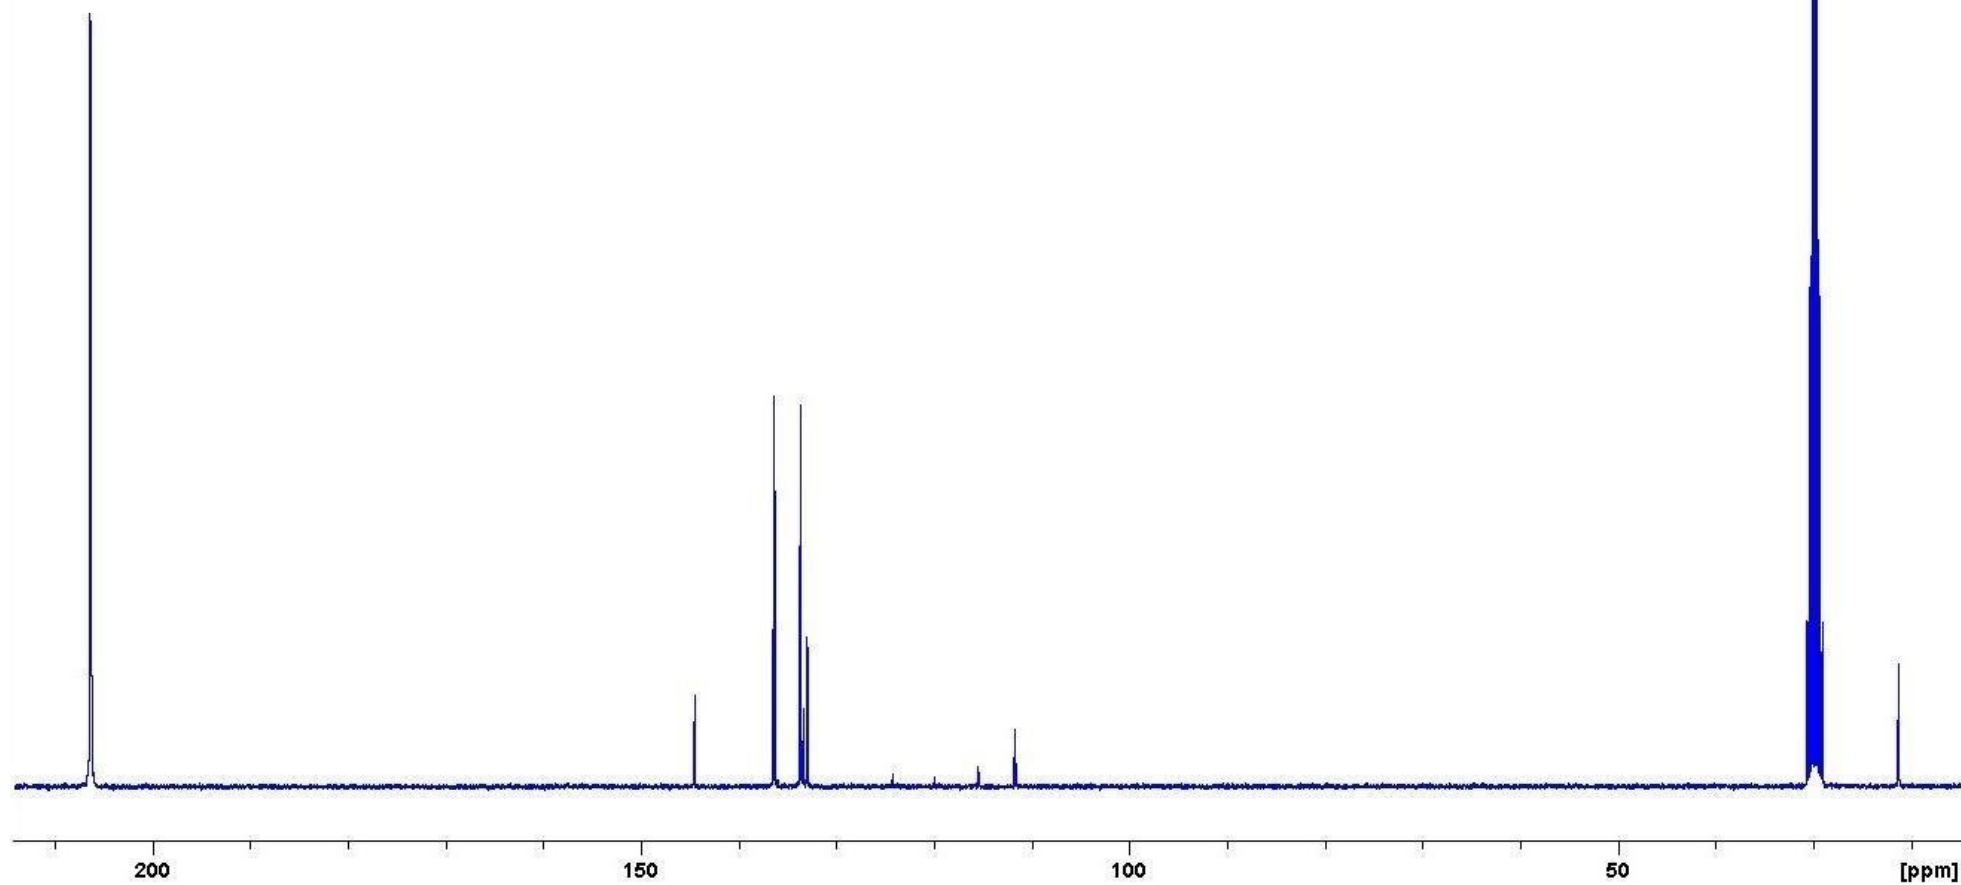

$^{13}\text{C}$  NMR spectrum of the product mixture obtained in entry b of Table 3 (acetone- $d_6$ )

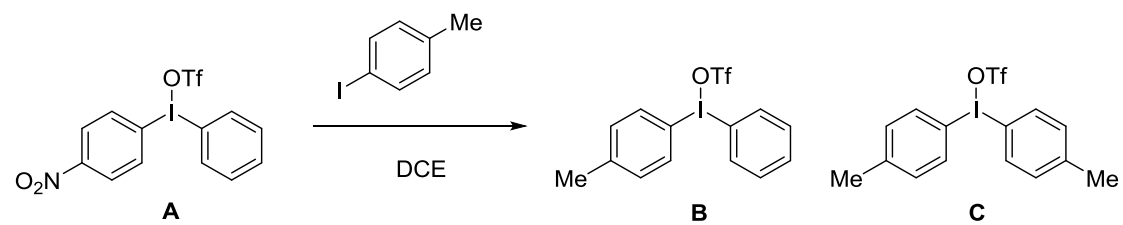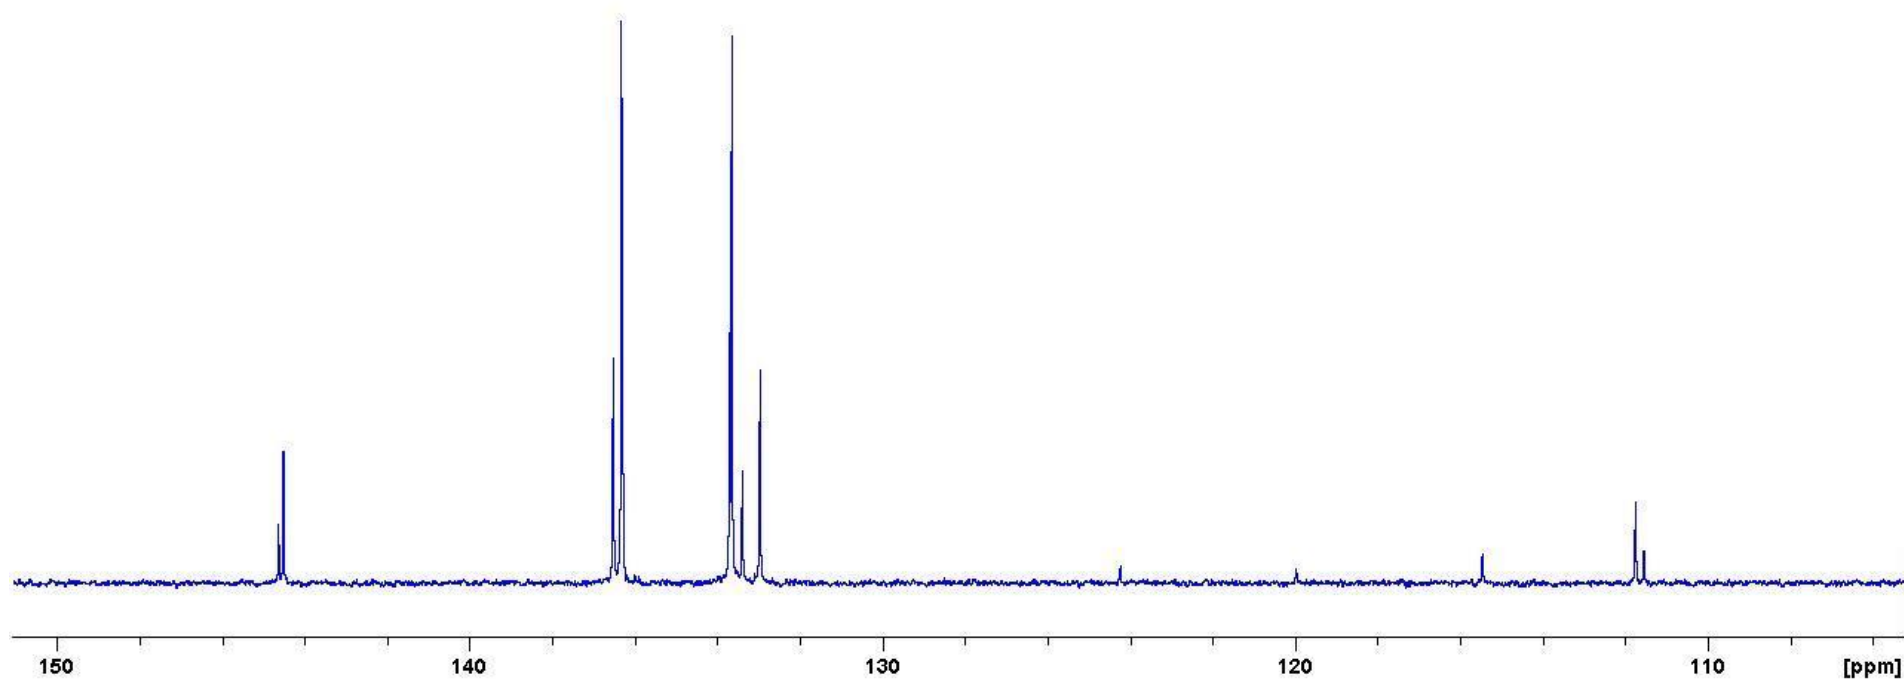

Expanded  $^{13}\text{C}$  NMR spectrum of the product mixture obtained in entry b of Table 3 (acetone- $d_6$ )

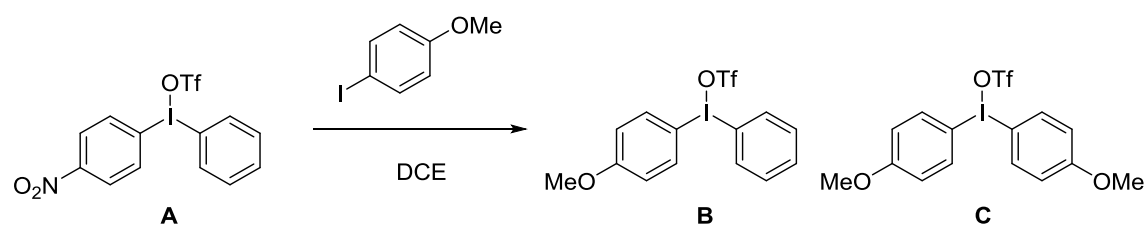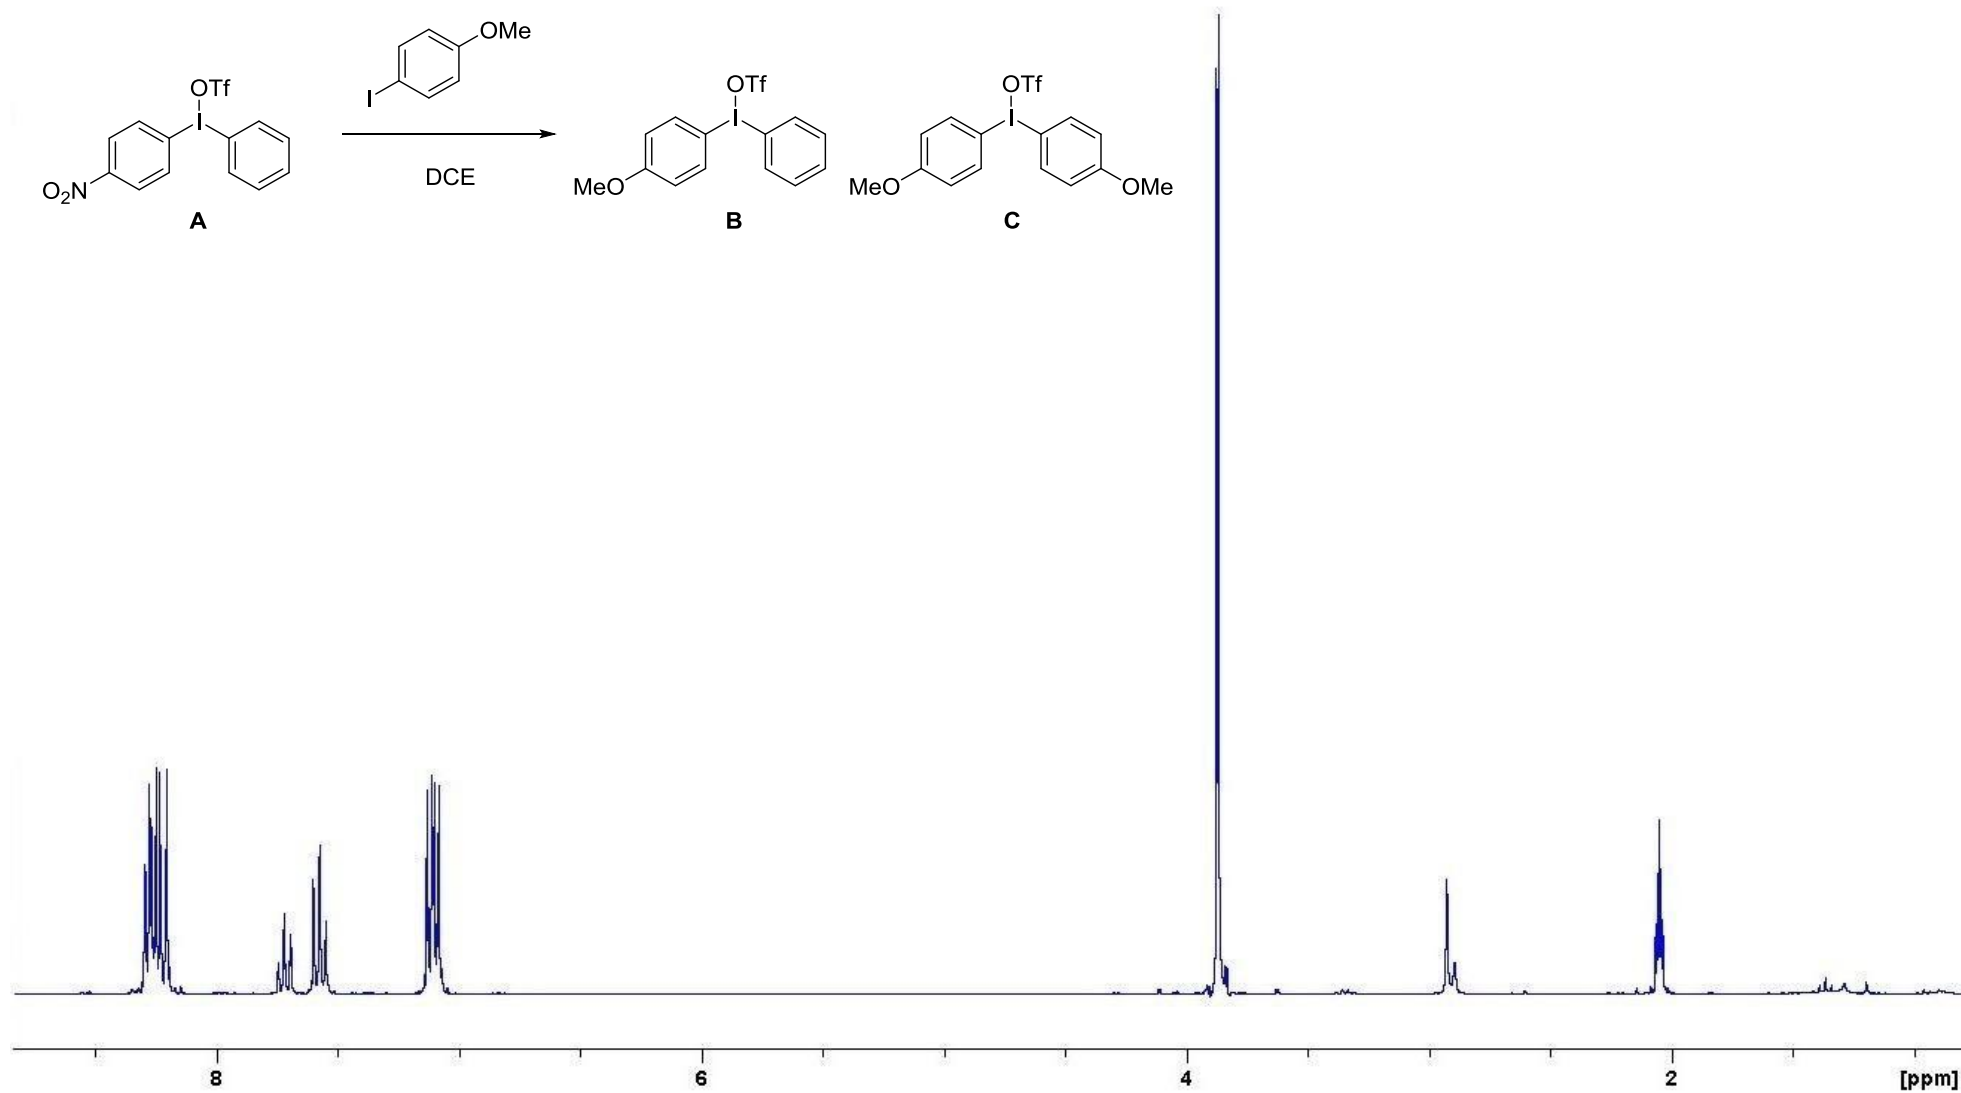

$^1\text{H}$  NMR spectrum of the product mixture obtained in entry c of Table 3 ( $\text{acetone-}d_6$ )

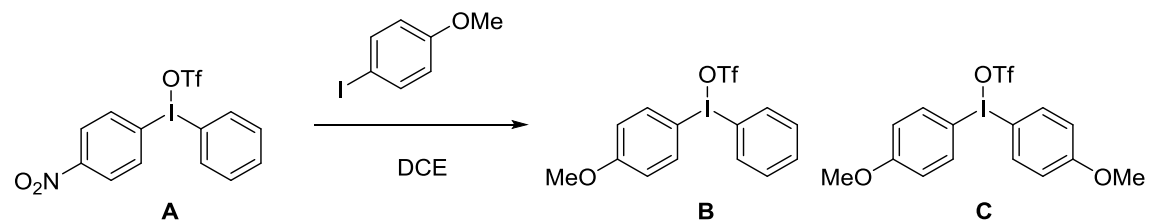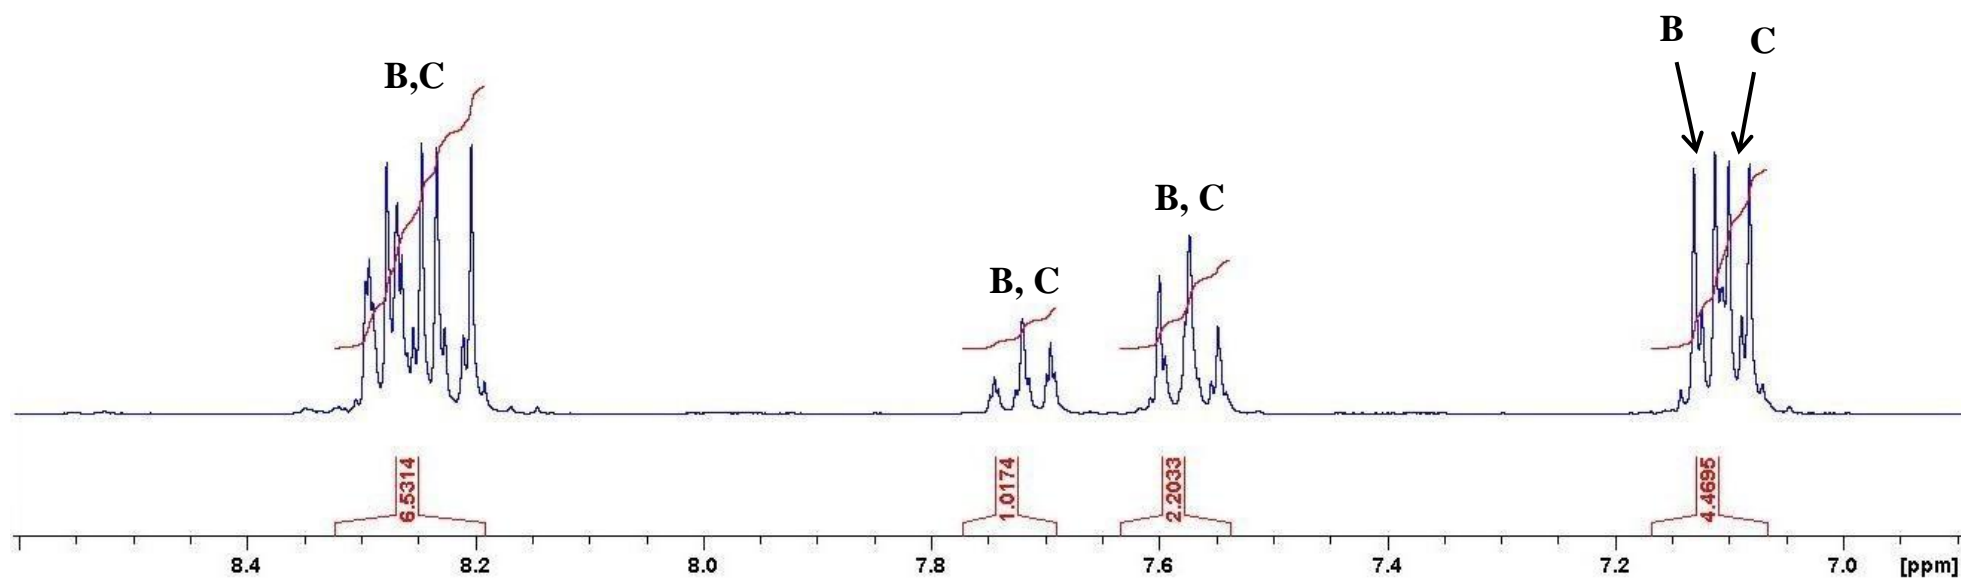

Expanded  $^1\text{H}$  NMR spectrum of the product mixture obtained in entry c of Table 3 (acetone- $d_6$ )

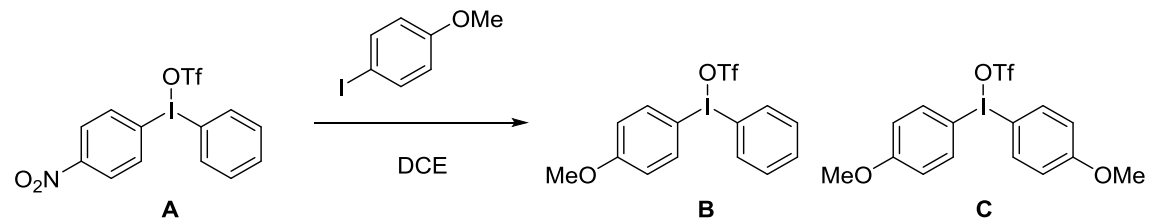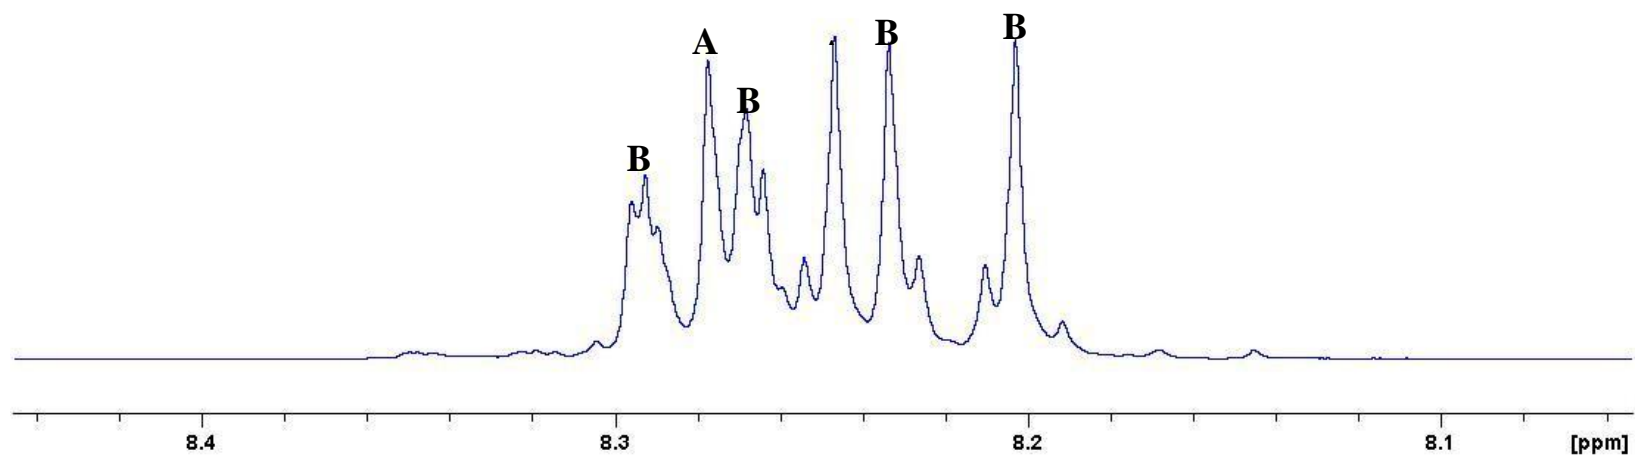

Expanded  $^1\text{H}$  NMR spectrum of the product mixture obtained in entry c of Table 3 (acetone- $d_6$ )



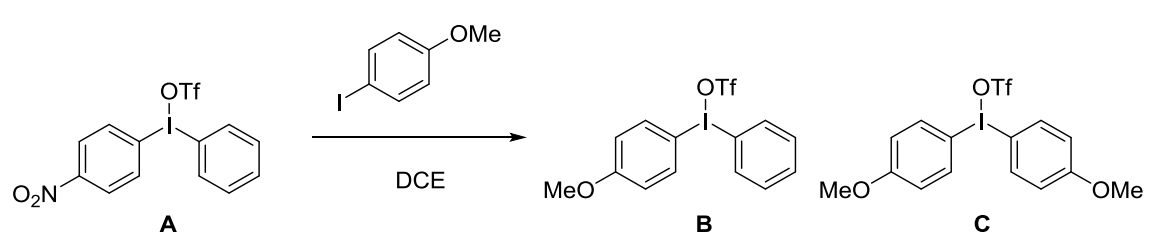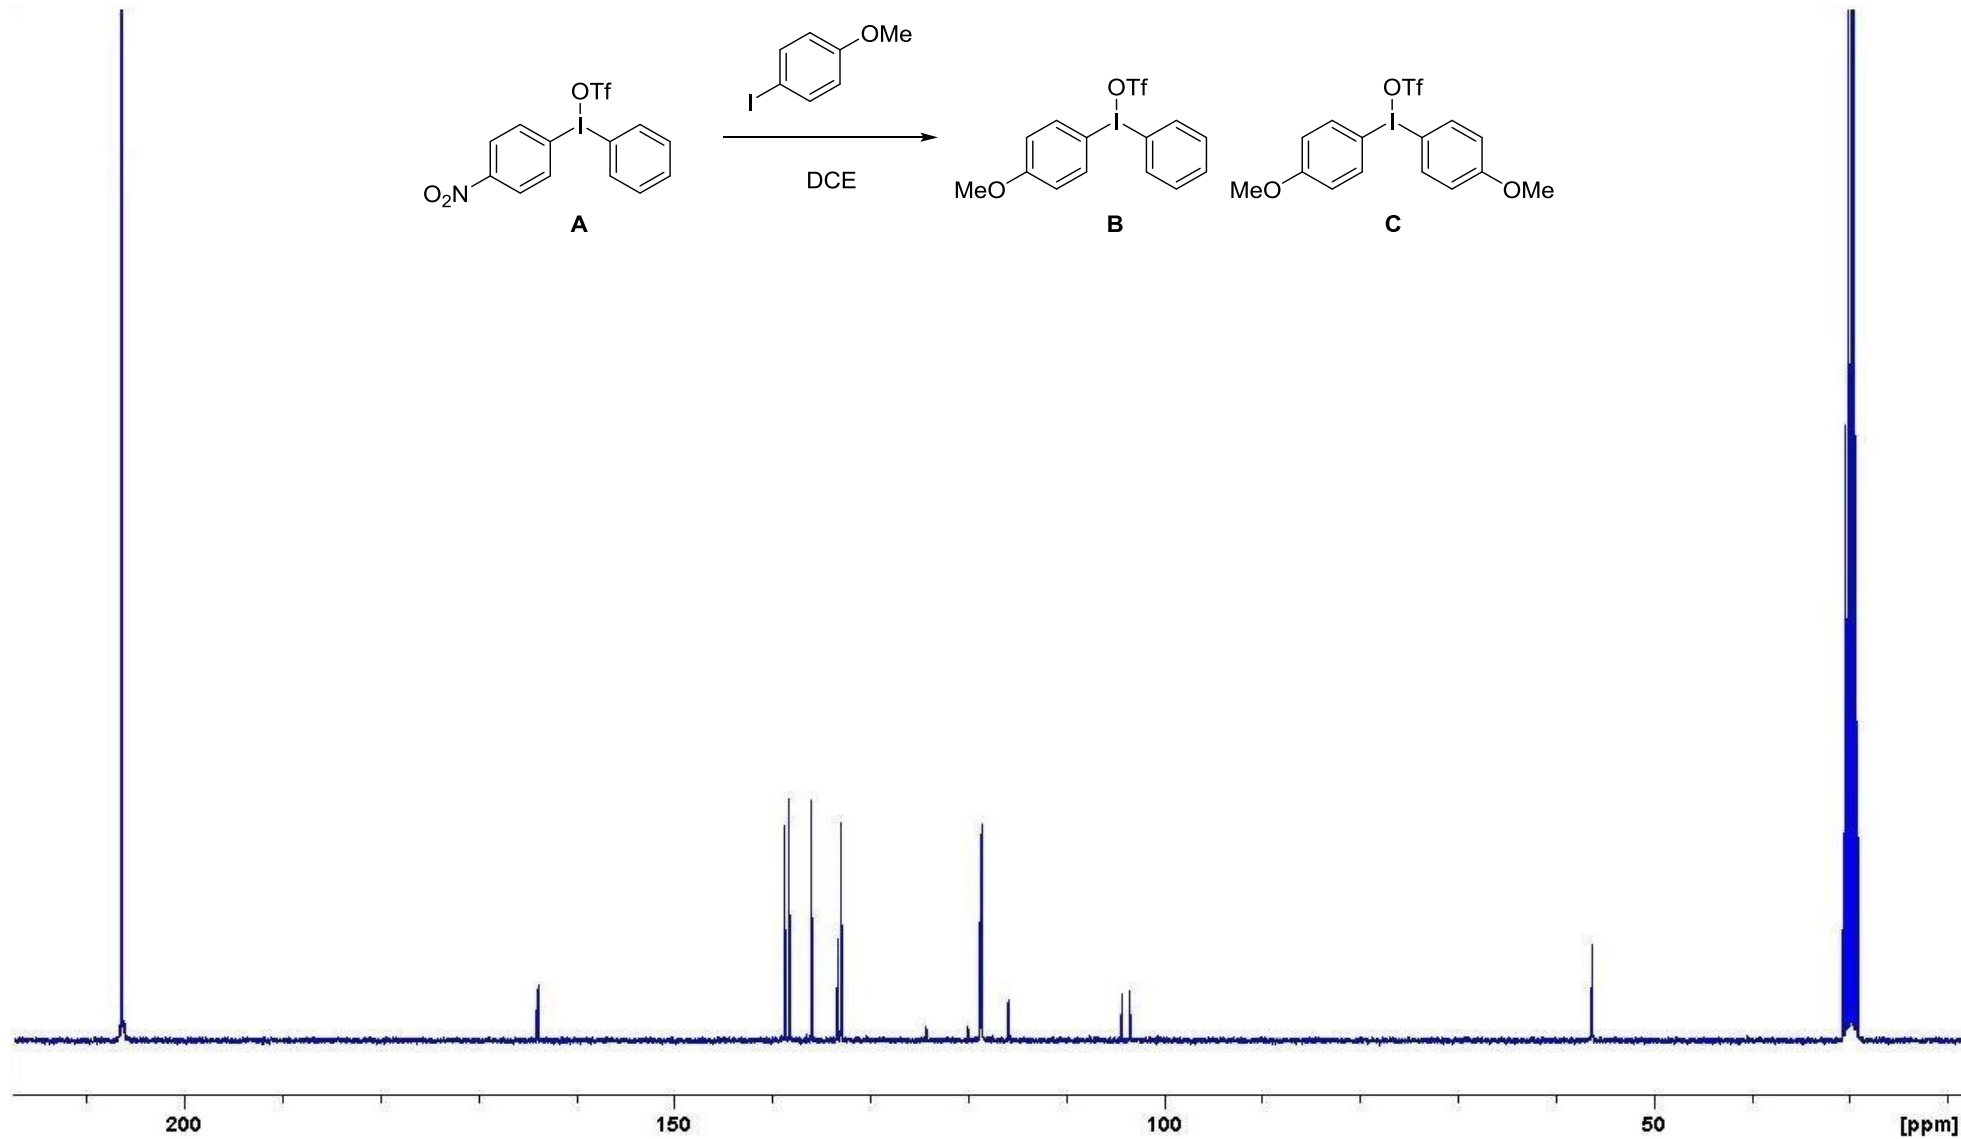

$^{13}\text{C}$  NMR spectrum of the product mixture obtained in entry c of Table 3 (acetone- $d_6$ )

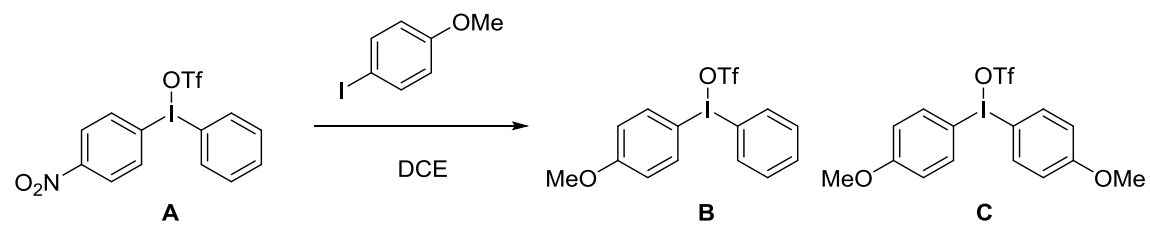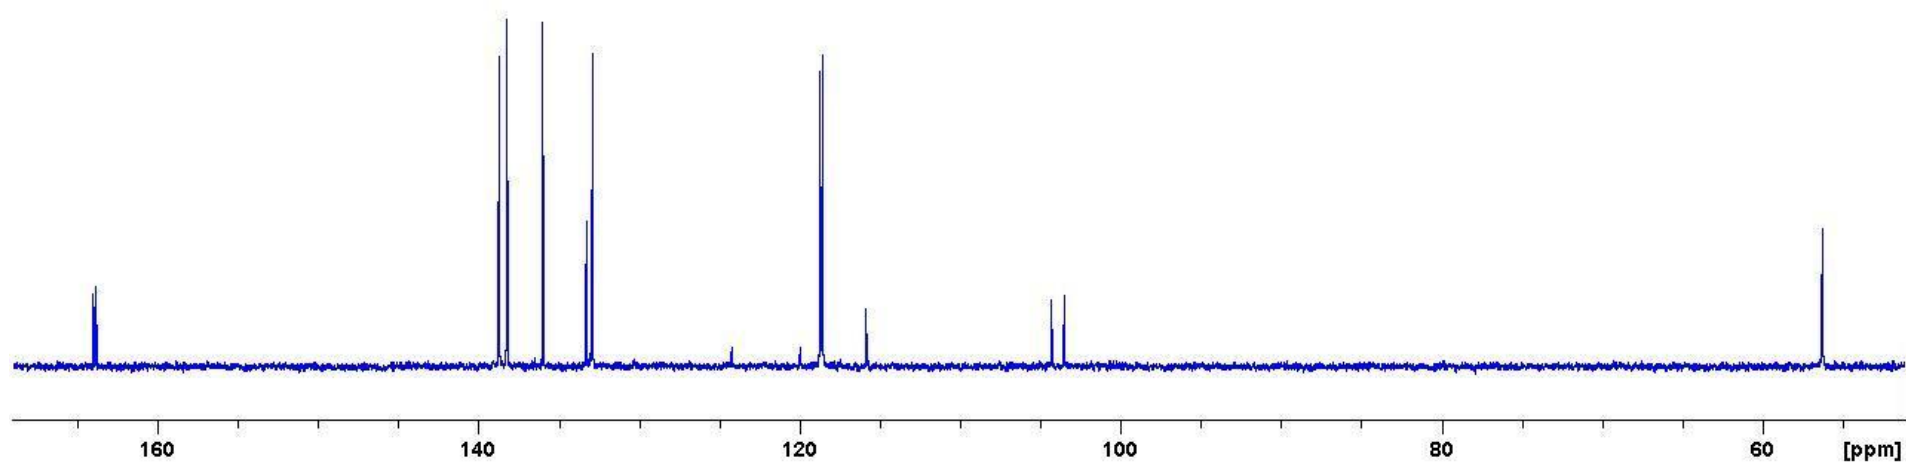

Expanded  $^{13}\text{C}$  NMR spectrum of the product mixture obtained in entry c of Table 3 (acetone- $d_6$ )

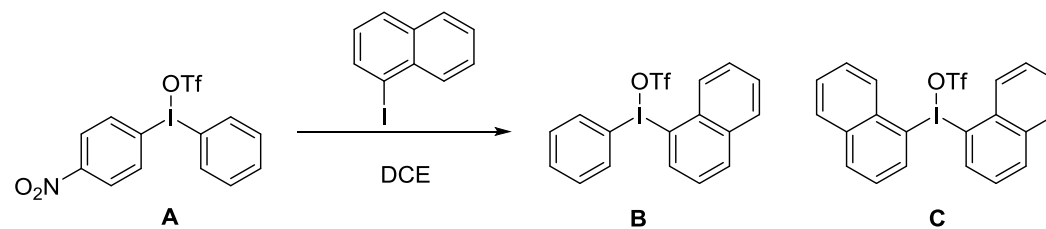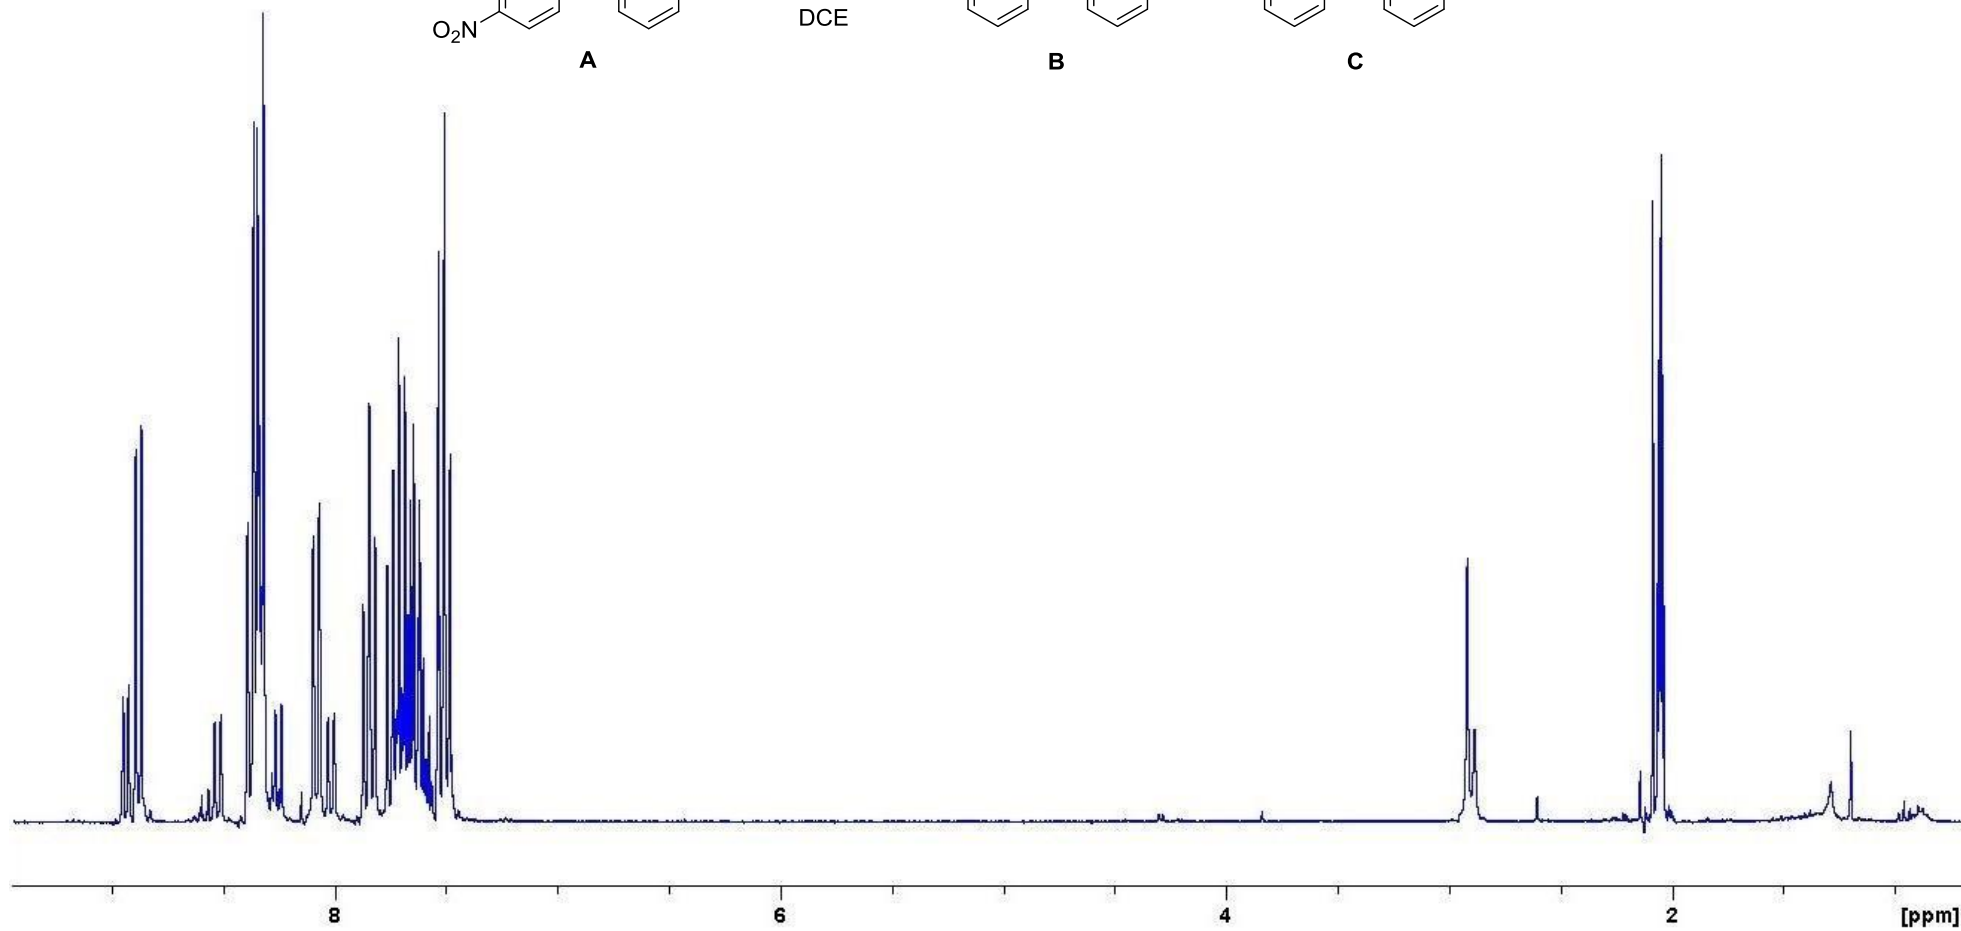

$^1\text{H}$  NMR spectrum of the product mixture obtained in entry d of Table 3 ( $\text{acetone-}d_6$ )

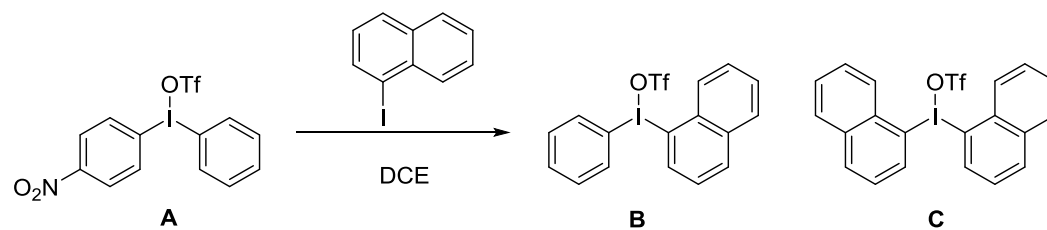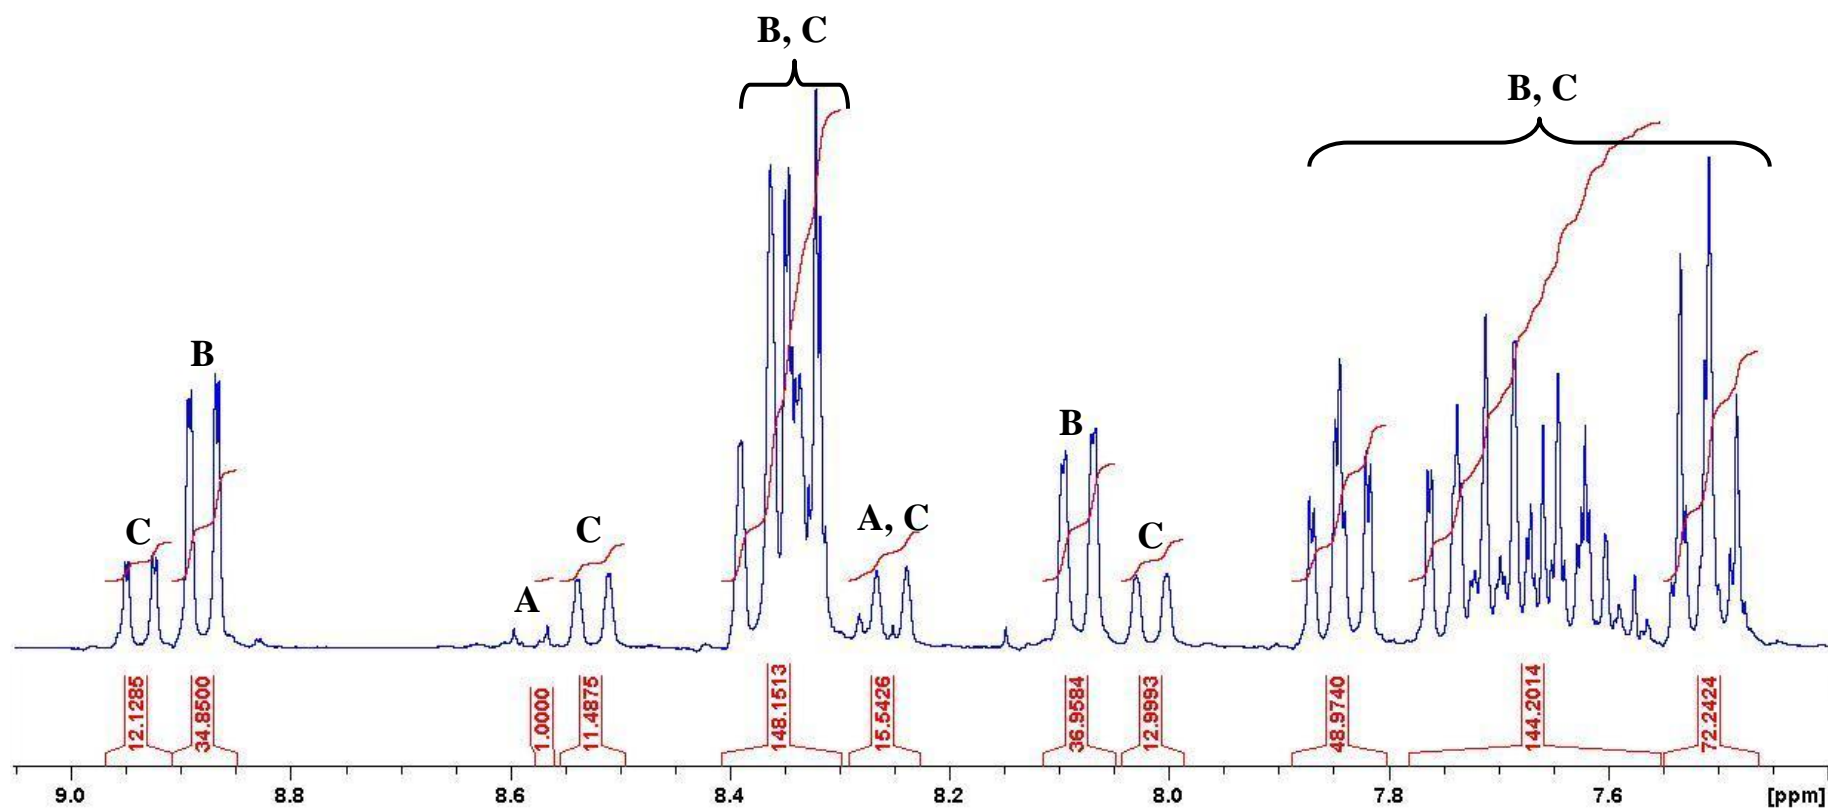

Expanded  $^1\text{H}$  NMR spectrum of the product mixture obtained in entry d of Table 3 ( $\text{acetone-}d_6$ )

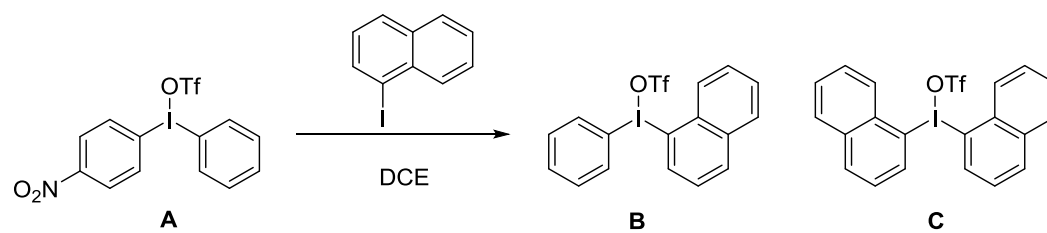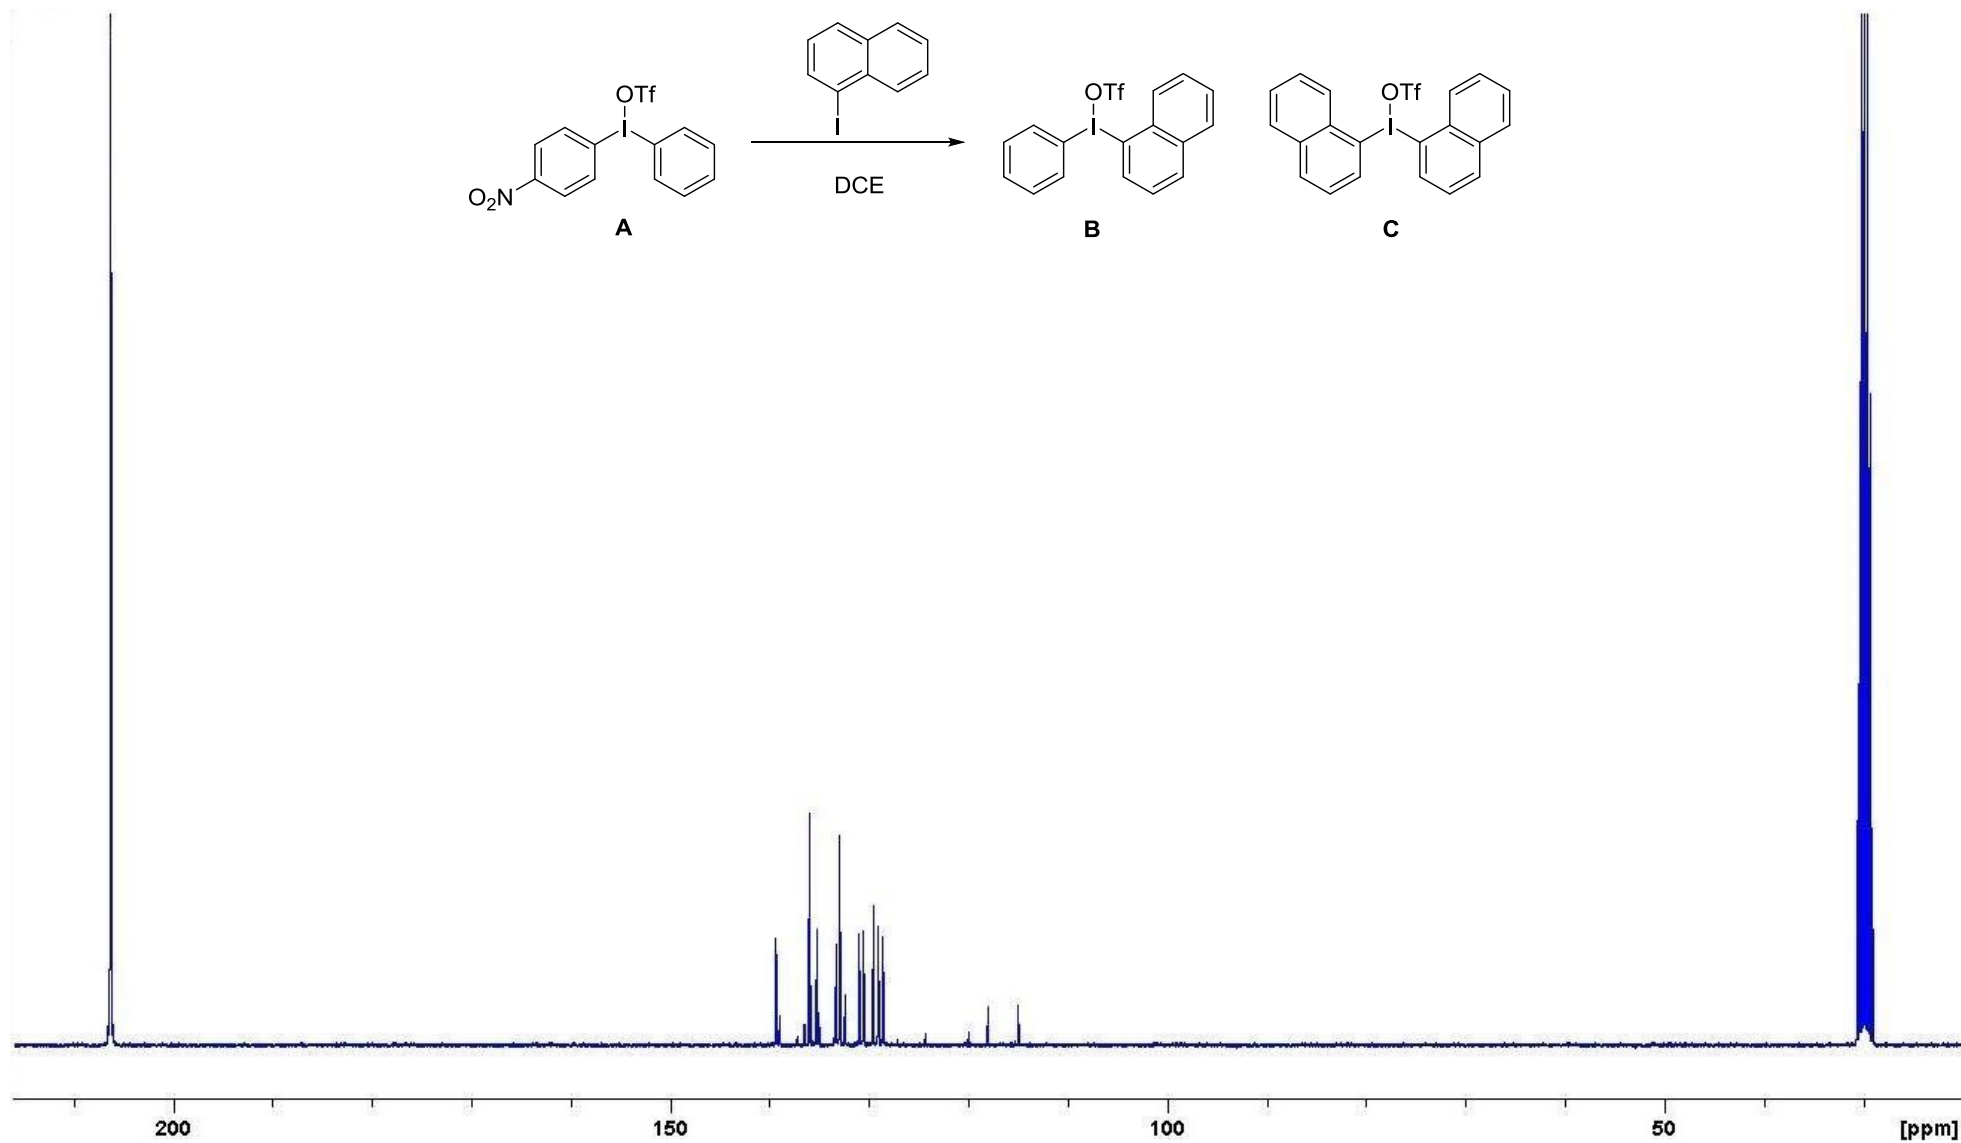

<sup>13</sup>C NMR spectrum of the product mixture obtained in entry d of Table 3 (acetone-*d*<sub>6</sub>)

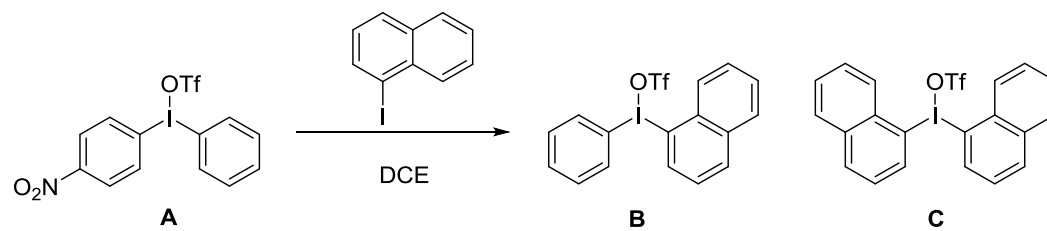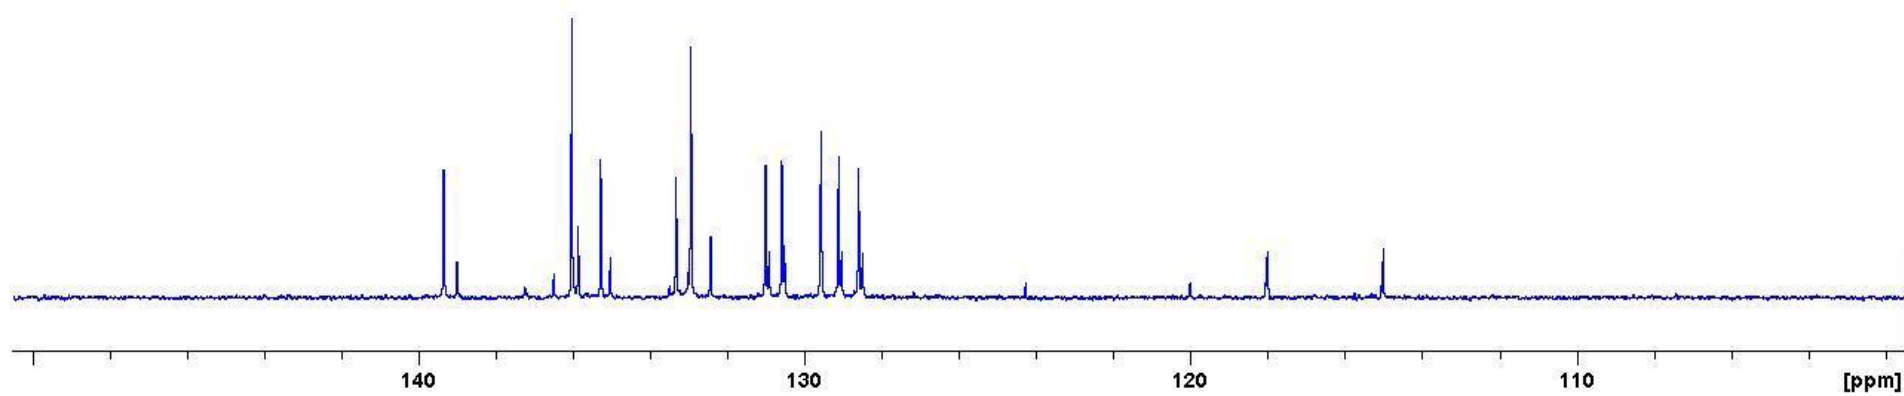

Expanded  $^{13}\text{C}$  NMR spectrum of the product mixture obtained in entry d of Table 3 (acetone- $d_6$ )

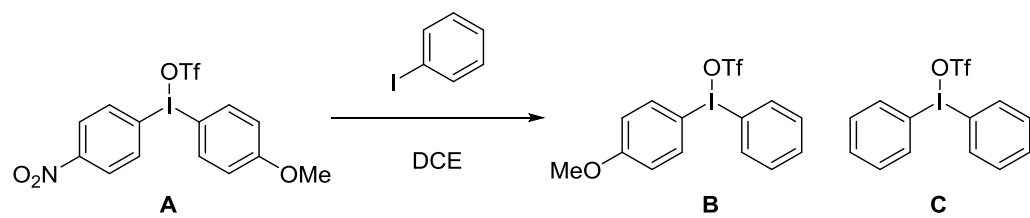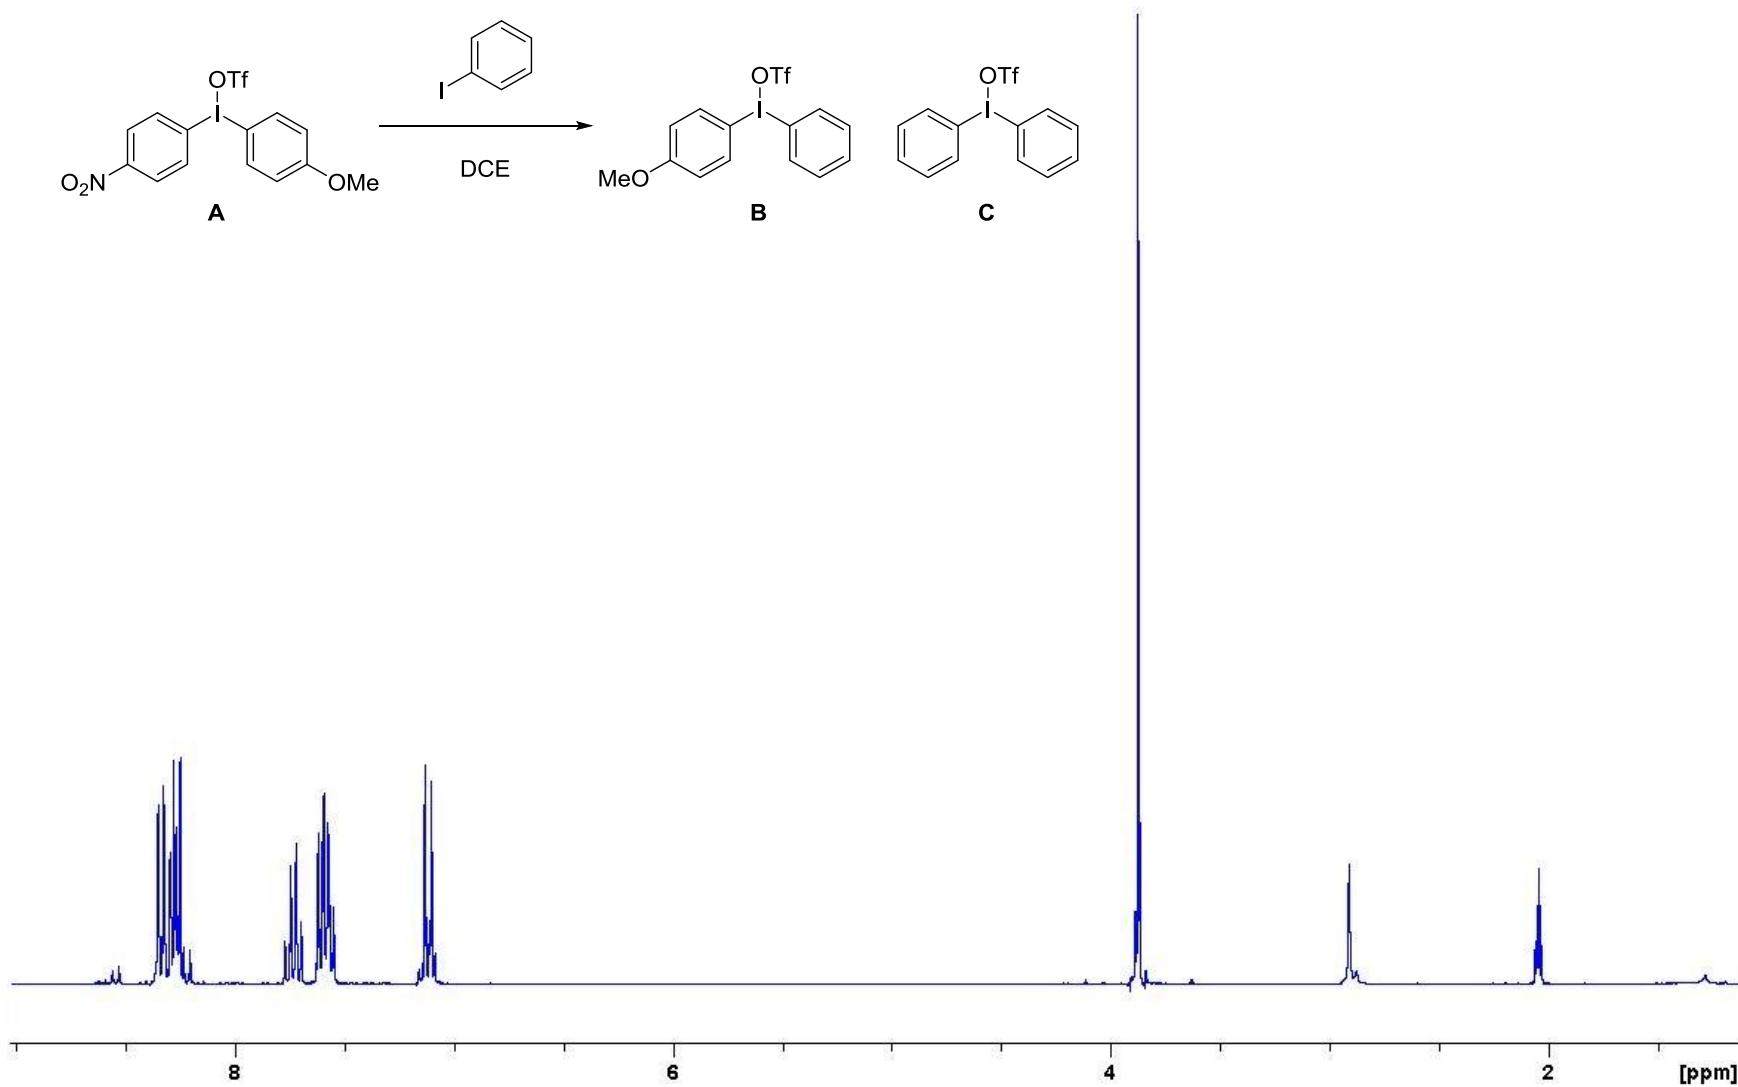

$^1\text{H}$  NMR spectrum of the product mixture obtained in entry e of Table 3 ( $\text{acetone-}d_6$ )

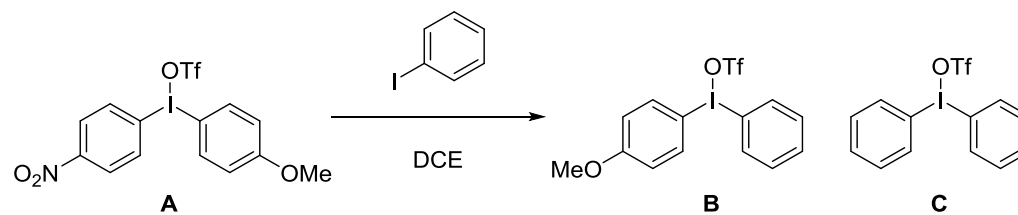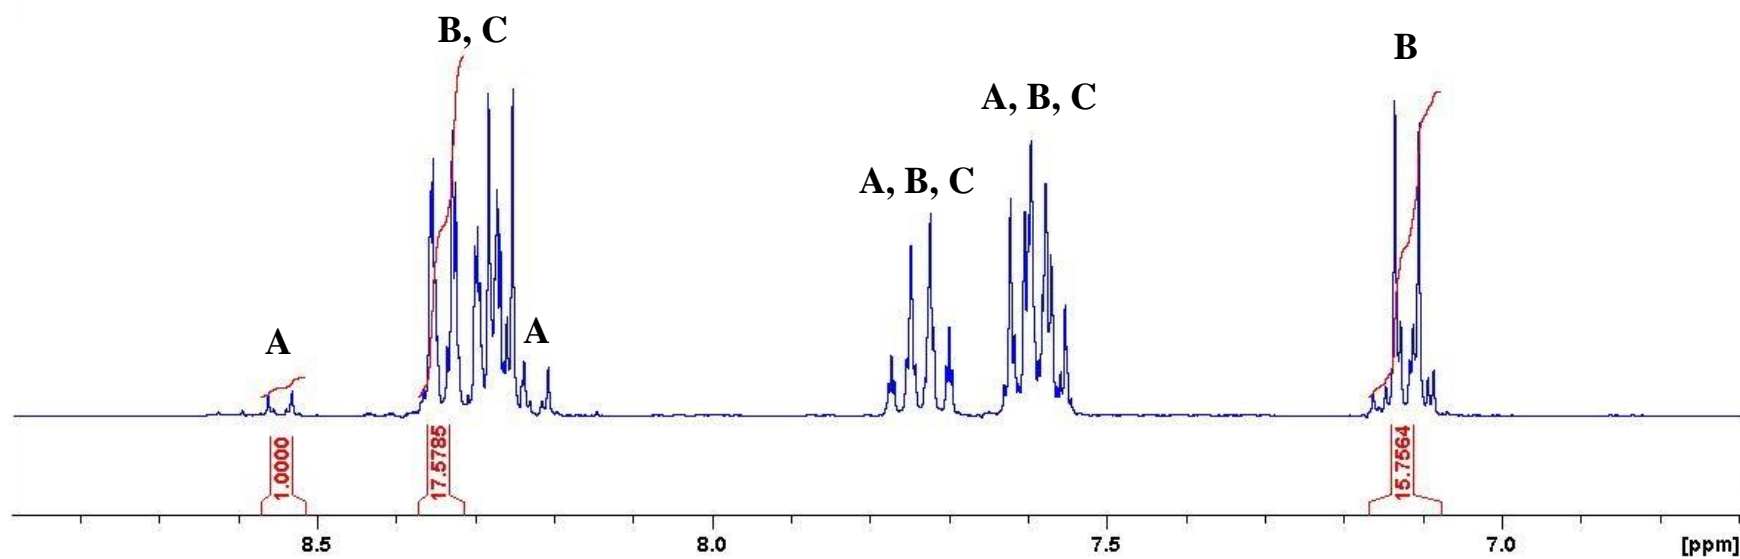

Expanded  $^1\text{H}$  NMR spectrum of the product mixture obtained in entry e of Table 3 (acetone- $d_6$ )



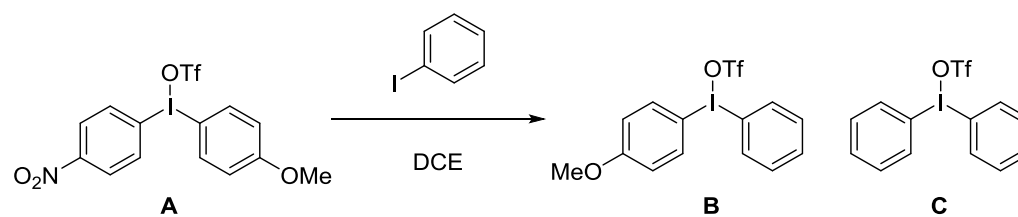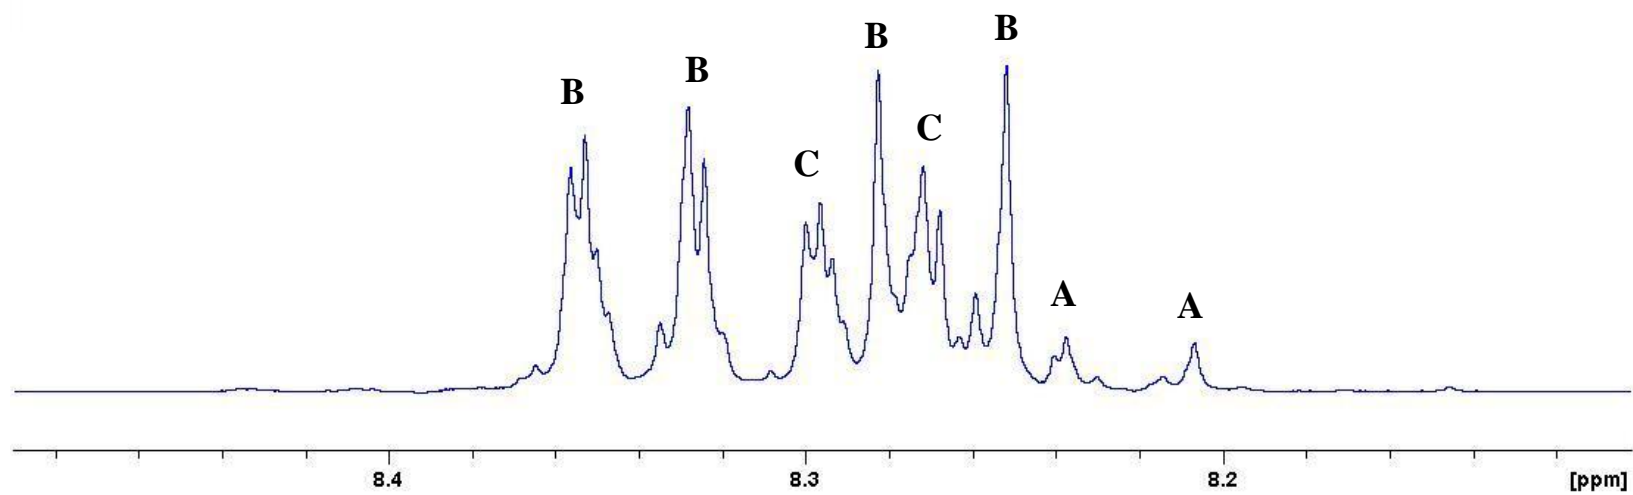

Expanded  $^1\text{H}$  NMR spectrum of the product mixture obtained in entry e of Table 3 ( $\text{acetone-}d_6$ )

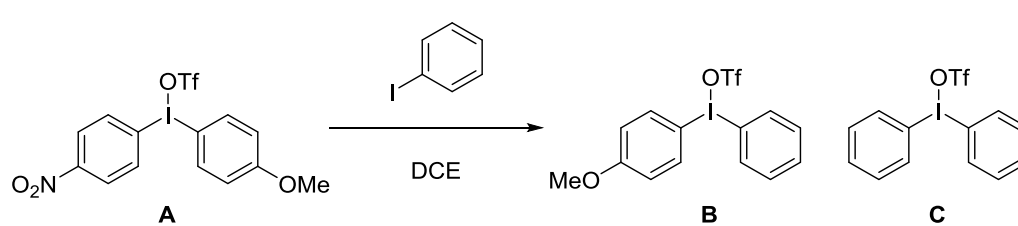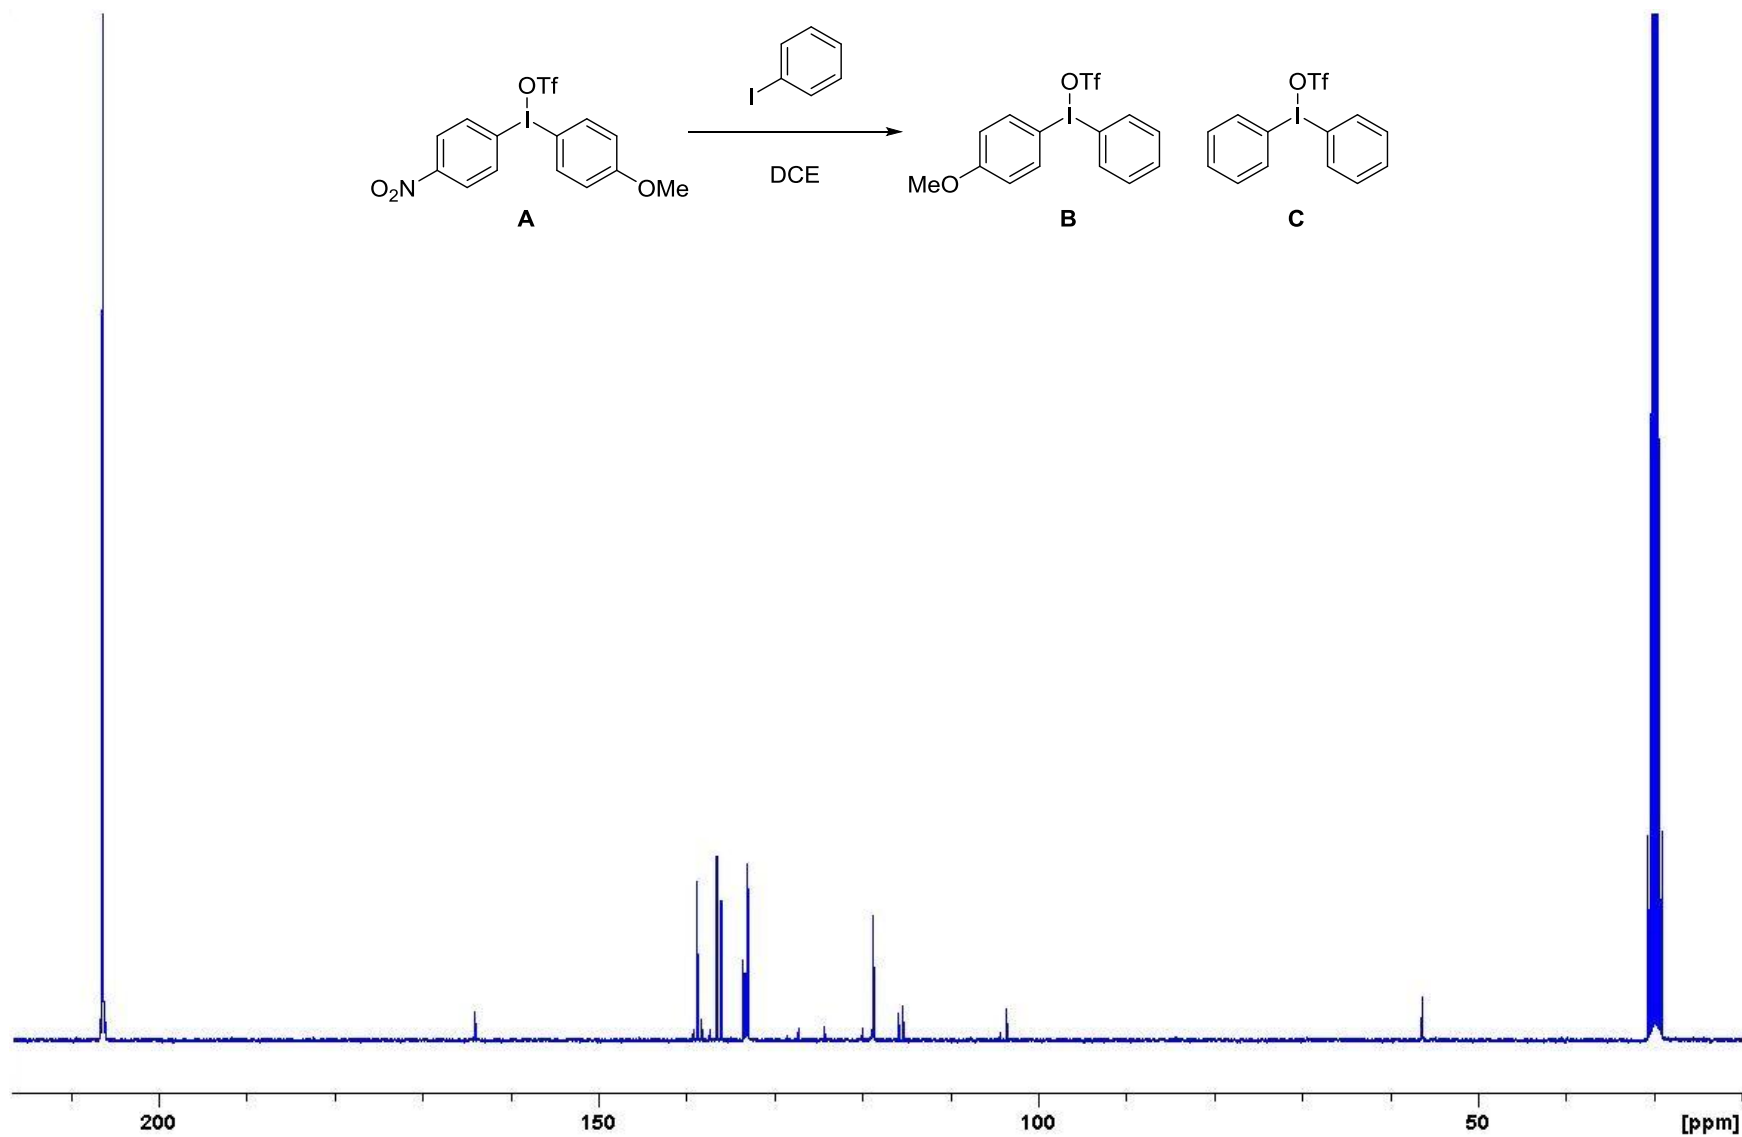

$^{13}\text{C}$  NMR spectrum of the product mixture obtained in entry e of Table 3 (acetone- $d_6$ )

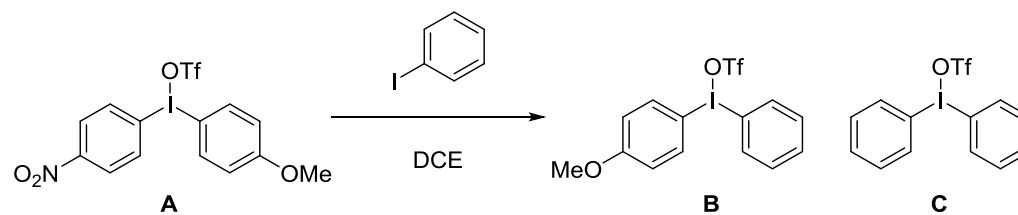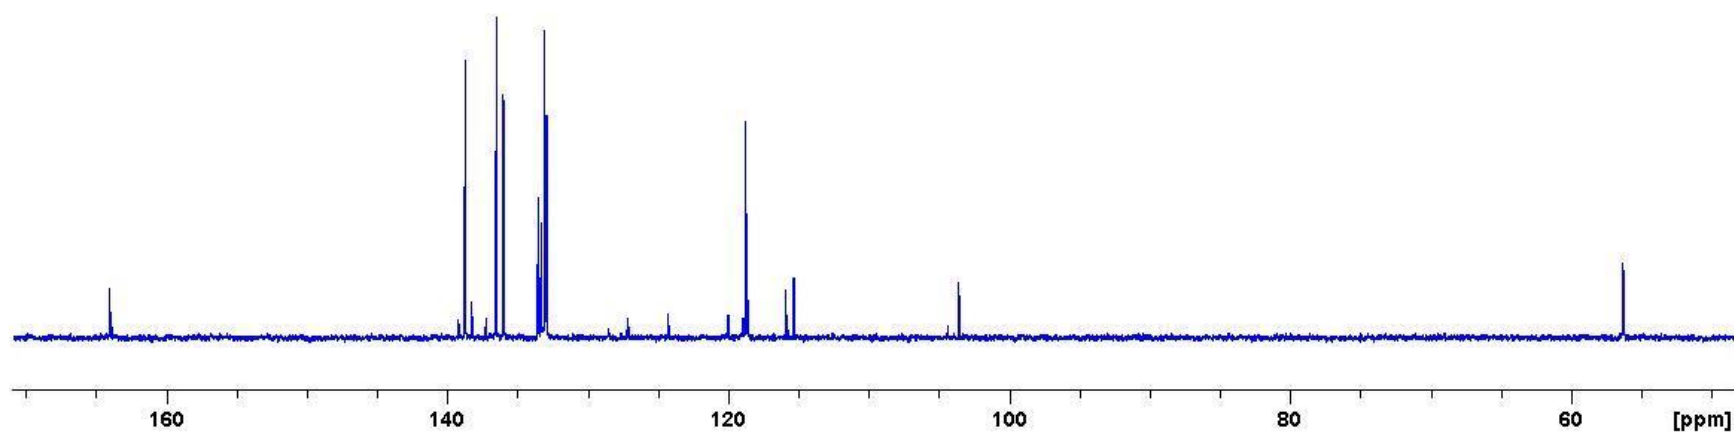

Expanded  $^{13}\text{C}$  NMR spectrum of the product mixture obtained in entry e of Table 3 (acetone- $d_6$ )

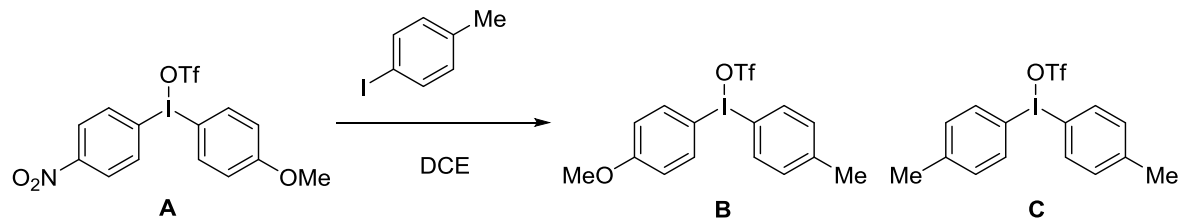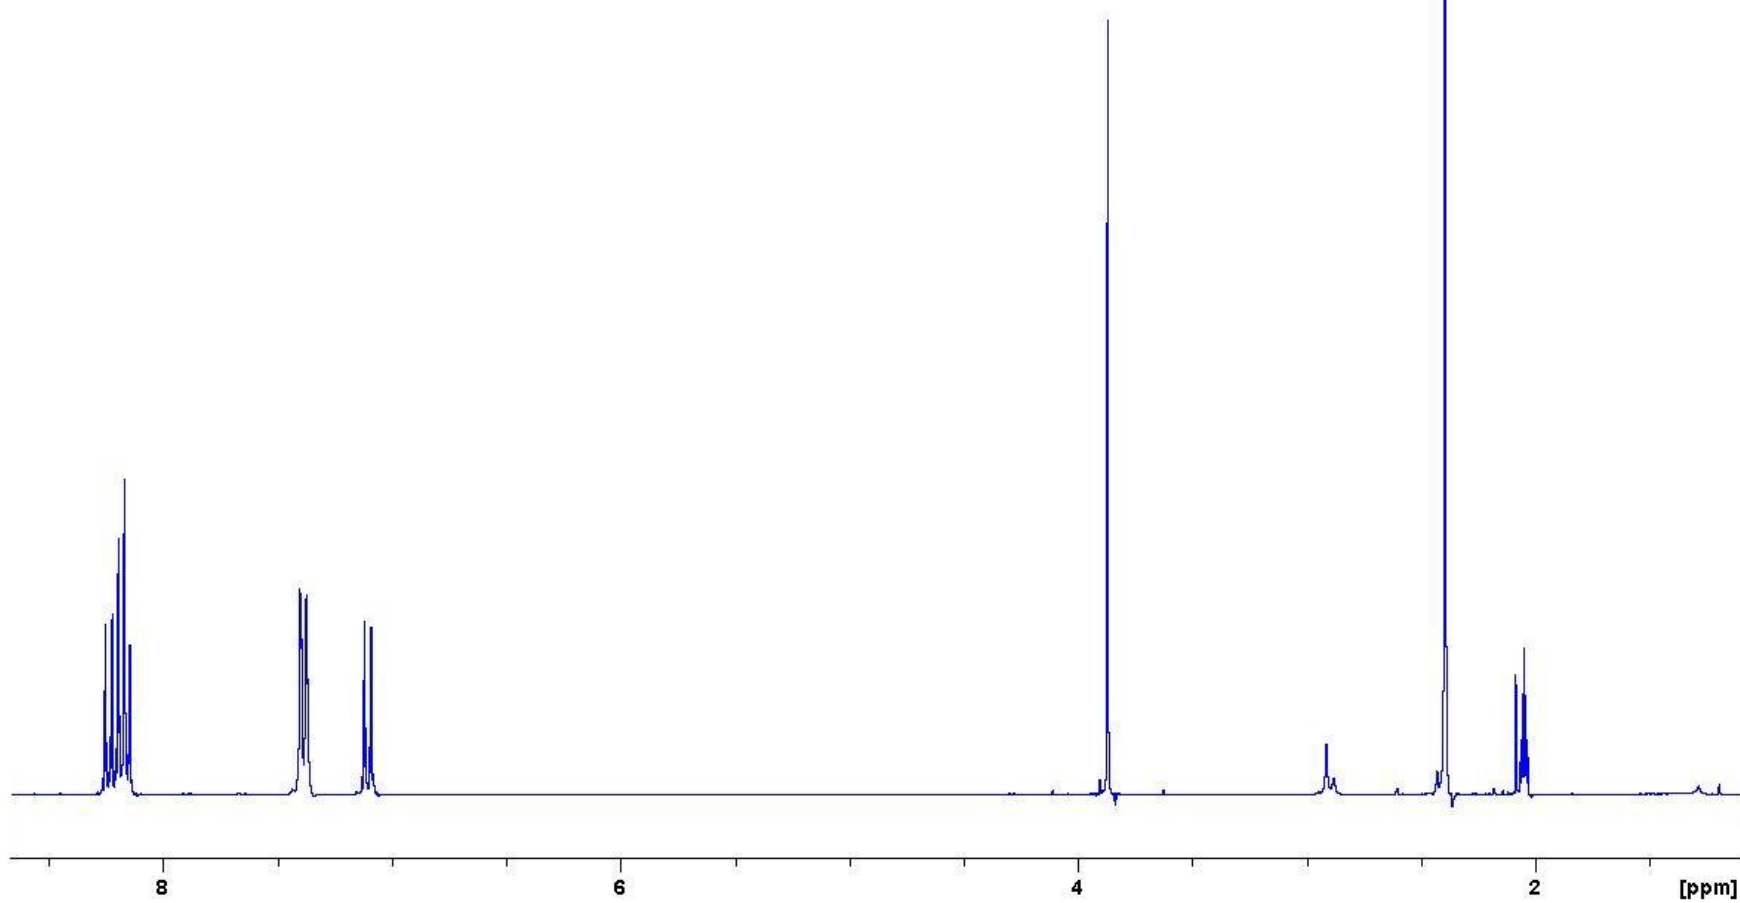

$^1\text{H}$  NMR spectrum of the product mixture obtained in entry f of Table 3 (acetone- $d_6$ )

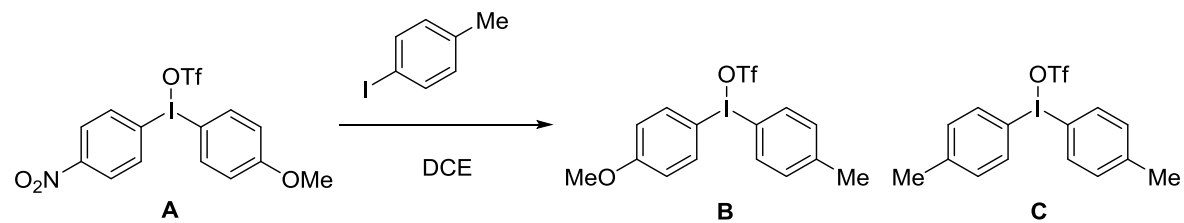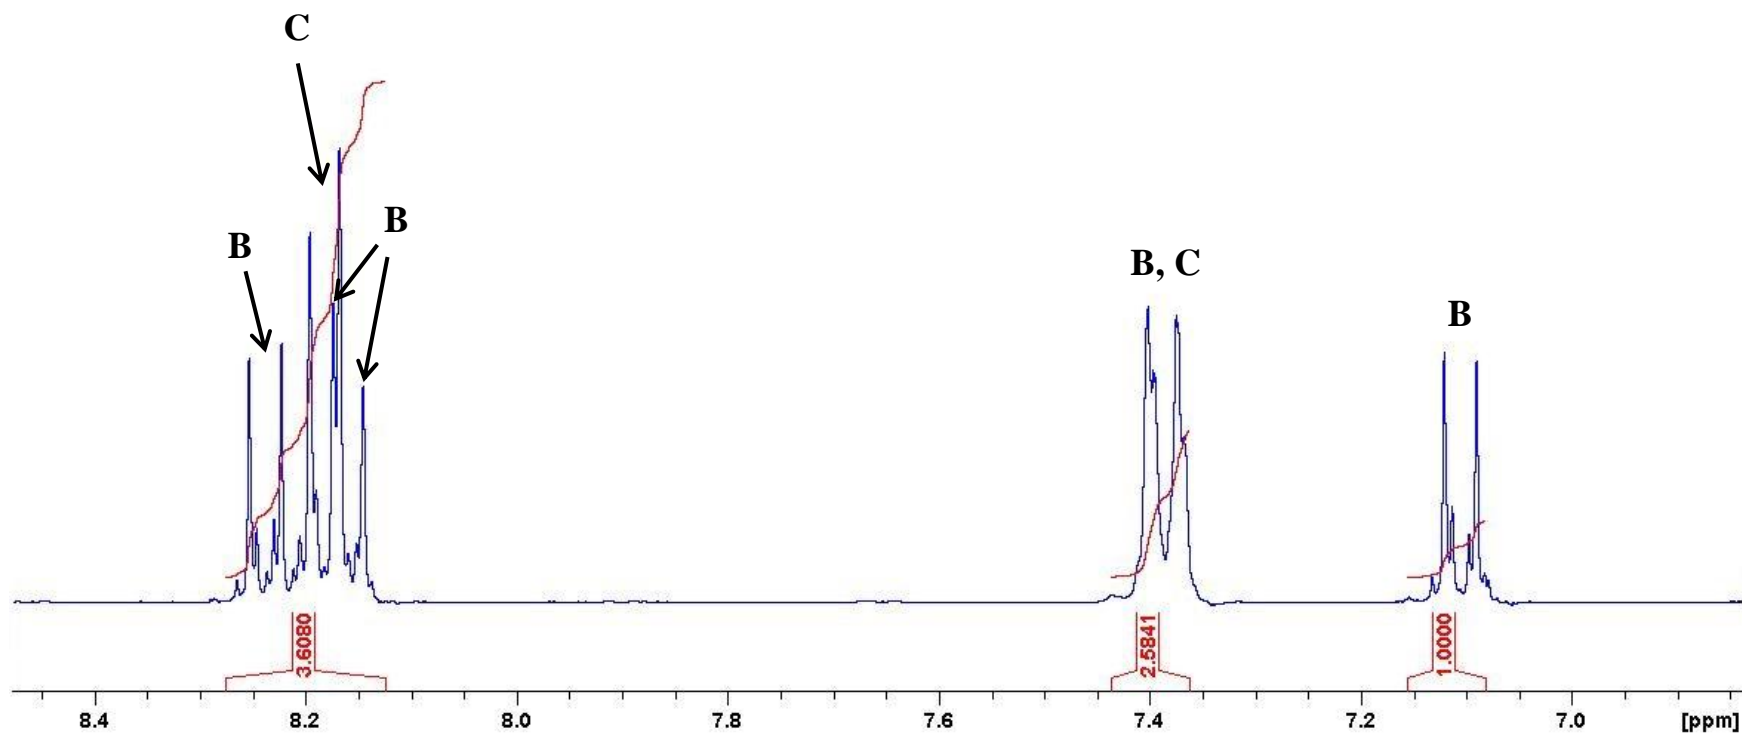

Expanded  $^1\text{H}$  NMR spectrum of the product mixture obtained in entry f of Table 3 ( $\text{acetone-}d_6$ )

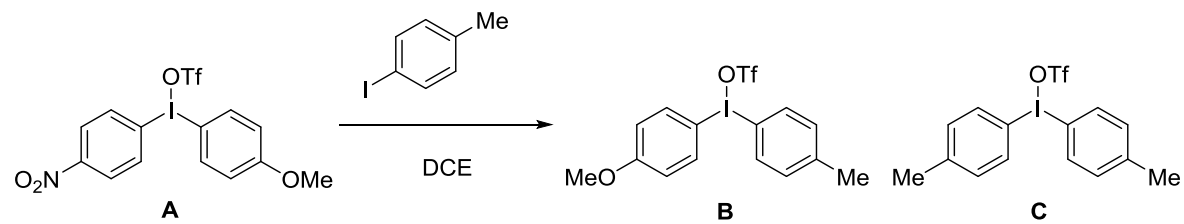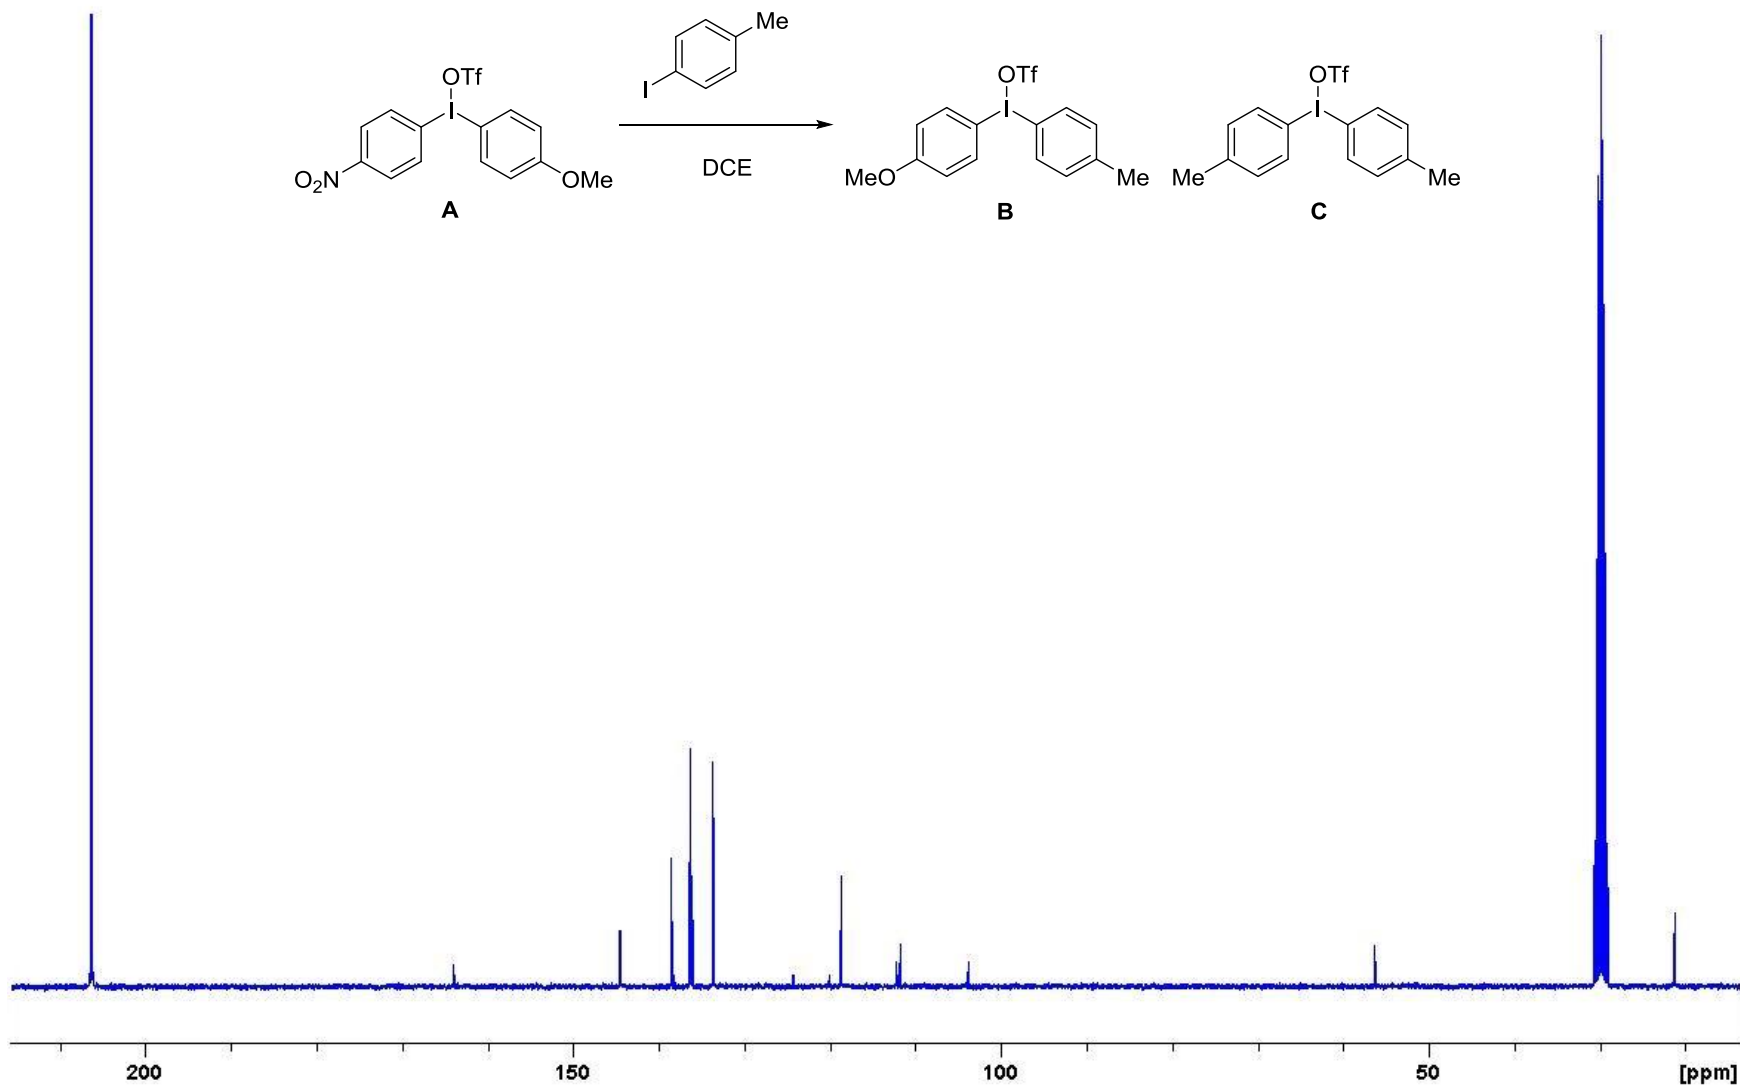

$^{13}\text{C}$  NMR spectrum of the product mixture obtained in entry f of Table 3 ( $\text{acetone-}d_6$ )

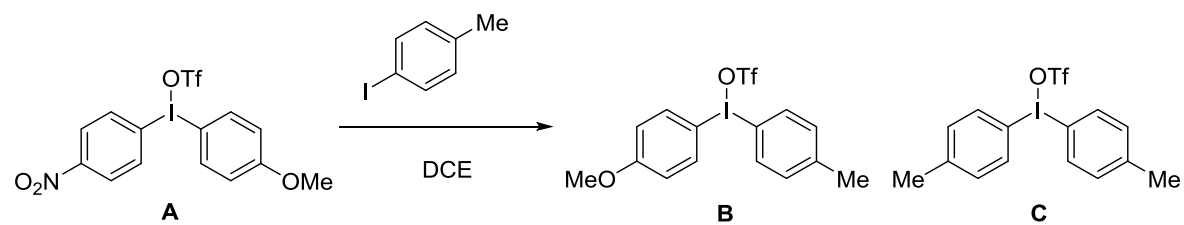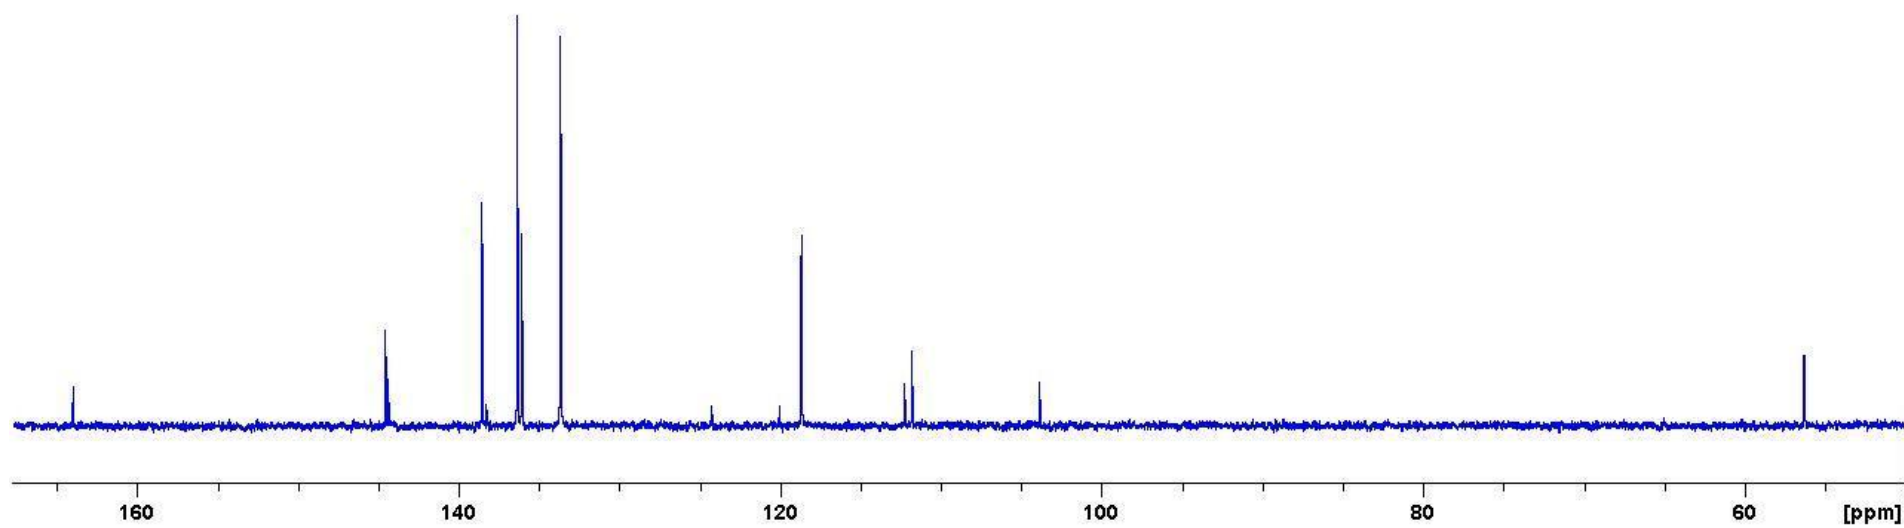

Expanded  $^{13}\text{C}$  NMR spectrum of the product mixture obtained in entry f of Table 3 (acetone- $d_6$ )

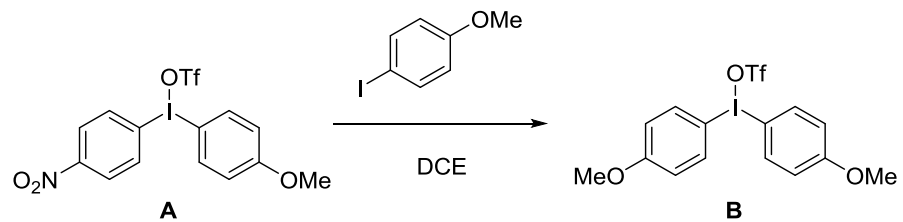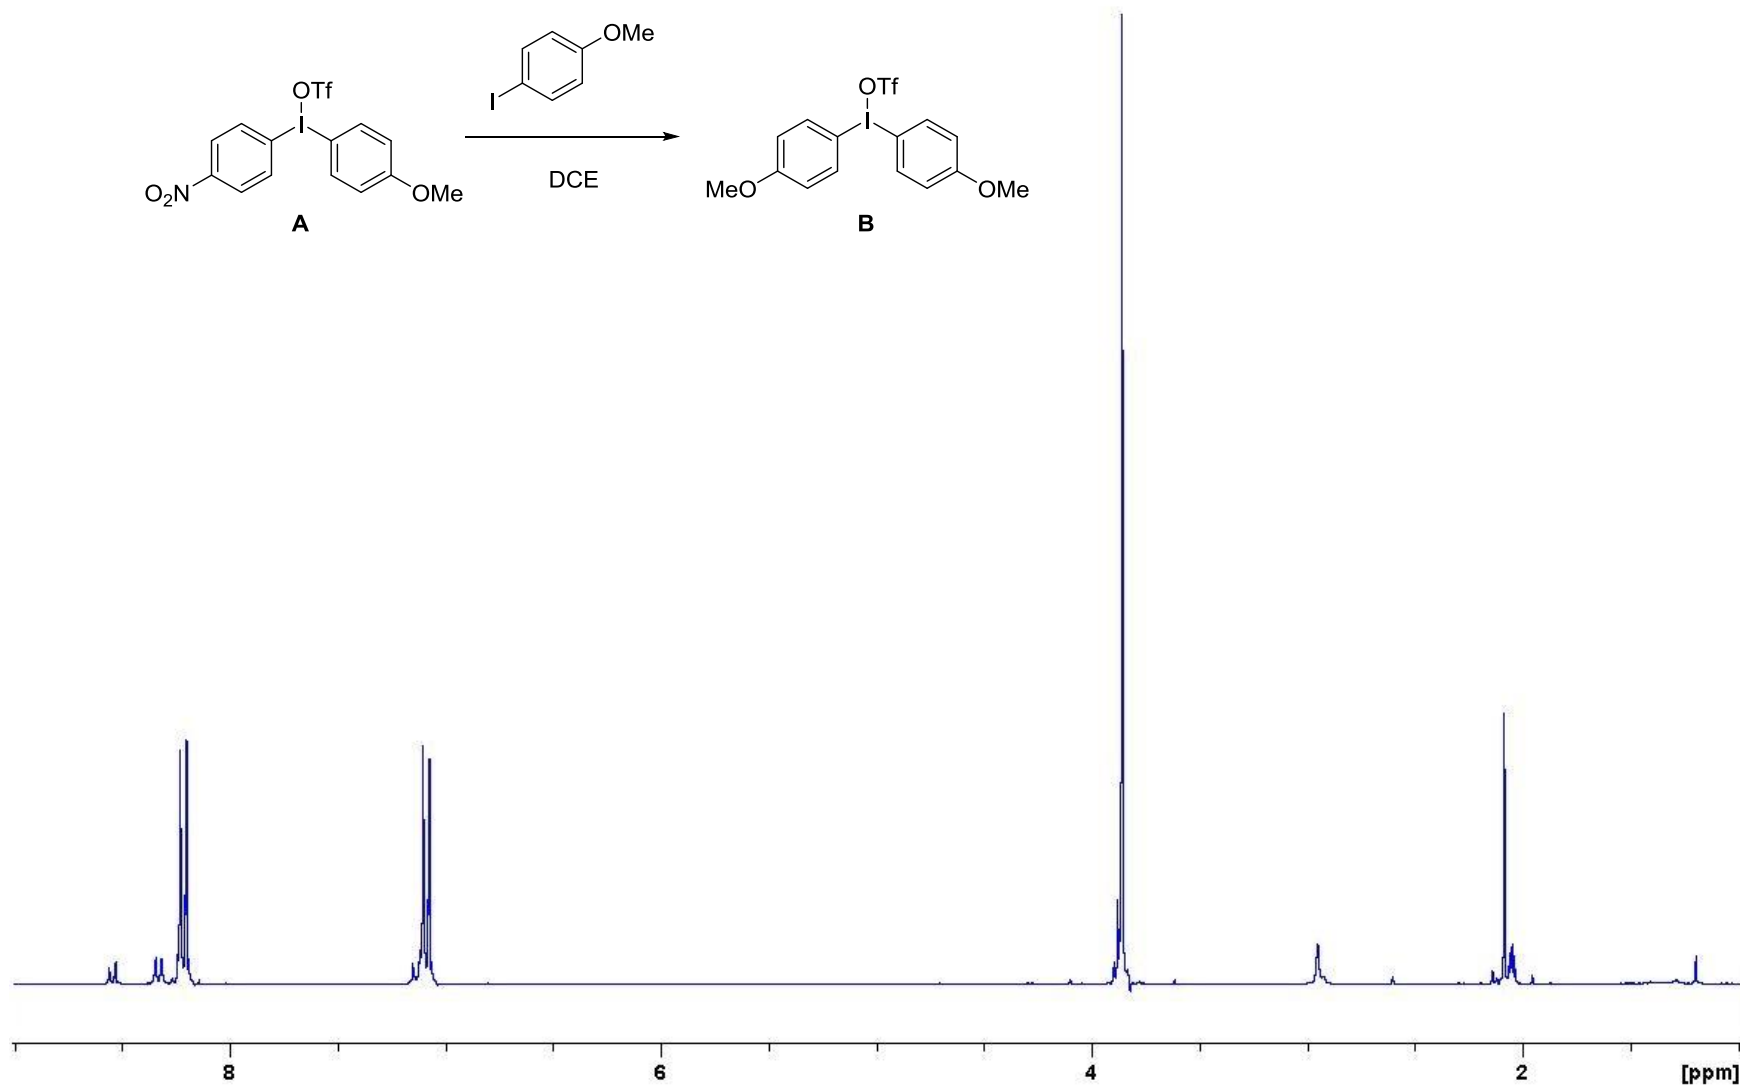

**<sup>1</sup>H NMR spectrum of the product mixture obtained in entry g of Table 3 (acetone-*d*<sub>6</sub>)**



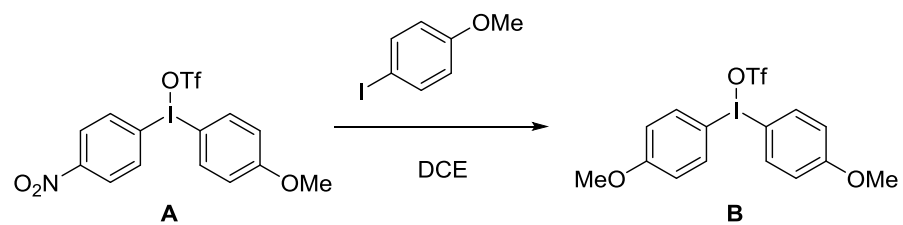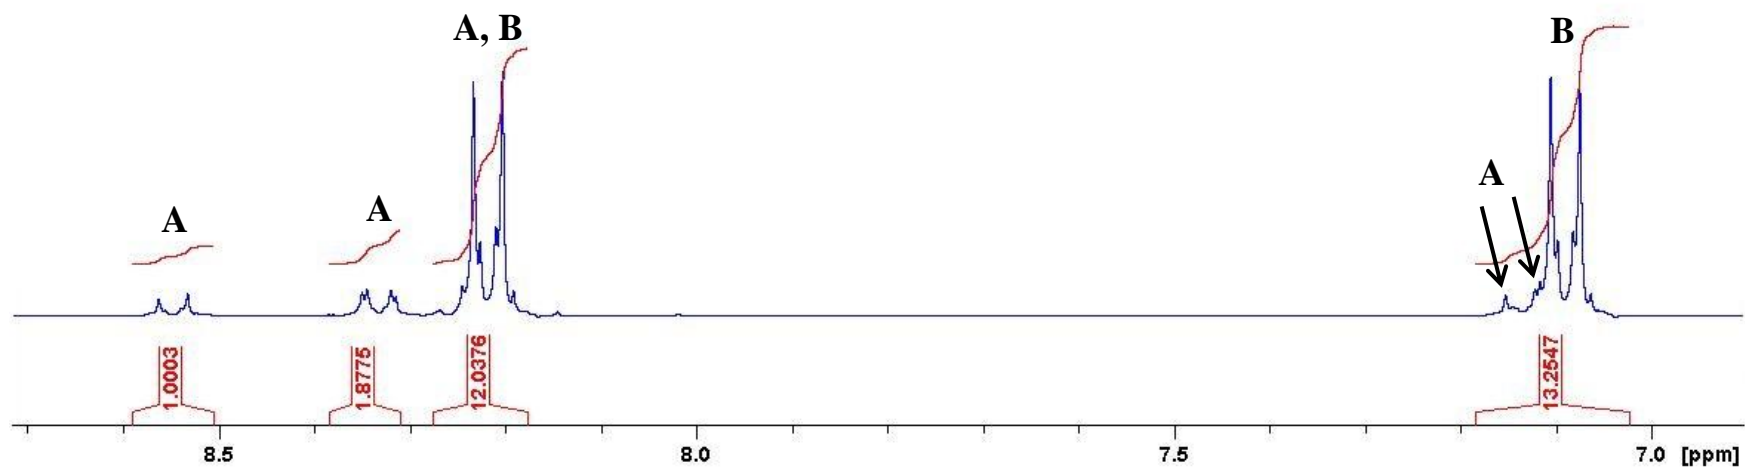

Expanded <sup>1</sup>H NMR spectrum of the product mixture obtained in entry g of Table 3 (acetone-*d*<sub>6</sub>)

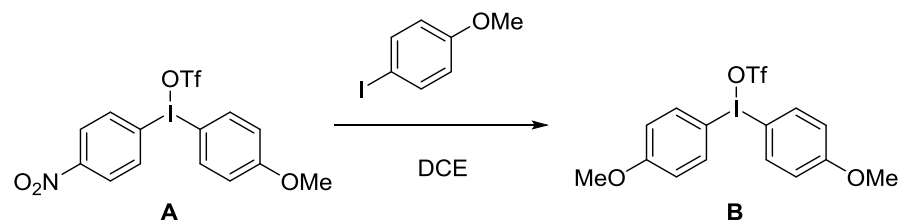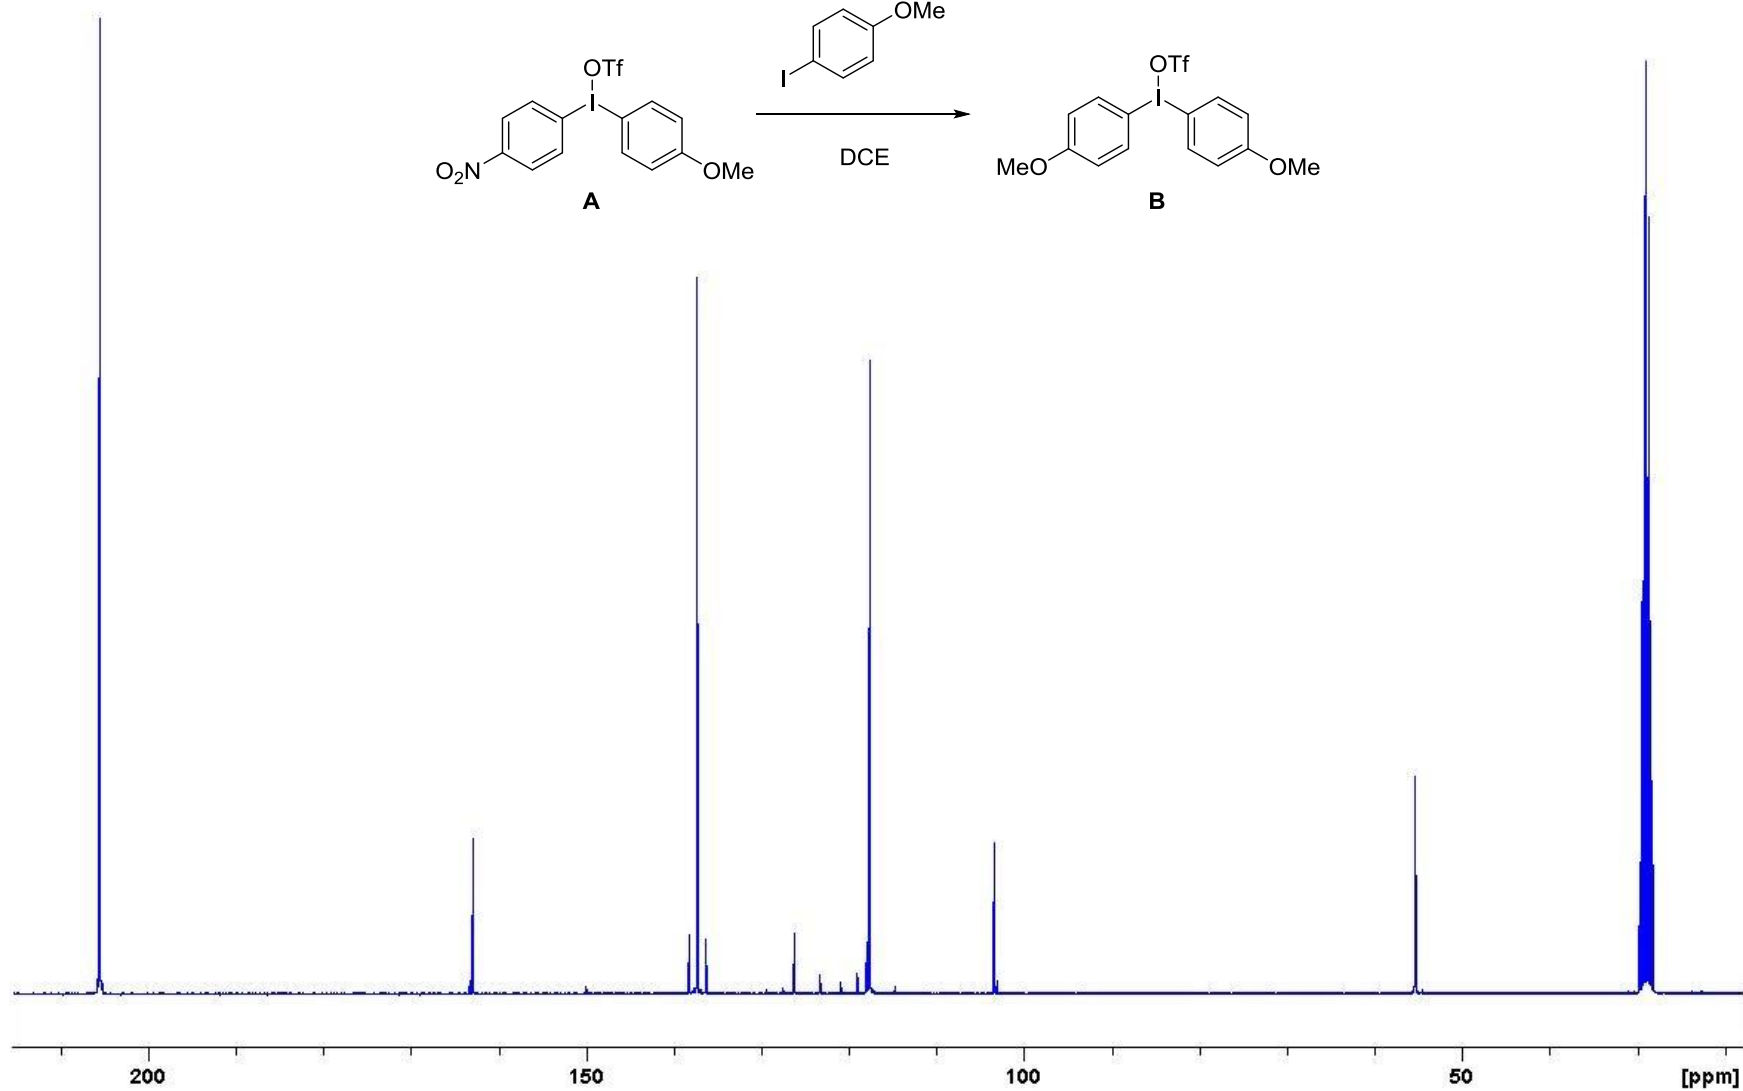

$^{13}\text{C}$  NMR spectrum of the product mixture obtained in entry g of Table 3 (acetone- $d_6$ )

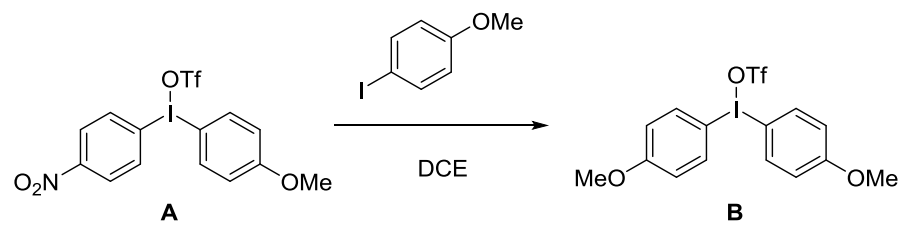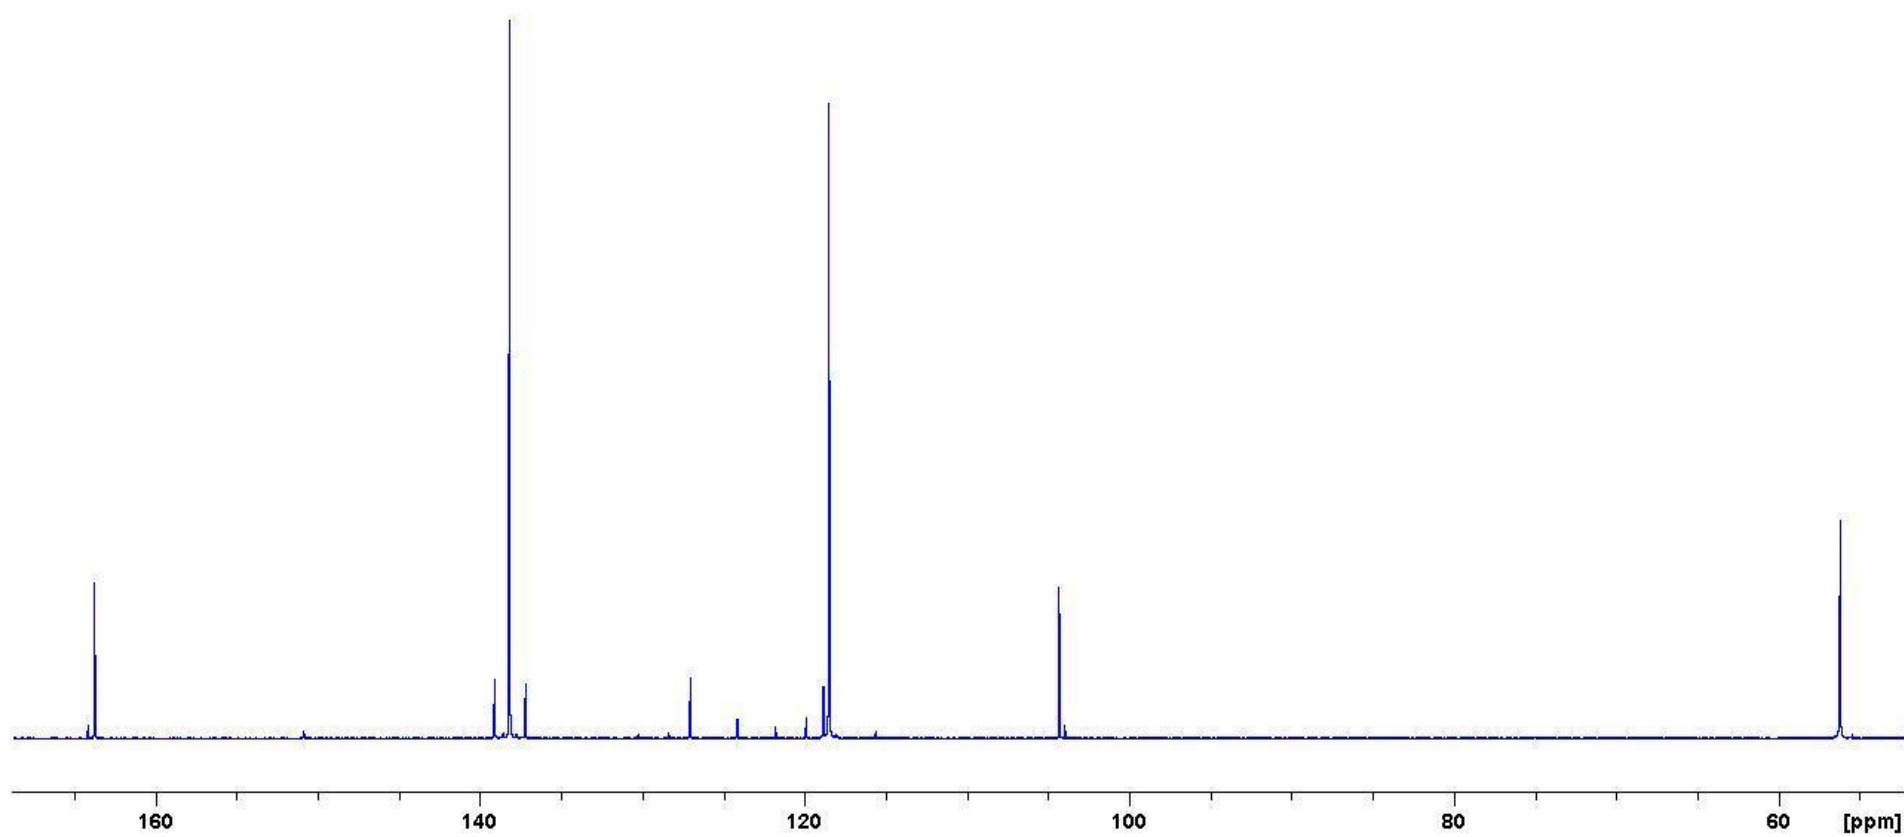

Expanded  $^{13}\text{C}$  NMR spectrum of the product mixture obtained in entry g of Table 3 (acetone- $d_6$ )

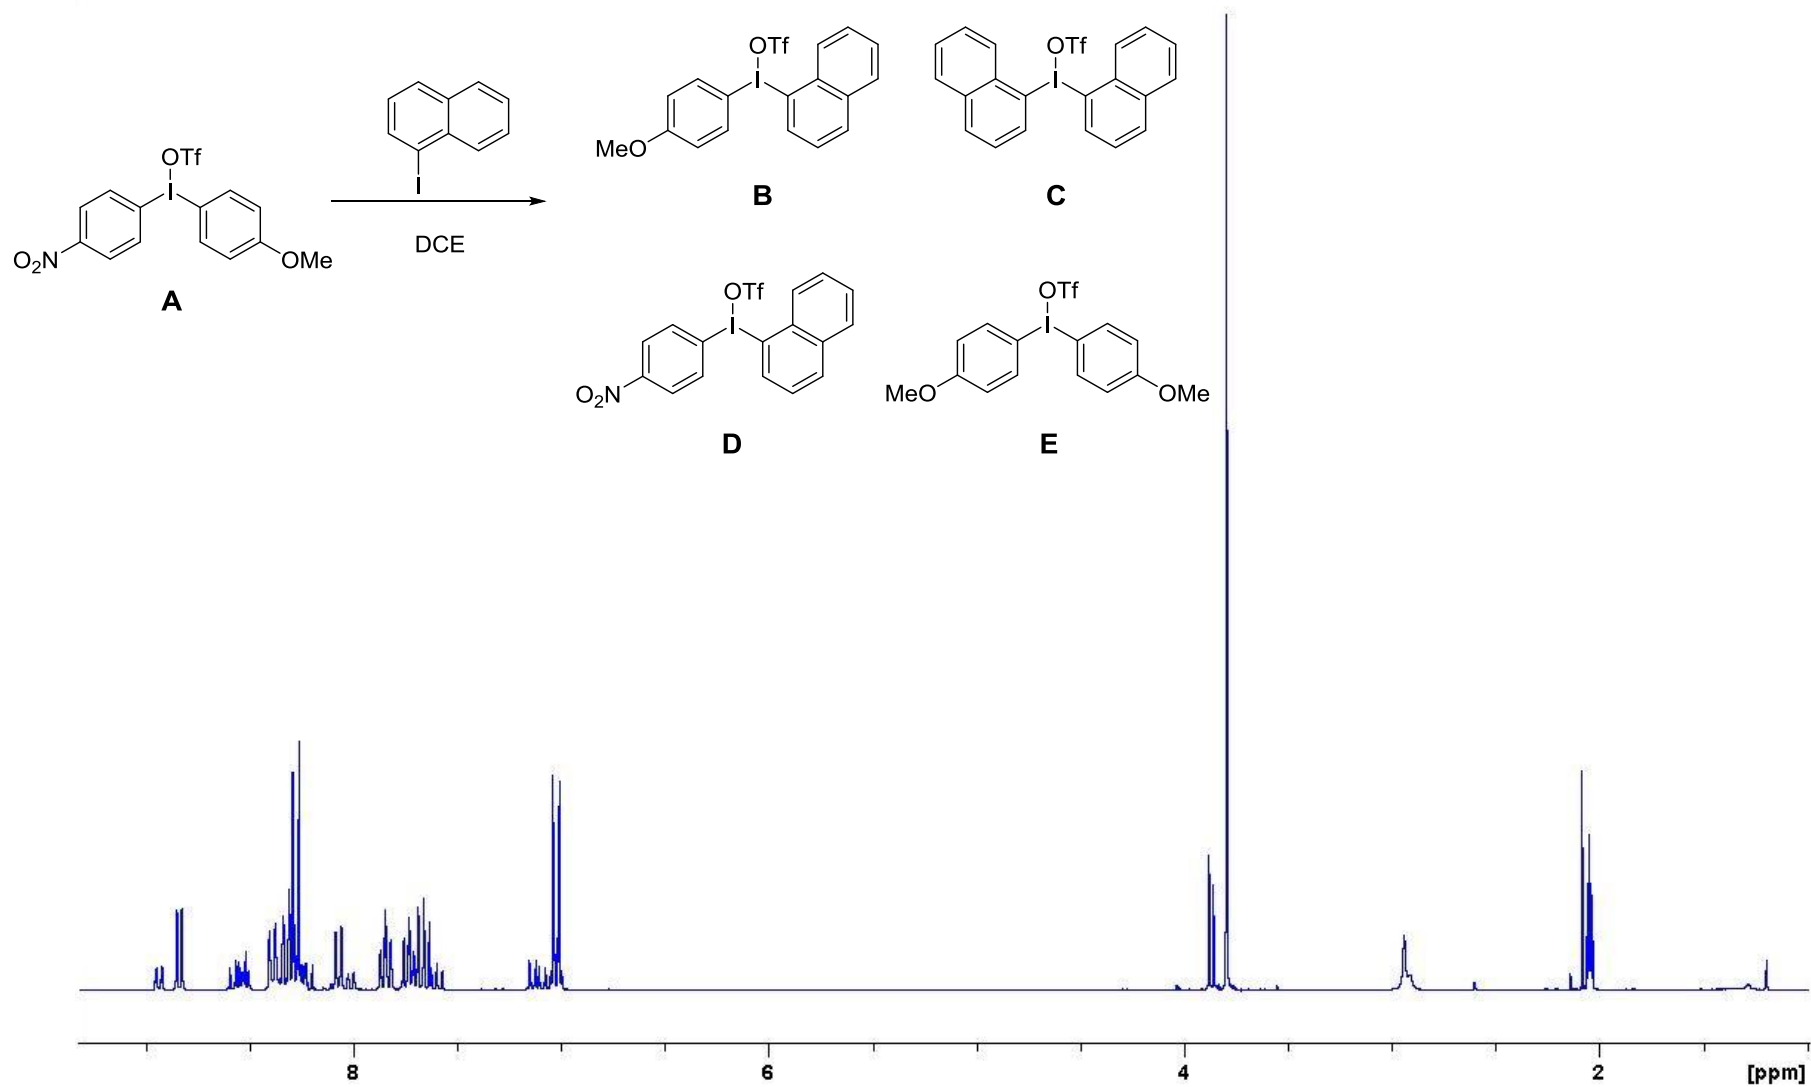

$^1\text{H}$  NMR spectrum of the product mixture obtained in entry h of Table 3 (acetone- $d_6$ )

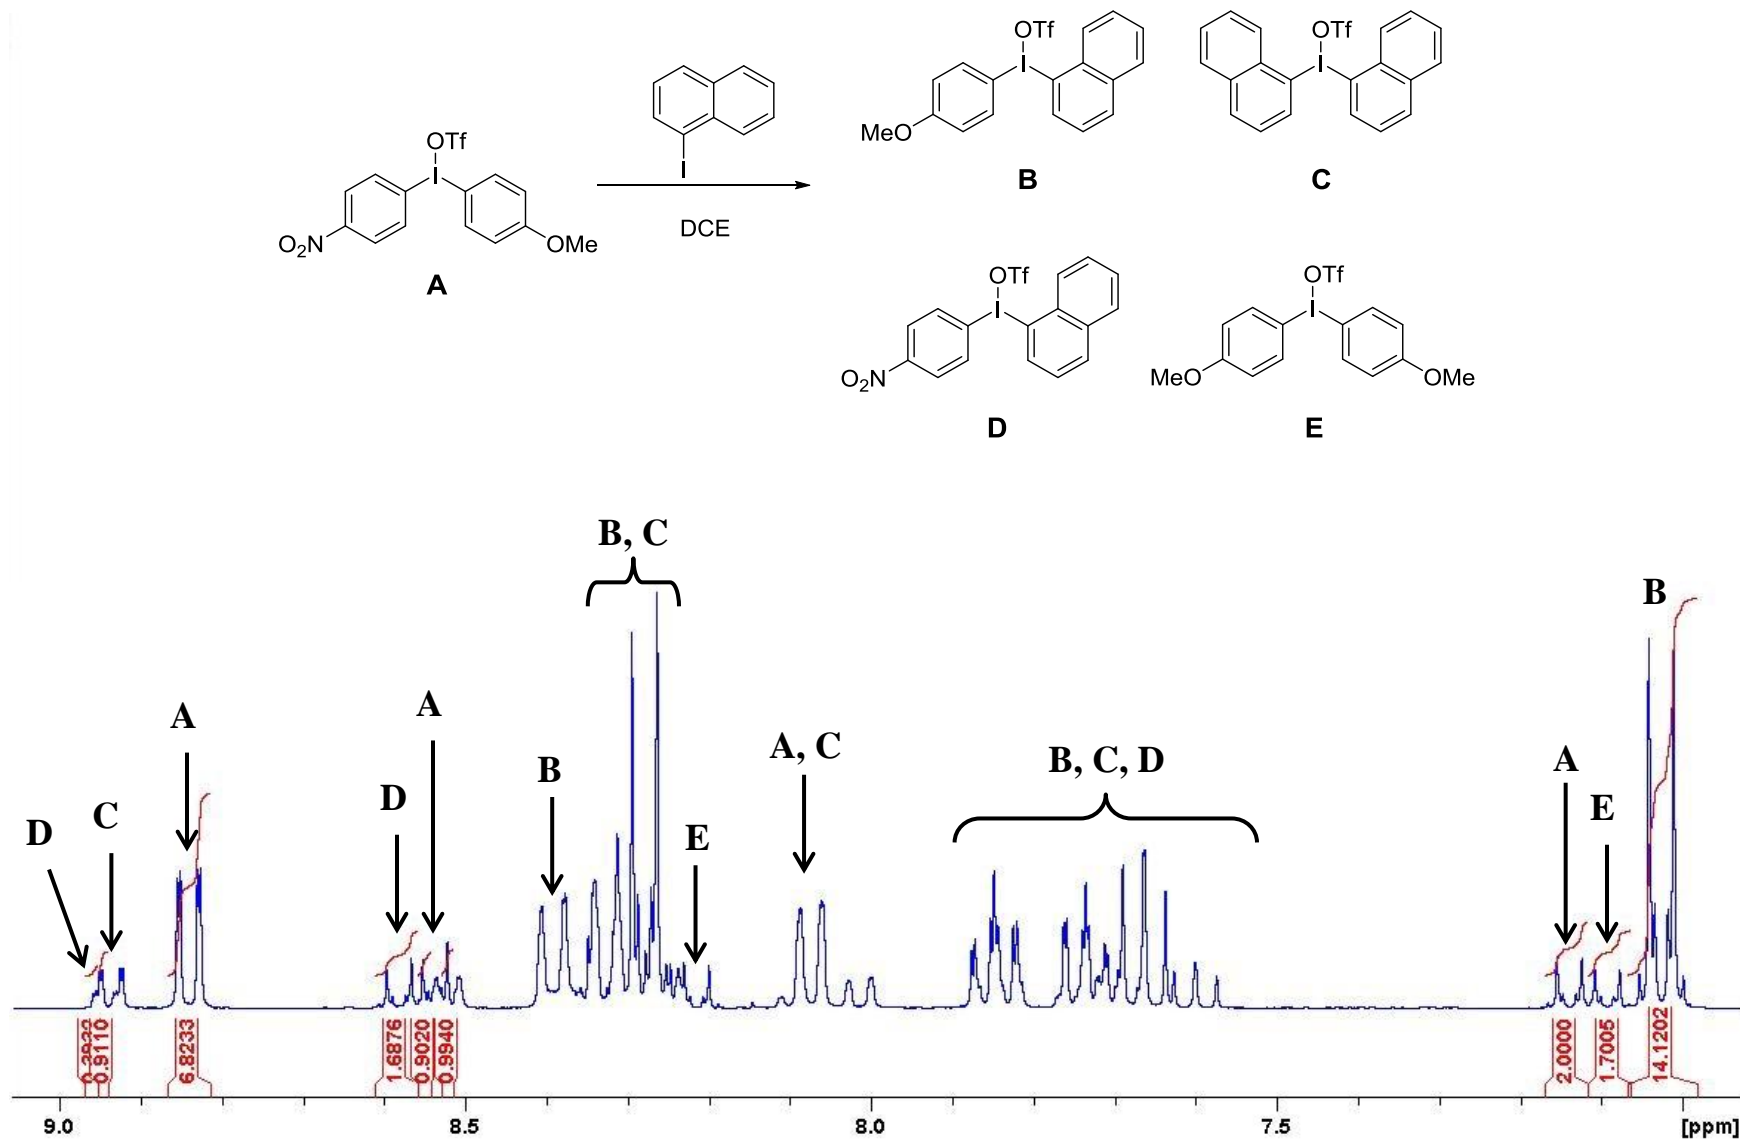Expanded  $^1\text{H}$  NMR spectrum of the product mixture obtained in entry h of Table 3 (acetone- $d_6$ )

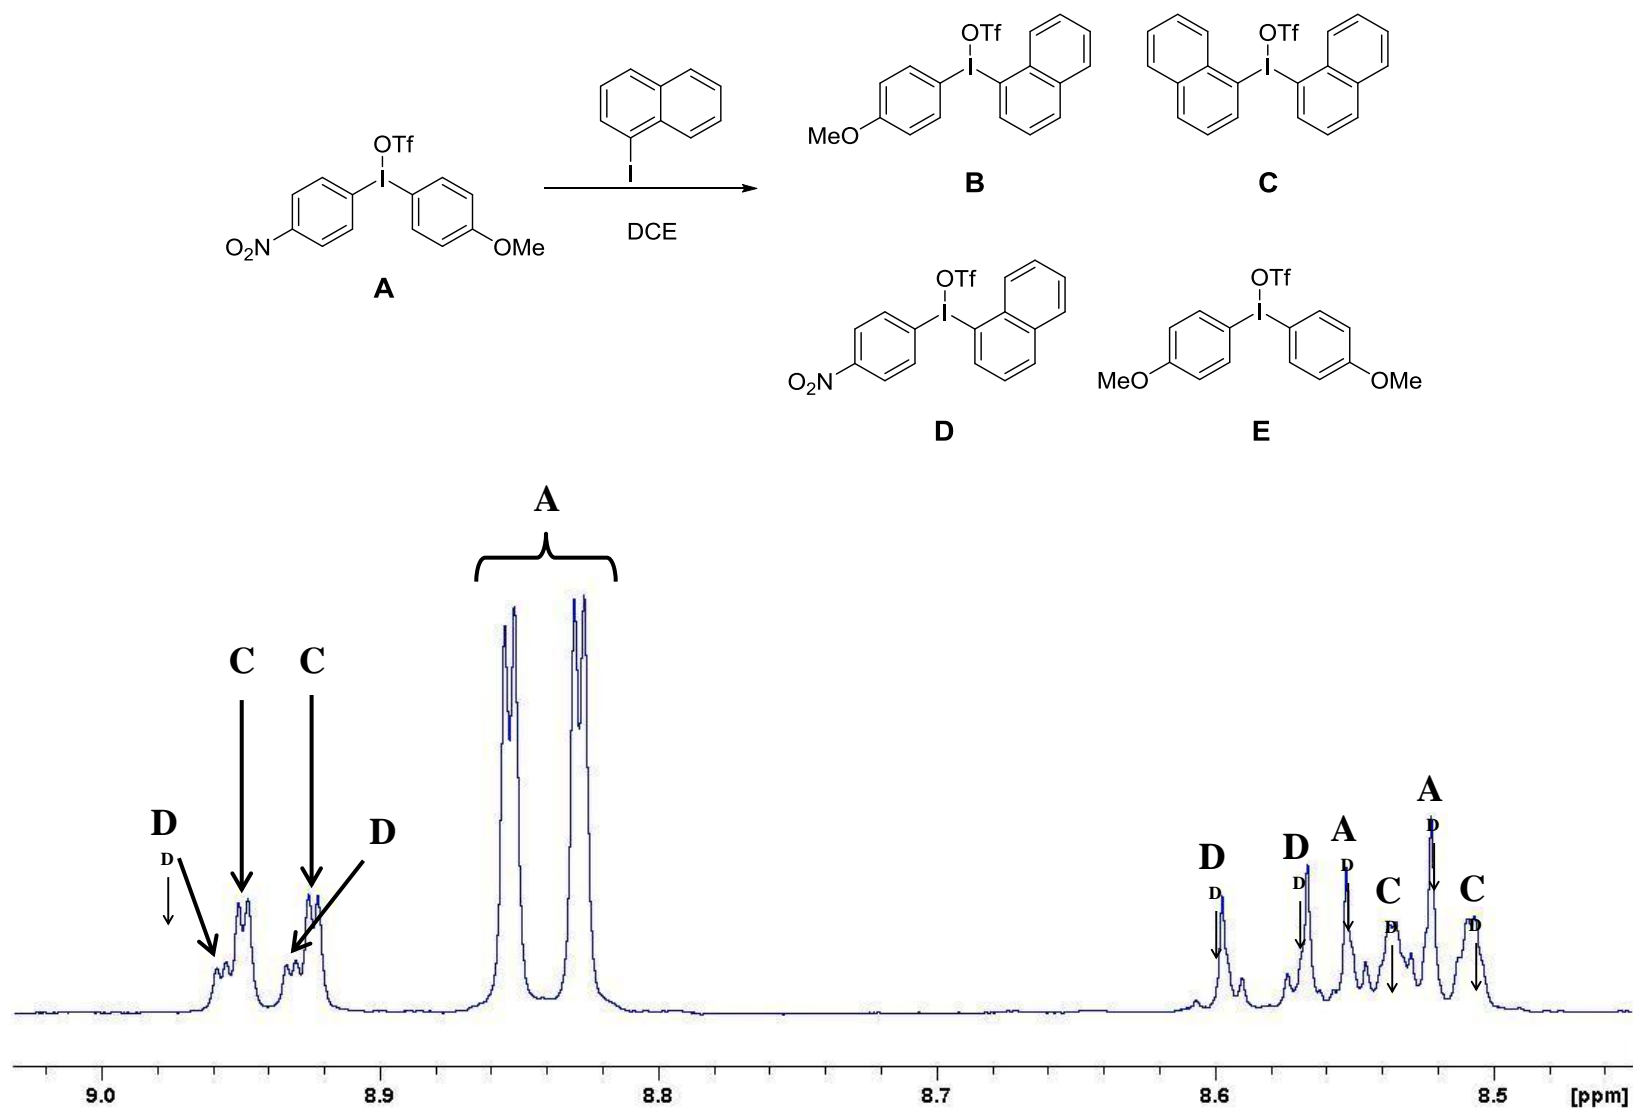Expanded  $^1\text{H}$  NMR spectrum of the product mixture obtained in entry h of Table 3 (acetone- $d_6$ )

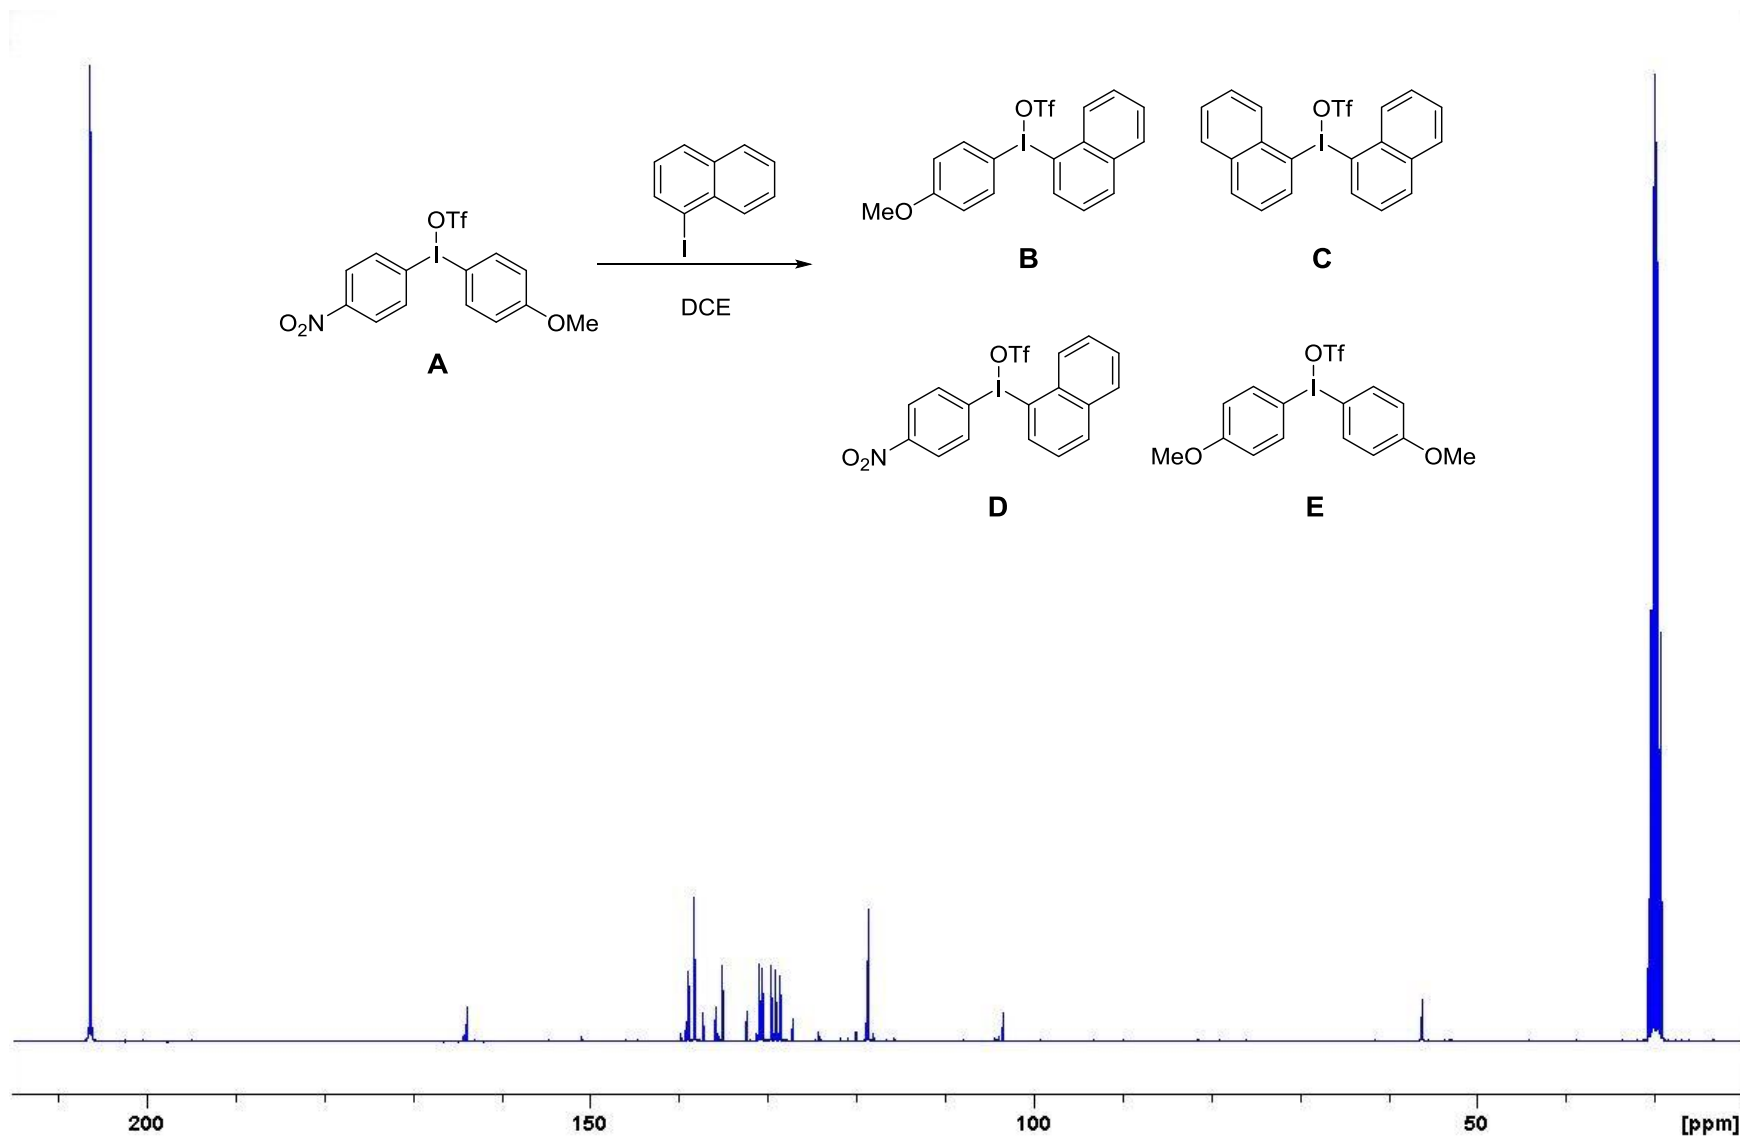

$^{13}\text{C}$  NMR spectrum of the product mixture obtained in entry h of Table 3 ( $\text{acetone-}d_6$ )

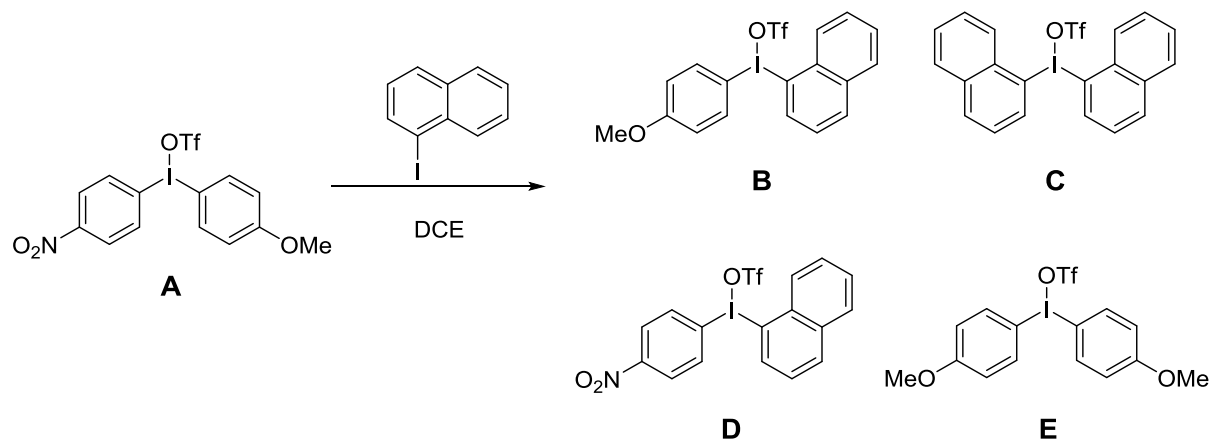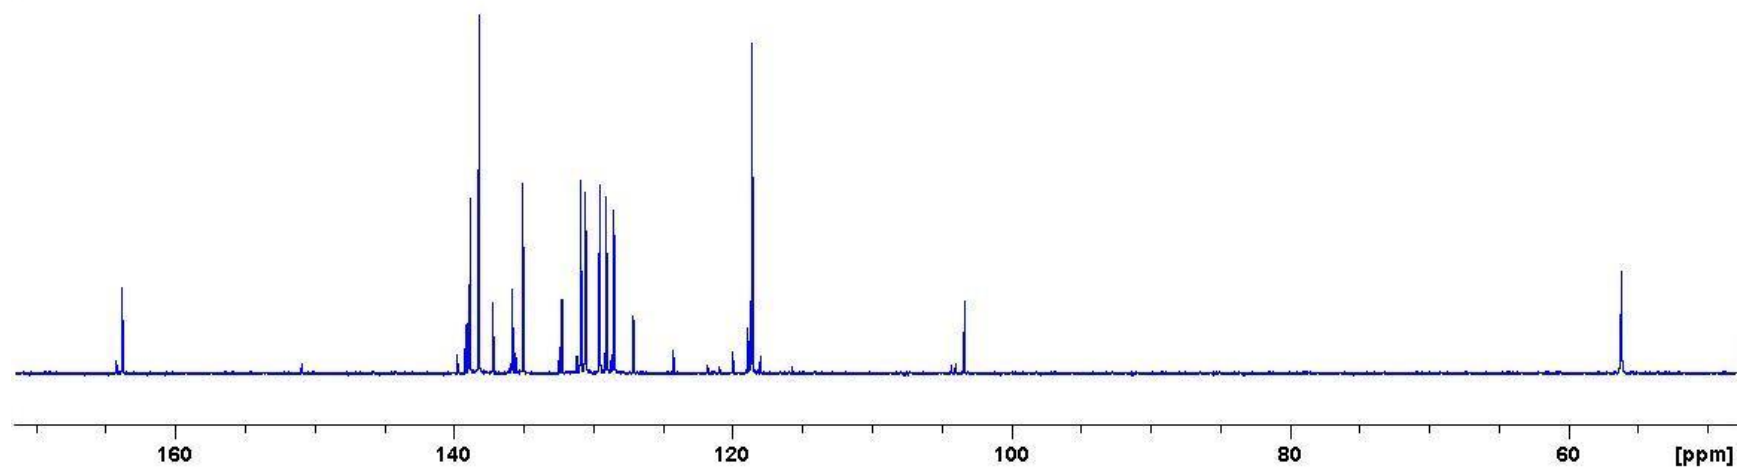

Expanded  $^{13}\text{C}$  NMR spectrum of the product mixture obtained in entry h of Table 3 (acetone- $d_6$ )



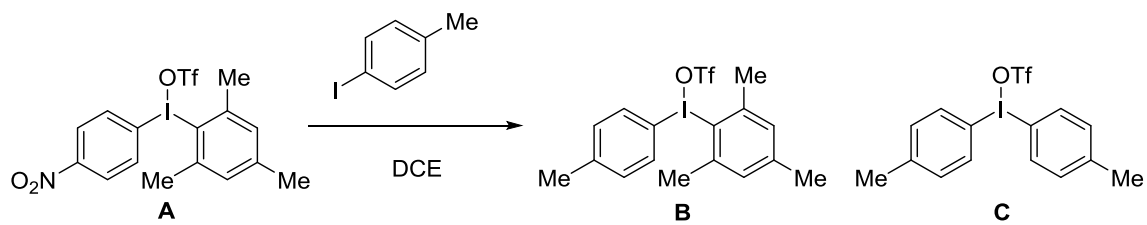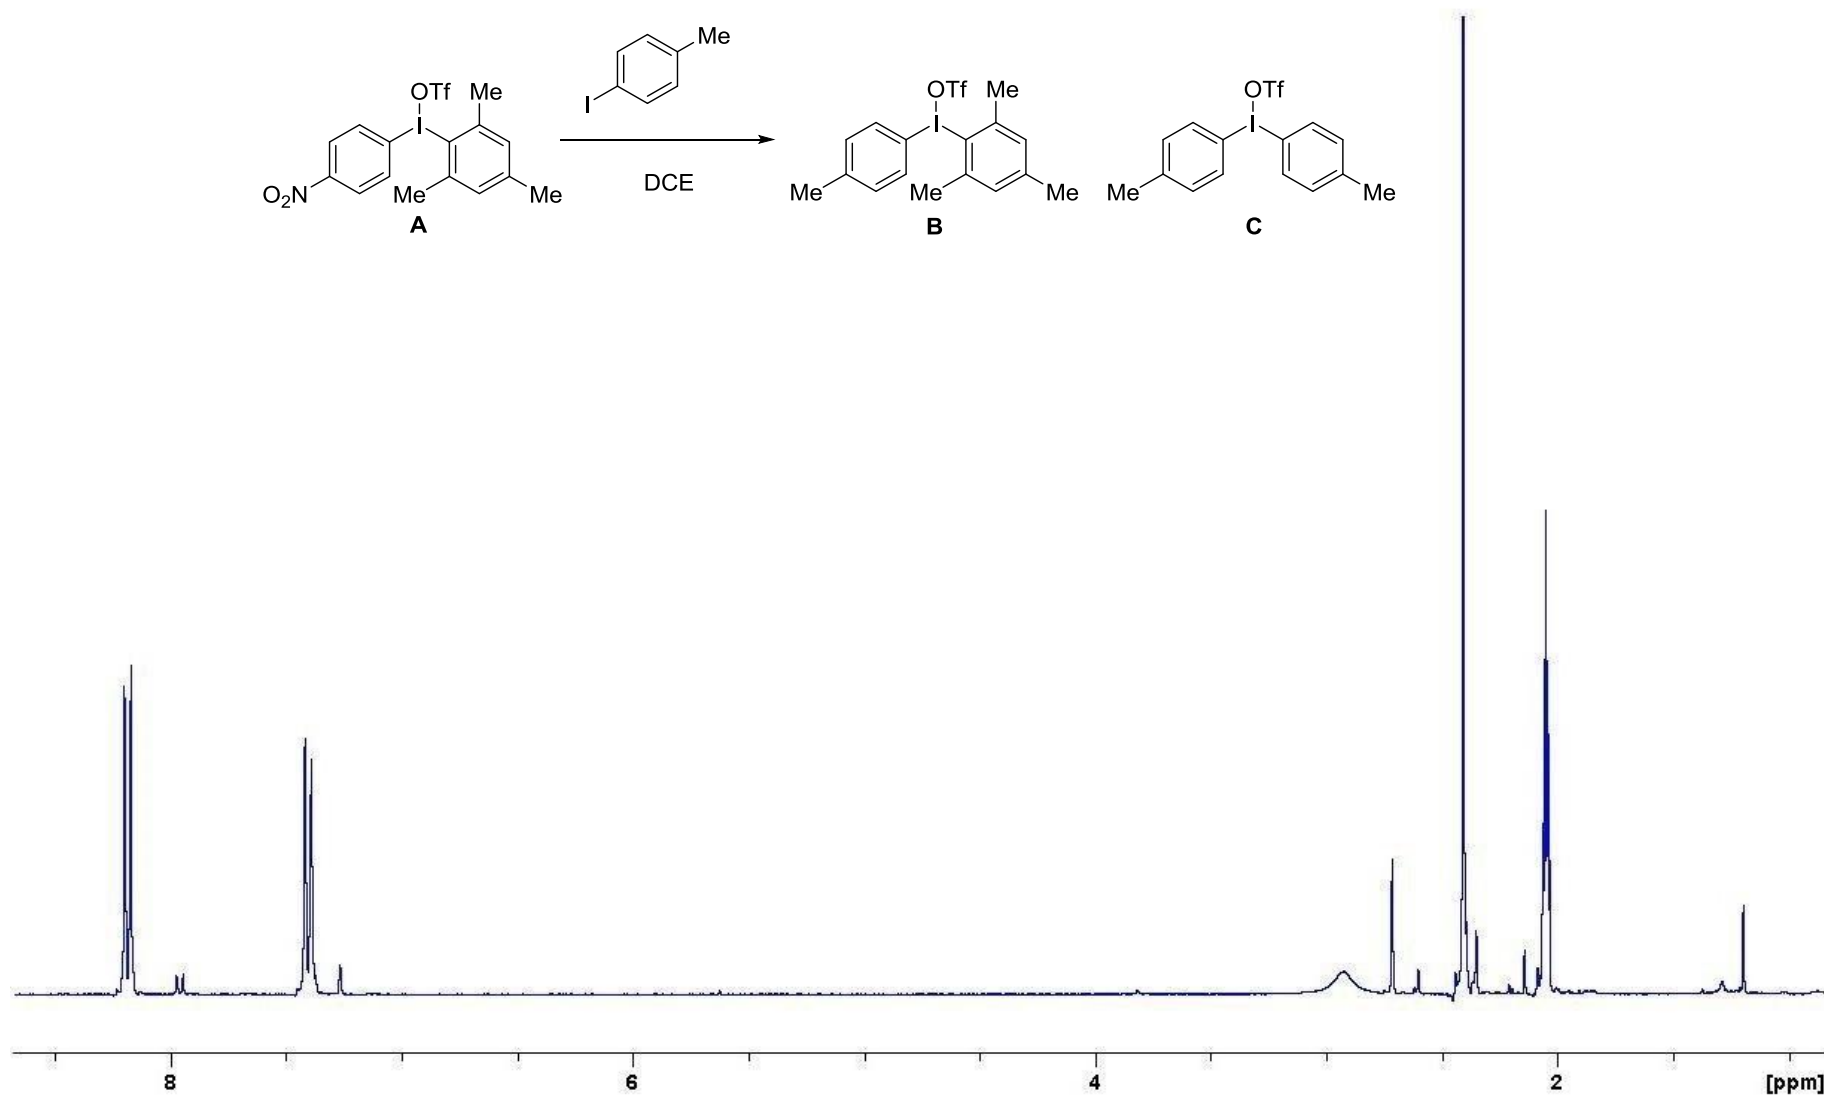

$^1\text{H}$  NMR spectrum of the product mixture obtained in entry i of Table 3 ( $\text{acetone-}d_6$ )

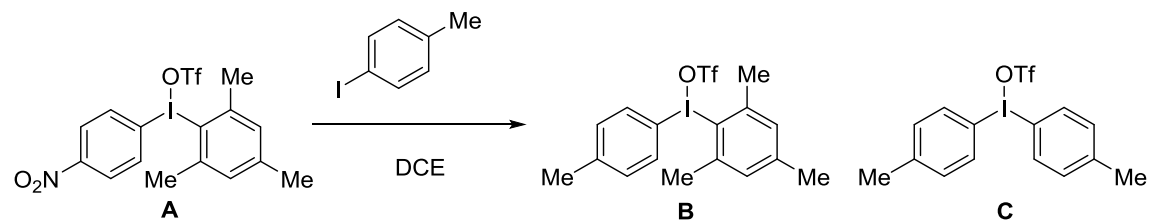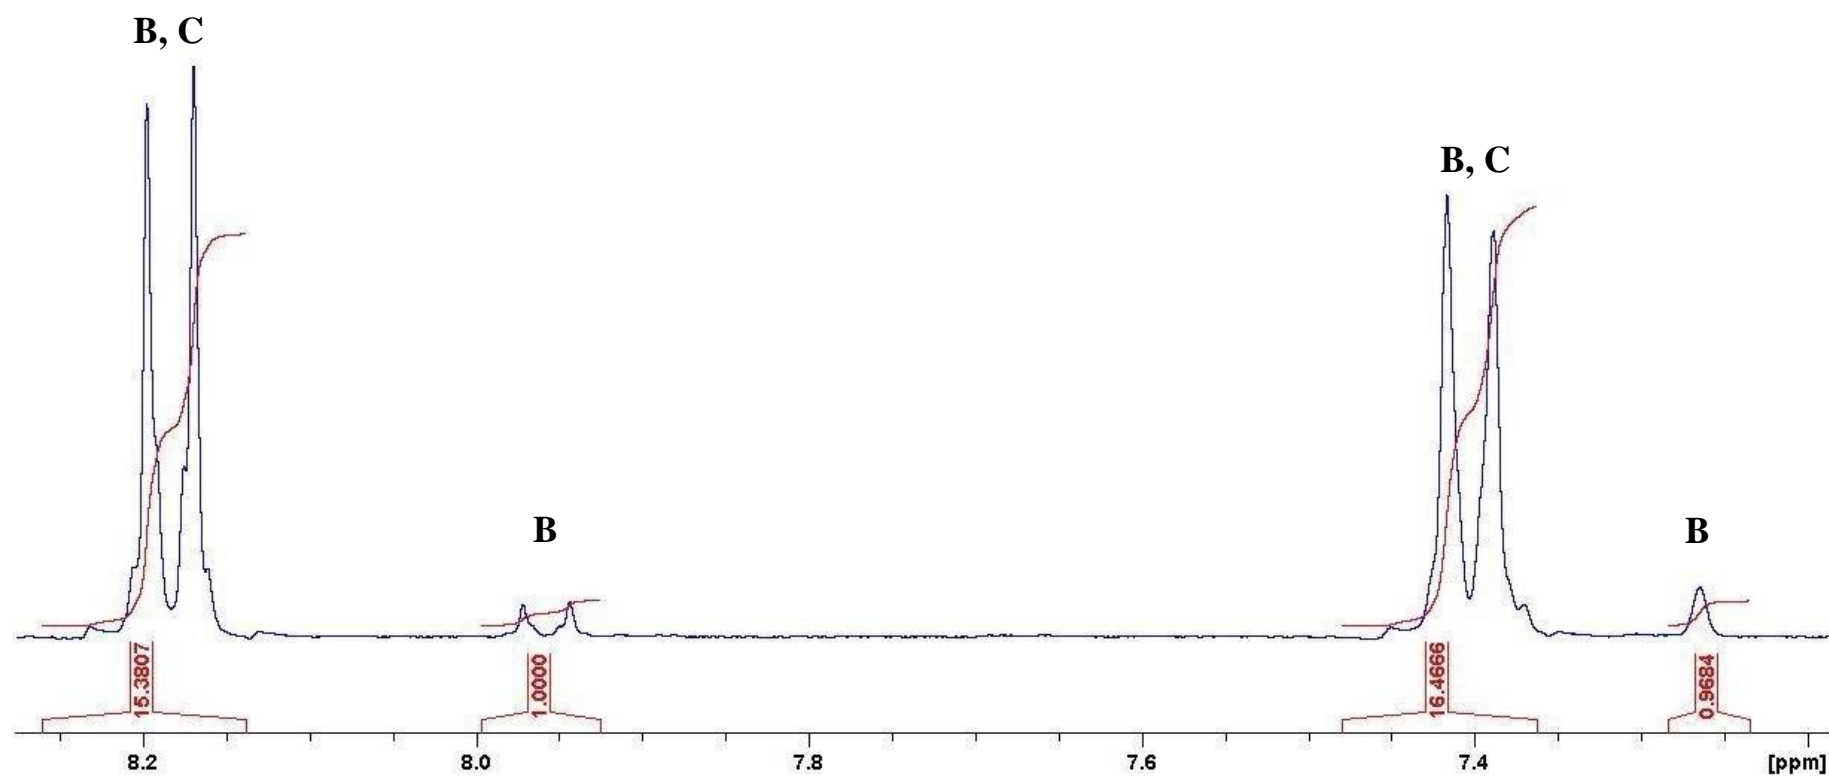

Expanded  $^1\text{H}$  NMR spectrum of the product mixture obtained in entry i of Table 3 ( $\text{acetone-}d_6$ )

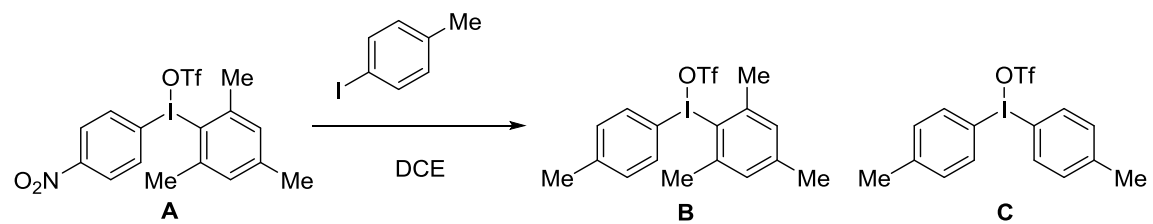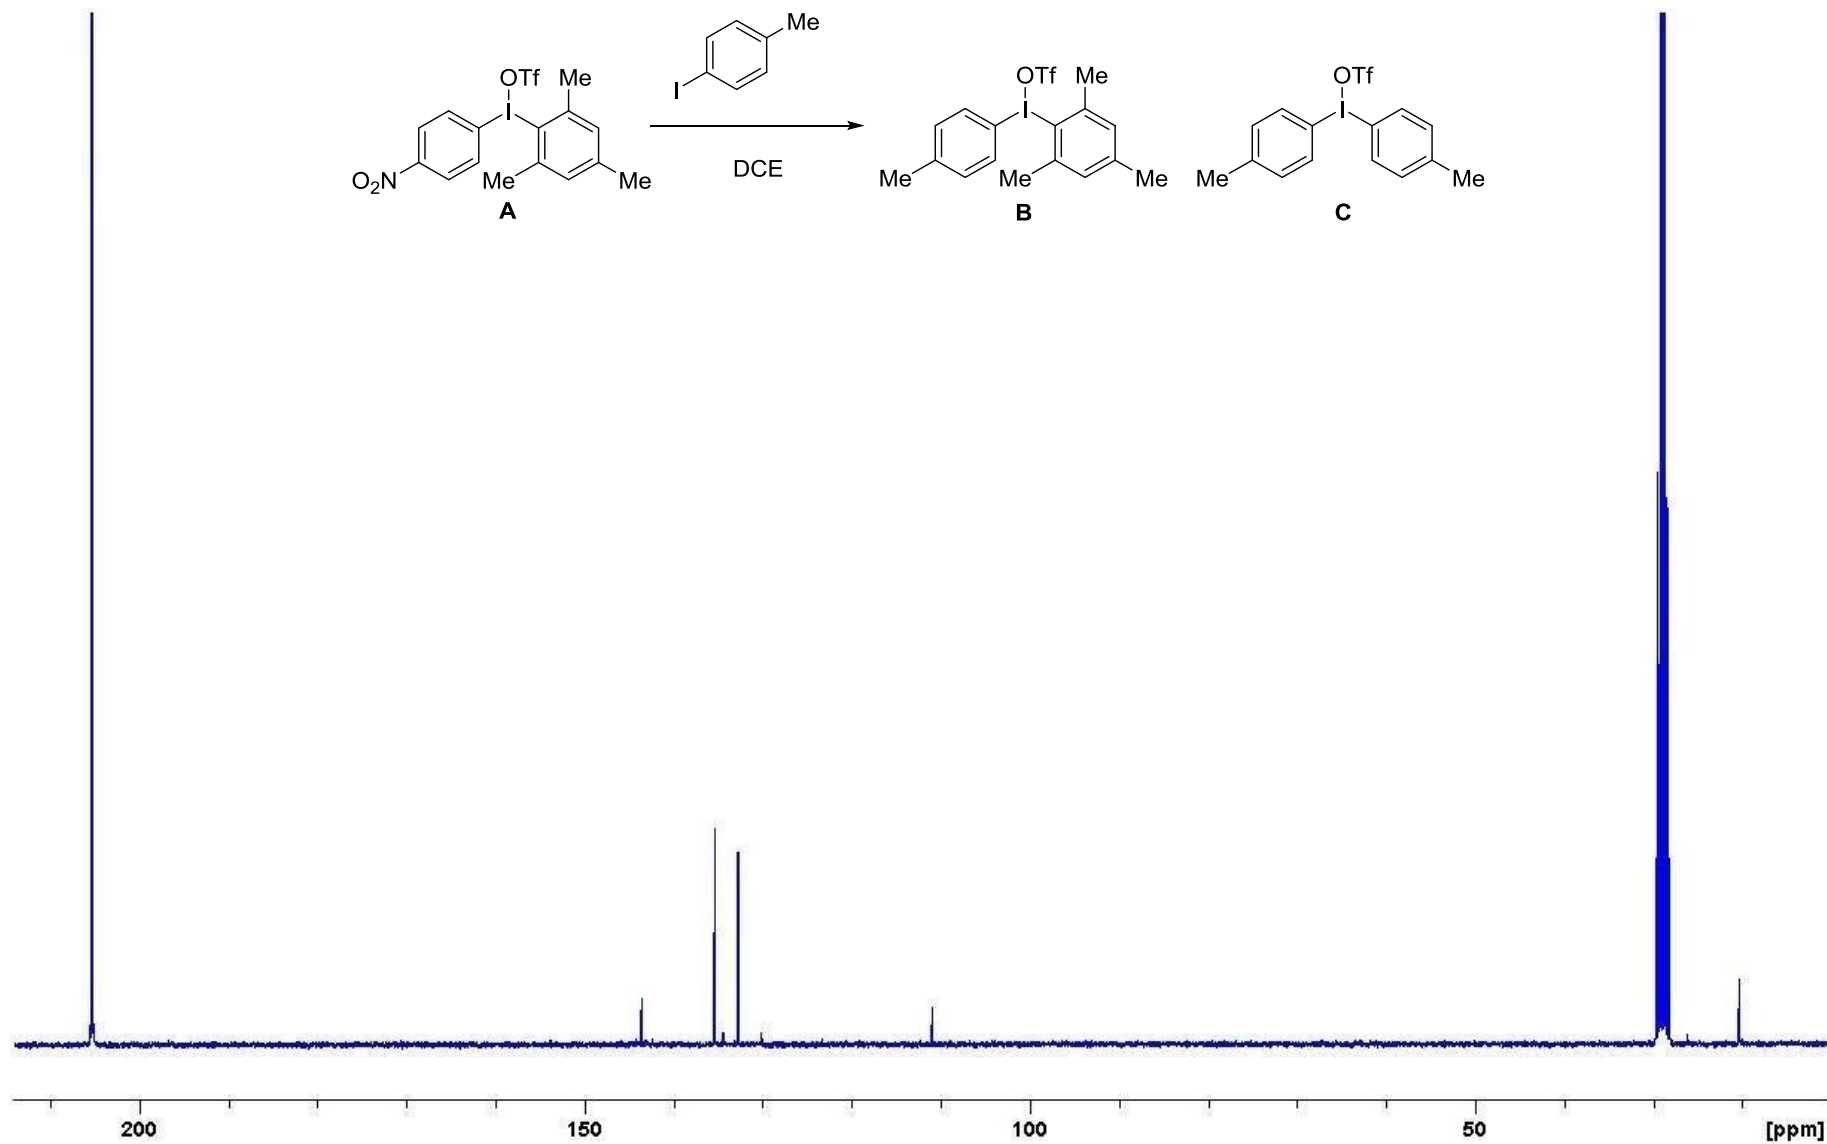

$^{13}\text{C}$  NMR spectrum of the product mixture obtained in entry i of Table 3 (acetone- $d_6$ )

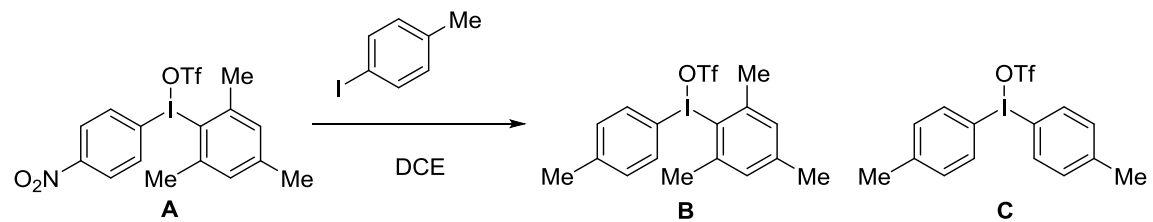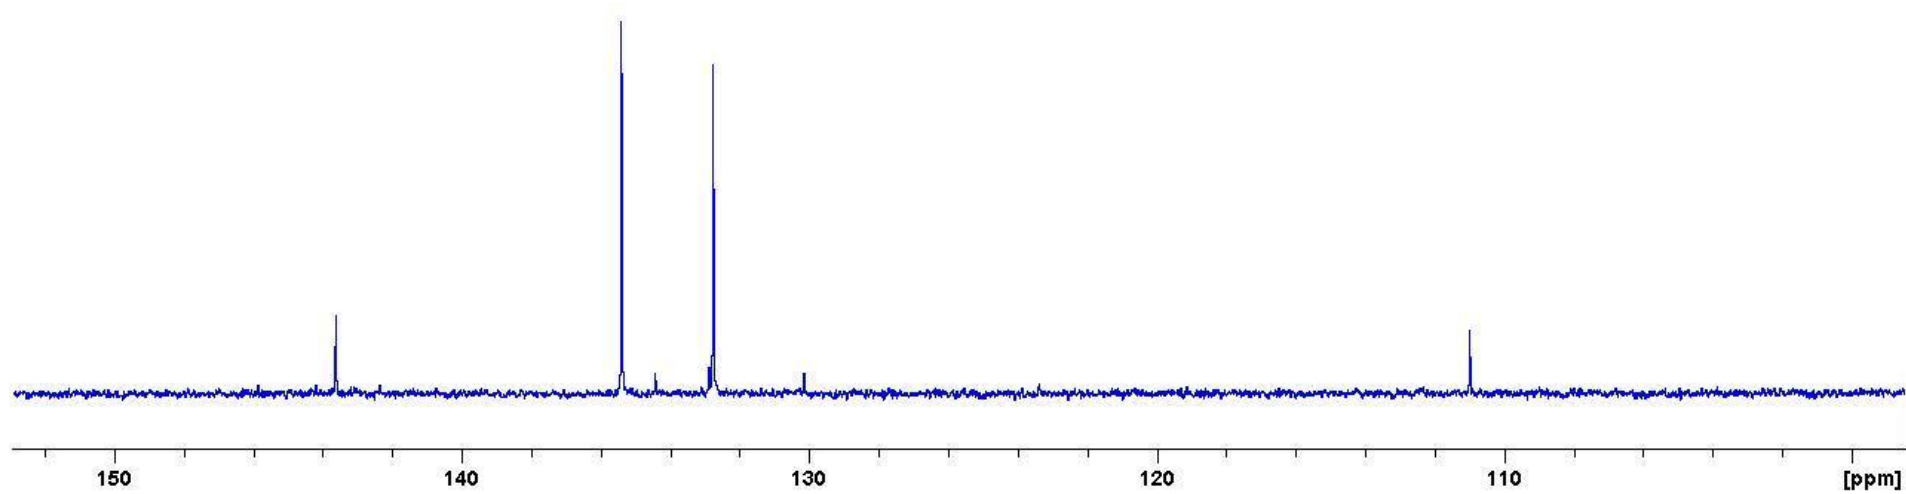

Expanded  $^{13}\text{C}$  NMR spectrum of the product mixture obtained in entry i of Table 3 (acetone- $d_6$ )

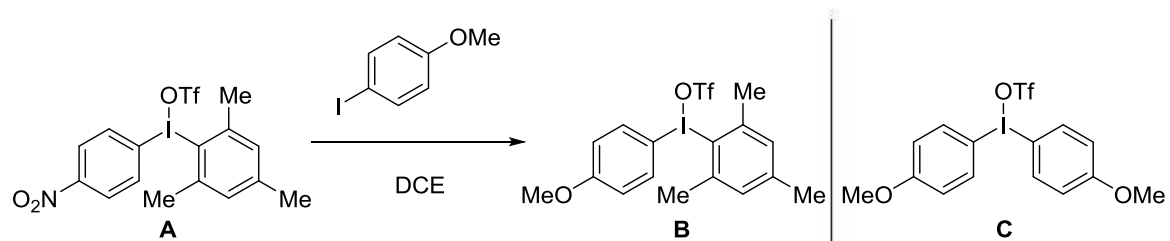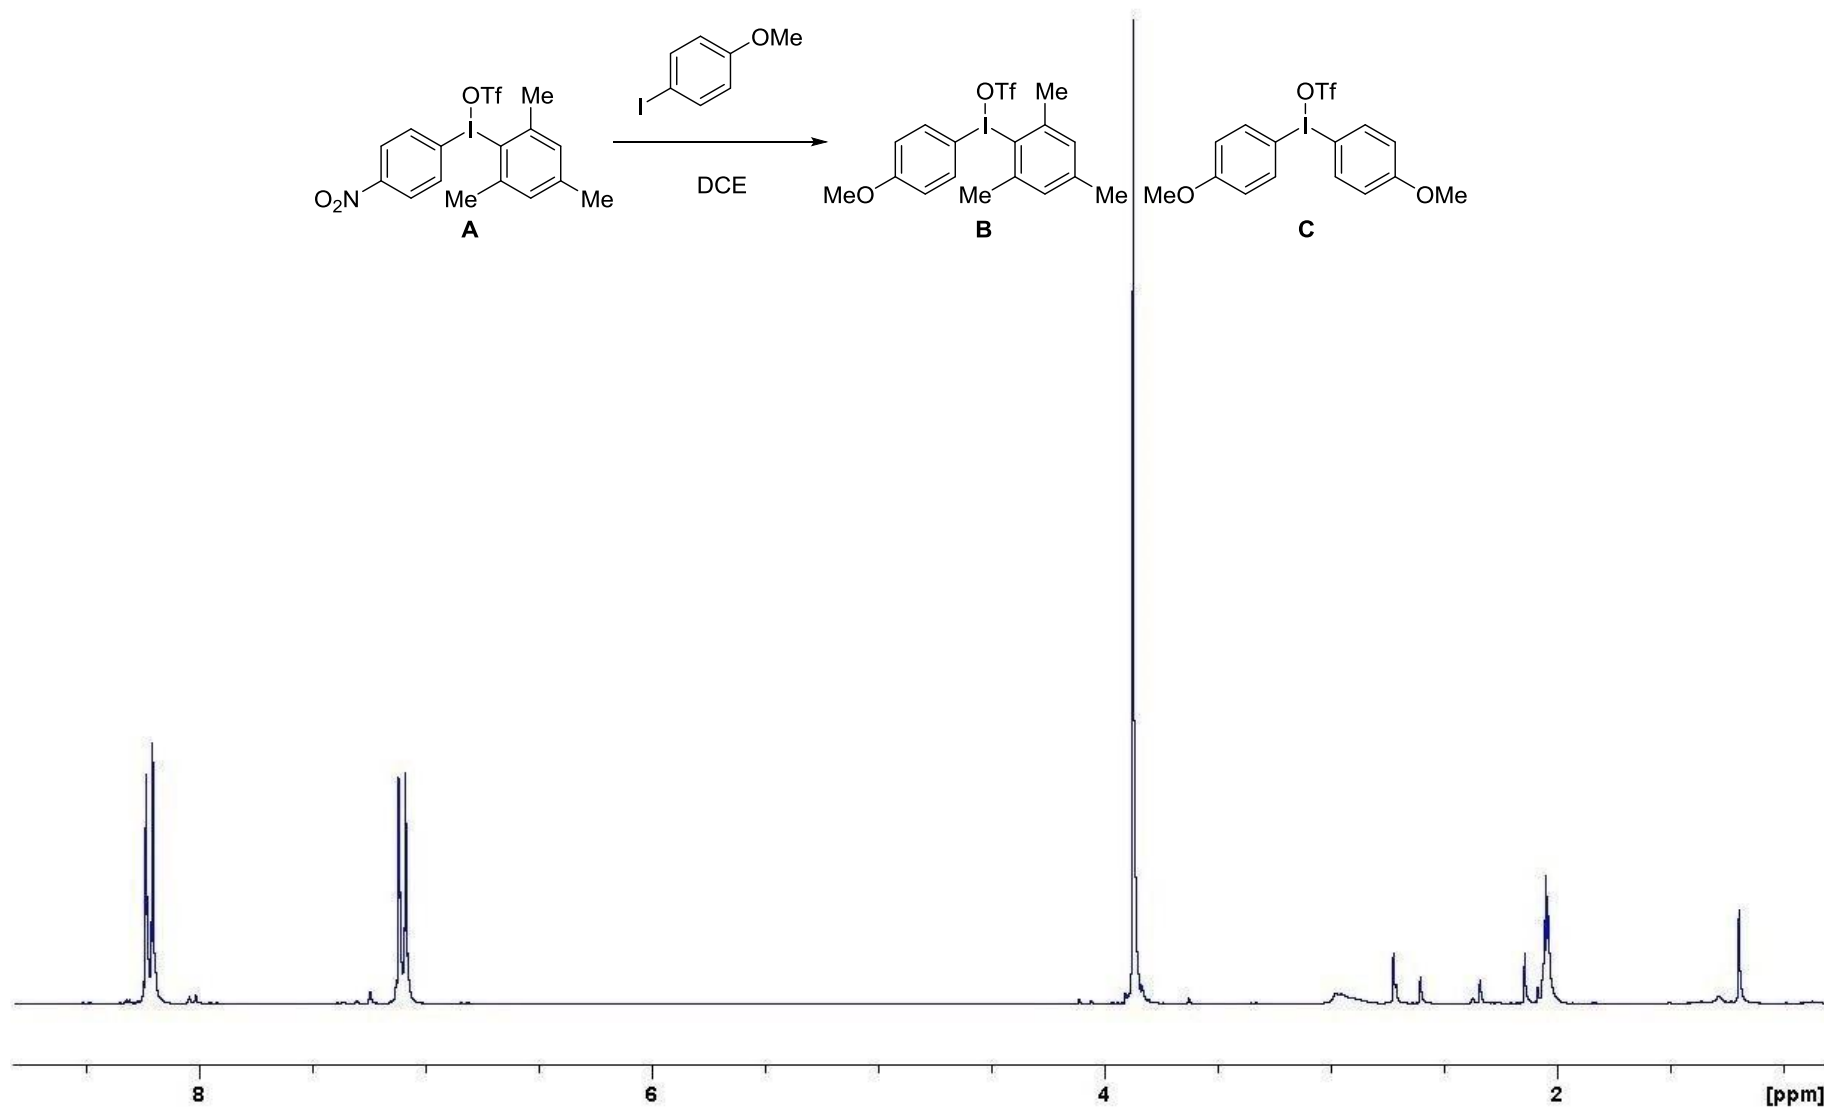

$^1\text{H}$  NMR spectrum of the product mixture obtained in entry j of Table 3 (acetone- $d_6$ )

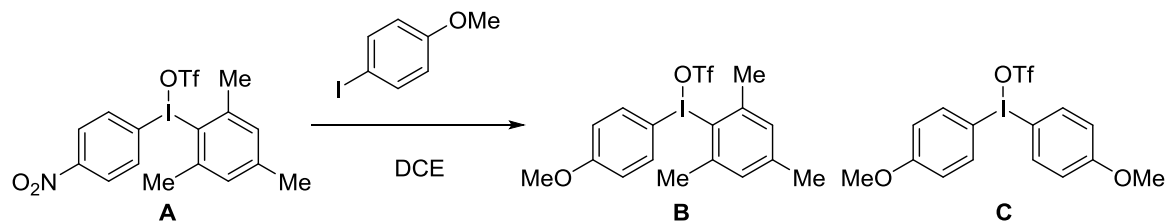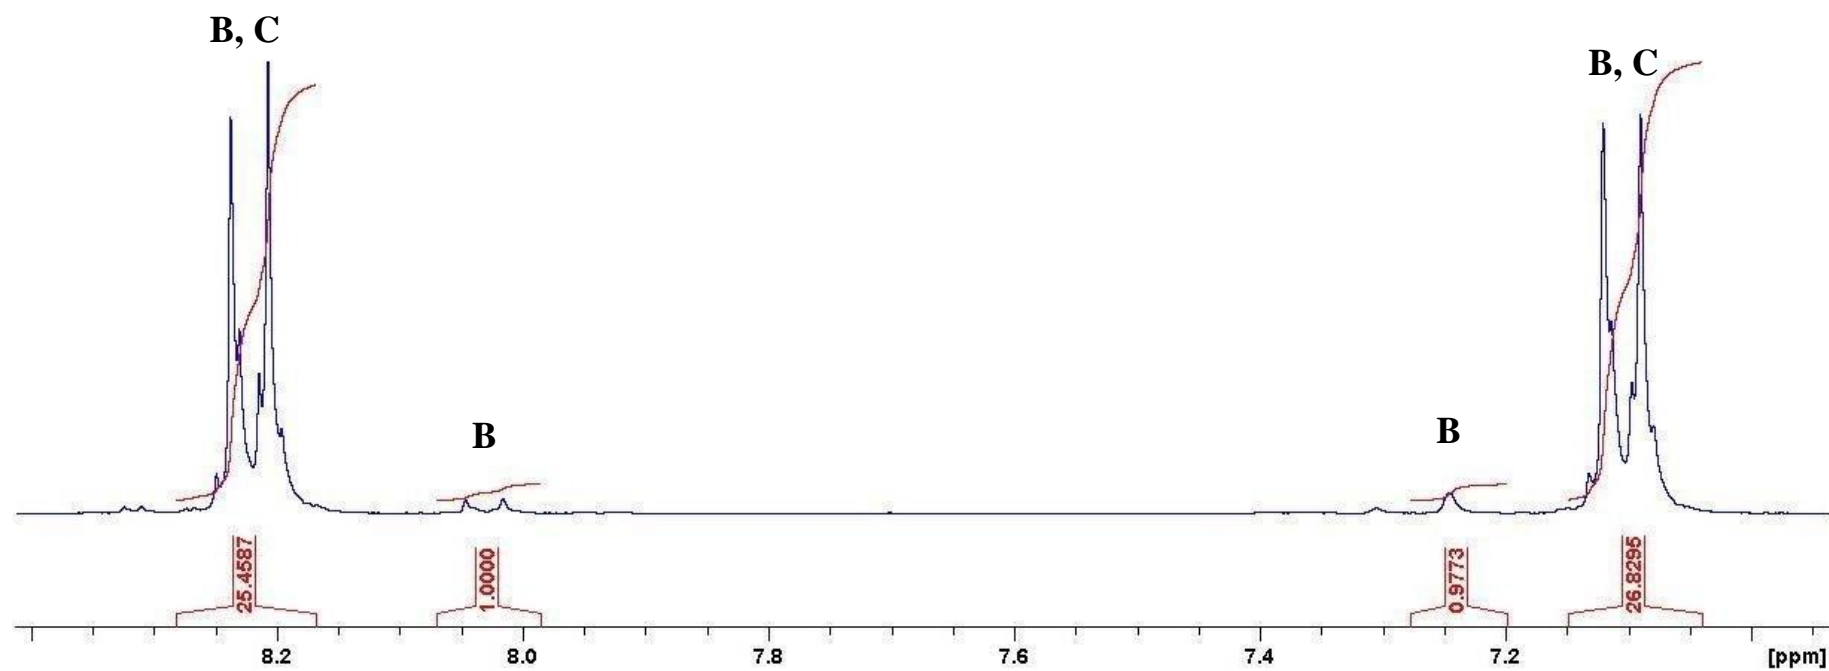

Expanded  $^1\text{H}$  NMR spectrum of the product mixture obtained in entry j of Table 3 ( $\text{acetone-}d_6$ )

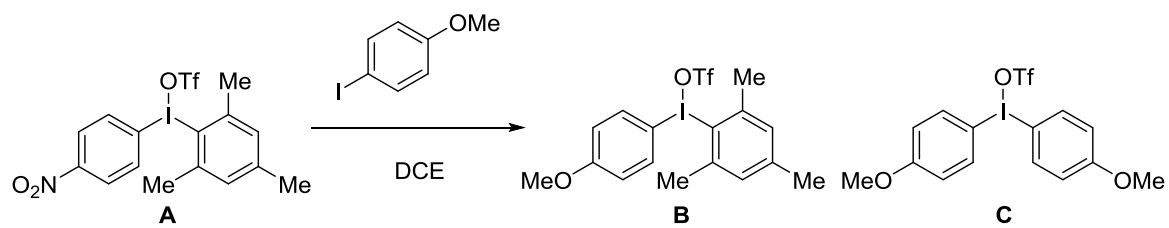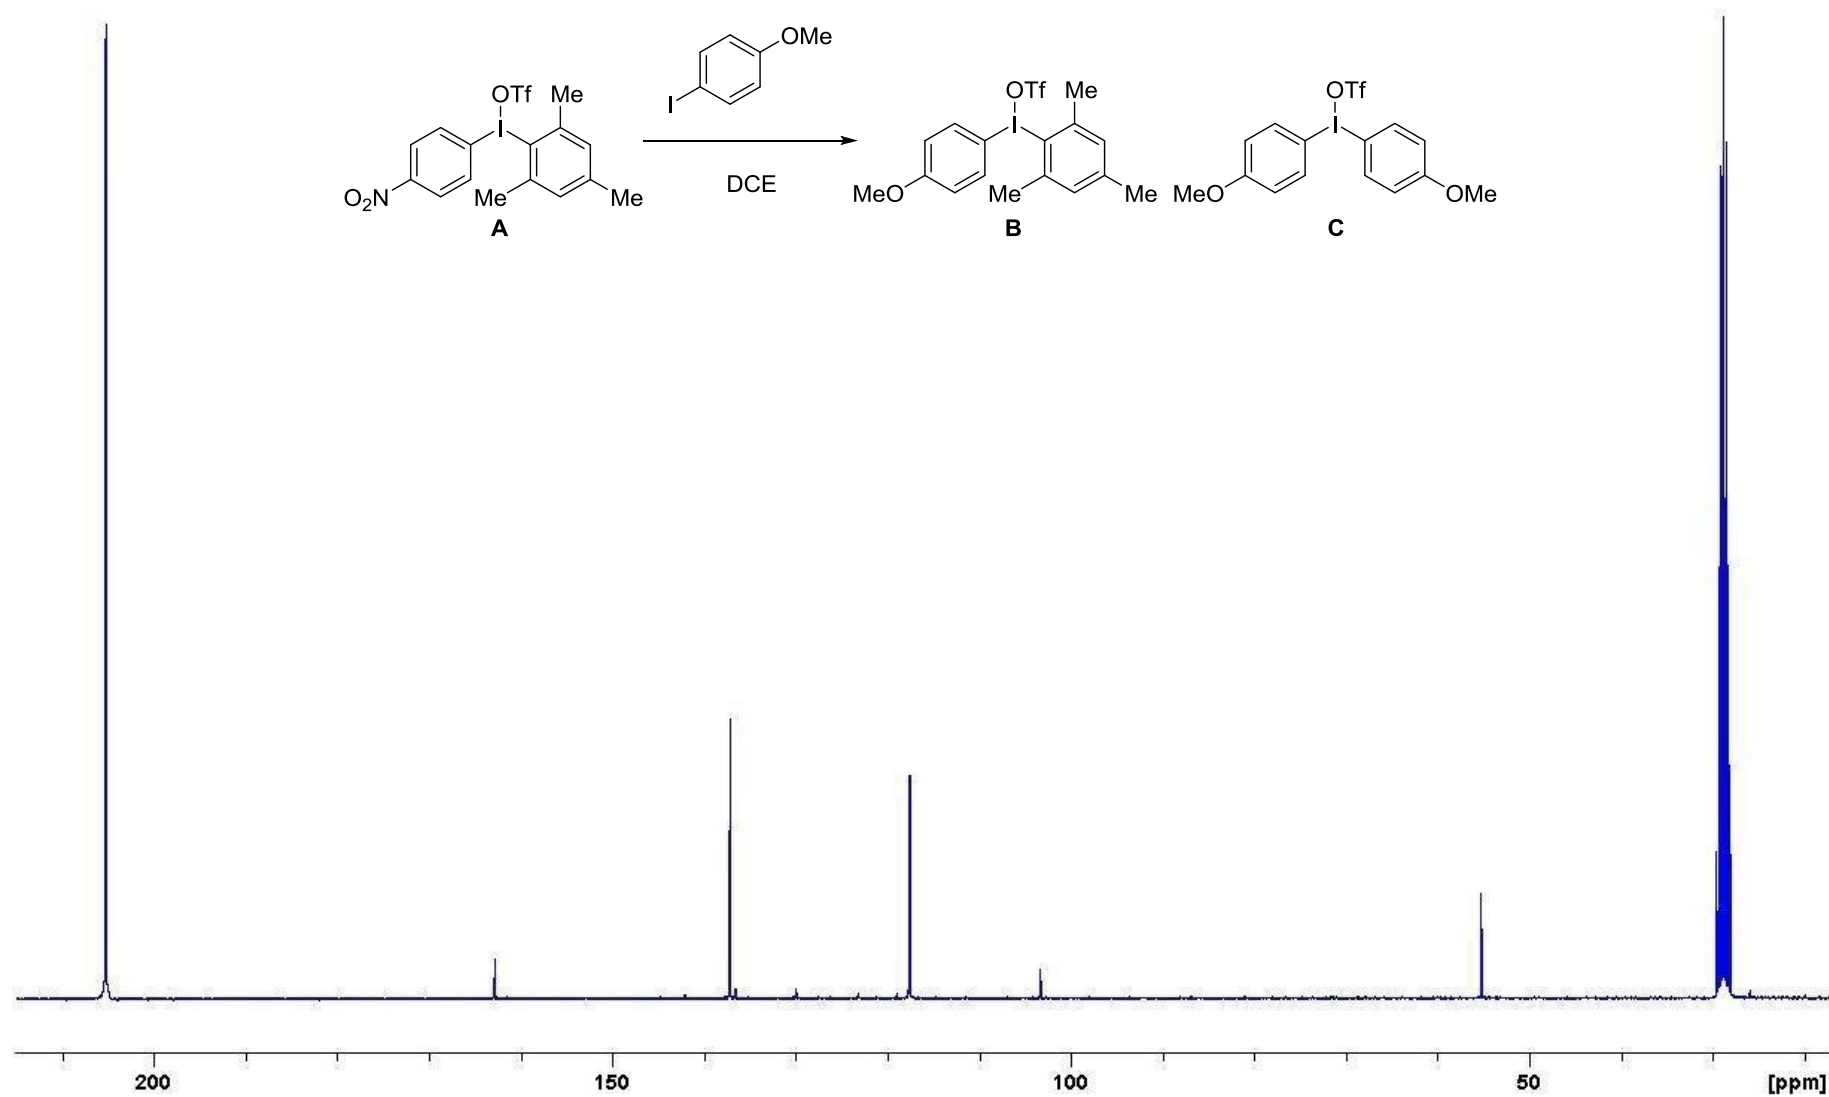

$^{13}\text{C}$  NMR spectrum of the product mixture obtained in entry j of Table 3 ( $\text{acetone-}d_6$ )

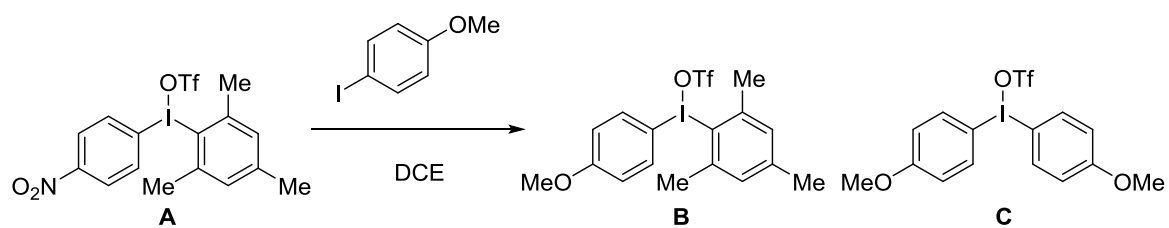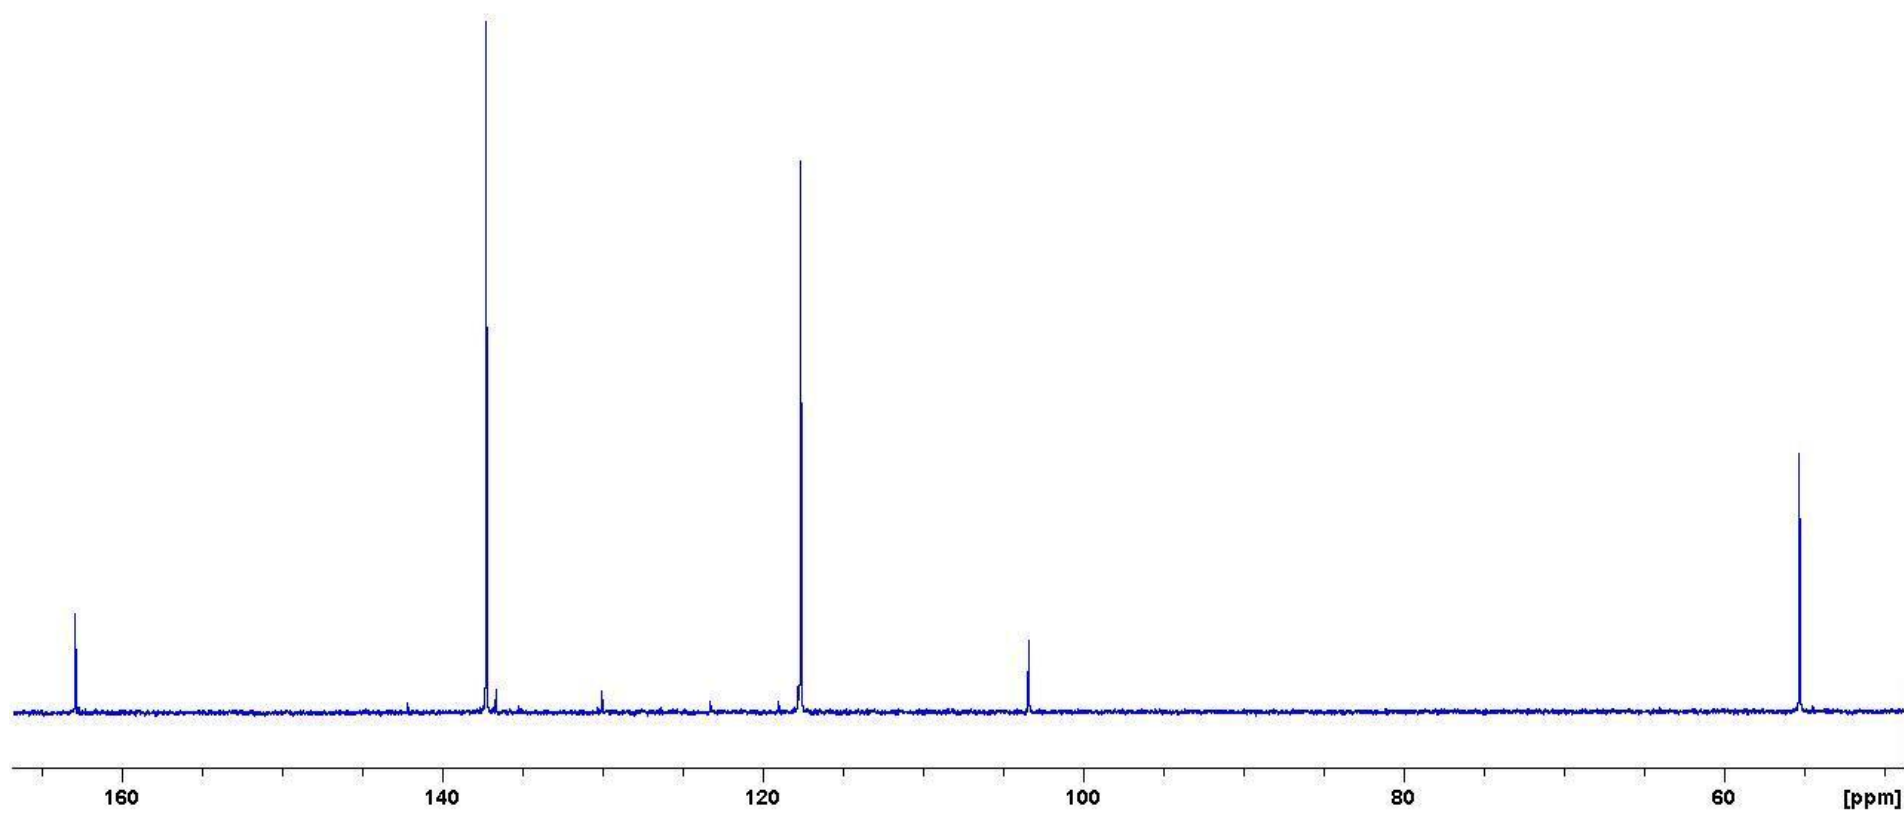

Expanded  $^{13}\text{C}$  NMR spectrum of the product mixture obtained in entry j of Table 3 (acetone- $d_6$ )



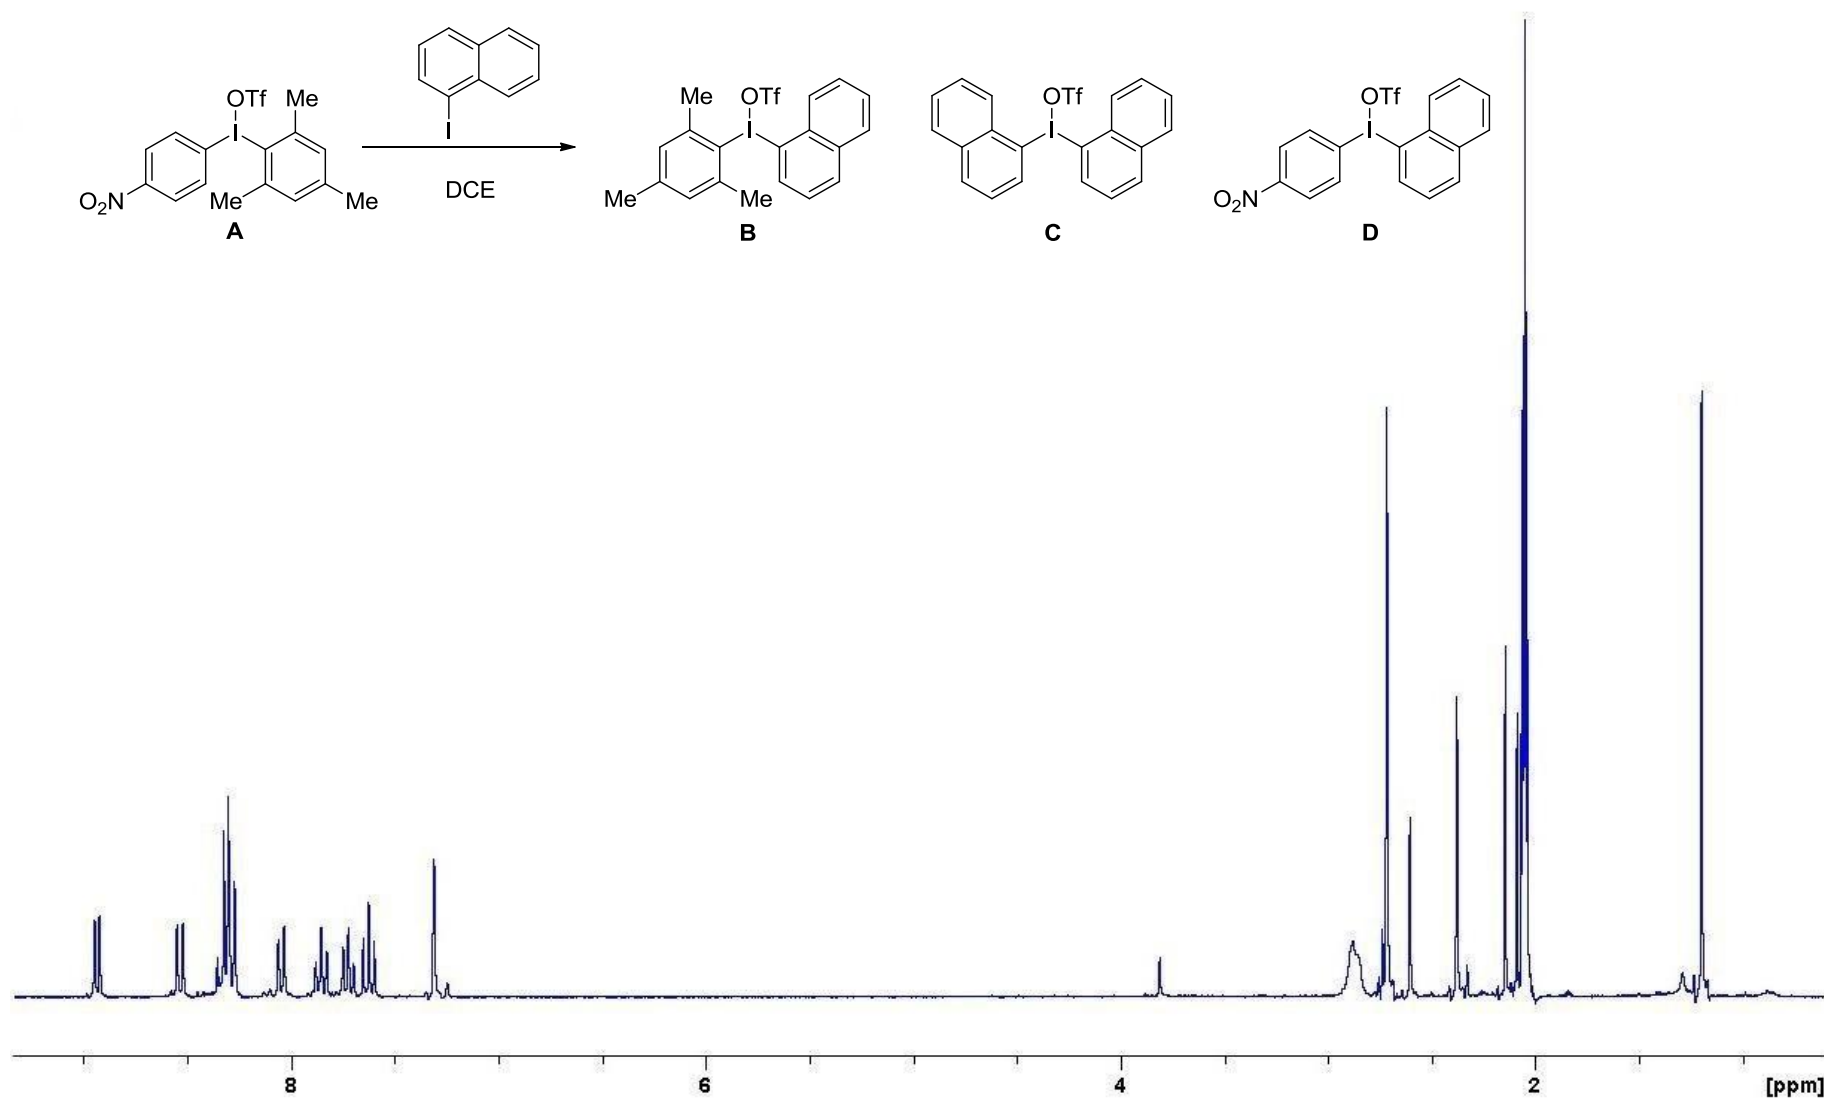

$^1\text{H}$  NMR spectrum of the product mixture obtained in entry k of Table 3 (acetone- $d_6$ )

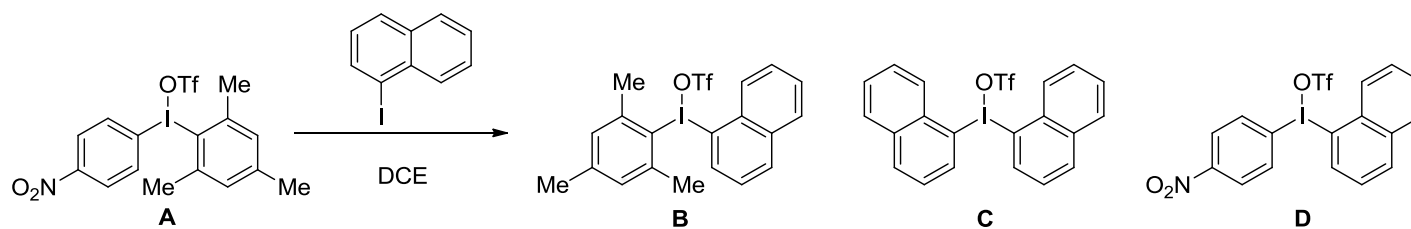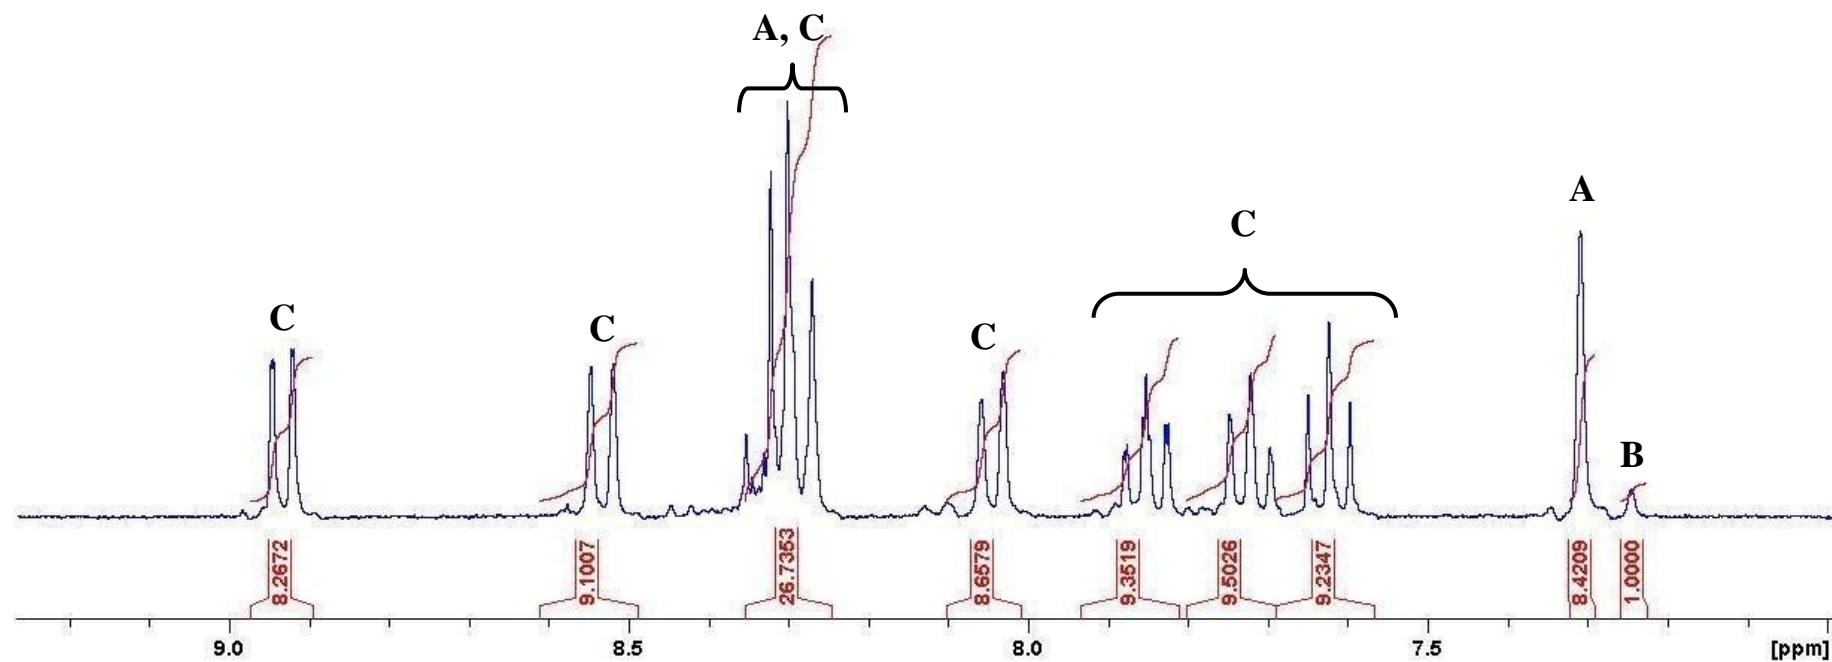

Expanded  $^1\text{H}$  NMR spectrum of the product mixture obtained in entry k of Table 3 (acetone- $d_6$ )

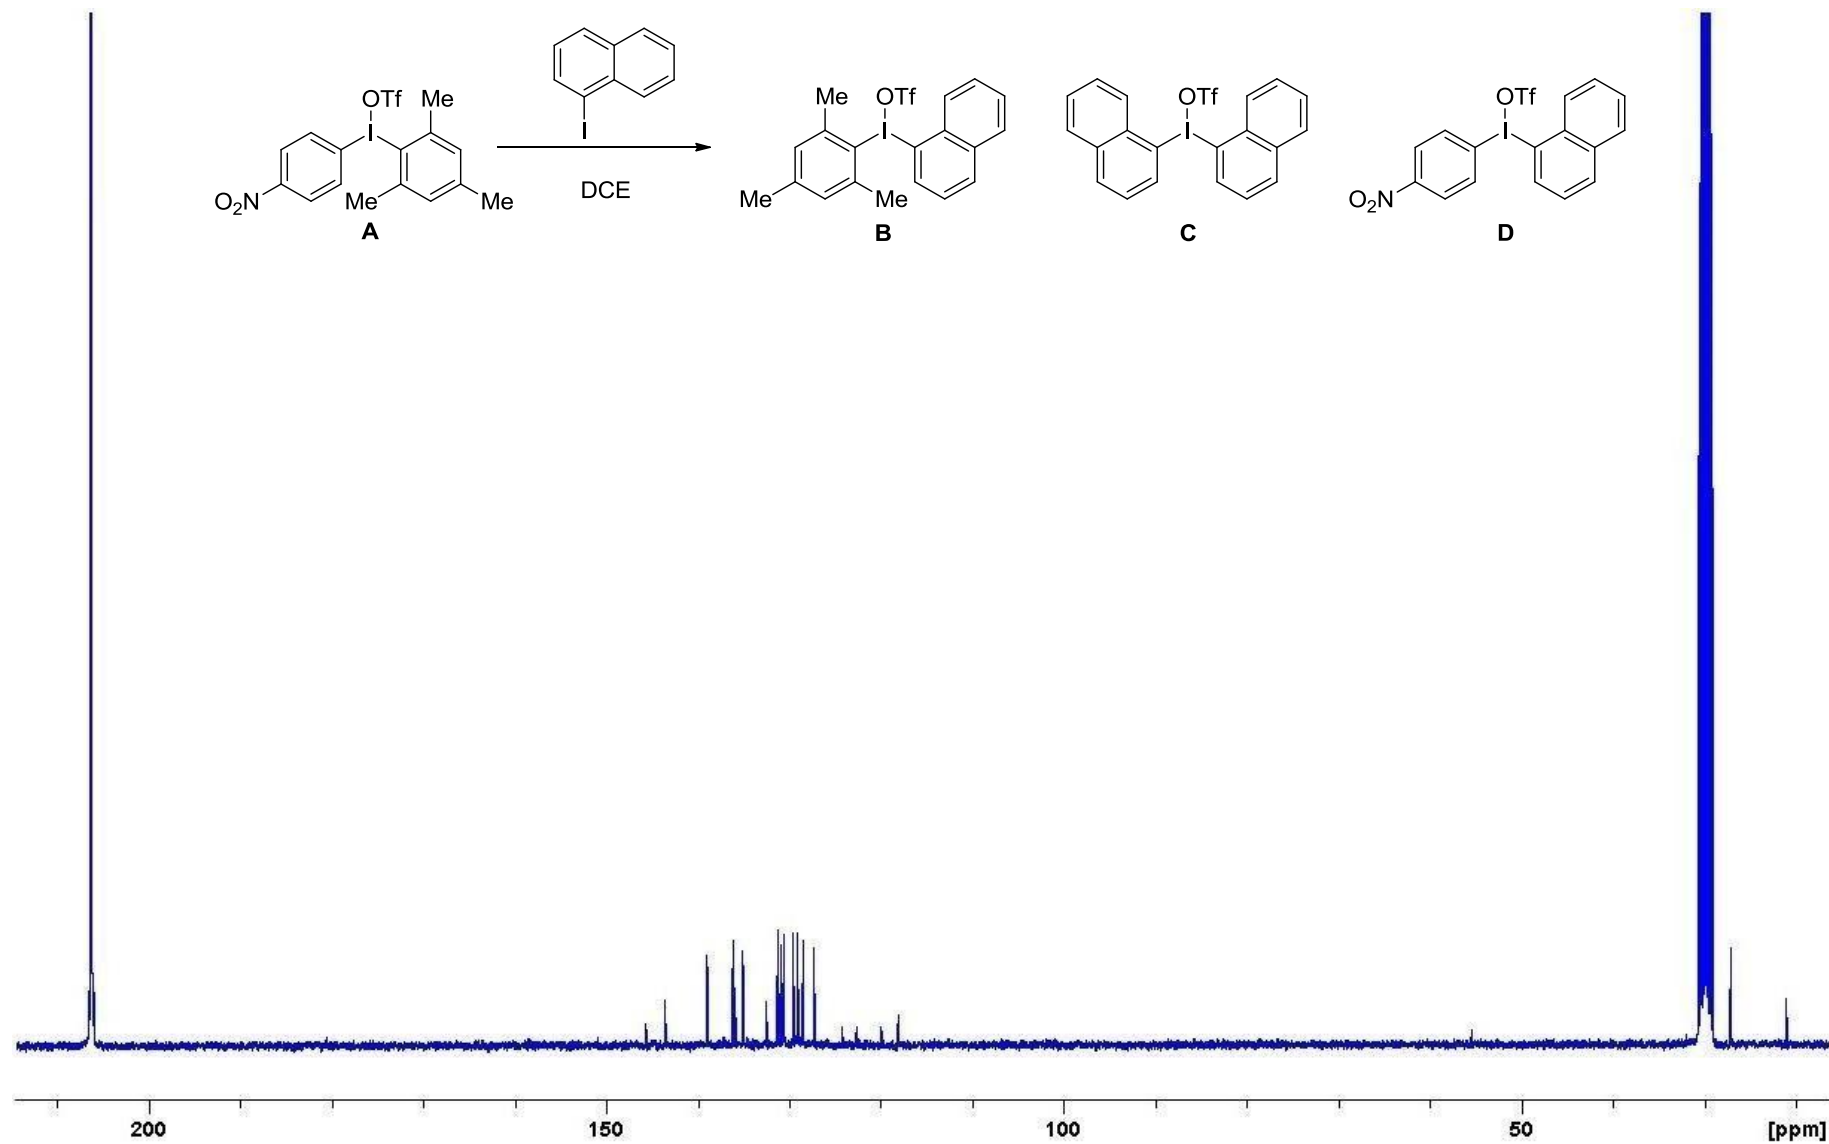

$^{13}\text{C}$  NMR spectrum of the product mixture obtained in entry k of Table 3 (acetone- $d_6$ )

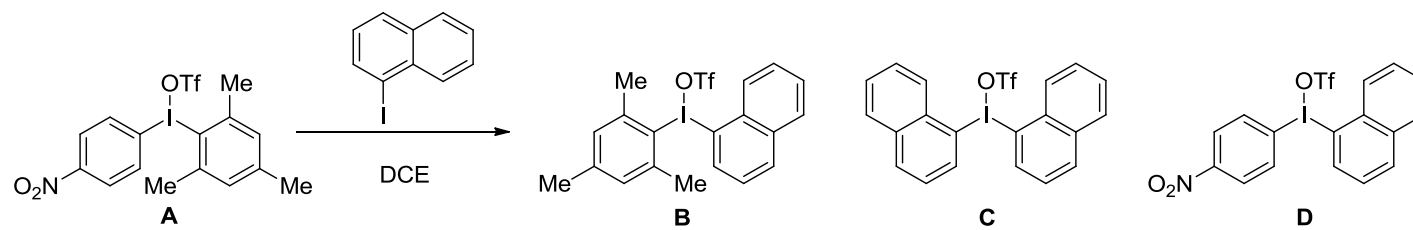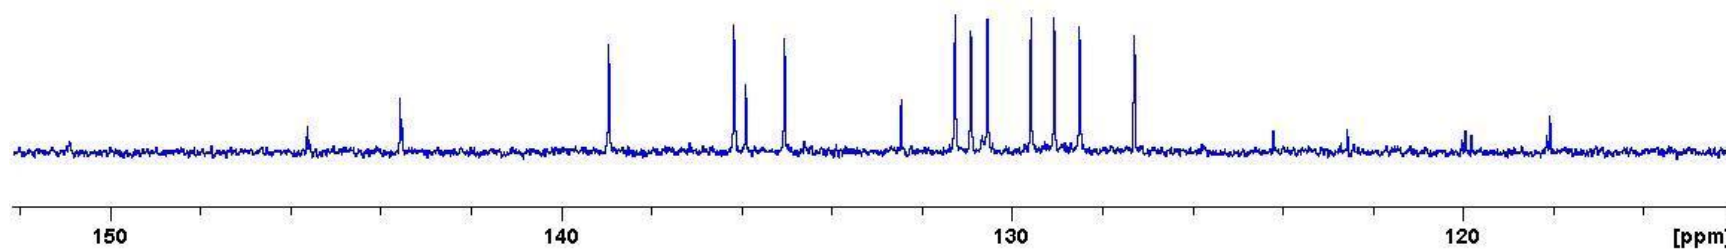

Expanded  $^{13}\text{C}$  NMR spectrum of the product mixture obtained in entry k of Table 3 (acetone- $d_6$ )

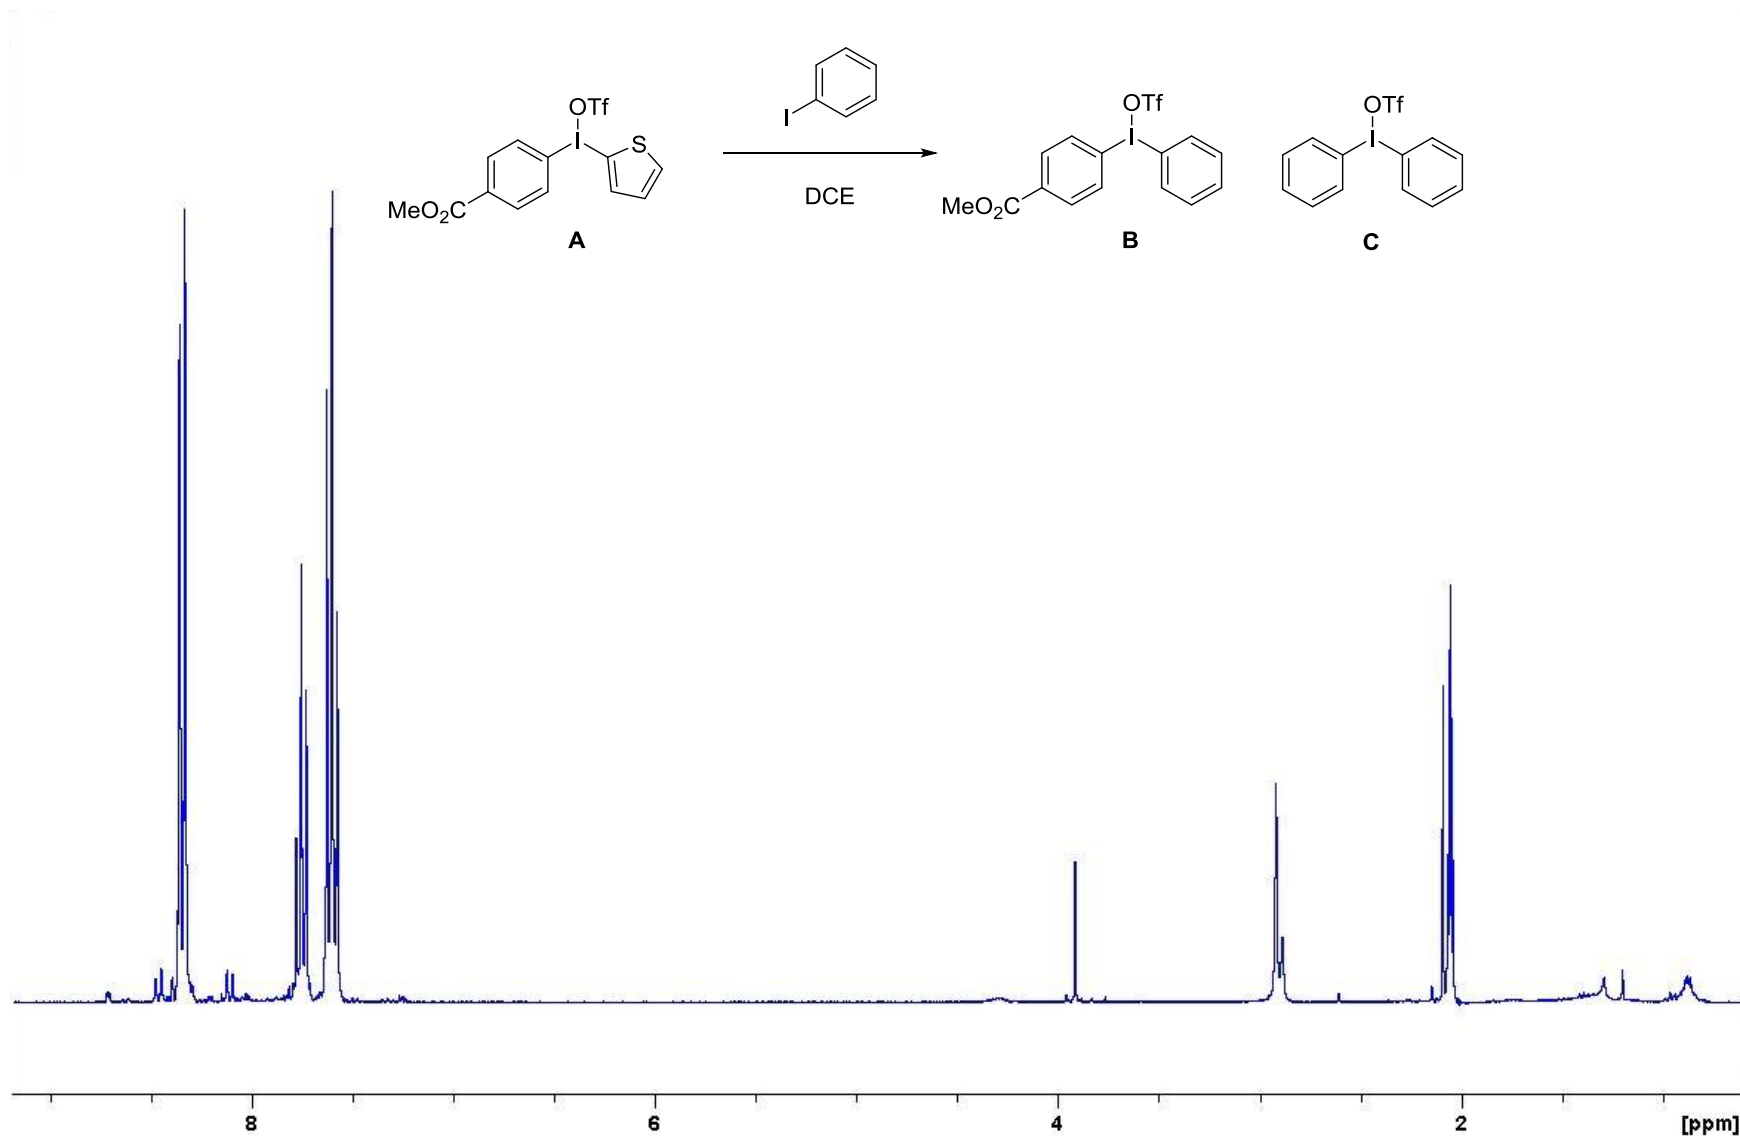

$^1\text{H}$  NMR spectrum of the product mixture obtained in entry a of Table 4 (acetone- $d_6$ )

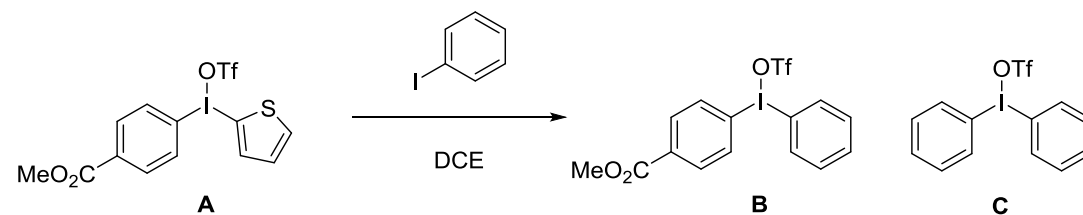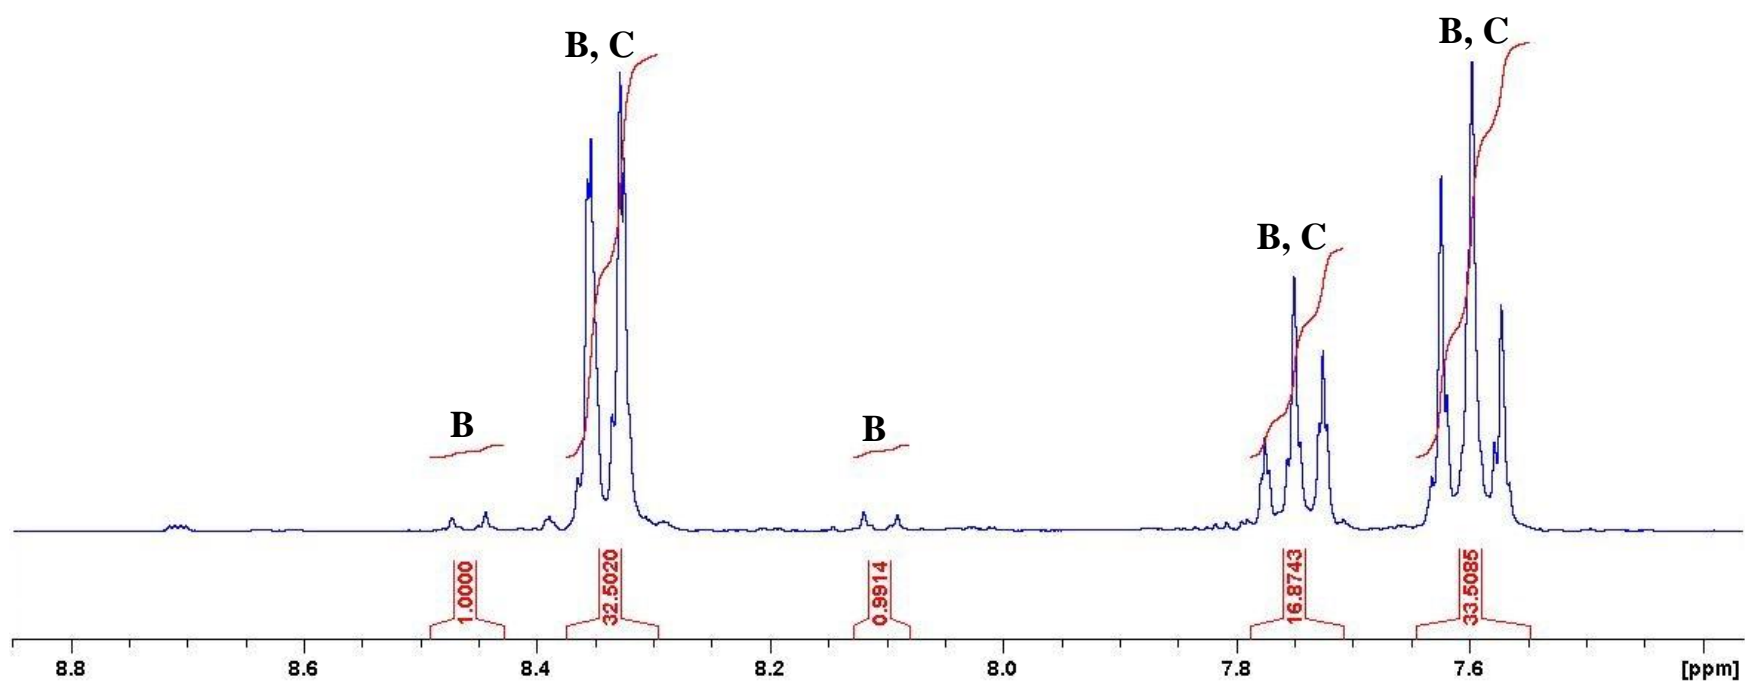

Expanded <sup>1</sup>H NMR spectrum of the product mixture obtained in entry a of Table 4 (acetone-*d*<sub>6</sub>)

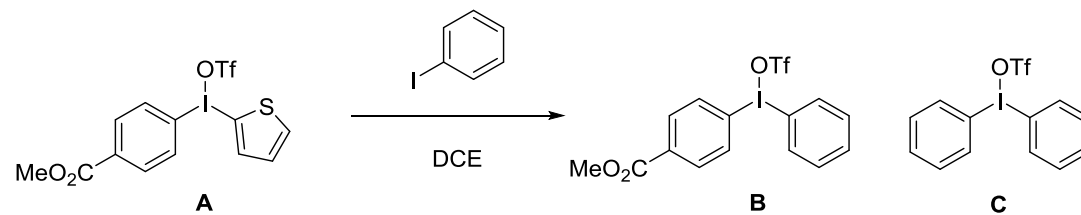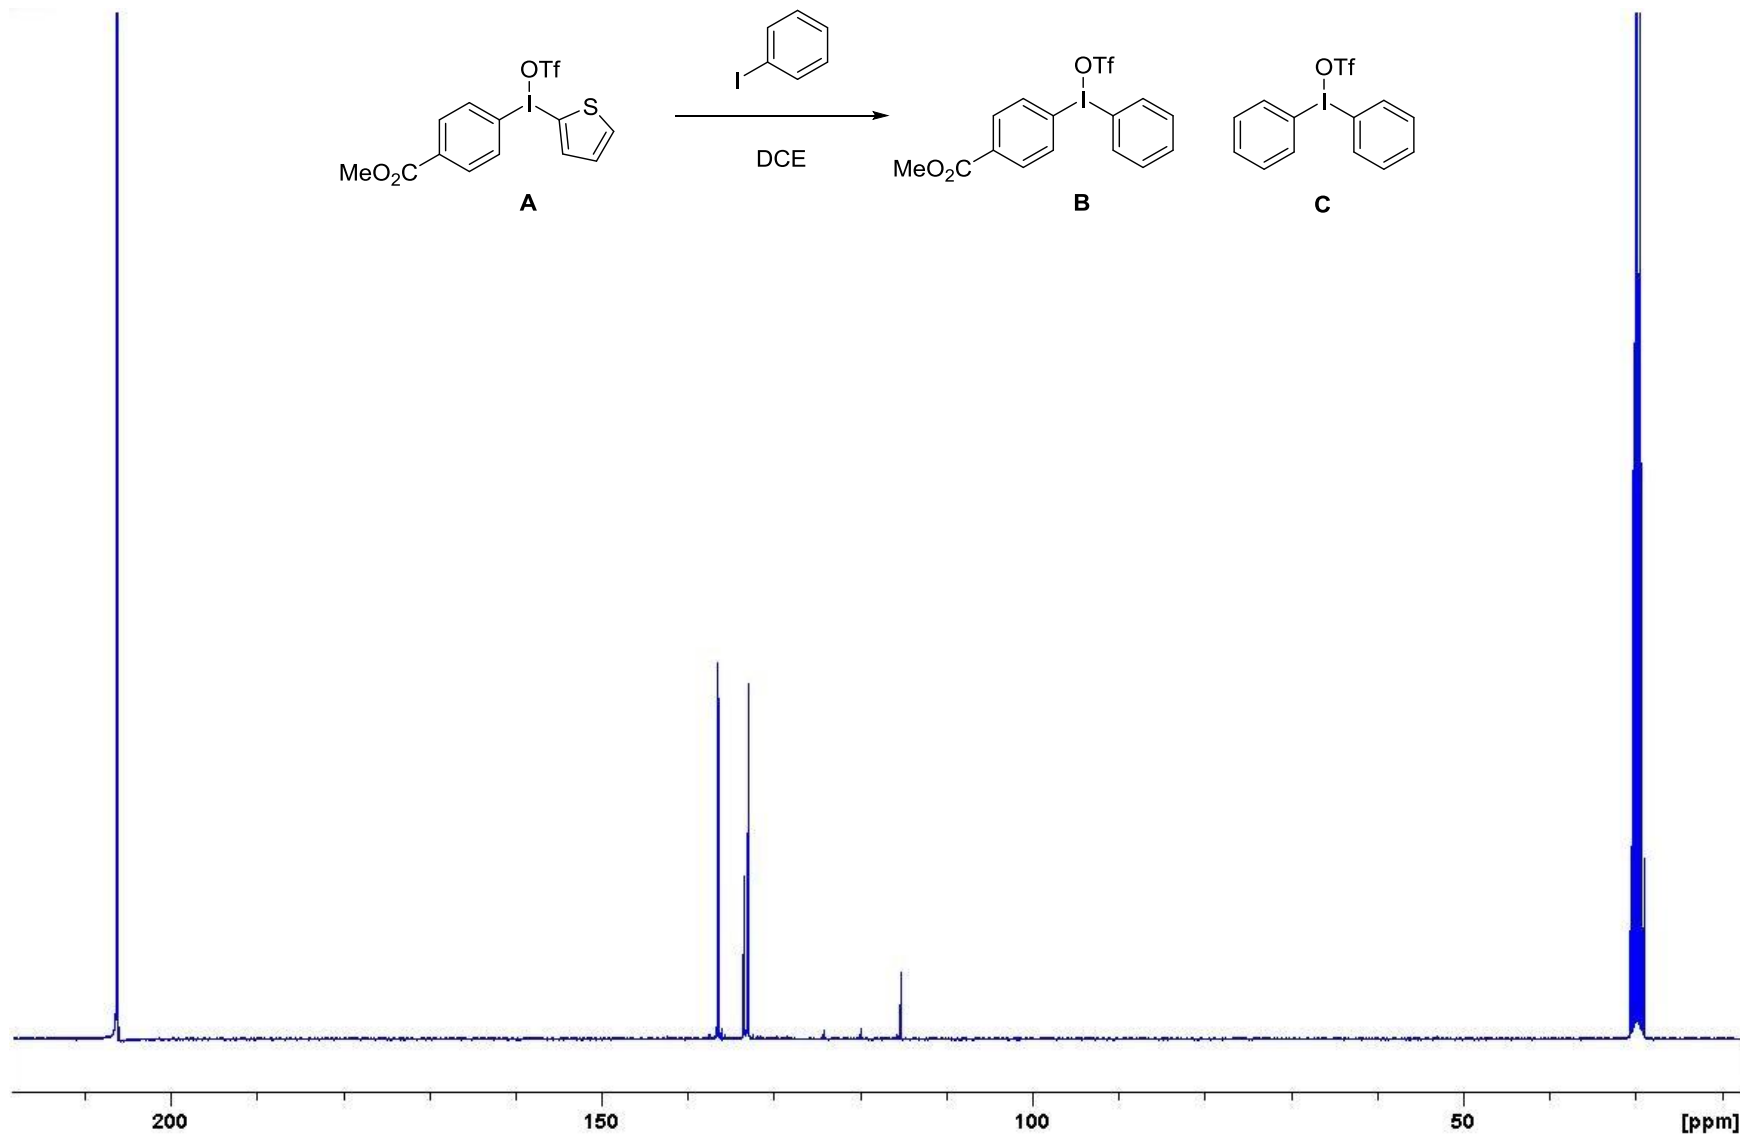

$^{13}\text{C}$  NMR spectrum of the product mixture obtained in entry a of Table 4 (acetone- $d_6$ )

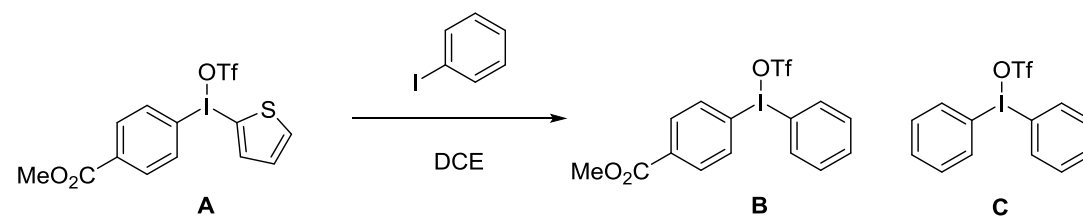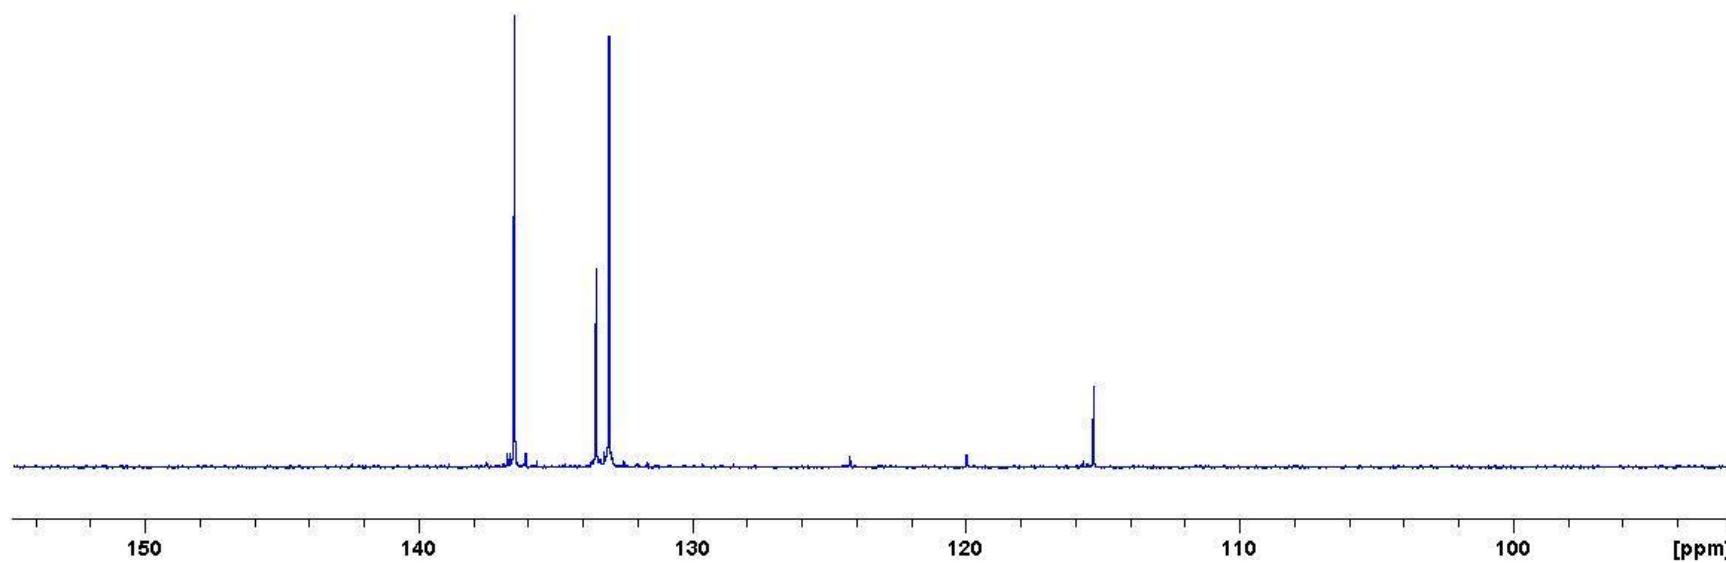

Expanded  $^{13}\text{C}$  NMR spectrum of the product mixture obtained in entry a of Table 4 (acetone- $d_6$ )



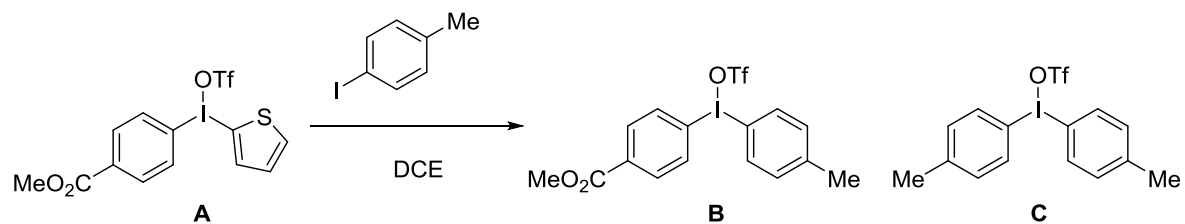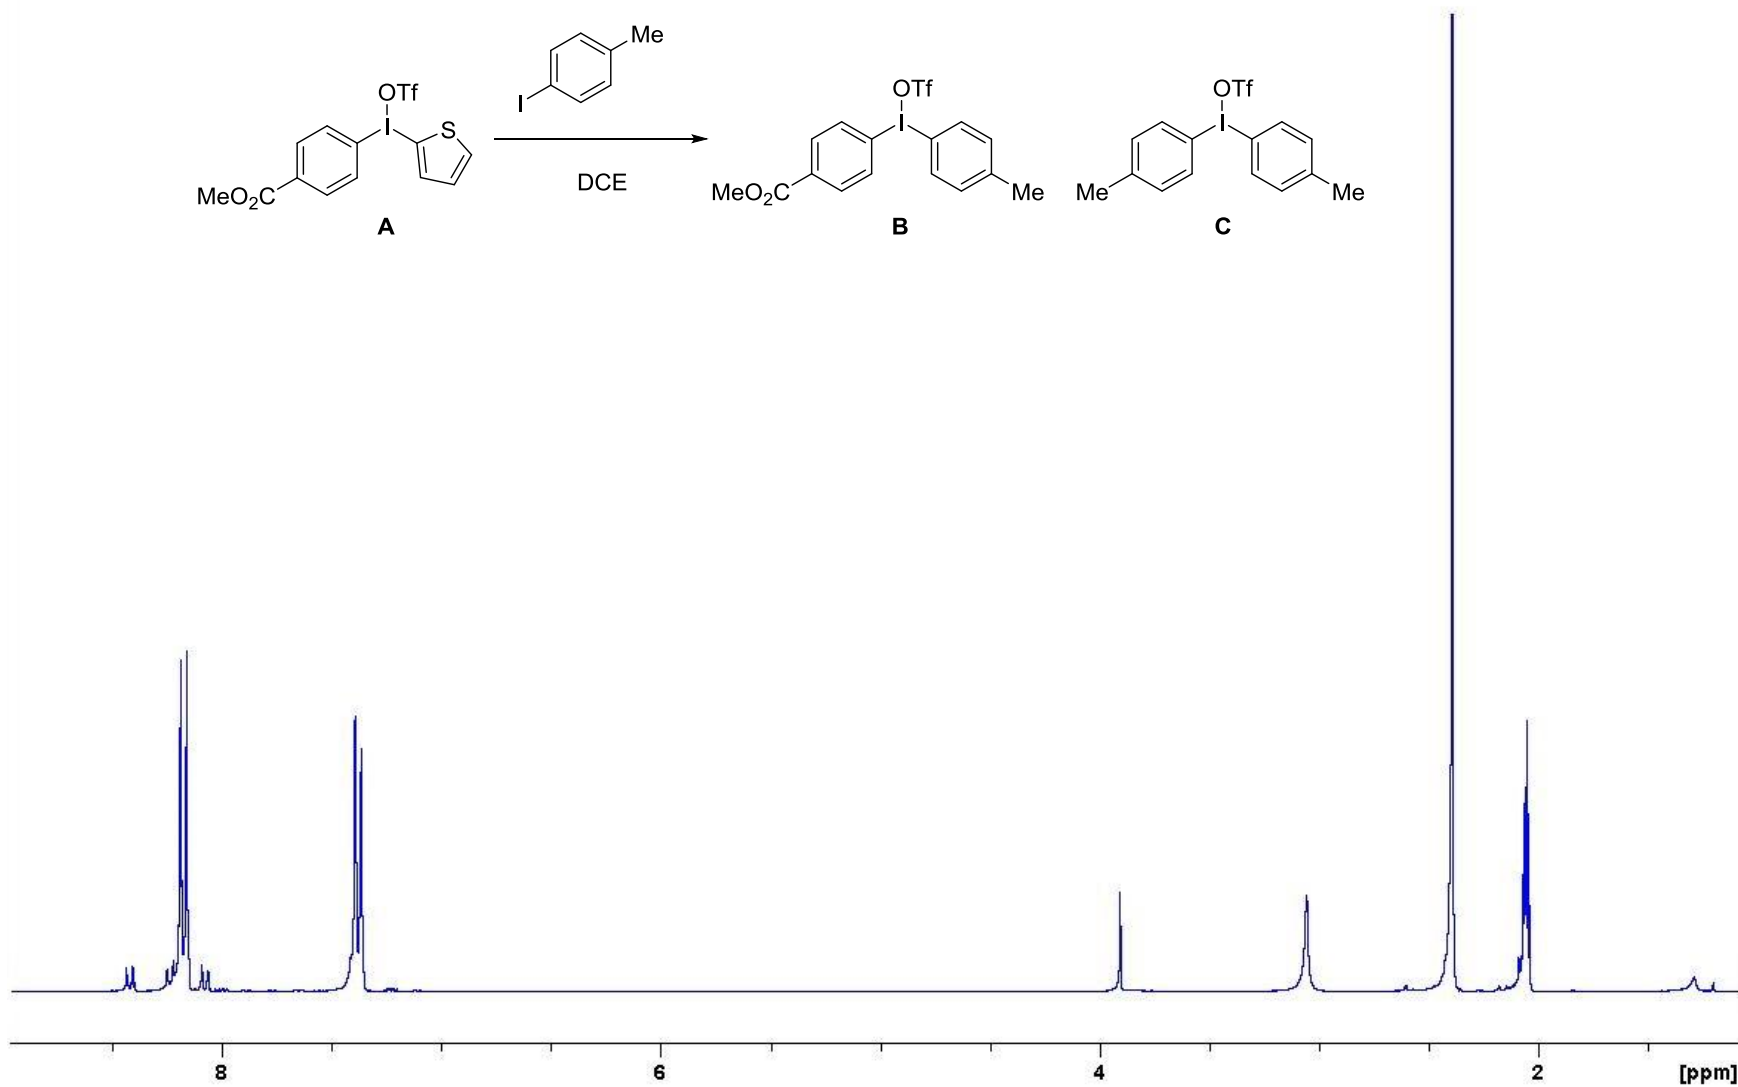

$^1\text{H}$  NMR spectrum of the product mixture obtained in entry b of Table 4 (acetone- $d_6$ )

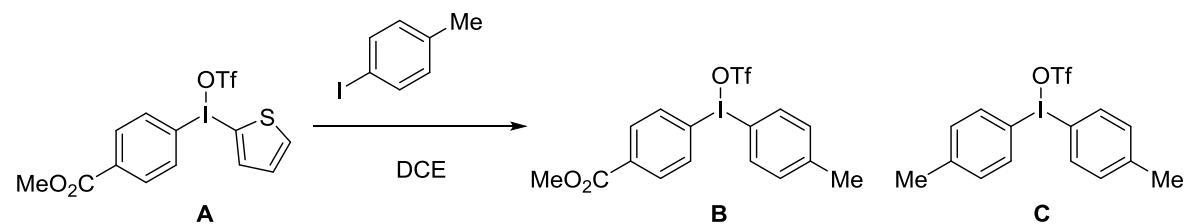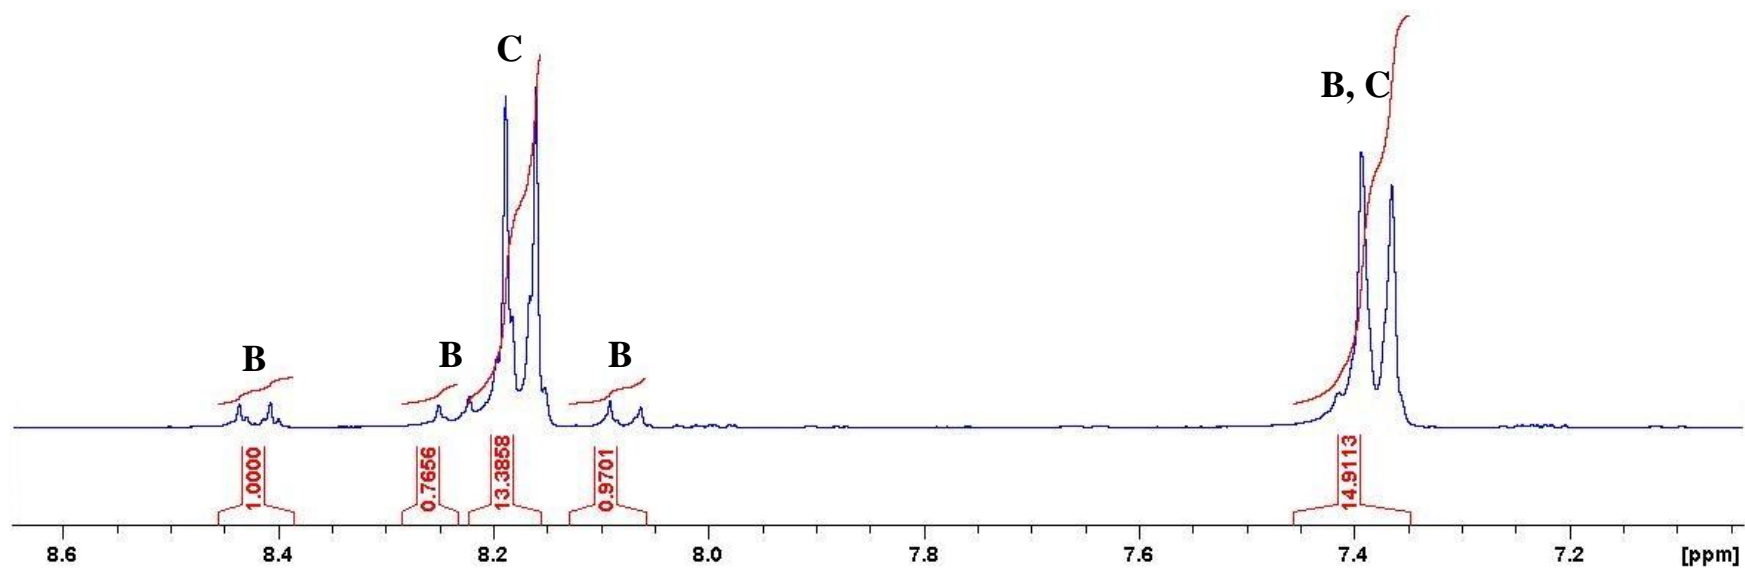

Expanded  $^1\text{H}$  NMR spectrum of the product mixture obtained in entry b of Table 4 ( $\text{acetone-}d_6$ )

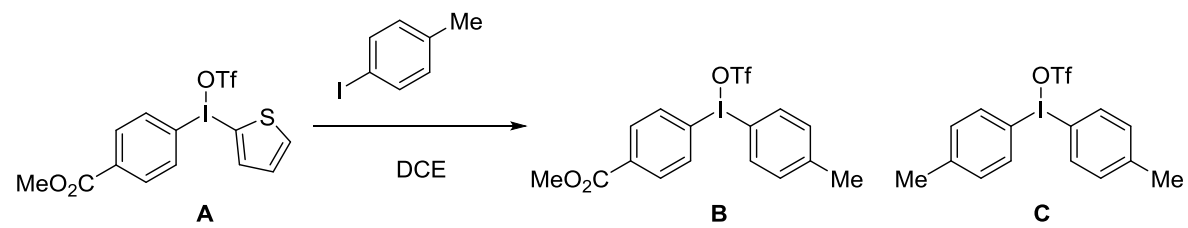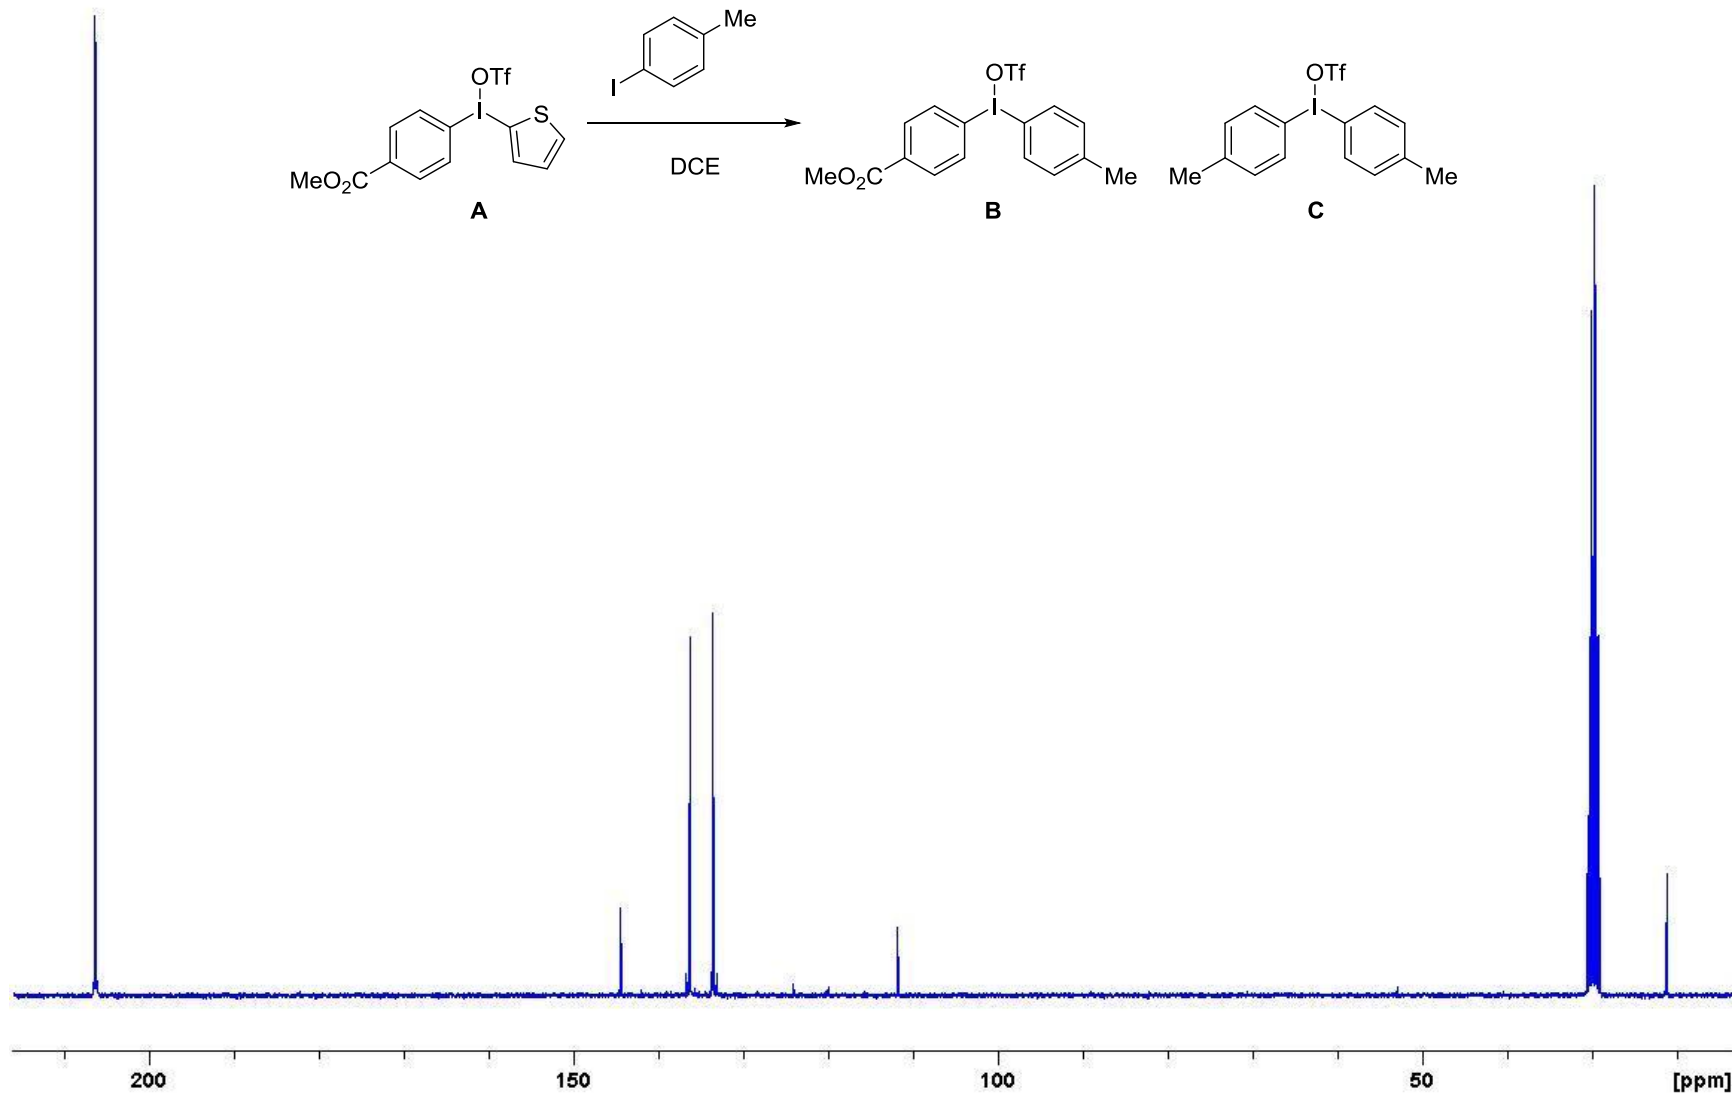

$^{13}\text{C}$  NMR spectrum of the product mixture obtained in entry b of Table 4 (acetone- $d_6$ )

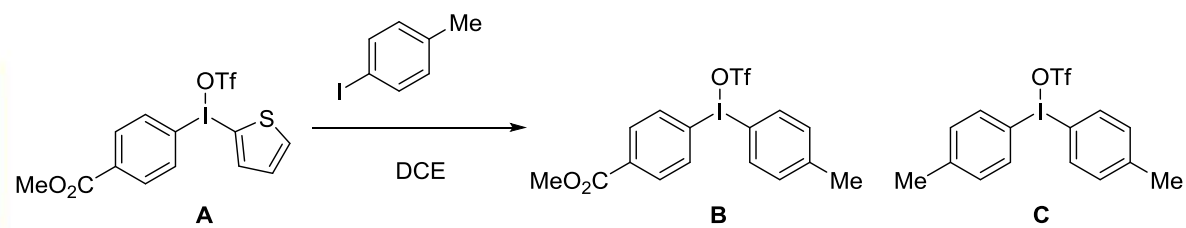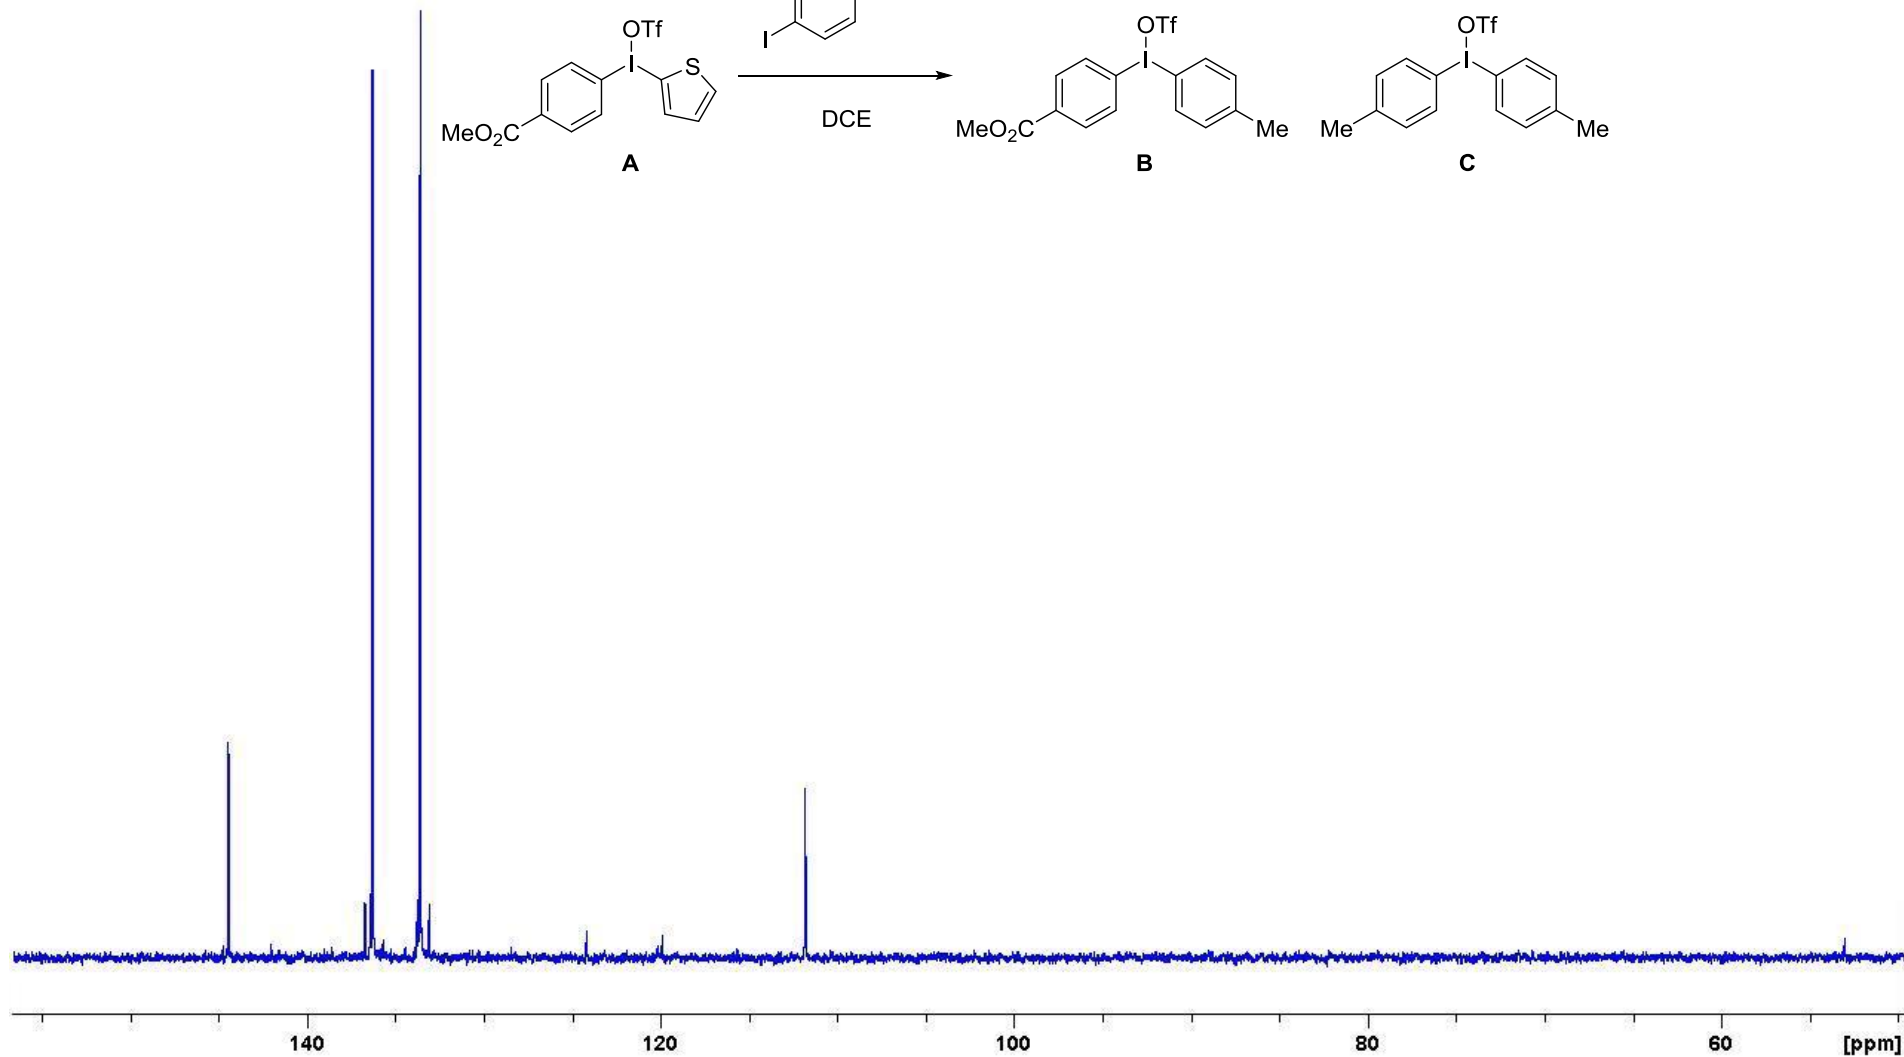

Expanded  $^{13}\text{C}$  NMR spectrum of the product mixture obtained in entry b of Table 4 (acetone- $d_6$ )

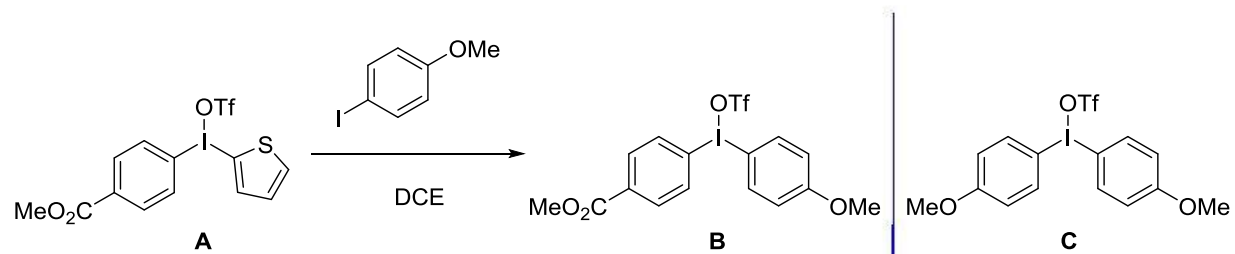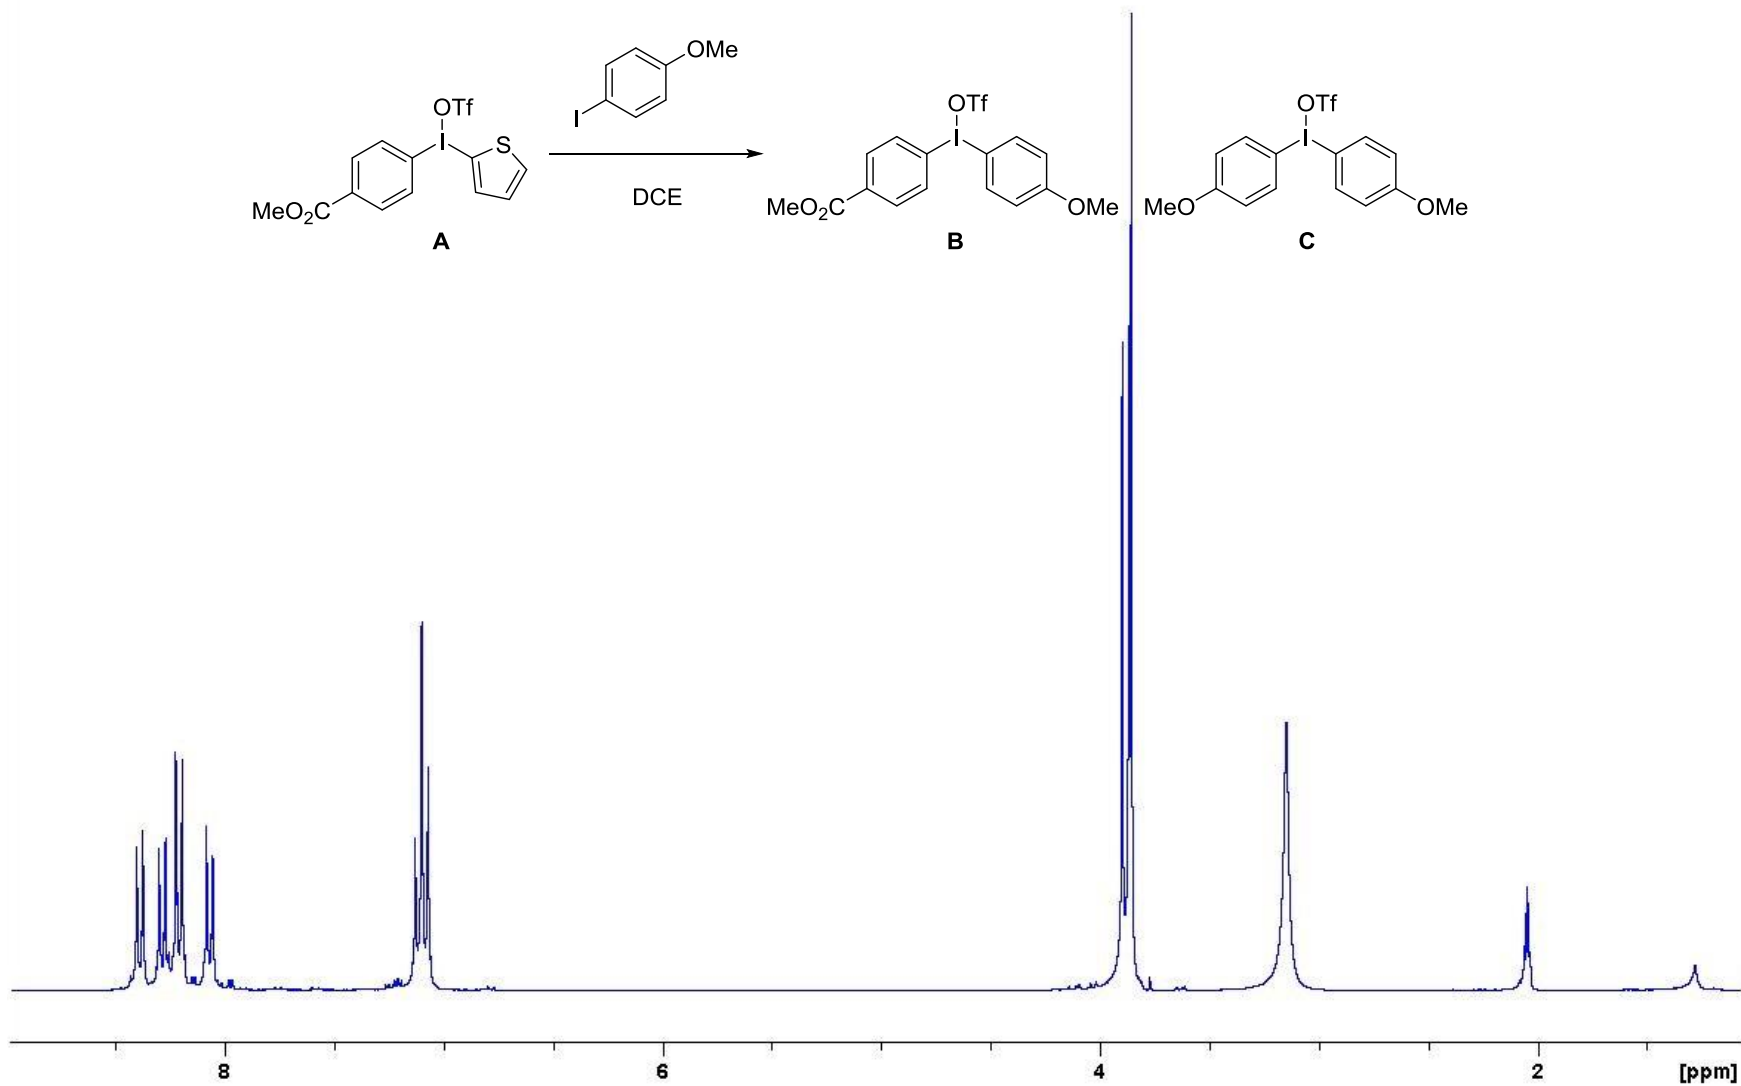

$^1\text{H}$  NMR spectrum of the product mixture obtained in entry c of Table 4 (acetone- $d_6$ )

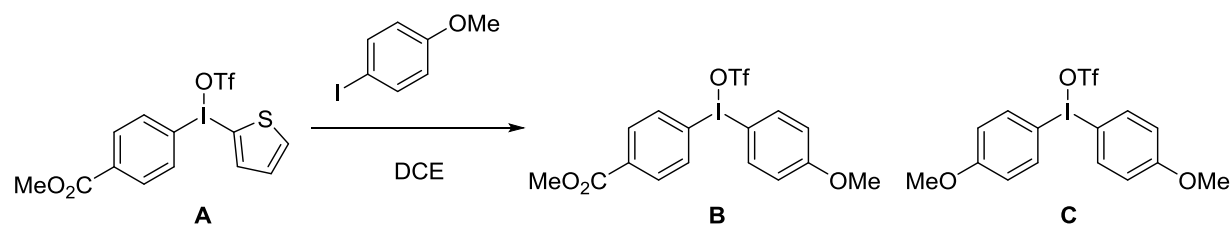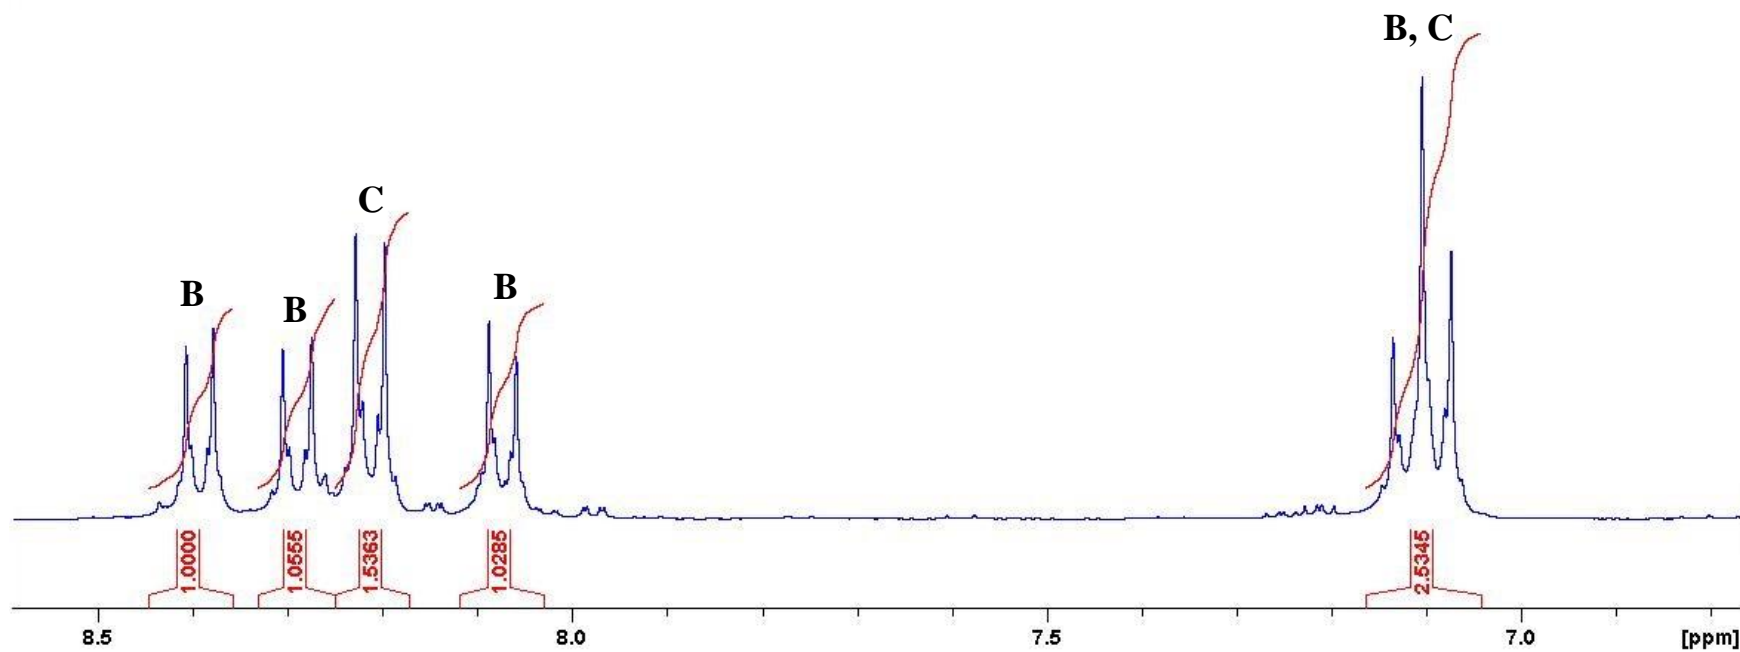

Expanded <sup>1</sup>H NMR spectrum of the product mixture obtained in entry c of Table 4 (acetone-*d*<sub>6</sub>)

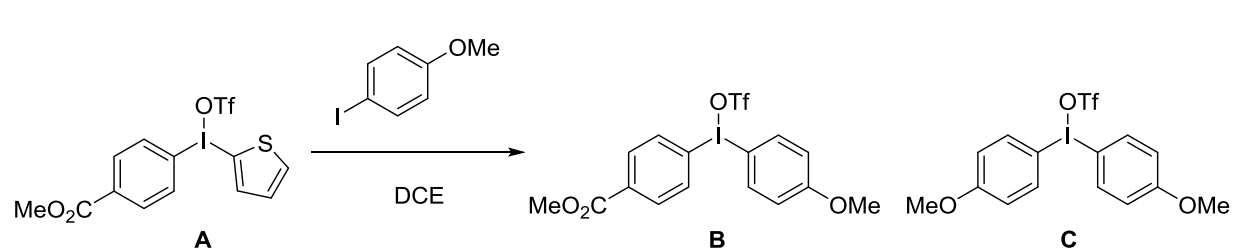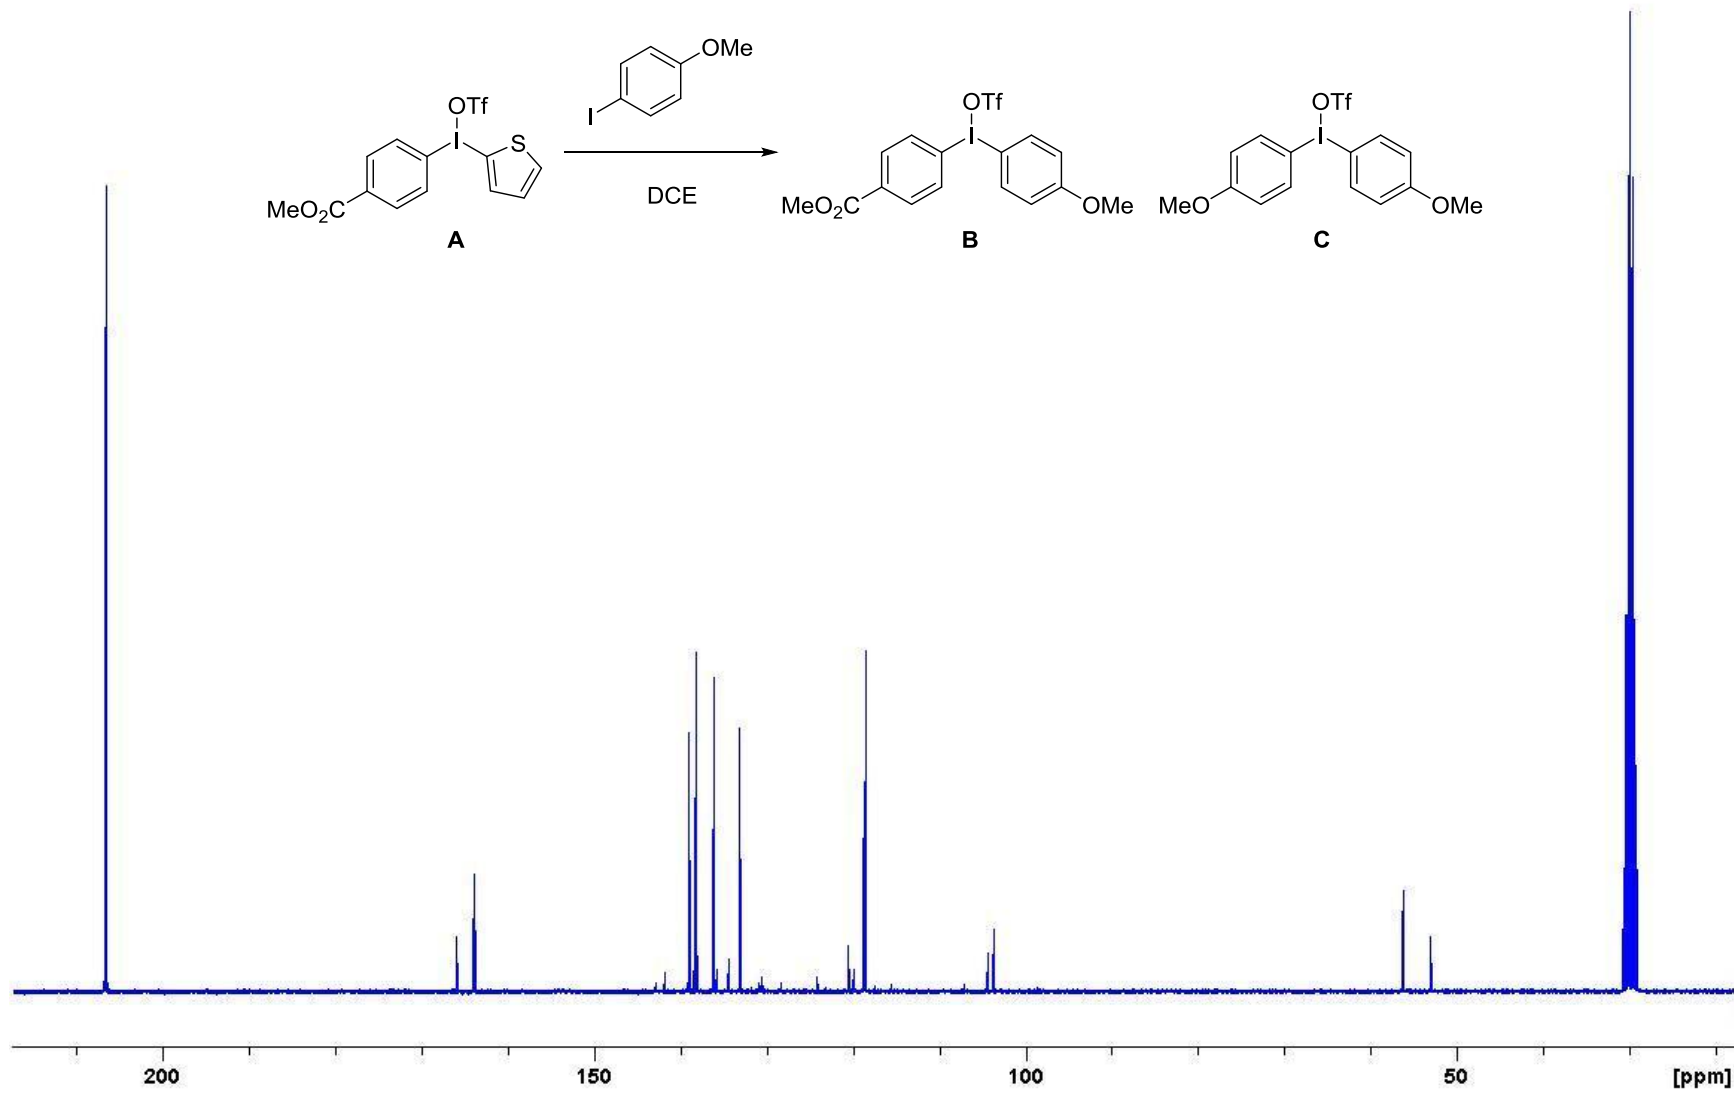

$^{13}\text{C}$  NMR spectrum of the product mixture obtained in entry c of Table 4 (acetone- $d_6$ )

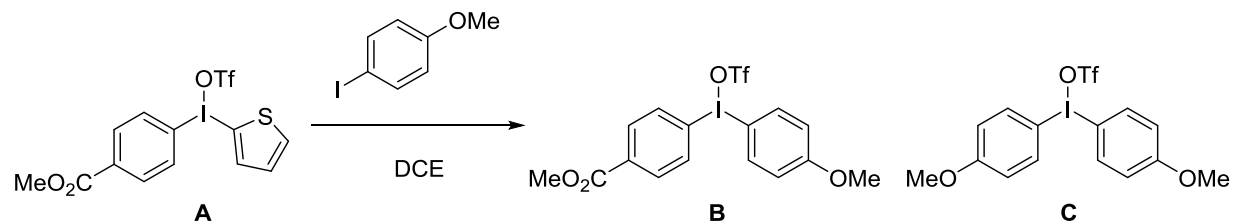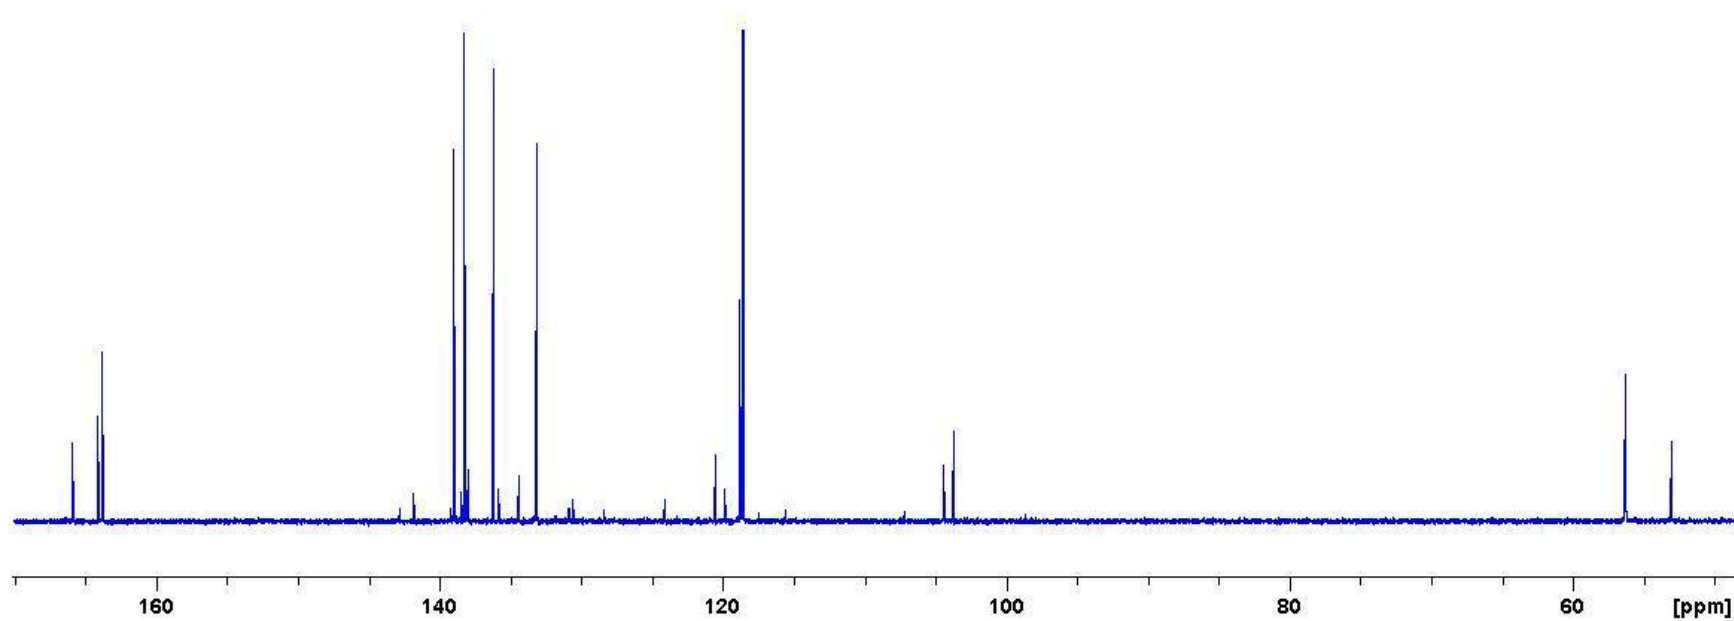

Expanded  $^{13}\text{C}$  NMR spectrum of the product mixture obtained in entry c of Table 4 (acetone- $d_6$ )



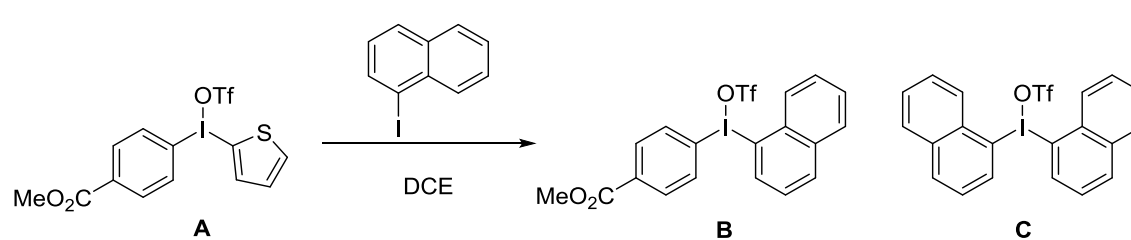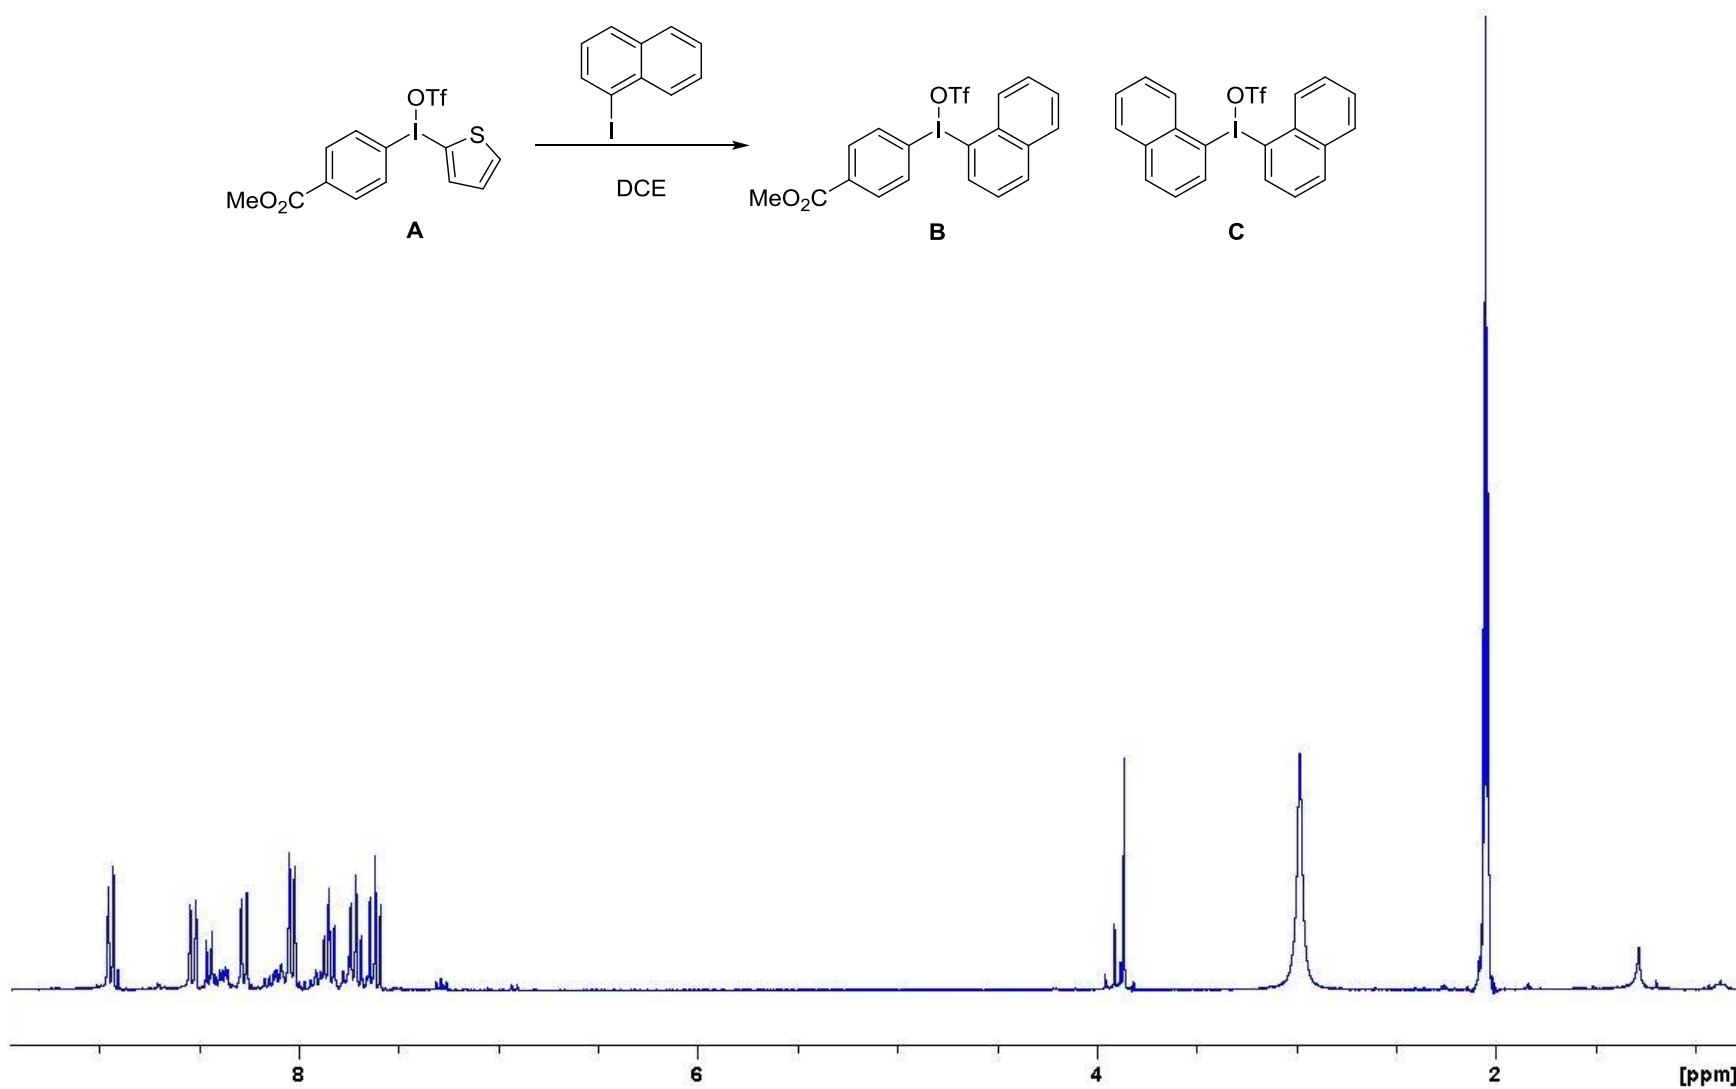

**<sup>1</sup>H NMR spectrum of the product mixture obtained in entry d of Table 4 (acetone-*d*<sub>6</sub>)**

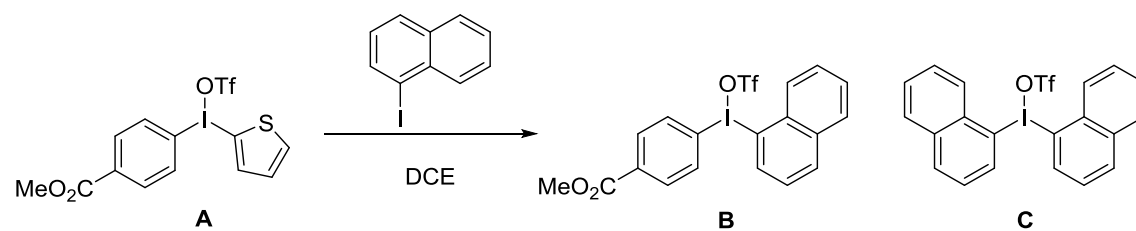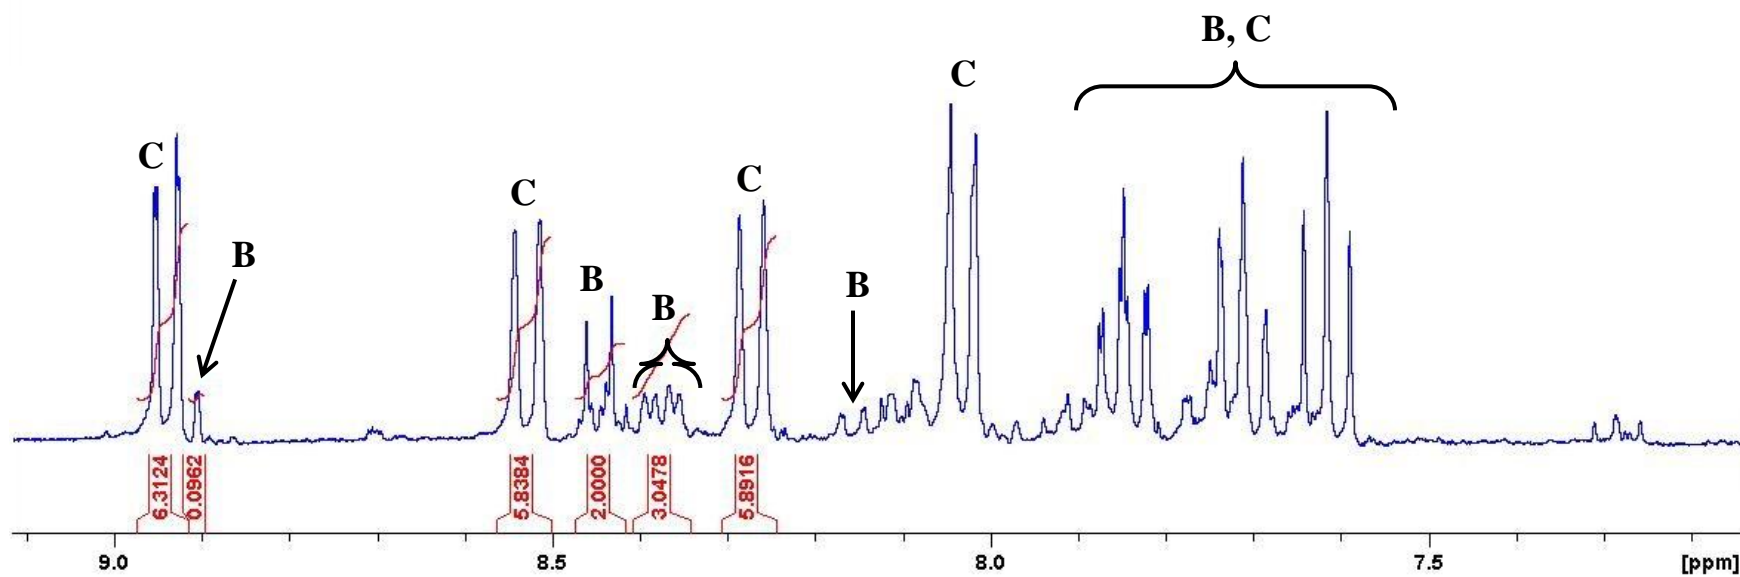

Expanded <sup>1</sup>H NMR spectrum of the product mixture obtained in entry d of Table 4 (acetone-*d*<sub>6</sub>)

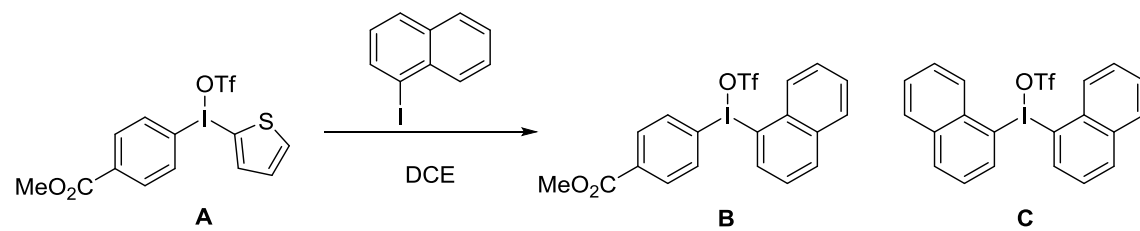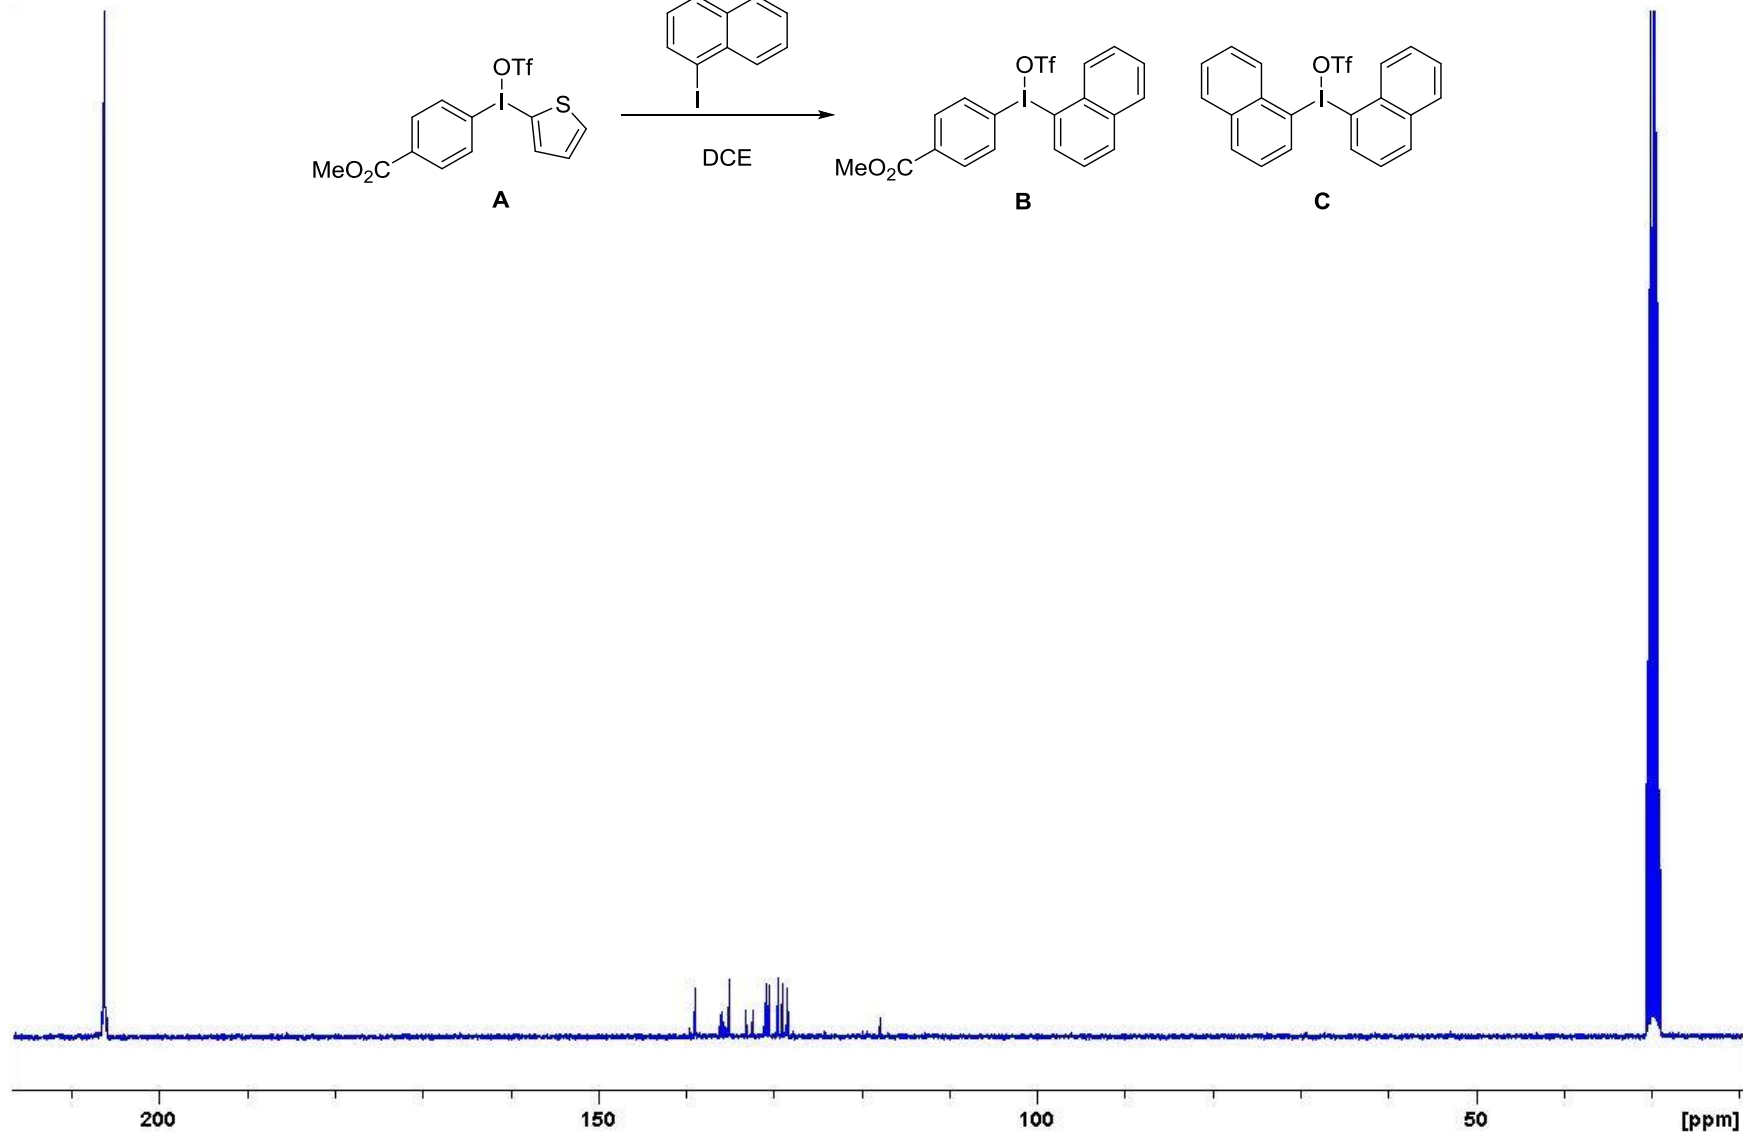

$^{13}\text{C}$  NMR spectrum of the product mixture obtained in entry d of Table 4 (acetone- $d_6$ )

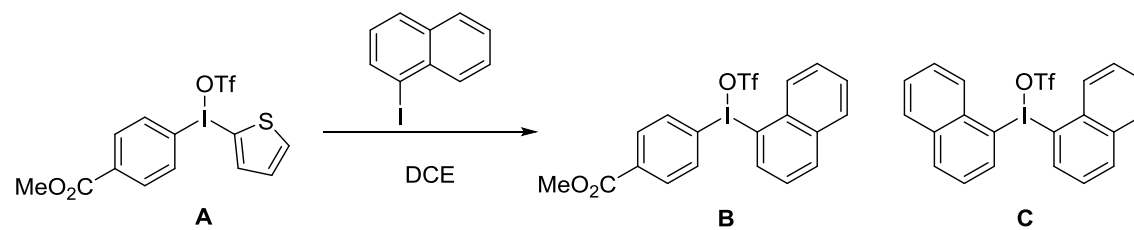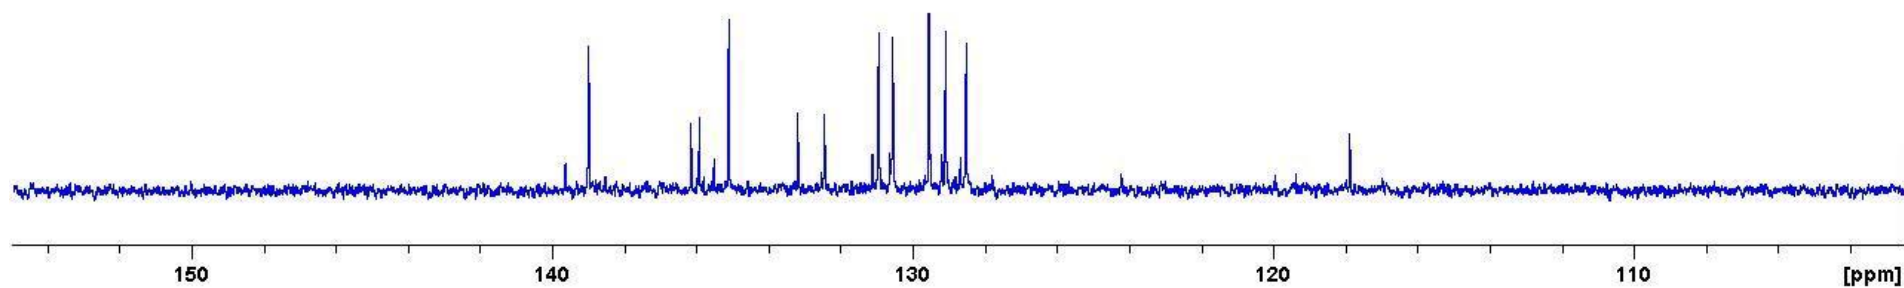

Expanded  $^{13}\text{C}$  NMR spectrum of the product mixture obtained in entry d of Table 4 (acetone- $d_6$ )
